# Supplementary material for: A bidirectional corticoamygdala circuit for the encoding and retrieval of detailed reward memories
Source: eLife journal article supplement (doi:10.7554/elife.68617), 2021-06-17
Supplement: supp [file elife-68617-supp-v1.zip]

Archive with 19 entries (19 files):
- elife_poa_e68617_Transparent_Reporting_File.pdf
- elife_poa_e68617_Figure_1_source_data_1.xlsx
- elife_poa_e68617_Figure_2_source_data_1.xlsx
- elife_poa_e68617_Figure_3_source_data_1.xlsx
- elife_poa_e68617_Figure_4_source_data_1.xlsx
- elife_poa_e68617_Figure_5_source_data_1.xlsx
- elife_poa_e68617_Source_code_1.m
- elife_poa_e68617_Figure_1_figure_supplement_1.ai
- elife_poa_e68617_Figure_1_figure_supplement_2.ai
- elife_poa_e68617_Figure_1_figure_supplement_3.ai
- elife_poa_e68617_Figure_1_figure_supplement_4.ai
- elife_poa_e68617_Figure_1_figure_supplement_5.ai
- elife_poa_e68617_Figure_3_figure_supplement_1.ai
- elife_poa_e68617_Figure_3_figure_supplement_2.ai
- elife_poa_e68617_Figure_3_figure_supplement_3.ai
- elife_poa_e68617_Figure_4_figure_supplement_1.ai
- elife_poa_e68617_Figure_4_figure_supplement_2.ai
- elife_poa_e68617_Figure_5_figure_supplement_1.ai
- elife_poa_e68617_Figure_5_figure_supplement_2.ai
