# Supplementary material for: A bidirectional corticoamygdala circuit for the encoding and retrieval of detailed reward memories
Source: eLife journal article supplement (doi:10.7554/elife.68617), 2021-06-17
Supplement: supp [file elife-68617-supp-v1.zip › elife_poa_e68617_Figure_1_source_data_1.xlsx]

## Sheet: 1e, 1-2
1								2								3,4								5,6								7,8
Time (s)	GCaMP6f Z score	Raw GCaMP (473nm)	Fitted 415nm	Entry	Reward Delivery	Reward Retrieval		Time (s)	GCaMP6f Z score	Raw GCaMP (473nm)	Fitted 415nm	Entry	Reward Delivery	Reward Retrieval		Time (s)	GCaMP6f Z score	Raw GCaMP (473nm)	Fitted 415nm	Entry	Reward Delivery	Reward Retrieval		Time (s)	GCaMP6f Z score	Raw GCaMP (473nm)	Fitted 415nm	Entry	Reward Delivery	Reward Retrieval		Time (s)	GCaMP6f Z score	Raw GCaMP (473nm)	Fitted 415nm	Entry	Reward Delivery	Reward Retrieval
-5	-0.53687	1982.74	1985.5					-5	0.726461	1935.39	1933.09					-5	0.797842	1727.5	1724.66					-5	-0.167992	1770.97	1771.7					-5	-0.22674	1802.72	1803.6
-4.94874	-0.25085	1982.92	1985.05					-4.94874	0.541658	1934.73	1933.02					-4.94874	0.825755	1727.27	1724.73					-4.94874	-0.161142	1770.65	1771.35					-4.94874	-0.00436	1803.14	1803.15
-4.89748	-0.25723	1983.01	1983.93					-4.89748	0.111054	1933.69	1933.34					-4.89748	0.648571	1726.99	1724.53					-4.89748	-0.252338	1770.63	1771.73					-4.89748	-0.18117	1802.71	1803.41
-4.84621	-0.63558	1983.67	1984.05					-4.84621	-0.26674	1932.72	1933.57					-4.84621	0.310365	1726.74	1724.83					-4.84621	-0.146435	1771.01	1771.64					-4.84621	-0.53905	1802.45	1804.55
-4.79495	-0.77289	1984.19	1986.24					-4.79495	-0.53212	1932.21	1933.89					-4.79495	0.10694	1726.33	1725.71					-4.79495	-0.0113677	1771.23	1771.28					-4.79495	-0.62615	1802.6	1805.03
-4.74369	-0.7128	1983.9	1987.31					-4.74369	-0.3132	1932.88	1933.87					-4.74369	0.163277	1725.47	1725.98					-4.74369	-0.0302681	1770.94	1771.08					-4.74369	-0.4358	1802.33	1804.02
-4.69243	-0.51441	1983.82	1986.78					-4.69243	-0.05967	1933.12	1933.31					-4.69243	0.391048	1724.98	1724.93					-4.69243	-0.0350479	1770.55	1770.7					-4.69243	-0.26858	1802.15	1803.19
-4.64117	-0.18789	1983.95	1985.9					-4.64117	-0.06324	1932.97	1933.17					-4.64117	0.395275	1724.94	1723.68					-4.64117	-0.10136	1770.01	1770.45					-4.64117	-0.36223	1801.54	1802.95
-4.58991	-0.15473	1984.36	1984.71					-4.58991	0.128351	1933.9	1933.49					-4.58991	0.408388	1725.19	1723.63					-4.58991	-0.290321	1769.19	1770.45					-4.58991	-0.69169	1800.11	1802.8
-4.53864	0.065254	1985.06	1984.99					-4.53864	0.18362	1934.43	1933.85					-4.53864	0.565211	1725.59	1723.84					-4.53864	-0.370649	1769.48	1771.09					-4.53864	-0.94781	1799.07	1802.75
-4.48738	0.052869	1984.86	1984.8					-4.48738	0.122388	1934.19	1933.8					-4.48738	0.489126	1725.19	1723.72					-4.48738	-0.378551	1770.02	1771.67					-4.48738	-0.71712	1799.24	1802.03
-4.43612	-0.43193	1984.78	1984.65					-4.43612	0.174236	1933.76	1933.21					-4.43612	0.363981	1724.4	1723.57					-4.43612	-0.453891	1769.35	1771.32					-4.43612	-0.31142	1799.79	1801
-4.38486	-0.33834	1984.83	1986.52					-4.38486	0.006732	1932.97	1932.94					-4.38486	0.383967	1724.45	1723.19					-4.38486	-0.472799	1769.06	1771.11					-4.38486	-0.2834	1798.94	1800.04
-4.3336	-0.1117	1983.27	1986.19					-4.3336	-0.07956	1933.29	1933.54					-4.3336	0.686436	1725.01	1723.17					-4.3336	-0.504283	1769.73	1771.92					-4.3336	-0.42613	1797.76	1799.41
-4.28233	-0.23542	1981.29	1983.72					-4.28233	0.226722	1934.97	1934.25					-4.28233	0.914263	1724.94	1722.73					-4.28233	-0.568344	1769.85	1772.32					-4.28233	-0.49656	1797.05	1798.97
-4.23107	-0.07846	1981.36	1982.23					-4.23107	0.301066	1935.41	1934.46					-4.23107	0.485731	1724.36	1721.91					-4.23107	-0.554284	1769.82	1772.23					-4.23107	-0.70161	1796.12	1798.83
-4.17981	0.063728	1982.19	1981.67					-4.17981	0.037749	1934.68	1934.56					-4.17981	0.100569	1724.03	1722.75					-4.17981	-0.337368	1770.7	1772.16					-4.17981	-0.87373	1796.3	1799.69
-4.12855	-0.33716	1981.62	1981.94					-4.12855	-0.10842	1934.63	1934.97					-4.12855	0.171443	1724.1	1723.69					-4.12855	-0.116131	1770.81	1771.31					-4.12855	-0.86685	1797.32	1800.68
-4.07729	-0.50292	1981.64	1982.98					-4.07729	-0.11196	1934.72	1935.07					-4.07729	0.305535	1724.51	1723.53					-4.07729	-0.206229	1769.79	1770.69					-4.07729	-0.79972	1798.06	1801.16
-4.02603	-0.1811	1982.38	1983.67					-4.02603	-0.23313	1934.05	1934.79					-4.02603	0.527394	1724.85	1723.49					-4.02603	-0.32105	1769.76	1771.16					-4.02603	-0.67121	1798.7	1801.31
-3.97476	-0.08275	1982.06	1983.11					-3.97476	-0.41804	1933.35	1934.67					-3.97476	0.57608	1725.04	1723.1					-3.97476	-0.216965	1770.88	1771.83					-3.97476	-0.50756	1799.87	1801.84
-3.9235	-0.257	1981.43	1982.4					-3.9235	-0.46697	1932.91	1934.39					-3.9235	0.627311	1725.16	1723.13					-3.9235	-0.121893	1771.75	1772.28					-3.9235	-0.12626	1802.36	1802.85
-3.87224	-0.40715	1981.79	1982.46					-3.87224	-0.49857	1932.61	1934.18					-3.87224	0.829999	1725.13	1723.08					-3.87224	-0.144487	1771.44	1772.07					-3.87224	0.299387	1804.75	1803.59
-3.82098	-0.4796	1983.54	1983.43					-3.82098	-0.26789	1933.04	1933.89					-3.82098	0.595226	1725.03	1722.38					-3.82098	-0.3325	1769.95	1771.4					-3.82098	0.154746	1805	1804.4
-3.76972	-0.38072	1984.97	1985.47					-3.76972	0.083874	1933.45	1933.18					-3.76972	0.236933	1725.03	1723.05					-3.76972	-0.498781	1768.71	1770.88					-3.76972	-0.29863	1803.67	1804.83
-3.71845	-0.50836	1984.67	1986.5					-3.71845	-0.0531	1932.83	1933					-3.71845	0.532569	1725.73	1724.25					-3.71845	-0.477104	1767.97	1770.04					-3.71845	-0.43399	1802.29	1803.97
-3.66719	-0.62503	1984.49	1986.72					-3.66719	-0.23688	1932.41	1933.16					-3.66719	0.960806	1726.04	1723.97					-3.66719	-0.682061	1766.66	1769.62					-3.66719	-0.2324	1801.6	1802.51
-3.61593	-0.00936	1985.56	1987.02					-3.61593	-0.13322	1933.07	1933.49					-3.61593	0.764863	1725.58	1722.86					-3.61593	-0.850844	1766.23	1769.93					-3.61593	-0.07515	1800.52	1800.81
-3.56467	0.630687	1986.33	1985.6					-3.56467	0.082394	1933.72	1933.46					-3.56467	0.608452	1726.12	1723.04					-3.56467	-0.572643	1767.35	1769.84					-3.56467	-0.18191	1798.48	1799.18
-3.51341	0.632506	1986.47	1983.79					-3.51341	0.229381	1933.34	1932.62					-3.51341	0.870689	1727.08	1724.1					-3.51341	-0.377469	1768.03	1769.66					-3.51341	-0.52663	1796.63	1798.67
-3.46215	0.416434	1986.92	1983.92					-3.46215	-0.04717	1932.44	1932.59					-3.46215	0.903908	1726.53	1724.19					-3.46215	-0.404363	1767.99	1769.74					-3.46215	-0.82301	1795.75	1798.94
-3.41088	0.529927	1987.62	1985.25					-3.41088	-0.63115	1931.45	1933.44					-3.41088	0.650878	1725.16	1723.53					-3.41088	-0.328633	1767.76	1769.19					-3.41088	-0.67014	1795.83	1798.43
-3.35962	0.833648	1988.09	1985.48					-3.35962	-1.08956	1930.39	1933.84					-3.35962	0.469307	1724.74	1723					-3.35962	-0.27423	1766.7	1767.89					-3.35962	-0.61158	1795.71	1798.08
-3.30836	0.96692	1988.31	1984.73					-3.30836	-0.97442	1930.18	1933.26					-3.30836	0.356192	1724.56	1723.18					-3.30836	-0.491938	1765.68	1767.82					-3.30836	-0.88761	1795.34	1798.78
-3.2571	0.963214	1988.45	1984.41					-3.2571	-0.74598	1930.61	1932.96					-3.2571	0.161446	1723.59	1723.38					-3.2571	-0.644456	1766.41	1769.2					-3.2571	-0.93543	1795.62	1799.25
-3.20584	1.01047	1989.71	1984.57					-3.20584	-0.85254	1930.86	1933.55					-3.20584	-0.0622897	1722.87	1723.05					-3.20584	-0.315787	1768.19	1769.56					-3.20584	-0.85904	1796.33	1799.66
-3.15457	1.23766	1991.96	1985.64					-3.15457	-0.7078	1931.08	1933.31					-3.15457	-0.0335759	1723.49	1723.08					-3.15457	0.144455	1769.46	1768.83					-3.15457	-0.89396	1796.49	1799.96
-3.10331	1.40109	1992.88	1986.97					-3.10331	-0.45078	1930.79	1932.22					-3.10331	0.01192	1723.92	1723.6					-3.10331	0.183016	1769.84	1769.04					-3.10331	-1.08228	1795.84	1800.03
-3.05205	1.11384	1991.95	1987.23					-3.05205	-0.57139	1930.41	1932.21					-3.05205	-0.0901178	1723.66	1723.88					-3.05205	-0.0411749	1769.8	1769.98					-3.05205	-1.00852	1796.02	1799.93
-3.00079	0.734798	1991.08	1987.46					-3.00079	-0.6945	1931.01	1933.2					-3.00079	0.0667335	1723.81	1723.96					-3.00079	-0.16603	1770.04	1770.76					-3.00079	-0.46133	1797.17	1798.96
-2.94953	0.731866	1990.42	1988.11					-2.94953	-0.7041	1931.27	1933.5					-2.94953	0.521657	1724.19	1723.59					-2.94953	-0.325829	1770.01	1771.43					-2.94953	-0.18673	1797.74	1798.47
-2.89826	0.827632	1990.02	1987.47					-2.89826	-0.74081	1931	1933.34					-2.89826	0.7934	1724.49	1722.46					-2.89826	-0.44208	1769.64	1771.57					-2.89826	-0.42358	1797.45	1799.09
-2.847	0.826015	1990.59	1986.68					-2.847	-0.59314	1931.22	1933.1					-2.847	0.509341	1723.96	1721.86					-2.847	-0.478511	1769.55	1771.63					-2.847	-0.51284	1797.05	1799.04
-2.79574	0.943274	1991.24	1987.26					-2.79574	-0.68932	1930.76	1932.94					-2.79574	0.295655	1723.06	1722.27					-2.79574	-0.477866	1769.64	1771.71					-2.79574	-0.161	1797.57	1798.2
-2.74448	1.08885	1991.03	1987.44					-2.74448	-1.07037	1929.62	1933					-2.74448	0.409354	1722.79	1722.08					-2.74448	-0.381622	1769.8	1771.46					-2.74448	0.254136	1798.78	1797.8
-2.69322	0.845138	1989.52	1986.64					-2.69322	-0.9062	1929.54	1932.4					-2.69322	0.41872	1723.22	1721.43					-2.69322	-0.409416	1769.56	1771.34					-2.69322	0.185506	1799.14	1798.42
-2.64196	0.47478	1987.93	1986.12					-2.64196	-0.47856	1930.17	1931.68					-2.64196	0.355823	1724.08	1721.83					-2.64196	-0.443657	1768.99	1770.92					-2.64196	-0.2683	1799.19	1800.23
-2.59069	0.188501	1986.33	1986.01					-2.59069	-0.49064	1930.18	1931.73					-2.59069	-0.0102302	1724.53	1722.9					-2.59069	-0.393613	1768.34	1770.05					-2.59069	-0.23422	1800.15	1801.06
-2.53943	0.021384	1984.99	1985.57					-2.53943	-0.45394	1930.36	1931.8					-2.53943	-0.26856	1724.69	1724.56					-2.53943	-0.352553	1767.71	1769.24					-2.53943	-0.10416	1799.79	1800.19
-2.48817	0.323354	1985.46	1984.91					-2.48817	-0.20941	1931.15	1931.82					-2.48817	-0.0549185	1725.07	1725.58					-2.48817	-0.341245	1766.94	1768.42					-2.48817	-0.25236	1798.71	1799.69
-2.43691	0.55589	1985.44	1984.16					-2.43691	-0.13943	1932.21	1932.65					-2.43691	0.0555773	1725.38	1725.25					-2.43691	-0.34057	1766.46	1767.94					-2.43691	-0.25217	1797.76	1798.73
-2.38565	0.160522	1983.82	1983.2					-2.38565	-0.07399	1933.37	1933.61					-2.38565	-0.100012	1725.32	1725.2					-2.38565	-0.25766	1767.24	1768.35					-2.38565	-0.38964	1795.83	1797.34
-2.33438	-0.16194	1983.11	1983.17					-2.33438	0.082009	1933.95	1933.69					-2.33438	-0.111124	1725.42	1725.65					-2.33438	-0.31147	1767.73	1769.08					-2.33438	-0.46014	1795.95	1797.73
-2.28312	-0.0366	1983.06	1983.76					-2.28312	0.041252	1933.16	1933.03					-2.28312	0.147763	1725.8	1725.79					-2.28312	-0.397165	1768.14	1769.87					-2.28312	-0.39654	1798.28	1799.82
-2.23186	-0.06888	1981.89	1983.21					-2.23186	-0.39524	1931.25	1932.5					-2.23186	-0.100354	1725.49	1725.31					-2.23186	-0.217426	1769.89	1770.83					-2.23186	-0.61433	1799.42	1801.81
-2.1806	-0.10769	1980.76	1982.17					-2.1806	-0.86257	1930.05	1932.77					-2.1806	-0.499346	1725.29	1725.83					-2.1806	-0.0889276	1771.41	1771.79					-2.1806	-0.88961	1799.1	1802.55
-2.12934	0.077313	1980.52	1981.2					-2.12934	-0.87359	1930.17	1932.93					-2.12934	-0.174043	1726.05	1726.95					-2.12934	-0.233171	1771.47	1772.49					-2.12934	-0.81191	1799.21	1802.36
-2.07808	0.098117	1980.04	1980.21					-2.07808	-0.76307	1930.42	1932.83					-2.07808	0.140927	1726.44	1726.63					-2.07808	-0.316107	1770.74	1772.12					-2.07808	-0.58106	1799.95	1802.2
-2.02681	0.022052	1979.93	1979.65					-2.02681	-0.83073	1930.58	1933.2					-2.02681	0.153388	1726.28	1725.98					-2.02681	-0.210001	1770.56	1771.47					-2.02681	-0.43156	1800.6	1802.28
-1.97555	0.066754	1980.33	1979.84					-1.97555	-0.68191	1931.32	1933.48					-1.97555	0.0408468	1725.73	1725.77					-1.97555	-0.0881224	1771.09	1771.47					-1.97555	-0.19726	1801.16	1801.92
-1.92429	0.155396	1980.08	1980.06					-1.92429	-0.44602	1932.01	1933.42					-1.92429	-0.155732	1725.07	1725.6					-1.92429	-0.114121	1771.09	1771.59					-1.92429	-0.0345	1801.12	1801.26
-1.87303	0.213091	1979.73	1979.45					-1.87303	-0.3537	1932.41	1933.53					-1.87303	0.169952	1725.86	1725.59					-1.87303	-0.375177	1770.62	1772.25					-1.87303	0.176108	1800.7	1800.02
-1.82177	0.31043	1980.22	1978.87					-1.82177	-0.43037	1932.22	1933.58					-1.82177	0.686243	1727.07	1725.29					-1.82177	-0.551499	1770.76	1773.16					-1.82177	0.603349	1801.11	1798.78
-1.7705	0.279097	1980.85	1978.97					-1.7705	-0.66657	1931.4	1933.51					-1.7705	0.610828	1727.02	1724.79					-1.7705	-0.551604	1770.96	1773.36					-1.7705	0.72848	1801.8	1798.98
-1.71924	-0.03449	1980.58	1979.73					-1.71924	-0.80685	1931.27	1933.82					-1.71924	0.460373	1726.83	1725					-1.71924	-0.443691	1770.02	1771.95					-1.71924	0.442798	1801.33	1799.61
-1.66798	-0.28647	1980.19	1980.72					-1.66798	-0.77212	1931.27	1933.71					-1.66798	0.450335	1726.67	1725.3					-1.66798	-0.171354	1768.52	1769.27					-1.66798	0.215615	1800.25	1799.42
-1.61672	-0.2019	1981.08	1981.34					-1.61672	-0.55359	1930.95	1932.7					-1.61672	0.322882	1725.93	1725.17					-1.61672	-0.0178259	1767.36	1767.44					-1.61672	0.378896	1799.91	1798.45
-1.56546	-0.1773	1982.47	1981.89					-1.56546	-0.34531	1930.46	1931.56					-1.56546	0.302062	1725.01	1724.86					-1.56546	-0.0205683	1766.46	1766.54					-1.56546	0.708894	1800.71	1797.97
-1.5142	-0.23557	1983.65	1983.18					-1.5142	-0.266	1929.22	1930.06					-1.5142	0.0862478	1724.07	1724					-1.5142	-0.0124413	1765.63	1765.69					-1.5142	0.704758	1801.45	1798.72
-1.46293	-0.07413	1984.69	1984.6					-1.46293	-0.28852	1928.1	1929.01					-1.46293	-0.0605599	1724.42	1723.79					-1.46293	-0.082084	1765.14	1765.5					-1.46293	0.351677	1800.67	1799.3
-1.41167	-0.20305	1984.53	1984.99					-1.41167	-0.41913	1928.42	1929.74					-1.41167	0.266471	1725.8	1724.62					-1.41167	-0.260281	1765.19	1766.32					-1.41167	0.133437	1799.45	1798.94
-1.36041	-0.66285	1983.88	1985.35					-1.36041	-0.76087	1928.91	1931.32					-1.36041	0.323986	1725.78	1724.92					-1.36041	-0.485951	1765.05	1767.15					-1.36041	0.167256	1798.95	1798.3
-1.30915	-0.58529	1984.52	1986.55					-1.30915	-1.15797	1928.83	1932.49					-1.30915	0.0721556	1725.11	1724.71					-1.30915	-0.581376	1764.61	1767.13					-1.30915	0.254395	1797.61	1796.63
-1.25789	-0.17078	1985.07	1986.88					-1.25789	-1.19556	1929.21	1932.99					-1.25789	-0.0909844	1725.12	1724.87					-1.25789	-0.440585	1764.29	1766.2					-1.25789	0.172268	1796.32	1795.66
-1.20662	-0.22178	1984.07	1985.76					-1.20662	-0.99734	1929.85	1933					-1.20662	-0.120168	1725.32	1725.42					-1.20662	-0.403841	1763.28	1765.03					-1.20662	-0.22292	1797.27	1798.14
-1.15536	-0.51205	1983.52	1984.97					-1.15536	-0.85562	1930.31	1933.02					-1.15536	0.0412597	1725.45	1725.72					-1.15536	-0.608511	1762.15	1764.79					-1.15536	-0.36722	1798.89	1800.31
-1.1041	-0.43275	1983.99	1985.59					-1.1041	-0.88249	1930.33	1933.12					-1.1041	0.0200276	1725.03	1725.31					-1.1041	-0.643911	1762.43	1765.22					-1.1041	-0.38476	1799.43	1800.92
-1.05284	-0.12708	1984.2	1985.73					-1.05284	-1.02632	1930.11	1933.35					-1.05284	-0.167102	1724.7	1724.97					-1.05284	-0.522652	1763.3	1765.57					-1.05284	-0.55588	1799.69	1801.85
-1.00158	-0.16111	1984.39	1984.72					-1.00158	-0.83115	1930.65	1933.28					-1.00158	-0.116657	1725.11	1725.26					-1.00158	-0.570409	1763.37	1765.84					-1.00158	-0.52427	1800.37	1802.41
-0.950315	-0.33245	1984.65	1985.04					-0.950315	-0.51442	1931.12	1932.74					-0.950315	0.0226888	1725.42	1725.5					-0.950315	-0.631051	1763.21	1765.95					-0.950315	-0.54723	1800.6	1802.73
-0.899054	-0.26875	1984.25	1985.99					-0.899054	-0.76067	1930.4	1932.81					-0.899054	0.143689	1725.36	1725.35					-0.899054	-0.449521	1763.62	1765.57					-0.899054	-0.6451	1800.35	1802.86
-0.847792	-0.26763	1983.16	1985.33					-0.847792	-0.8682	1930.28	1933.02					-0.847792	0.176004	1725.02	1724.88					-0.847792	-0.300146	1763.76	1765.06					-0.847792	-0.47372	1800.41	1802.25
-0.79653	-0.33229	1982.01	1984.23					-0.79653	-0.45126	1931.46	1932.88					-0.79653	0.276044	1724.85	1724.44					-0.79653	-0.385961	1763.4	1765.07					-0.79653	-0.23441	1800.47	1801.38
-0.745268	-0.49335	1980.75	1983.34					-0.745268	-0.16243	1932.55	1933.06					-0.745268	0.766935	1725.15	1723.93					-0.745268	-0.442441	1762.98	1764.89					-0.745268	-0.31529	1800.16	1801.39
-0.694006	-0.63622	1980.15	1982.74					-0.694006	0.015897	1933.06	1933.01					-0.694006	0.998689	1725.08	1722.61					-0.694006	-0.569955	1762.44	1764.91					-0.694006	-0.37971	1800.18	1801.66
-0.642744	-0.51282	1980.25	1982.71					-0.642744	0.342472	1933.57	1932.48					-0.642744	0.63254	1724.52	1721.77					-0.642744	-0.761403	1762.21	1765.51					-0.642744	-0.10899	1800.29	1800.72
-0.591483	-0.6287	1980.27	1982.31					-0.591483	0.478766	1933.9	1932.39					-0.591483	0.356262	1724.27	1722.42					-0.591483	-0.814327	1762.54	1766.07					-0.591483	-0.07069	1799.66	1799.93
-0.540221	-0.72029	1981.56	1982.8					-0.540221	0.39427	1933.69	1932.45					-0.540221	0.350271	1724.36	1723.09					-0.540221	-0.822099	1762.74	1766.3					-0.540221	-0.46904	1798.58	1800.4
-0.488959	-0.51069	1983.33	1984.46					-0.488959	0.539712	1933.95	1932.25					-0.488959	0.605782	1724.81	1723.2					-0.488959	-0.751608	1762.85	1766.11					-0.488959	-0.63005	1798.15	1800.6
-0.437697	-0.36729	1984.09	1985.38					-0.437697	0.666406	1934.58	1932.47					-0.437697	0.875931	1725.16	1722.8					-0.437697	-0.654782	1763.61	1766.45					-0.437697	-0.48067	1798.61	1800.48
-0.386435	-0.38889	1984.64	1985.57					-0.386435	0.554489	1934.82	1933.07					-0.386435	0.765302	1724.84	1722.25					-0.386435	-0.467734	1764.35	1766.38					-0.386435	-0.29288	1799.45	1800.59
-0.335174	-0.37793	1984.77	1986.21					-0.335174	0.600117	1935.27	1933.38					-0.335174	0.579312	1724.32	1722.3					-0.335174	-0.119507	1763.36	1763.87					-0.335174	0.042558	1800.3	1800.14
-0.283912	0.031063	1984.67	1986.29					-0.283912	0.746358	1935.77	1933.41					-0.283912	0.336216	1723.69	1722.4					-0.283912	-0.255073	1760.9	1762					-0.283912	0.348489	1800.21	1798.86
-0.23265	0.493808	1984.58	1984.54					-0.23265	0.589712	1935.09	1933.23					-0.23265	0.137592	1723.58	1722.58					-0.23265	-0.82701	1760.94	1764.53					-0.23265	0.124073	1798.52	1798.05
-0.181388	0.598838	1983.91	1982.6					-0.181388	0.28066	1933.8	1932.92					-0.181388	0.474937	1724.56	1723.13					-0.181388	-1.00222	1763.72	1768.07					-0.181388	-0.48354	1796.85	1798.73
-0.130126	0.526803	1983.86	1981.5					-0.130126	0.208394	1933.28	1932.62					-0.130126	0.97232	1725.44	1722.98					-0.130126	-0.979976	1765.23	1769.49					-0.130126	-0.60294	1797.61	1799.95
-0.0788644	0.331538	1984.75	1981.74					-0.0788644	0.303749	1933.54	1932.58					-0.0788644	0.937928	1725.28	1722.21					-0.0788644	-0.969475	1765.88	1770.1					-0.0788644	-0.40379	1799.53	1801.09
-0.0276025	0.067568	1985.3	1983.42					-0.0276025	0.370602	1934.06	1932.88					-0.0276025	0.535657	1725.14	1722.17					-0.0276025	-0.79368	1766.92	1770.37					-0.0276025	-0.32229	1800.5	1801.75
0.0236593	-0.03998	1985.79	1985.03					0.0236593	0.340047	1934.2	1933.12					0.0236593	0.328437	1725.14	1723.36					0.0236593	-0.690789	1767.36	1770.36					0.0236593	-0.18567	1800.81	1801.53
0.0749211	0.196648	1987.31	1985.96					0.0749211	0.033881	1933.4	1933.29					0.0749211	0.526199	1725.23	1724.05					0.0749211	-0.492009	1768.11	1770.24					0.0749211	0.094985	1801.85	1801.48
0.126183	0.816067	1989.71	1986.52					0.126183	-0.29048	1932.31	1933.23					0.126183	1.12812	1727.22	1723.49					0.126183	0.170957	1771.35	1770.61					0.126183	0.707603	1804.83	1802.08
0.177445	1.52041	1992.32	1986.42					0.177445	-0.23698	1932.15	1932.9					0.177445	1.76972	1729.45	1723.47					0.177445	1.09953	1775.72	1770.94					0.177445	1.5413	1809.13	1803.14
0.228707	2.23966	1994.66	1986.19					0.228707	-0.27451	1931.85	1932.72					0.228707	1.85588	1729.47	1723.57					0.228707	1.82098	1778.63	1770.72					0.228707	2.30913	1813.22	1804.24
0.279968	2.45491	1994.69	1985.64					0.279968	-0.33358	1931.63	1932.69					0.279968	1.72244	1729.11	1723.31					0.279968	2.18047	1780.84	1771.36					0.279968	2.64617	1815.25	1804.96
0.33123	1.96061	1993.37	1984.81					0.33123	-0.00029	1932.35	1932.35					0.33123	1.84384	1729.29	1723.4					0.33123	2.38534	1782.27	1771.9					0.33123	2.87801	1816.05	1804.86
0.382492	1.86376	1993.55	1985.48					0.382492	-0.00034	1932.08	1932.08					0.382492	1.99181	1729.36	1723.17					0.382492	2.48918	1781.97	1771.15					0.382492	3.57056	1817.75	1803.88
0.433754	1.91189	1993.48	1986.04					0.433754	-0.2228	1931.37	1932.08					0.433754	2.22058	1730.04	1722.75					0.433754	2.31401	1780.5	1770.44					0.433754	3.831	1819.42	1804.52
0.485016	1.54505	1992.47	1985.77					0.485016	-0.14029	1931.63	1932.07					0.485016	2.418	1730.72	1722.67					0.485016	1.94728	1778.6	1770.14					0.485016	3.55225	1820.01	1806.19
0.536278	1.34506	1991.61	1986.24					0.536278	-0.21381	1931.8	1932.48					0.536278	2.29077	1730.1	1722.7					0.536278	1.5769	1776.96	1770.11					0.536278	3.31615	1819.66	1806.75
0.587539	1.31771	1990.84	1986.19					0.587539	-0.40944	1931.48	1932.78					0.587539	2.07437	1729.46	1722.5					0.587539	1.33107	1776.43	1770.64					0.587539	2.95716	1818.9	1807.38
0.638801	1.21217	1990.49	1985.53					0.638801	-0.49273	1931.18	1932.73					0.638801	2.30975	1730.8	1722.58					0.638801	1.45014	1777.16	1770.86					0.638801	2.83903	1818.18	1807.12
0.690063	1.10428	1990	1985.6					0.690063	-0.64215	1930.71	1932.74					0.690063	2.51085	1732	1723.14					0.690063	1.52716	1777.32	1770.68					0.690063	2.79427	1816.75	1805.88
0.741325	0.935937	1988.83	1985.55					0.741325	-0.97201	1930.02	1933.1					0.741325	2.21443	1731.36	1723.66					0.741325	1.21239	1776.34	1771.07					0.741325	2.37121	1814.75	1805.52
0.792587	0.742343	1987.89	1985.06					0.792587	-1.10946	1929.91	1933.42					0.792587	2.16273	1731.37	1724.01					0.792587	0.991272	1775.8	1771.49					0.792587	2.02647	1813.94	1806.05
0.843849	0.7131	1987.59	1984.9					0.843849	-0.61823	1930.69	1932.65					0.843849	2.20267	1731.53	1724.18					0.843849	0.977198	1775.29	1771.04					0.843849	1.90444	1814.08	1806.66
0.89511	0.720576	1987.54	1984.71					0.89511	-0.21508	1931.15	1931.83					0.89511	1.89893	1730.52	1724.22					0.89511	0.906718	1774.31	1770.37					0.89511	2.0329	1813.54	1805.63
0.946372	0.597453	1987.08	1984.64					0.946372	-0.43036	1930.55	1931.91					0.946372	1.37876	1729.23	1724.21					0.946372	0.902788	1774.01	1770.09					0.946372	2.38585	1813.09	1803.82
0.997634	0.475156	1985.81	1984.67					0.997634	-0.4698	1930.6	1932.08					0.997634	0.936963	1728.31	1724.65					0.997634	0.957695	1774.24	1770.08					0.997634	2.653	1812.54	1802.23
1.0489	0.399712	1985.09	1983.9					1.0489	-0.29613	1931.08	1932.01					1.0489	0.859205	1727.99	1725.19					1.0489	0.771311	1774.21	1770.86					1.0489	2.75658	1810.36	1799.67
1.10016	0.438342	1985.6	1983.48					1.10016	-0.41118	1930.96	1932.26					1.10016	1.0484	1728.27	1725.14					1.10016	0.434411	1774.04	1772.15					1.10016	2.33101	1807.61	1798.57
1.15142	0.635453	1986.47	1983.84					1.15142	-0.46531	1931.04	1932.51					1.15142	0.979606	1728.4	1724.78					1.15142	0.173378	1774.05	1773.29					1.15142	1.54102	1806.01	1800.03
1.20268	0.497443	1986.34	1983.91					1.20268	-0.31212	1930.97	1931.96					1.20268	0.599078	1727.68	1725.15					1.20268	0.109629	1774.22	1773.74					1.20268	1.0919	1805.85	1801.62
1.25394	0.197156	1985.26	1984.34					1.25394	-0.38146	1930.26	1931.47					1.25394	0.514197	1727.14	1725.69					1.25394	0.157751	1773.93	1773.25					1.25394	0.947261	1806.05	1802.37
1.30521	0.135806	1984.73	1984.46					1.30521	-0.61337	1929.38	1931.31					1.30521	0.592858	1726.88	1725.44					1.30521	0.128257	1773.67	1773.11					1.30521	0.661256	1805.74	1803.17
1.35647	0.060455	1984.75	1984.19					1.35647	-0.67056	1928.93	1931.05					1.35647	0.648498	1726.63	1724.91					1.35647	0.119006	1773.81	1773.29					1.35647	0.174066	1805.07	1804.39
1.40773	-0.05363	1984.69	1984.51					1.40773	-0.80249	1928.89	1931.42					1.40773	0.717414	1726.59	1724.47					1.40773	0.141057	1773.3	1772.68					1.40773	-0.2766	1804.79	1805.86
1.45899	-0.14494	1984.39	1984.91					1.45899	-0.86182	1929.29	1932.02					1.45899	0.570388	1725.74	1724.21					1.45899	-0.0068907	1772.52	1772.55					1.45899	-0.34331	1805.48	1806.82
1.51025	-0.13361	1984.55	1984.98					1.51025	-0.74904	1929.56	1931.92					1.51025	0.484695	1724.91	1723.84					1.51025	-0.180232	1772.59	1773.37					1.51025	0.217786	1807.06	1806.22
1.56151	0.032778	1985.41	1985.08					1.56151	-0.70765	1929.52	1931.75					1.56151	0.480005	1725.37	1723.3					1.56151	-0.0530368	1773.17	1773.4					1.56151	0.977017	1809.12	1805.32
1.61278	0.262124	1985.93	1985.28					1.61278	-0.64207	1929.81	1931.84					1.61278	0.305153	1726.14	1723.77					1.61278	-0.0650372	1773.26	1773.55					1.61278	1.29999	1809.98	1804.93
1.66404	0.188778	1985.66	1984.87					1.66404	-0.60868	1929.76	1931.68					1.66404	0.269913	1726.31	1725.13					1.66404	-0.144787	1773.76	1774.39					1.66404	0.968857	1808.55	1804.78
1.7153	-0.1513	1984.89	1984.9					1.7153	-0.63258	1929.34	1931.33					1.7153	0.293136	1725.97	1725.41					1.7153	-0.0627502	1774.18	1774.46					1.7153	0.472037	1806.85	1805.01
1.76656	-0.10811	1984.64	1985.5					1.76656	-0.6038	1929.08	1930.98					1.76656	0.139421	1725.41	1724.99					1.76656	-0.33593	1772.62	1774.08					1.76656	0.111072	1806.11	1805.68
1.81782	0.037258	1984.69	1985.08					1.81782	-0.68859	1928.54	1930.72					1.81782	-0.0627549	1724.87	1724.95					1.81782	-0.630509	1771.34	1774.08					1.81782	-0.18024	1805.48	1806.18
1.86909	-0.26424	1983.91	1984.55					1.86909	-0.86364	1927.72	1930.45					1.86909	-0.220953	1725.02	1725.08					1.86909	-0.591113	1771.7	1774.27					1.86909	-0.11278	1805.59	1806.03
1.92035	-0.36532	1983.52	1984.98					1.92035	-0.72942	1927.38	1929.68					1.92035	-0.240514	1725.65	1725.76					1.92035	-0.386081	1772.02	1773.7					1.92035	0.089763	1806.03	1805.68
1.97161	-0.07833	1983.51	1985					1.97161	-0.39384	1928.15	1929.39					1.97161	-0.143438	1725.79	1726.45					1.97161	-0.273385	1772.01	1773.2					1.97161	0.095665	1805.8	1805.42
2.02287	0.088406	1982.96	1983.82					2.02287	-0.23185	1929.51	1930.24					2.02287	0.0496388	1726.13	1726.27					2.02287	-0.351039	1772.36	1773.89					2.02287	0.040413	1805.59	1805.43
2.07413	-0.04698	1982.74	1982.6					2.07413	-0.42243	1930.01	1931.34					2.07413	0.153778	1726.44	1725.96					2.07413	-0.348872	1773.03	1774.55					2.07413	0.042095	1805.45	1805.28
2.12539	-0.46842	1982.67	1982.93					2.12539	-0.62647	1929.95	1931.93					2.12539	0.206931	1726.29	1725.93					2.12539	-0.312861	1773.21	1774.57					2.12539	0.058008	1805.4	1805.18
2.17666	-0.56859	1982.96	1984.56					2.17666	-0.58756	1930.18	1932.04					2.17666	0.5318	1726.45	1725.61					2.17666	-0.335258	1772.57	1774.03					2.17666	-0.00888	1805.4	1805.44
2.22792	-0.4047	1983.7	1985.25					2.22792	-0.5308	1930.62	1932.3					2.22792	0.58038	1726.35	1724.68					2.22792	-0.346422	1771.86	1773.36					2.22792	-0.11535	1804.73	1805.18
2.27918	-0.36474	1984.34	1985.34					2.27918	-0.52474	1931.16	1932.82					2.27918	0.229027	1726.06	1724.42					2.27918	-0.404072	1771.58	1773.34					2.27918	-0.26895	1803.87	1804.92
2.33044	-0.21683	1985.14	1985.81					2.33044	-0.60788	1931.21	1933.13					2.33044	0.350529	1726.77	1725.3					2.33044	-0.408048	1771.82	1773.6					2.33044	-0.35831	1803.88	1805.28
2.3817	-0.05621	1985.53	1986.02					2.3817	-0.51699	1930.94	1932.57					2.3817	0.788556	1727.59	1725.61					2.3817	-0.3209	1772.37	1773.76					2.3817	-0.34049	1804.18	1805.51
2.43297	-0.02919	1985.41	1985.75					2.43297	-0.51312	1930.19	1931.81					2.43297	0.857064	1727.54	1724.97					2.43297	-0.213647	1772.43	1773.36					2.43297	-0.34675	1803.81	1805.16
2.48423	-0.02506	1985.3	1985.52					2.48423	-0.73919	1929.37	1931.7					2.48423	0.663794	1727.55	1724.7					2.48423	-0.195036	1772.17	1773.02					2.48423	-0.34037	1802.99	1804.32
2.53549	-0.08554	1984.84	1985.4					2.53549	-0.53386	1929.9	1931.59					2.53549	0.375696	1727.34	1725.34					2.53549	-0.147468	1772.46	1773.1					2.53549	-0.27999	1802.63	1803.72
2.58675	-0.29175	1984.01	1985.18					2.58675	-0.21783	1930.78	1931.47					2.58675	0.13972	1726.81	1726.09					2.58675	0.146897	1773.16	1772.52					2.58675	-0.28632	1802.74	1803.86
2.63801	-0.33588	1983.36	1985.18					2.63801	-0.22774	1931.26	1931.98					2.63801	0.191829	1726.96	1726.35					2.63801	0.212024	1773.11	1772.19					2.63801	-0.42856	1802.53	1804.19
2.68927	-0.12849	1983.66	1984.71					2.68927	-0.29021	1931.68	1932.6					2.68927	0.318679	1727.45	1726.32					2.68927	-0.192664	1772.06	1772.89					2.68927	-0.47735	1802.48	1804.34
2.74054	-0.1016	1984.12	1984.18					2.74054	-0.27763	1931.77	1932.64					2.74054	0.31927	1727.46	1726.39					2.74054	-0.378053	1771.43	1773.07					2.74054	-0.35822	1802.91	1804.3
2.7918	-0.31315	1983.67	1984.53					2.7918	-0.43646	1931.35	1932.73					2.7918	0.317658	1727.34	1726.4					2.7918	-0.269978	1771.74	1772.92					2.7918	-0.42436	1803.03	1804.68
2.84306	-0.45005	1983.35	1984.93					2.84306	-0.65473	1930.89	1932.95					2.84306	0.463805	1727.76	1726.28					2.84306	-0.413504	1771.68	1773.48					2.84306	-0.54	1802.88	1804.98
2.89432	-0.54588	1983.41	1985.16					2.89432	-0.6522	1930.97	1933.03					2.89432	0.870945	1728.56	1726.22					2.89432	-0.596696	1770.94	1773.54					2.89432	-0.50014	1802.56	1804.5
2.94558	-0.58914	1983.41	1985.61					2.94558	-0.52575	1931.36	1933.02					2.94558	1.05383	1728.49	1725.67					2.94558	-0.609115	1770.35	1773.01					2.94558	-0.5975	1802.14	1804.46
2.99685	-0.48594	1983.58	1985.78					2.99685	-0.32921	1931.67	1932.71					2.99685	0.636419	1727.42	1724.99					2.99685	-0.493627	1770.79	1772.94					2.99685	-0.79402	1801.88	1804.97
3.04811	-0.48956	1983.6	1985.54					3.04811	-0.02182	1932.42	1932.49					3.04811	0.24439	1726.72	1725.3					3.04811	-0.37261	1771.64	1773.26					3.04811	-1.08198	1801.18	1805.39
3.09937	-0.4781	1983.88	1985.57					3.09937	0.469695	1933.55	1932.06					3.09937	0.360922	1726.33	1725.91					3.09937	-0.365866	1771.65	1773.24					3.09937	-1.33226	1800.19	1805.37
3.15063	-0.30652	1984.36	1985.81					3.15063	0.634735	1933.38	1931.37					3.15063	0.715828	1725.78	1725.13					3.15063	-0.328721	1771.48	1772.91					3.15063	-1.45274	1800.1	1805.75
3.20189	-0.11639	1984.48	1985.6					3.20189	0.247486	1932.25	1931.47					3.20189	0.490419	1724.84	1723.4					3.20189	-0.42324	1771.19	1773.04					3.20189	-1.39364	1800.88	1806.31
3.25315	-0.00057	1984.56	1984.95					3.25315	-0.0866	1931.46	1931.73					3.25315	0.0590566	1724.05	1723.22					3.25315	-0.625674	1770.46	1773.19					3.25315	-1.1078	1801.47	1805.78
3.30442	-0.24396	1984.1	1984.56					3.30442	-0.26627	1930.93	1931.77					3.30442	0.426564	1725.16	1723.85					3.30442	-0.634566	1770.22	1772.99					3.30442	-1.07117	1801.88	1806.05
3.35568	-0.38144	1983.63	1985.08					3.35568	-0.39924	1930.74	1932					3.35568	0.818555	1727.21	1723.75					3.35568	-0.582395	1770.66	1773.19					3.35568	-1.12577	1802.04	1806.42
3.40694	-0.23252	1983.55	1985.17					3.40694	-0.49621	1930.34	1931.91					3.40694	0.77941	1727.87	1724.49					3.40694	-0.767181	1770.71	1774.05					3.40694	-0.98654	1802	1805.84
3.4582	-0.35567	1983.36	1984.48					3.4582	-0.66408	1929.68	1931.78					3.4582	0.742366	1727.67	1725.28					3.4582	-1.01641	1770.11	1774.54					3.4582	-0.86135	1802.55	1805.9
3.50946	-0.46947	1983.53	1984.79					3.50946	-0.80326	1929.34	1931.88					3.50946	0.652215	1727.33	1725.21					3.50946	-0.924298	1769.88	1773.9					3.50946	-0.72733	1803.24	1806.07
3.56073	-0.46385	1983.34	1985.42					3.56073	-0.86998	1929.15	1931.9					3.56073	0.402649	1726.35	1725.17					3.56073	-0.594938	1770.47	1773.06					3.56073	-0.68607	1803.03	1805.69
3.61199	-0.55209	1982.74	1985.2					3.61199	-0.87121	1929.03	1931.78					3.61199	-0.071013	1724.81	1725.02					3.61199	-0.405582	1771.31	1773.07					3.61199	-0.77603	1801.75	1804.77
3.66325	-0.65263	1982.65	1984.97					3.66325	-0.72636	1929.45	1931.74					3.66325	-0.34013	1724.24	1725.05					3.66325	-0.339595	1771.82	1773.29					3.66325	-0.9242	1800.22	1803.81
3.71451	-0.74224	1982.53	1985.28					3.71451	-0.59398	1930.16	1932.03					3.71451	-0.218866	1724.77	1725.37					3.71451	-0.293621	1771.53	1772.81					3.71451	-0.95456	1799.67	1803.38
3.76577	-0.87826	1982.18	1985.52					3.76577	-0.61836	1930.38	1932.33					3.76577	-0.29178	1724.73	1725.5					3.76577	-0.391299	1770.81	1772.51					3.76577	-0.6698	1801.21	1803.82
3.81703	-0.94502	1982.37	1985.72					3.81703	-0.7681	1929.72	1932.14					3.81703	-0.464332	1724.5	1725.7					3.81703	-0.447287	1771.2	1773.14					3.81703	-0.26026	1803.7	1804.71
3.8683	-0.70661	1983.09	1986.18					3.8683	-0.93164	1928.91	1931.85					3.8683	-0.361176	1725.04	1726.04					3.8683	-0.120526	1773.26	1773.78					3.8683	-0.01747	1804.64	1804.71
3.91956	-0.48844	1983.18	1985.93					3.91956	-0.93573	1928.97	1931.93					3.91956	-0.235827	1725.58	1726.24					3.91956	0.462588	1775.89	1773.88					3.91956	-0.02951	1804.13	1804.25
3.97082	-0.56009	1982.5	1985.15					3.97082	-0.85959	1929.02	1931.73					3.97082	-0.149683	1726.01	1726.37					3.97082	1.09714	1778.75	1773.97					3.97082	0.004218	1804.17	1804.16
4.02208	-0.718	1982.2	1984.76					4.02208	-0.88591	1928.84	1931.64					4.02208	-0.0032827	1726.2	1726.51					4.02208	1.77216	1781.84	1774.12					4.02208	0.036017	1804.45	1804.31
4.07334	-0.8398	1982.46	1985.09					4.07334	-0.94378	1929.15	1932.13					4.07334	-0.0899795	1725.71	1726.21					4.07334	2.08042	1783	1773.94					4.07334	0.012023	1804.79	1804.74
4.12461	-0.80546	1983.3	1985.84					4.12461	-0.98518	1929.4	1932.52					4.12461	-0.296458	1725.83	1726					4.12461	1.69176	1781.09	1773.73					4.12461	0.064155	1805.1	1804.85
4.17587	-0.87023	1983.89	1986.54					4.17587	-1.03181	1929.12	1932.38					4.17587	-0.0089644	1726.63	1726.82					4.17587	1.07643	1778.3	1773.61					4.17587	-0.14533	1803.99	1804.55
4.22713	-1.1715	1983.21	1987.4					4.22713	-0.94244	1928.68	1931.66					4.22713	0.434495	1726.38	1726.66					4.22713	0.662164	1776.12	1773.24					4.22713	-0.47773	1802.84	1804.7
4.27839	-1.16844	1982.75	1987.93					4.27839	-0.75572	1928.77	1931.16					4.27839	0.375913	1725.49	1724.93					4.27839	0.410366	1774.75	1772.96					4.27839	-0.48903	1802.95	1804.85
4.32965	-0.87869	1983.03	1987.46					4.32965	-0.56905	1929.48	1931.28					4.32965	0.109946	1725.69	1724.24					4.32965	0.343336	1774.75	1773.25					4.32965	-0.32428	1803.81	1805.07
4.38091	-0.60675	1983.74	1986.57					4.38091	-0.51784	1929.57	1931.2					4.38091	-0.149276	1726.11	1725.32					4.38091	0.28352	1774.61	1773.37					4.38091	-0.41197	1804.24	1805.84
4.43218	-0.43936	1984.21	1986.19					4.43218	-0.63192	1928.74	1930.73					4.43218	-0.242618	1725.87	1726.6					4.43218	0.0880524	1773.4	1773.02					4.43218	-0.71728	1803.41	1806.2
4.48344	-0.42538	1983.61	1985.98					4.48344	-0.6794	1928.41	1930.55					4.48344	-0.0509431	1725.79	1726.68					4.48344	0.0258366	1773.2	1773.09					4.48344	-0.75078	1802.74	1805.67
4.5347	-0.55178	1983.3	1985.33					4.5347	-0.58318	1928.91	1930.75					4.5347	0.0707238	1725.78	1725.96					4.5347	0.116057	1773.68	1773.17					4.5347	-0.63844	1802.42	1804.9
4.58596	-0.93571	1983.09	1985.52					4.58596	-0.70549	1929.61	1931.83					4.58596	0.0440595	1726.04	1725.54					4.58596	0.0369723	1773.18	1773.02					4.58596	-0.57104	1801.88	1804.1
4.63722	-0.95666	1982.92	1986.86					4.63722	-0.91365	1930.04	1932.93					4.63722	-0.0044169	1726.47	1725.9					4.63722	-0.0750921	1772.65	1772.97					4.63722	-0.57049	1801.21	1803.43
4.68849	-0.65959	1983.09	1986.78					4.68849	-0.78522	1930.25	1932.73					4.68849	0.132763	1726.69	1726.48					4.68849	-0.151999	1772.1	1772.77					4.68849	-0.79861	1800.59	1803.7
4.73975	-0.88805	1982.56	1985.74					4.73975	-0.67992	1930.41	1932.56					4.73975	0.403629	1727.02	1726.25					4.73975	-0.328164	1771.12	1772.55					4.73975	-0.70047	1800.75	1803.47
4.79101	-1.18388	1982.23	1986.14					4.79101	-0.58104	1931.18	1933.01					4.79101	0.368273	1726.82	1725.68					4.79101	-0.263712	1770.55	1771.69					4.79101	-0.48191	1800.76	1802.63
4.84227	-1.18255	1982.35	1987					4.84227	-0.36214	1932.15	1933.29					4.84227	0.146267	1726.59	1725.59					4.84227	-0.192593	1770.05	1770.89					4.84227	-0.61562	1800.34	1802.74
4.89353	-1.1969	1982.34	1987.11					4.89353	0.026679	1932.82	1932.74					4.89353	0.184121	1727.19	1726.1					4.89353	-0.423173	1769.84	1771.68					4.89353	-0.70778	1800.08	1802.83
4.94479	-1.16921	1982.77	1987.16					4.94479	0.525267	1933.63	1931.97					4.94479	0.224693	1727.02	1726.58					4.94479	-0.535999	1770.65	1772.98					4.94479	-0.76244	1800.04	1803.01
4.99606	-1.02918	1983.3	1987.48					4.99606	0.513579	1933.71	1932.09					4.99606	0.00778654	1725.93	1726.28					4.99606	-0.4153	1771.74	1773.55					4.99606	-0.74538	1800.57	1803.46
5.04732	-0.97737	1982.93	1987.45					5.04732	0.265158	1933.2	1932.37					5.04732	-0.166765	1725.17	1725.9					5.04732	-0.364833	1772.08	1773.67					5.04732	-0.49091	1801.13	1803.04
5.09858	-0.94222	1982.11	1986.87					5.09858	0.388164	1933.34	1932.11					5.09858	-0.296504	1724.85	1725.73					5.09858	-0.432192	1771.73	1773.61					5.09858	-0.18974	1801.39	1802.12
5.14984	-0.88328	1982.1	1985.91					5.14984	0.510399	1933.54	1931.93					5.14984	-0.282167	1724.87	1725.83					5.14984	-0.5165	1771.09	1773.33					5.14984	-0.10014	1801.12	1801.51
5.2011	-1.00291	1982.75	1985.66					5.2011	0.213104	1932.71	1932.03					5.2011	-0.315264	1724.29	1725.81					5.2011	-0.652541	1770.63	1773.47					5.2011	-0.28712	1800.8	1801.92
5.25237	-1.11126	1982.82	1986.79					5.25237	-0.18409	1931.5	1932.08					5.25237	-0.525045	1723.33	1725.34					5.25237	-0.720007	1770.82	1773.96					5.25237	-0.4633	1801.05	1802.85
5.30363	-1.0551	1982.42	1987.3					5.30363	-0.24424	1930.75	1931.52					5.30363	-0.616978	1723.38	1725.08					5.30363	-0.649359	1771.2	1774.03					5.30363	-0.51217	1800.9	1802.89
5.35489	-0.87178	1982.65	1986.67					5.35489	-0.25253	1930.26	1931.05					5.35489	-0.694746	1724.08	1725.43					5.35489	-0.537334	1771.52	1773.86					5.35489	-0.62976	1800.08	1802.53
5.40615	-0.72822	1983.07	1986.16					5.40615	-0.39763	1929.95	1931.21					5.40615	-0.667207	1724.07	1726.4					5.40615	-0.476551	1771.46	1773.53					5.40615	-0.55985	1800.33	1802.51
5.45741	-0.68074	1983.48	1986					5.45741	-0.32934	1930.09	1931.13					5.45741	-0.438698	1723.24	1726.29					5.45741	-0.649941	1770.36	1773.19					5.45741	-0.4559	1800.79	1802.56
5.50868	-0.57698	1984.08	1986.23					5.50868	-0.10476	1930.67	1931					5.50868	-0.2179	1722.1	1724.7					5.50868	-0.734539	1769.09	1772.29					5.50868	-0.5567	1800.04	1802.2
5.55994	-0.61119	1983.94	1986.41					5.55994	0.073142	1931.11	1930.88					5.55994	-0.337438	1721.75	1722.83					5.55994	-0.488085	1768.69	1770.81					5.55994	-0.51549	1800.06	1802.06
5.6112	-0.90485	1983.12	1986.4					5.6112	-0.01489	1931.12	1931.16					5.6112	-0.408265	1723.28	1722.87					5.6112	-0.457042	1769.17	1771.16					5.6112	-0.57563	1800.53	1802.76
5.66246	-1.09741	1982.81	1986.77					5.66246	-0.18292	1931.13	1931.7					5.66246	-0.105431	1724.95	1724.64					5.66246	-0.668321	1770.34	1773.25					5.66246	-0.75371	1799.96	1802.88
5.71372	-0.91053	1983.33	1987.24					5.71372	-0.06698	1931.28	1931.49					5.71372	0.0595843	1725.6	1725.3					5.71372	-0.661769	1771.32	1774.2					5.71372	-0.6342	1799.56	1802.02
5.76498	-0.58051	1983.8	1987					5.76498	-0.2312	1930.84	1931.57					5.76498	-0.0964342	1725.17	1725.41					5.76498	-0.303308	1772.08	1773.41					5.76498	-0.6165	1799.93	1802.32
5.81625	-0.45648	1984.01	1986.14					5.81625	-0.48479	1930.12	1931.65					5.81625	-0.15166	1724.57	1725.49					5.81625	0.181344	1773.41	1772.62					5.81625	-0.93127	1799.61	1803.23
5.86751	-0.52167	1983.95	1985.85					5.86751	-0.26167	1930.39	1931.22					5.86751	-0.0394387	1724.94	1725.08					5.86751	0.293289	1773.93	1772.66					5.86751	-1.1298	1799.15	1803.54
5.91877	-0.6673	1983.45	1986.05					5.91877	-0.31849	1930.36	1931.37					5.91877	0.189147	1724.97	1725.07					5.91877	-0.0196418	1773.05	1773.13					5.91877	-0.8894	1800.67	1804.13
5.97003	-0.94391	1982.69	1986.14					5.97003	-0.51908	1929.65	1931.29					5.97003	0.257843	1723.78	1724.35					5.97003	-0.28545	1772.82	1774.06					5.97003	-0.34172	1802.69	1804.02
6.02129	-1.11129	1981.91	1986.5					6.02129	-0.40226	1929.45	1930.72					6.02129	-0.142643	1722.94	1722.92					6.02129	-0.318124	1773.12	1774.51					6.02129	0.023347	1803.47	1803.38
6.07256	-1.00585	1981.51	1986.39					6.07256	-0.59888	1929.14	1931.03					6.07256	-0.33412	1724.04	1723.42					6.07256	-0.205541	1772.93	1773.82					6.07256	0.10181	1804.18	1803.78
6.12382	-0.95652	1981.34	1985.57					6.12382	-0.79714	1928.95	1931.46					6.12382	-0.117476	1725.49	1725.15					6.12382	-0.092188	1772.77	1773.17					6.12382	0.335402	1805.72	1804.41
6.17508	-0.9733	1981.49	1985.19					6.17508	-0.64343	1929.47	1931.5					6.17508	0.148198	1725.86	1725.88					6.17508	-0.150947	1772.34	1773					6.17508	0.83795	1807.6	1804.34
6.22634	-0.89966	1981.98	1985.41					6.22634	-0.43826	1930.67	1932.05					6.22634	0.208718	1725.86	1725.37					6.22634	-0.263015	1771.53	1772.67					6.22634	0.965854	1808.18	1804.42
6.2776	-0.99136	1982.1	1985.61					6.2776	0.002314	1932.25	1932.24					6.2776	-0.0336313	1725.33	1725.17					6.2776	-0.331938	1771.1	1772.55					6.2776	0.661382	1807.19	1804.62
6.32886	-1.06124	1982.45	1986.09					6.32886	0.369424	1933.09	1931.93					6.32886	-0.172115	1724.74	1725.44					6.32886	-0.427217	1771.07	1772.93					6.32886	0.362931	1806.38	1804.97
6.38013	-0.84686	1983.31	1986.73					6.38013	0.404277	1933.1	1931.82					6.38013	0.0253005	1725.26	1725.31					6.38013	-0.465178	1771.19	1773.22					6.38013	0.218164	1805.97	1805.12
6.43139	-0.6668	1983.46	1986.72					6.43139	0.420259	1933.06	1931.74					6.43139	0.0307035	1725.9	1725.18					6.43139	-0.430497	1771.4	1773.27					6.43139	0.417069	1805.26	1803.64
6.48265	-0.84025	1982.73	1986.15					6.48265	0.318856	1932.61	1931.61					6.48265	-0.318557	1725.77	1725.8					6.48265	-0.425471	1770.89	1772.74					6.48265	0.643645	1804.28	1801.78
6.53391	-1.20968	1981.79	1986.12					6.53391	-0.03024	1931.56	1931.65					6.53391	-0.386337	1725.3	1726.83					6.53391	-0.385298	1769.93	1771.6					6.53391	0.608706	1803.22	1800.86
6.58517	-1.2226	1981.71	1986.67					6.58517	-0.49375	1930.55	1932.11					6.58517	0.0219208	1725.27	1726.58					6.58517	-0.347023	1769.21	1770.72					6.58517	0.469335	1801.72	1799.9
6.63644	-1.03615	1981.88	1986.64					6.63644	-0.71339	1930.15	1932.41					6.63644	0.224768	1725.65	1725.2					6.63644	-0.454513	1768.41	1770.39					6.63644	0.323086	1800.65	1799.4
6.6877	-1.0736	1981.48	1986.06					6.6877	-0.82648	1929.77	1932.38					6.6877	-0.0990428	1725.31	1724.91					6.6877	-0.616353	1768.16	1770.84					6.6877	0.117903	1801.18	1800.72
6.73896	-1.16303	1981.18	1985.81					6.73896	-1.02058	1928.93	1932.15					6.73896	-0.252776	1724.75	1725.64					6.73896	-0.812099	1768.29	1771.82					6.73896	-0.01609	1801.97	1802.04
6.79022	-1.1176	1981.22	1985.87					6.79022	-0.89503	1929.03	1931.86					6.79022	-0.0549398	1725.15	1725.59					6.79022	-0.944132	1768.25	1772.36					6.79022	0.192311	1802.59	1801.85
6.84148	-1.00285	1981.65	1985.72					6.84148	-0.73904	1929.69	1932.03					6.84148	-0.0485298	1725.81	1725.34					6.84148	-0.880181	1768.89	1772.72					6.84148	0.392854	1803.11	1801.58
6.89274	-0.94431	1982.02	1985.69					6.89274	-0.9146	1929.69	1932.58					6.89274	-0.104312	1726.06	1725.97					6.89274	-0.743008	1769.7	1772.93					6.89274	0.218333	1802.93	1802.08
6.94401	-0.97389	1981.6	1985.83					6.94401	-0.8542	1929.89	1932.59					6.94401	-0.062952	1725.74	1726.41					6.94401	-0.495733	1769.47	1771.63					6.94401	0.100656	1802.53	1802.14
6.99527	-1.2362	1980.59	1985.52					6.99527	-0.61919	1930.13	1932.09					6.99527	-0.153694	1725.1	1725.95					6.99527	-0.371313	1768.79	1770.41					6.99527	0.394638	1802.64	1801.11
7.04653	-1.45304	1980.38	1985.57					7.04653	-0.74839	1929.9	1932.26					7.04653	-0.0489157	1725.54	1725.61					7.04653	-0.674772	1768.39	1771.33					7.04653	0.693132	1803.08	1800.39
7.09779	-1.36951	1980.63	1986.24					7.09779	-0.85313	1929.51	1932.2					7.09779	0.214394	1726.44	1725.7					7.09779	-0.941381	1768.48	1772.58					7.09779	0.728751	1802.84	1800.01
7.14905	-1.30956	1980.3	1986.15					7.14905	-0.57954	1929.37	1931.2					7.14905	0.383284	1726.94	1725.73					7.14905	-0.955343	1768.94	1773.1					7.14905	0.430703	1802.12	1800.45
7.20032	-1.3752	1980.23	1985.58					7.20032	-0.433	1929.58	1930.95					7.20032	0.546863	1726.98	1725.67					7.20032	-0.880718	1769.5	1773.33					7.20032	0.218477	1803.35	1802.5
7.25158	-1.40243	1980.93	1985.77					7.25158	-0.78882	1929.35	1931.84					7.25158	0.462592	1726.2	1725.16					7.25158	-0.536297	1770.74	1773.07					7.25158	0.595029	1806.51	1804.19
7.30284	-1.34865	1981.6	1986.59					7.30284	-0.94058	1929.22	1932.19					7.30284	0.233457	1725.64	1724.66					7.30284	-0.196563	1771.67	1772.52					7.30284	1.12955	1807.95	1803.56
7.3541	-1.28346	1982.1	1987.04					7.3541	-0.73036	1929.1	1931.41					7.3541	0.172728	1725.62	1724.86					7.3541	-0.264071	1771.02	1772.17					7.3541	1.39029	1806.33	1800.94
7.40536	-1.36773	1982.56	1987.27					7.40536	-0.79317	1928.78	1931.28					7.40536	0.062711	1725.37	1725.05					7.40536	-0.381752	1770.43	1772.09					7.40536	1.10723	1802.66	1798.37
7.45662	-1.54126	1982.39	1988.08					7.45662	-0.83503	1929.12	1931.75					7.45662	-0.221988	1725.31	1725.16					7.45662	-0.281325	1771.03	1772.26					7.45662	0.591422	1799.04	1796.75
7.50789	-1.34841	1982.52	1988.61					7.50789	-0.75435	1929.38	1931.76					7.50789	-0.257738	1725.63	1726.04					7.50789	-0.310207	1771.42	1772.77					7.50789	0.541299	1798.14	1796.04
7.55915	-1.09606	1983.07	1987.96					7.55915	-0.85556	1929.4	1932.1					7.55915	-0.283446	1725.2	1726.48					7.55915	-0.503854	1771.07	1773.26					7.55915	1.01486	1799.86	1795.93
7.61041	-0.98274	1983.24	1987.49					7.61041	-0.84198	1929.57	1932.23					7.61041	-0.435677	1724.71	1726.15					7.61041	-0.512348	1771.02	1773.25					7.61041	1.3138	1801.37	1796.28
7.66167	-0.77742	1983.51	1987.21					7.66167	-0.79251	1929.32	1931.82					7.66167	-0.336274	1725.09	1726.16					7.66167	-0.417072	1771.06	1772.88					7.66167	1.01582	1800.92	1796.99
7.71293	-0.51426	1983.8	1986.64					7.71293	-0.97204	1929.05	1932.12					7.71293	-0.243294	1725.45	1726.21					7.71293	-0.464777	1770.54	1772.56					7.71293	0.705538	1799.79	1797.06
7.7642	-0.30118	1983.3	1985.87					7.7642	-1.07105	1929.04	1932.42					7.7642	-0.321109	1725.54	1726.26					7.7642	-0.59289	1770.06	1772.64					7.7642	0.607963	1798.95	1796.6
7.81546	-0.40111	1982.31	1984.51					7.81546	-0.84248	1928.95	1931.61					7.81546	-0.375985	1725.81	1726.6					7.81546	-0.758669	1769.66	1772.96					7.81546	0.542898	1798.25	1796.15
7.86672	-0.43789	1982.33	1983.92					7.86672	-0.64146	1928.91	1930.93					7.86672	-0.135461	1726.5	1727.06					7.86672	-0.905368	1769.49	1773.43					7.86672	0.503391	1797.14	1795.19
7.91798	-0.36231	1982.8	1984.09					7.91798	-0.64994	1928.91	1930.97					7.91798	0.239256	1726.88	1726.95					7.91798	-0.600928	1770.97	1773.59					7.91798	0.060254	1795.57	1795.34
7.96924	-0.36835	1982.68	1984.26					7.96924	-0.61587	1929.01	1930.96					7.96924	0.679238	1727	1726.09					7.96924	0.276423	1774.44	1773.24					7.96924	-0.60695	1795.74	1798.1
8.0205	-0.3944	1982.33	1984.17					8.0205	-0.61324	1929.03	1930.96					8.0205	1.1714	1726.49	1724.74					8.0205	0.988512	1777.14	1772.83					8.0205	-0.59329	1797.77	1800.07
8.07177	-0.44612	1982.32	1983.91					8.07177	-0.75837	1929.1	1931.49					8.07177	1.08387	1725.04	1722.61					8.07177	0.933683	1776.43	1772.37					8.07177	-0.336	1798.79	1800.1
8.12303	-0.3142	1982.4	1984.12					8.12303	-0.7743	1929.62	1932.07					8.12303	0.603281	1724.62	1721.45					8.12303	0.49112	1774.49	1772.35					8.12303	-0.39079	1798.62	1800.13
8.17429	-0.3539	1981.54	1983.66					8.17429	-0.57257	1930.05	1931.85					8.17429	0.371129	1724.96	1722.62					8.17429	0.258852	1773.76	1772.63					8.17429	-0.06994	1799.59	1799.86
8.22555	-0.6169	1980.58	1982.96					8.22555	-0.62201	1929.86	1931.82					8.22555	0.440786	1725.2	1723.73					8.22555	0.00022272	1772.66	1772.66					8.22555	0.495927	1801.55	1799.63
8.27681	-0.73018	1980.05	1983.07					8.27681	-0.60598	1930.41	1932.33					8.27681	0.681316	1726.29	1723.73					8.27681	-0.453968	1771.1	1773.07					8.27681	0.643982	1802.57	1800.07
8.32808	-0.68867	1979.9	1982.98					8.32808	-0.09638	1932.01	1932.32					8.32808	0.782974	1727.44	1724.02					8.32808	-0.547914	1770.83	1773.22					8.32808	0.32072	1802.3	1801.06
8.37934	-0.5649	1980.23	1982.67					8.37934	0.116787	1932.54	1932.17					8.37934	0.818341	1727.21	1724.84					8.37934	-0.483891	1770.85	1772.96					8.37934	0.019296	1801.62	1801.54
8.4306	-0.51895	1980.74	1982.5					8.4306	-0.1227	1931.7	1932.09					8.4306	0.749201	1726.01	1724.49					8.4306	-0.565887	1770.68	1773.14					8.4306	0.197158	1801.75	1800.99
8.48186	-0.62657	1981.17	1982.83					8.48186	-0.22782	1930.72	1931.44					8.48186	0.411761	1725.02	1723.53					8.48186	-0.53448	1771.14	1773.47					8.48186	0.28533	1802.33	1801.22
8.53312	-0.78517	1981.73	1983.69					8.53312	-0.31237	1929.68	1930.67					8.53312	0.0955442	1724.44	1723.65					8.53312	-0.427708	1771.49	1773.35					8.53312	0.245901	1802.39	1801.43
8.58438	-0.81504	1982.71	1984.89					8.58438	-0.51459	1928.33	1929.96					8.58438	-0.0082022	1724.13	1724.12					8.58438	-0.369113	1771.12	1772.72					8.58438	0.406548	1802.1	1800.53
8.63565	-0.69253	1983.01	1985.99					8.63565	-0.53172	1927.53	1929.2					8.63565	0.119165	1724.22	1724.16					8.63565	-0.340564	1770.53	1772.02					8.63565	0.186711	1801.35	1800.62
8.68691	-0.4492	1983.15	1985.8					8.68691	-0.51287	1928.05	1929.66					8.68691	0.247071	1724.49	1723.82					8.68691	-0.235092	1770.19	1771.21					8.68691	-0.28094	1800.65	1801.74
8.73817	-0.30787	1983.7	1984.96					8.73817	-0.43368	1929.77	1931.13					8.73817	0.338132	1725.04	1723.67					8.73817	-0.284713	1769.55	1770.78					8.73817	-0.29033	1801.08	1802.2
8.78943	-0.33913	1983.85	1984.94					8.78943	-0.1148	1931.21	1931.58					8.78943	0.461908	1725.62	1723.91					8.78943	-0.482364	1769.16	1771.25					8.78943	-0.03797	1801.67	1801.81
8.84069	-0.27548	1983.86	1985.21					8.84069	-0.13538	1931.12	1931.55					8.84069	0.32178	1725.84	1724.08					8.84069	-0.567762	1769.51	1771.98					8.84069	-0.04196	1801.29	1801.45
8.89196	-0.41893	1983.54	1984.97					8.89196	-0.29681	1930.95	1931.89					8.89196	-0.11457	1726	1724.77					8.89196	-0.585464	1769.81	1772.36					8.89196	-0.21702	1800.9	1801.74
8.94322	-0.74221	1982.69	1985.23					8.94322	-0.21567	1931.19	1931.87					8.94322	-0.374586	1725.9	1726.38					8.94322	-0.430408	1770.04	1771.92					8.94322	-0.2014	1801.58	1802.36
8.99448	-0.90045	1981.73	1985.68					8.99448	-0.248	1930.94	1931.73					8.99448	-0.134907	1725.95	1727.15					8.99448	-0.189915	1770.21	1771.04					8.99448	-0.13384	1802.3	1802.82
9.04574	-1.00679	1981.44	1985.36					9.04574	-0.25623	1931.12	1931.92					9.04574	0.186111	1726.55	1726.4					9.04574	-0.135961	1770.47	1771.06					9.04574	-0.15675	1801.91	1802.52
9.097	-0.95026	1982.15	1985.49					9.097	-0.08317	1932.05	1932.31					9.097	0.00812216	1726.75	1725.94					9.097	-0.118171	1771.18	1771.69					9.097	-0.11312	1801.01	1801.45
9.14826	-0.77075	1982.61	1985.98					9.14826	0.09502	1932.84	1932.54					9.14826	-0.20314	1726.29	1726.73					9.14826	0.00887596	1772.08	1772.05					9.14826	-0.11822	1799.92	1800.38
9.19953	-0.70752	1982.41	1985.71					9.19953	0.130702	1932.71	1932.3					9.19953	0.28595	1726.78	1726.97					9.19953	-0.0408809	1772.21	1772.39					9.19953	-0.27904	1798.81	1799.89
9.25079	-0.83783	1981.82	1985.27					9.25079	0.112871	1931.95	1931.59					9.25079	1.46298	1730.19	1725.83					9.25079	-0.276553	1771.35	1772.55					9.25079	-0.27195	1798.17	1799.22
9.30205	-0.95942	1981.3	1985.2					9.30205	0.189603	1931.64	1931.05					9.30205	2.74686	1734.92	1725.33					9.30205	-0.513055	1770.15	1772.38					9.30205	0.013493	1798.02	1797.97
9.35331	-0.88818	1981.5	1985.17					9.35331	0.095327	1931.53	1931.23					9.35331	3.30621	1736.8	1725.79					9.35331	-0.587066	1769.66	1772.21					9.35331	0.015877	1797.87	1797.81
9.40457	-0.60836	1982.42	1985.08					9.40457	-0.10396	1931.29	1931.62					9.40457	3.08958	1735.49	1725.81					9.40457	-0.523003	1769.9	1772.17					9.40457	-0.25393	1797.51	1798.5
9.45584	-0.3545	1983.23	1984.87					9.45584	-0.05546	1931.64	1931.82					9.45584	2.63367	1733.93	1725.23					9.45584	-0.705896	1769.33	1772.4					9.45584	-0.2677	1797.68	1798.72
9.5071	-0.47504	1982.73	1984.66					9.5071	-0.02799	1931.81	1931.9					9.5071	1.98097	1732.52	1725.18					9.5071	-0.960191	1768.63	1772.81					9.5071	-0.10925	1798.49	1798.92
9.55836	-0.75547	1981.67	1984.64					9.55836	-0.27337	1930.75	1931.61					9.55836	1.49072	1730.93	1725.94					9.55836	-0.936407	1768.95	1773.02					9.55836	-0.0525	1798.88	1799.08
9.60962	-0.9954	1980.85	1984.71					9.60962	-0.50488	1929.51	1931.11					9.60962	1.28109	1730.03	1725.97					9.60962	-0.736903	1769.91	1773.12					9.60962	0.24392	1799.59	1798.64
9.66088	-1.14384	1980.58	1984.86					9.66088	-0.44452	1929.18	1930.58					9.66088	0.871454	1729.23	1725.77					9.66088	-0.458436	1771.57	1773.56					9.66088	1.0014	1802.11	1798.23
9.71215	-0.96664	1981.62	1985.19					9.71215	-0.27556	1929.43	1930.3					9.71215	0.600685	1728.21	1726.34					9.71215	-0.154145	1773.34	1774.02					9.71215	1.59397	1804.54	1798.36
9.76341	-0.59992	1982.71	1985.52					9.76341	-0.31709	1929.49	1930.49					9.76341	0.298743	1726.86	1726.21					9.76341	-0.0186577	1773.79	1773.87					9.76341	1.39353	1803.57	1798.17
9.81467	-0.64868	1982.3	1985.13					9.81467	-0.50346	1929.05	1930.64					9.81467	0.191825	1725.81	1725.86					9.81467	-0.199477	1772.63	1773.5					9.81467	0.802793	1800.81	1797.7
9.86593	-0.96973	1981.5	1984.91					9.86593	-0.56089	1928.77	1930.54					9.86593	0.4701	1725.44	1725.18					9.86593	-0.511949	1771.22	1773.45					9.86593	0.446677	1799.49	1797.76
9.91719	-1.05449	1981.21	1985.41					9.91719	-0.39336	1929.15	1930.39					9.91719	0.455692	1724.82	1723.88					9.91719	-0.460347	1771.21	1773.22					9.91719	0.119228	1798.49	1798.03
9.96845	-0.94949	1981.66	1985.46					9.96845	-0.09092	1929.87	1930.16					9.96845	0.545106	1724.82	1723.31					9.96845	-0.122886	1772.03	1772.56					9.96845	-0.25942	1797.07	1798.07
10.0197	-0.74418	1982.7	1985.49					10.0197	0.092274	1930.35	1930.06					10.0197	0.521676	1725.61	1723.01					10.0197	0.10496	1772.51	1772.05					10.0197	-0.52761	1795.99	1798.04
10.071	-0.42506	1983.56	1985.7					10.071	-0.11686	1930.09	1930.46					10.071	0.12314	1725.56	1723.88					10.071	0.227741	1772.95	1771.96					10.071	-0.60531	1795.65	1797.99
10.1222	-0.00078	1984.84	1985.27					10.1222	-0.61767	1929.32	1931.27					10.1222	-0.104964	1725.09	1725.15					10.1222	0.146321	1772.79	1772.16					10.1222	-0.50397	1796.22	1798.18
10.1735	0.164279	1985.72	1984.85					10.1735	-0.83561	1929.3	1931.94					10.1735	-0.0170614	1725.61	1725.44					10.1735	-0.0445633	1771.91	1772.1					10.1735	-0.45074	1796.74	1798.49
10.2248	0.015702	1985.05	1985.06					10.2248	-0.69648	1930.04	1932.24					10.2248	0.341729	1726.53	1725.66					10.2248	-0.135229	1771.52	1772.11					10.2248	-0.38519	1796.76	1798.26
10.276	-0.09355	1984.06	1984.98					10.276	-0.6398	1929.94	1931.96					10.276	0.467162	1726.61	1725.4					10.276	-0.144651	1771.92	1772.55					10.276	-0.31564	1796.78	1798
10.3273	-0.03726	1983.72	1984.43					10.3273	-0.71128	1928.73	1930.97					10.3273	0.105437	1725.58	1725.06					10.3273	-0.101414	1772.11	1772.55					10.3273	-0.37518	1797.17	1798.63
10.3785	-0.05773	1983.48	1983.87					10.3785	-0.84195	1927.67	1930.32					10.3785	-0.081984	1725.13	1725.23					10.3785	-0.140255	1771.68	1772.29					10.3785	-0.28911	1797.98	1799.1
10.4298	-0.34312	1982.83	1983.71					10.4298	-0.75197	1927.92	1930.29					10.4298	0.059486	1725.83	1725.41					10.4298	-0.321269	1771.23	1772.63					10.4298	-0.17027	1798.48	1799.14
10.4811	-0.63743	1982.48	1984.22					10.4811	-0.61004	1928.18	1930.11					10.4811	0.123495	1726.41	1725.63					10.4811	-0.447895	1771.03	1772.98					10.4811	-0.26595	1798.31	1799.34
10.5323	-0.80986	1982.21	1985.05					10.5323	-0.79945	1927.65	1930.17					10.5323	0.033215	1726.12	1726					10.5323	-0.389331	1770.86	1772.56					10.5323	-0.33965	1797.94	1799.26
10.5836	-0.89223	1981.48	1985.47					10.5836	-0.96591	1927.44	1930.49					10.5836	-0.040772	1725.41	1726.01					10.5836	-0.348635	1770.63	1772.14					10.5836	-0.48369	1796.97	1798.84
10.6349	-0.99398	1980.94	1985.07					10.6349	-1.0098	1927.67	1930.85					10.6349	-0.0902016	1725.09	1725.55					10.6349	-0.460558	1770.27	1772.27					10.6349	-0.701	1795.92	1798.64
10.6861	-0.87639	1980.74	1984.94					10.6861	-0.95469	1928.41	1931.43					10.6861	-0.252507	1724.51	1725.39					10.6861	-0.678241	1769.62	1772.57					10.6861	-0.66996	1796.23	1798.83
10.7374	-0.60189	1980.21	1984.27					10.7374	-0.79709	1929.17	1931.68					10.7374	-0.205241	1724.39	1725.35					10.7374	-0.757939	1769.19	1772.48					10.7374	-0.75399	1796.34	1799.26
10.7886	-0.74815	1979.63	1982.63					10.7886	-0.85278	1929.13	1931.82					10.7886	-0.0005771	1725.13	1725.07					10.7886	-0.755821	1769.04	1772.33					10.7886	-0.92006	1795.73	1799.3
10.8399	-0.98175	1980.29	1982.65					10.8399	-0.96509	1928.89	1931.94					10.8399	0.120751	1725.37	1725.13					10.8399	-0.853128	1769	1772.72					10.8399	-0.76885	1796.06	1799.05
10.8912	-0.88382	1981.75	1984.24					10.8912	-0.82165	1928.96	1931.56					10.8912	0.2863	1725.14	1724.97					10.8912	-0.626791	1769.65	1772.38					10.8912	-0.66269	1796.54	1799.11
10.9424	-0.87149	1982.6	1985.31					10.9424	-0.58388	1928.48	1930.32					10.9424	0.338332	1724.86	1724.19					10.9424	-0.402429	1769.96	1771.71					10.9424	-0.87931	1796.67	1800.08
10.9937	-0.98082	1983.37	1986.11					10.9937	-0.60126	1926.92	1928.82					10.9937	0.193303	1724.88	1723.74					10.9937	-0.525242	1769.52	1771.8					10.9937	-1.12477	1797.19	1801.55
11.045	-0.78317	1984.33	1987.32					11.045	-0.83611	1925.68	1928.32					11.045	-0.150277	1724.82	1724.24					11.045	-0.630486	1769.24	1771.98					11.045	-1.05797	1798.32	1802.43
11.0962	-0.44081	1984.44	1987.49					11.0962	-0.87784	1925.69	1928.46					11.0962	-0.533424	1724.37	1725.32					11.0962	-0.638917	1769.35	1772.13					11.0962	-0.95126	1799.53	1803.23
11.1475	-0.4182	1983.49	1986.21					11.1475	-0.84827	1926.33	1929					11.1475	-0.510145	1724.39	1726.15					11.1475	-0.580145	1769.98	1772.51					11.1475	-0.93036	1799.8	1803.41
11.1987	-0.61233	1981.93	1985.17					11.1987	-0.6483	1927.66	1929.71					11.1987	-0.11066	1724.37	1726.09					11.1987	-0.516787	1770.33	1772.58					11.1987	-0.76831	1800.11	1803.1
11.25	-0.66669	1981.14	1984.39					11.25	-0.30468	1928.86	1929.82					11.25	-0.0524222	1723.5	1724.74					11.25	-0.552756	1770.08	1772.49					11.25	-0.64284	1800.84	1803.34
11.3013	-0.58588	1981.79	1983.82					11.3013	-0.4877	1928.51	1930.05					11.3013	-0.361875	1722.95	1723.67					11.3013	-0.60739	1770.22	1772.87					11.3013	-0.68926	1800.72	1803.4
11.3525	-0.61017	1981.99	1984.15					11.3525	-0.94437	1927.72	1930.7					11.3525	-0.329587	1723.61	1724.15					11.3525	-0.557499	1770.42	1772.85					11.3525	-0.61763	1800.42	1802.82
11.4038	-0.76379	1981.5	1984.45					11.4038	-1.03753	1927.86	1931.14					11.4038	-0.1586	1724.14	1724.71					11.4038	-0.544146	1769.8	1772.17					11.4038	-0.21762	1800.28	1801.13
11.455	-0.79651	1981.71	1984.58					11.455	-0.87921	1928.68	1931.45					11.455	-0.233457	1723.79	1724.67					11.455	-0.591914	1769.06	1771.64					11.455	0.149079	1799.95	1799.38
11.5063	-0.86156	1982.06	1984.91					11.5063	-0.75518	1929.27	1931.65					11.5063	-0.385604	1723.71	1724.57					11.5063	-0.715278	1768.95	1772.07					11.5063	0.092929	1799.86	1799.5
11.5576	-0.95022	1982.6	1985.53					11.5576	-0.60519	1929.55	1931.46					11.5576	-0.399483	1724.36	1724.99					11.5576	-0.783635	1769.45	1772.87					11.5576	-0.13213	1800.02	1800.53
11.6088	-0.90692	1983.31	1986.43					11.6088	-0.37969	1929.92	1931.12					11.6088	-0.192433	1725.08	1725.68					11.6088	-0.728452	1769.81	1772.98					11.6088	-0.18983	1799.73	1800.46
11.6601	-0.82433	1983.38	1986.97					11.6601	-0.11016	1930.53	1930.88					11.6601	-0.0315504	1725.44	1725.72					11.6601	-0.612176	1770.29	1772.95					11.6601	-0.17486	1798.74	1799.41
11.7114	-0.81135	1983.32	1986.7					11.7114	-0.03063	1930.92	1931.02					11.7114	0.034706	1725.9	1725.54					11.7114	-0.481544	1770.98	1773.07					11.7114	-0.1243	1798.53	1799.01
11.7626	-0.98055	1983.61	1986.59					11.7626	-0.18184	1930.62	1931.2					11.7626	0.0544958	1726.11	1725.78					11.7626	-0.442845	1770.73	1772.66					11.7626	0.223249	1799.38	1798.51
11.8139	-0.90885	1983.7	1987.57					11.8139	-0.26673	1930.64	1931.48					11.8139	0.0286196	1725.53	1725.93					11.8139	-0.424937	1770.23	1772.08					11.8139	0.616658	1799.45	1797.06
11.8651	-0.56917	1983.42	1987.37					11.8651	-0.26708	1931.03	1931.87					11.8651	-0.0365261	1724.96	1725.44					11.8651	-0.646477	1769.9	1772.71					11.8651	0.36497	1798.91	1797.5
11.9164	-0.58719	1983.11	1985.72					11.9164	-0.31798	1930.64	1931.64					11.9164	-0.145391	1724.95	1725.08					11.9164	-0.84203	1769.69	1773.36					11.9164	-0.08784	1798.83	1799.17
11.9677	-0.77973	1982.75	1985.47					11.9677	-0.4147	1930	1931.31					11.9677	0.033752	1725.61	1725.44					11.9677	-0.738069	1769.6	1772.82					11.9677	-0.12186	1798.66	1799.13
12.0189	-0.72662	1982.83	1985.89					12.0189	-0.48353	1929.68	1931.21					12.0189	0.365326	1726.11	1725.5					12.0189	-0.725167	1769.56	1772.72					12.0189	-0.006	1799.01	1799.03
12.0702	-0.73627	1982.83	1985.76					12.0702	-0.40313	1930.25	1931.52					12.0702	0.333748	1725.83	1724.9					12.0702	-0.689497	1770.04	1773.04					12.0702	0.413144	1799.89	1798.29
12.1215	-0.89083	1982.61	1985.8					12.1215	-0.09377	1931.8	1932.09					12.1215	0.164056	1725.6	1724.72					12.1215	-0.652539	1769.93	1772.77					12.1215	0.89735	1798.46	1794.99
12.1727	-0.87315	1982.99	1986.19					12.1727	0.152179	1932.72	1932.24					12.1727	0.180767	1725.45	1725.06					12.1727	-0.778714	1769.15	1772.54					12.1727	0.780097	1795.28	1792.27
12.224	-0.7158	1983.55	1986.51					12.224	0.077677	1932.43	1932.18					12.224	0.0773365	1724.9	1724.85					12.224	-0.827546	1769.18	1772.78					12.224	0.500175	1793.81	1791.88
12.2752	-0.64881	1983.46	1986.43					12.2752	-0.09166	1932.16	1932.45					12.2752	-0.0264069	1724.52	1724.64					12.2752	-0.812892	1769.29	1772.83					12.2752	0.206143	1792.81	1792.01
12.3265	-0.7744	1982.77	1986.07					12.3265	0.043713	1932.7	1932.56					12.3265	0.254488	1724.52	1724.61					12.3265	-0.798632	1769.29	1772.76					12.3265	-0.03447	1791.09	1791.22
12.3778	-0.92192	1982.74	1985.89					12.3778	0.338719	1932.92	1931.86					12.3778	0.419506	1724.44	1723.68					12.3778	-0.758424	1769.62	1772.92					12.3778	-0.30872	1790.66	1791.86
12.429	-0.87096	1983.33	1986.45					12.429	0.383139	1932.77	1931.56					12.429	0.243795	1724.13	1723.05					12.429	-0.432532	1770.83	1772.71					12.429	-0.843	1793.56	1796.83
12.4803	-0.64714	1983.79	1986.84					12.4803	0.279694	1932.96	1932.08					12.4803	0.263626	1723.37	1723.32					12.4803	0.132456	1773.48	1772.9					12.4803	-0.80663	1798.89	1802.02
12.5315	-0.49201	1984.04	1986.4					12.5315	0.283409	1932.87	1931.97					12.5315	0.263526	1722.65	1722.49					12.5315	0.27704	1774.63	1773.43					12.5315	-0.40576	1802.47	1804.05
12.5828	-0.53545	1983.65	1986.02					12.5828	0.365302	1932.66	1931.5					12.5828	-0.0721418	1722.47	1721.78					12.5828	0.0340479	1773.36	1773.21					12.5828	-0.00231	1803.62	1803.63
12.6341	-0.60029	1983.22	1985.81					12.6341	0.411485	1932.62	1931.32					12.6341	-0.239316	1722.57	1722.71					12.6341	-0.201841	1772.22	1773.1					12.6341	0.294781	1803.79	1802.65
12.6853	-0.6544	1983.08	1985.64					12.6853	0.196986	1932.02	1931.4					12.6853	-0.0963502	1723	1723.37					12.6853	-0.148951	1772.31	1772.96					12.6853	0.108052	1803.87	1803.45
12.7366	-0.89133	1982.63	1985.72					12.7366	-0.26854	1930.92	1931.77					12.7366	0.0284223	1723.48	1723.32					12.7366	0.0380467	1772.57	1772.41					12.7366	0.033611	1804.17	1804.04
12.7879	-1.15723	1982.36	1986.22					12.7879	-0.57118	1930.19	1932					12.7879	0.223262	1724.09	1723.38					12.7879	-0.0916632	1771.45	1771.85					12.7879	0.246508	1804.33	1803.37
12.8391	-1.01113	1983	1987.03					12.8391	-0.56761	1930.18	1931.97					12.8391	0.412889	1724.65	1723.35					12.8391	-0.234494	1770.42	1771.44					12.8391	0.010729	1804.15	1804.11
12.8904	-0.71886	1983.7	1987.08					12.8904	-0.5528	1930.36	1932.1					12.8904	0.380302	1724.56	1723.28					12.8904	-0.22885	1770.86	1771.85					12.8904	-0.60483	1803.85	1806.2
12.9416	-0.38441	1984.6	1986.6					12.9416	-0.71254	1930.13	1932.38					12.9416	0.0982735	1723.96	1723.3					12.9416	-0.170304	1771.77	1772.51					12.9416	-0.68984	1804.31	1807
12.9929	0.023271	1986.07	1986.15					12.9929	-0.51518	1930.68	1932.31					12.9929	-0.113291	1723.94	1723.63					12.9929	-0.0069262	1772.53	1772.56					12.9929	-0.1457	1804.98	1805.55
13.0442	-0.06072	1986.29	1985.97					13.0442	-0.1229	1931.76	1932.14					13.0442	-0.0084427	1724.31	1724.32					13.0442	0.0638499	1772.49	1772.21					13.0442	0.366148	1804.55	1803.13
13.0954	-0.43328	1985.18	1986.53					13.0954	0.06623	1932.61	1932.4					13.0954	-0.187298	1723.88	1724.34					13.0954	-0.119137	1771.55	1772.07					13.0954	0.505208	1802.76	1800.8
13.1467	-0.66007	1984.44	1986.92					13.1467	0.530939	1934.07	1932.39					13.1467	-0.398307	1723.65	1724.51					13.1467	-0.329029	1770.94	1772.37					13.1467	0.457789	1801.37	1799.59
13.1979	-0.67222	1984.47	1987.1					13.1979	1.1002	1935.34	1931.86					13.1979	-0.183971	1724.08	1724.98					13.1979	-0.339593	1770.82	1772.3					13.1979	0.456449	1801.95	1800.17
13.2492	-0.60801	1984.62	1987.18					13.2492	1.3642	1935.78	1931.47					13.2492	0.0776305	1724.65	1724.7					13.2492	-0.224881	1770.92	1771.89					13.2492	0.582149	1803.44	1801.18
13.3005	-0.56103	1984.46	1987.08					13.3005	1.36189	1935.47	1931.17					13.3005	0.412663	1724.8	1724.39					13.3005	-0.190792	1771.18	1772.01					13.3005	0.734474	1804.27	1801.42
13.3517	-0.31459	1984.98	1986.72					13.3517	1.27046	1934.68	1930.67					13.3517	0.620659	1724	1723.43					13.3517	-0.228981	1771.05	1772.05					13.3517	0.636909	1803.43	1800.96
13.403	0.041385	1986.04	1986.25					13.403	1.07307	1933.77	1930.39					13.403	0.27444	1723.09	1721.95					13.403	-0.100213	1770.81	1771.25					13.403	0.208451	1802.18	1801.37
13.4543	0.116996	1985.96	1985.87					13.4543	0.611056	1932.63	1930.7					13.4543	-0.471985	1723.22	1722.18					13.4543	-0.0212228	1771.05	1771.15					13.4543	-0.23552	1801.77	1802.68
13.5055	-0.25178	1984.64	1985.49					13.5055	0.308329	1931.89	1930.92					13.5055	-1.10624	1724.66	1724.79					13.5055	-0.272596	1771.09	1772.28					13.5055	-0.23144	1801.42	1802.33
13.5568	-0.66106	1983.67	1985.65					13.5568	0.555083	1932.45	1930.7					13.5568	-1.56803	1726.69	1728.34					13.5568	-0.414899	1770.64	1772.44					13.5568	-0.09854	1800.63	1801.01
13.608	-0.84589	1983.52	1986.34					13.608	0.742482	1933.17	1930.83					13.608	-1.84046	1728.96	1731.93					13.608	-0.214136	1770.61	1771.54					13.608	-0.27488	1800.05	1801.12
13.6593	-1.01989	1982.92	1986.92					13.6593	0.532151	1932.8	1931.12					13.6593	-1.64955	1731.29	1735.12					13.6593	-0.154638	1770.51	1771.18					13.6593	-0.50345	1800.04	1802
13.7106	-1.2354	1981.91	1987.03					13.7106	0.353763	1931.99	1930.87					13.7106	-1.34249	1732.47	1736.81					13.7106	-0.293548	1769.89	1771.17					13.7106	-0.57327	1799.59	1801.82
13.7618	-1.26667	1981.93	1986.89					13.7618	0.280919	1931.53	1930.64					13.7618	-0.867717	1730.99	1736.96					13.7618	-0.435827	1769.58	1771.48					13.7618	-0.50907	1799.15	1801.13
13.8131	-1.03148	1982.69	1987.03					13.8131	0.23797	1931.02	1930.27					13.8131	-0.0938121	1727.59	1733.89					13.8131	-0.640765	1769.51	1772.29					13.8131	-0.51787	1799.22	1801.23
13.8644	-0.84398	1982.62	1986.85					13.8644	0.10514	1929.77	1929.43					13.8644	0.306784	1725.35	1727.9					13.8644	-0.763973	1769.49	1772.82					13.8644	-0.76565	1798.49	1801.47
13.9156	-0.94358	1981.69	1986.02					13.9156	-0.26288	1928.35	1929.18					13.9156	0.283073	1725.11	1724.34					13.9156	-0.682014	1769.38	1772.35					13.9156	-1.0861	1797.35	1801.57
13.9669	-1.09328	1981.3	1985.49					13.9669	-0.49878	1927.99	1929.57					13.9669	0.286085	1725.26	1724.17					13.9669	-0.675539	1768.73	1771.67					13.9669	-0.91897	1798.08	1801.65
14.0181	-0.97114	1982.14	1985.71					14.0181	-0.56031	1928.08	1929.85					14.0181	0.170404	1725.04	1724.31					14.0181	-0.819766	1768.29	1771.85					14.0181	-0.54032	1799.89	1801.99
14.0694	-0.57099	1983.41	1986.06					14.0694	-0.82717	1927.17	1929.78					14.0694	-0.0953331	1725.1	1724.47					14.0694	-0.673209	1768.47	1771.4					14.0694	-0.64354	1800.21	1802.71
14.1207	-0.45824	1983.73	1985.71					14.1207	-0.88395	1926.67	1929.46					14.1207	-0.283306	1724.99	1725.41					14.1207	-0.348651	1767.88	1769.39					14.1207	-0.72614	1800.08	1802.9
14.1719	-0.89973	1982.61	1985.58					14.1719	-0.67193	1927.16	1929.28					14.1719	-0.242553	1724.23	1725.93					14.1719	-0.308891	1766.3	1767.64					14.1719	-0.55428	1800.82	1802.97
14.2232	-1.00408	1982.01	1986.24					14.2232	-0.67306	1927.33	1929.45					14.2232	-0.037021	1724.2	1725.04					14.2232	-0.364342	1765.79	1767.37					14.2232	-0.38875	1801.3	1802.81
14.2744	-0.73741	1982.29	1986.06					14.2744	-0.76739	1927.33	1929.75					14.2744	0.235864	1724.94	1724.32					14.2744	-0.406255	1766.64	1768.41					14.2744	-0.17042	1801.19	1801.85
14.3257	-0.82852	1981.62	1985.26					14.3257	-0.82456	1927.22	1929.82					14.3257	0.368746	1725.45	1724.16					14.3257	-0.573847	1767.6	1770.09					14.3257	0.01193	1800.69	1800.65
14.377	-1.09565	1980.72	1984.96					14.377	-0.72729	1927.38	1929.68					14.377	0.0697455	1725.12	1724.22					14.377	-0.70836	1768.31	1771.39					14.377	-0.01991	1799.97	1800.05
14.4282	-1.23154	1980.78	1985.13					14.4282	-0.5952	1928.14	1930.02					14.4282	0.0649844	1724.57	1724.89					14.4282	-0.471208	1769.71	1771.76					14.4282	0.115654	1800.19	1799.74
14.4795	-1.24699	1981.19	1985.74					14.4795	-0.58761	1929.05	1930.9					14.4795	0.354677	1725.05	1724.35					14.4795	0.0841266	1772.16	1771.8					14.4795	0.691009	1801.2	1798.52
14.5308	-1.23373	1981.03	1986.21					14.5308	-0.45792	1929.95	1931.39					14.5308	0.43678	1726.53	1723.87					14.5308	0.306251	1773.28	1771.94					14.5308	0.745099	1800.98	1798.09
14.582	-1.15694	1981.03	1986					14.582	-0.31389	1930.61	1931.6					14.582	0.699165	1728.25	1725.08					14.582	0.153947	1772.71	1772.04					14.582	0.209923	1800	1799.19
14.6333	-1.23552	1981.18	1985.69					14.6333	-0.28011	1930.66	1931.55					14.6333	1.12754	1729.62	1725.93					14.6333	0.123466	1772.45	1771.91					14.6333	0.132457	1799.78	1799.27
14.6845	-1.35029	1981.23	1986.16					14.6845	-0.29777	1930.42	1931.36					14.6845	1.23896	1729.95	1725.87					14.6845	0.195928	1772.49	1771.64					14.6845	0.337037	1799.85	1798.54
14.7358	-1.20327	1981.52	1986.67					14.7358	-0.46838	1930.14	1931.62					14.7358	0.753707	1728.75	1725.84					14.7358	0.128072	1772.59	1772.03					14.7358	0.291689	1799.39	1798.26
14.7871	-1.04884	1981.3	1986.37					14.7871	-0.66791	1929.7	1931.81					14.7871	0.130136	1726.93	1726.24					14.7871	-0.062738	1772.81	1773.08					14.7871	0.043262	1798.54	1798.37
14.8383	-1.05242	1980.85	1985.53					14.8383	-0.76221	1929.18	1931.59					14.8383	-0.0180872	1725.6	1726.5					14.8383	-0.0438739	1773.32	1773.51					14.8383	-0.06696	1798.66	1798.92
14.8896	-1.24361	1980.8	1985.09					14.8896	-0.81014	1928.79	1931.35					14.8896	0.0812942	1724.95	1725.66					14.8896	0.217942	1774.44	1773.49					14.8896	0.057823	1799.05	1798.83
14.9409	-1.43719	1980.75	1985.81					14.9409	-0.81931	1928.76	1931.35					14.9409	0.016446	1725.03	1724.69					14.9409	0.204599	1774.65	1773.76					14.9409	0.006454	1798.56	1798.53
14.9921	-1.41496	1980.58	1986.54					14.9921	-0.8004	1929.07	1931.6					14.9921	0.054262	1725.46	1724.97					14.9921	-0.0006815	1773.58	1773.58					14.9921	-0.07419	1798.62	1798.91
15.0434	-1.23499	1980.72	1986.28					15.0434	-0.92993	1929.03	1931.96					15.0434	-0.151241	1725.21	1725.28					15.0434	-0.0063285	1773.13	1773.16					15.0434	0.131711	1799.45	1798.94
15.0946	-1.11895	1980.96	1985.7					15.0946	-0.83159	1929.19	1931.82					15.0946	-0.705169	1724.67	1725.71					15.0946	-0.0201963	1773.13	1773.21					15.0946	-0.07015	1799.64	1799.91
15.1459	-1.10702	1981.13	1985.47					15.1459	-0.37132	1930.1	1931.28					15.1459	-0.72577	1724.89	1727.02					15.1459	-0.111755	1772.32	1772.81					15.1459	-0.61524	1799.28	1801.67
15.1972	-1.25568	1980.96	1985.6					15.1972	-0.11463	1930.66	1931.03					15.1972	-0.607701	1724.47	1727.31					15.1972	-0.233685	1771.12	1772.14					15.1972	-0.56824	1799.41	1801.62
15.2484	-1.61724	1980.03	1986.02					15.2484	-0.04933	1930.5	1930.65					15.2484	-0.572941	1724.02	1726.49					15.2484	-0.258041	1771.01	1772.13					15.2484	-0.32057	1799.71	1800.95
15.2997	-1.66587	1979.73	1986.54					15.2997	-0.20071	1929.88	1930.51					15.2997	0.00967928	1725.46	1725.93					15.2997	-0.0744153	1772.03	1772.35					15.2997	-0.21861	1800.09	1800.94
15.3509	-1.38576	1980.64	1986.44					15.3509	-0.41302	1929.21	1930.52					15.3509	0.567142	1726.97	1725.43					15.3509	0.040467	1772.29	1772.11					15.3509	-0.14102	1800.36	1800.9
15.4022	-1.27873	1981.18	1986.23					15.4022	-0.50818	1928.97	1930.57					15.4022	0.709667	1726.98	1725.08					15.4022	-0.0484312	1771.71	1771.92					15.4022	0.040346	1801	1800.84
15.4535	-1.04636	1981.75	1986.34					15.4535	-0.60372	1929.32	1931.23					15.4535	0.714294	1726.15	1724.62					15.4535	-0.0875303	1771.9	1772.28					15.4535	0.541086	1802.43	1800.33
15.5047	-0.78899	1982.52	1985.96					15.5047	-0.72357	1929.26	1931.55					15.5047	0.539439	1726.01	1723.77					15.5047	0.0125236	1772.1	1772.04					15.5047	0.558236	1802.64	1800.47
15.556	-0.95492	1982.29	1985.69					15.556	-0.78289	1928.65	1931.12					15.556	0.475297	1727.07	1724.22					15.556	-0.0902703	1771.08	1771.47					15.556	0.100953	1801.83	1801.44
15.6073	-1.14935	1981.98	1986.13					15.6073	-0.68569	1928.65	1930.81					15.6073	0.644374	1727.74	1725.49					15.6073	-0.288951	1770.53	1771.79					15.6073	0.038538	1801.28	1801.13
15.6585	-0.96034	1982.46	1986.62					15.6585	-0.88403	1928.47	1931.26					15.6585	0.796449	1727.61	1725.6					15.6585	-0.313355	1770.99	1772.35					15.6585	0.069594	1800.62	1800.35
15.7098	-0.71505	1982.82	1986.33					15.7098	-1.16908	1928.25	1931.94					15.7098	0.704601	1726.76	1724.96					15.7098	-0.266449	1770.82	1771.98					15.7098	-0.11629	1799.97	1800.42
15.761	-0.80858	1982.77	1985.7					15.761	-1.04151	1929	1932.29					15.761	0.258272	1725.45	1724.42					15.761	-0.219523	1769.65	1770.6					15.761	-0.3141	1799.41	1800.63
15.8123	-0.84145	1983.01	1986.02					15.8123	-0.79985	1929.65	1932.18					15.8123	-0.0513032	1725.04	1724.59					15.8123	-0.167108	1768.88	1769.61					15.8123	-0.16208	1798.86	1799.48
15.8636	-0.73701	1983.32	1986.4					15.8636	-0.67559	1929.62	1931.75					15.8636	0.23057	1725.62	1725.21					15.8636	-0.184711	1768.85	1769.66					15.8636	0.242952	1798.01	1797.07
15.9148	-0.74639	1983.4	1986.29					15.9148	-0.60633	1929.43	1931.34					15.9148	0.457215	1726.04	1724.85					15.9148	-0.389228	1768.8	1770.49					15.9148	0.320907	1797.15	1795.91
15.9661	-0.90653	1983.27	1986.41					15.9661	-0.33407	1929.68	1930.73					15.9661	0.160792	1725.82	1724.53					15.9661	-0.366596	1770.42	1772.01					15.9661	0.406256	1798.31	1796.74
16.0174	-1.1833	1982.9	1986.92					16.0174	-0.14617	1930.06	1930.52					16.0174	0.113509	1725.92	1725.28					16.0174	0.0887808	1773.29	1772.9					16.0174	0.811698	1800.19	1797.05
16.0686	-0.96837	1983.31	1987.67					16.0686	-0.49514	1929.42	1930.98					16.0686	0.467323	1726.85	1725.54					16.0686	0.245183	1774.29	1773.22					16.0686	0.661934	1799.43	1796.87
16.1199	-0.52254	1984.04	1987.21					16.1199	-0.74931	1928.49	1930.86					16.1199	0.777358	1727.86	1725.3					16.1199	-0.059916	1773.72	1773.98					16.1199	-0.03565	1798.31	1798.45
16.1711	-0.4751	1984.01	1986.14					16.1711	-0.55801	1928.54	1930.31					16.1711	1.0509	1728.76	1725.28					16.1711	-0.114373	1773.54	1774.03					16.1711	-0.2558	1799.68	1800.67
16.2224	-0.31533	1984.58	1985.93					16.2224	-0.43662	1928.58	1929.96					16.2224	1.03479	1729.1	1725.26					16.2224	0.0866555	1773.78	1773.4					16.2224	-0.07992	1801.48	1801.8
16.2737	0.013134	1985.88	1985.85					16.2737	-0.5619	1927.36	1929.13					16.2737	0.831984	1728.42	1725.66					16.2737	-0.131097	1773.04	1773.61					16.2737	0.093614	1802.3	1801.94
16.3249	0.014991	1986.14	1985.83					16.3249	-0.71757	1926.19	1928.45					16.3249	0.952406	1727.78	1725.65					16.3249	-0.570469	1771.66	1774.14					16.3249	0.244556	1802.75	1801.8
16.3762	0.0449	1986.19	1986.08					16.3762	-0.50219	1927.27	1928.85					16.3762	1.09714	1727.83	1724.61					16.3762	-0.66915	1771.36	1774.27					16.3762	0.098221	1802.95	1802.57
16.4274	0.252541	1987.1	1986.01					16.4274	0.001883	1929.48	1929.47					16.4274	1.01949	1728.08	1724.18					16.4274	-0.530889	1771.55	1773.86					16.4274	-0.08798	1803.24	1803.59
16.4787	0.122147	1987.07	1986.09					16.4787	0.303001	1930.87	1929.92					16.4787	1.45584	1729.04	1724.7					16.4787	-0.355246	1771.47	1773.02					16.4787	0.201981	1803.96	1803.18
16.53	0.011133	1986.34	1986.58					16.53	0.342585	1931.15	1930.07					16.53	1.88574	1729.78	1724.21					16.53	-0.343434	1771.07	1772.56					16.53	0.445522	1804.43	1802.7
16.5812	0.00919	1985.83	1986.29					16.5812	0.212951	1930.82	1930.15					16.5812	1.53025	1728.86	1723.53					16.5812	-0.291973	1770.15	1771.43					16.5812	0.313814	1804.14	1802.92
16.6325	-0.20848	1984.89	1985.8					16.6325	-0.02419	1930.41	1930.49					16.6325	1.19935	1727.86	1723.78					16.6325	0.0439667	1769.88	1769.69					16.6325	0.139717	1803.47	1802.93
16.6838	-0.31444	1984.1	1985.73					16.6838	-0.24503	1929.87	1930.65					16.6838	1.05073	1727.91	1723.88					16.6838	0.327405	1770.5	1769.08					16.6838	-0.06842	1802.81	1803.08
16.735	-0.43649	1983.56	1985.36					16.735	-0.30458	1928.74	1929.7					16.735	0.862953	1727.94	1724.42					16.735	0.362604	1770.85	1769.27					16.735	-0.14941	1802.35	1802.93
16.7863	-0.70764	1983.04	1985.32					16.7863	-0.2816	1927.59	1928.47					16.7863	0.832859	1727.77	1725.08					16.7863	0.222706	1770.56	1769.59					16.7863	0.093436	1801.98	1801.62
16.8375	-0.82542	1982.76	1985.89					16.8375	-0.32605	1927.4	1928.42					16.8375	0.795249	1727.55	1725					16.8375	0.107975	1769.9	1769.43					16.8375	0.350908	1801.39	1800.03
16.8888	-0.87181	1982.65	1986.08					16.8888	-0.46851	1927.42	1928.89					16.8888	0.440898	1726.65	1724.91					16.8888	-0.0303775	1769.15	1769.28					16.8888	0.481403	1800.28	1798.41
16.9401	-0.86578	1982.23	1986.17					16.9401	-0.60527	1927.28	1929.18					16.9401	0.227931	1726.39	1725.18					16.9401	-0.266178	1769.26	1770.42					16.9401	0.487775	1798.75	1796.86
16.9913	-0.62063	1981.65	1985.72					16.9913	-0.57772	1927.7	1929.52					16.9913	0.573373	1727.92	1725.63					16.9913	-0.250474	1770.78	1771.87					16.9913	0.342071	1798.03	1796.71
17.0426	-0.25027	1981.68	1984.15					17.0426	-0.58048	1928.74	1930.58					17.0426	0.921532	1729.52	1726.02					17.0426	-0.131833	1771.93	1772.5					17.0426	0.277813	1798.51	1797.43
17.0938	-0.12886	1981.18	1982.69					17.0938	-0.58388	1929.61	1931.45					17.0938	0.909561	1729.43	1726.45					17.0938	-0.189331	1771.75	1772.57					17.0938	0.376591	1799.07	1797.61
17.1451	-0.23615	1979.7	1981.7					17.1451	-0.39315	1929.76	1931					17.1451	0.985289	1728.42	1726.41					17.1451	-0.310277	1770.92	1772.27					17.1451	0.36173	1799.31	1797.91
17.1964	-0.40758	1979.02	1980.65					17.1964	-0.2884	1929.72	1930.63					17.1964	0.832506	1726.84	1725.15					17.1964	-0.338014	1770.39	1771.86					17.1964	0.068301	1799.66	1799.4
17.2476	-0.55376	1979.56	1980.66					17.2476	-0.1838	1930.34	1930.92					17.2476	0.104079	1724.51	1724.08					17.2476	-0.258404	1770.72	1771.85					17.2476	-0.02351	1800.61	1800.7
17.2989	-0.50419	1980.61	1981.79					17.2989	-0.00477	1930.94	1930.95					17.2989	-0.195378	1723.32	1724.17					17.2989	-0.43801	1770.55	1772.46					17.2989	0.174833	1801.56	1800.88
17.3502	-0.51653	1981.78	1982.64					17.3502	-0.20605	1930.31	1930.96					17.3502	0.00040021	1723.57	1723.97					17.3502	-0.75912	1770.01	1773.31					17.3502	0.219112	1801.99	1801.14
17.4014	-0.66619	1982.32	1983.86					17.4014	-0.67864	1929.09	1931.23					17.4014	0.111735	1724.33	1723.57					17.4014	-0.680284	1770.37	1773.33					17.4014	0.327579	1802.92	1801.65
17.4527	-0.71461	1982.42	1985					17.4527	-0.84817	1928.64	1931.32					17.4527	0.360463	1725.14	1723.96					17.4527	-0.440275	1770.37	1772.28					17.4527	0.510709	1804.39	1802.4
17.5039	-0.57774	1983.29	1985.3					17.5039	-0.41538	1929.37	1930.68					17.5039	0.607885	1724.77	1723.94					17.5039	-0.503078	1769.41	1771.59					17.5039	0.721075	1805.24	1802.44
17.5552	-0.53929	1983.85	1985.62					17.5552	-0.03779	1929.5	1929.62					17.5552	0.595067	1723.67	1722.75					17.5552	-0.525837	1769.01	1771.3					17.5552	1.1081	1805.62	1801.32
17.6065	-0.46015	1983.34	1986.02					17.6065	-0.40349	1928.22	1929.49					17.6065	0.491271	1723.64	1721.7					17.6065	-0.437582	1769.06	1770.96					17.6065	1.14149	1805.99	1801.56
17.6577	-0.31661	1982.82	1985.2					17.6577	-0.92183	1927.11	1930.02					17.6577	0.211134	1723.84	1722.01					17.6577	-0.730676	1768.5	1771.68					17.6577	0.651682	1805.95	1803.42
17.709	-0.47401	1982.07	1984.1					17.709	-1.0482	1927.02	1930.33					17.709	-0.224369	1724.22	1723.14					17.709	-1.14043	1767.97	1772.94					17.709	0.419261	1805.22	1803.59
17.7603	-0.65613	1981.48	1983.98					17.7603	-0.94169	1927.64	1930.61					17.7603	-0.328026	1726.34	1724.97					17.7603	-1.1226	1767.92	1772.8					17.7603	0.697478	1804.11	1801.4
17.8115	-0.83657	1981.23	1984.12					17.8115	-0.88544	1927.77	1930.56					17.8115	0.186203	1728.14	1727.43					17.8115	-0.864101	1768.24	1772					17.8115	0.595357	1802.81	1800.5
17.8628	-0.94547	1981.12	1984.6					17.8628	-0.80677	1927.27	1929.82					17.8628	0.586097	1727.03	1727.52					17.8628	-0.69157	1768.36	1771.37					17.8628	0.245484	1802.03	1801.08
17.914	-0.82763	1981.24	1984.93					17.914	-0.55069	1927.46	1929.2					17.914	0.379219	1725.47	1725.08					17.914	-0.522838	1767.58	1769.85					17.914	0.336994	1802.52	1801.21
17.9653	-0.76607	1981.02	1984.57					17.9653	-0.43296	1927.8	1929.16					17.9653	0.180349	1725.87	1724.21					17.9653	-0.462548	1766.3	1768.31					17.9653	0.549236	1803.73	1801.6
18.0166	-0.74385	1980.88	1984.11					18.0166	-0.47145	1927.76	1929.25					18.0166	0.302954	1726.63	1725.27					18.0166	-0.681729	1765.72	1768.68					18.0166	0.83418	1804.76	1801.52
18.0678	-0.89334	1980.59	1983.88					18.0678	-0.40639	1928.12	1929.4					18.0678	0.534791	1726.88	1725.62					18.0678	-0.835972	1766.87	1770.5					18.0678	1.17996	1805.47	1800.89
18.1191	-1.29536	1979.77	1984.19					18.1191	-0.30538	1928.59	1929.56					18.1191	0.602444	1727.12	1725.1					18.1191	-0.729463	1768.42	1771.6					18.1191	1.39447	1806.07	1800.66
18.1703	-1.40695	1979.57	1984.98					18.1703	-0.18362	1929.12	1929.7					18.1703	0.428154	1726.95	1725.11					18.1703	-0.531824	1769.89	1772.21					18.1703	1.54279	1806.28	1800.3
18.2216	-1.19555	1979.99	1985.24					18.2216	-0.21509	1929.3	1929.98					18.2216	0.232078	1726.39	1725.53					18.2216	-0.362633	1771.61	1773.19					18.2216	1.46481	1805.57	1799.89
18.2729	-0.93757	1980.51	1984.81					18.2729	-0.47686	1929.3	1930.8					18.2729	0.216678	1726.49	1725.62					18.2729	-0.271985	1772.35	1773.54					18.2729	1.28693	1804.56	1799.57
18.3241	-0.8294	1980.65	1984.28					18.3241	-0.63942	1929.52	1931.54					18.3241	0.241937	1726.86	1725.77					18.3241	-0.222512	1772.27	1773.23					18.3241	1.23674	1804.52	1799.72
18.3754	-0.87562	1980.48	1983.99					18.3754	-0.43343	1929.54	1930.9					18.3754	0.0862225	1726.56	1726.06					18.3754	-0.345745	1771.52	1773.03					18.3754	0.980418	1804.57	1800.77
18.4267	-0.86941	1981.03	1984.01					18.4267	-0.09812	1929.45	1929.76					18.4267	-0.252613	1726.07	1726.27					18.4267	-0.44929	1771.04	1772.99					18.4267	0.733766	1804.83	1801.98
18.4779	-0.66317	1982.2	1984.53					18.4779	-0.3136	1928.68	1929.67					18.4779	-0.327821	1726.46	1726.91					18.4779	-0.345969	1771.06	1772.56					18.4779	0.80023	1805.55	1802.44
18.5292	-0.39146	1982.34	1984.88					18.5292	-0.68308	1928.27	1930.43					18.5292	0.230272	1727.9	1727.55					18.5292	-0.481364	1770.56	1772.66					18.5292	0.777095	1805.32	1802.31
18.5804	-0.284	1981.01	1983.92					18.5804	-0.62145	1928.66	1930.62					18.5804	1.15717	1730.13	1727.14					18.5804	-0.649355	1770.07	1772.9					18.5804	0.606467	1804.45	1802.09
18.6317	-0.30207	1980.39	1982.15					18.6317	-0.6234	1928.23	1930.2					18.6317	2.27913	1733.51	1726.28					18.6317	-0.474295	1769.33	1771.39					18.6317	0.617035	1803.56	1801.17
18.683	-0.41954	1980.54	1981.6					18.683	-0.76847	1927.89	1930.32					18.683	3.18958	1736.39	1725.94					18.683	-0.23099	1768.89	1769.9					18.683	0.690129	1802.18	1799.51
18.7342	-0.47489	1980.2	1982.23					18.7342	-0.62359	1928.51	1930.48					18.7342	3.40251	1736.73	1725.79					18.7342	-0.173596	1769.27	1770.02					18.7342	0.641216	1800.37	1797.89
18.7855	-0.40186	1980.42	1982.12					18.7855	-0.53978	1928.88	1930.59					18.7855	3.23637	1735.23	1725.42					18.7855	-0.286447	1769.66	1770.91					18.7855	0.670036	1799.14	1796.55
18.8368	-0.29597	1981.41	1982.04					18.8368	-0.93181	1928.42	1931.37					18.8368	2.81315	1733.19	1724.48					18.8368	-0.319478	1770.71	1772.1					18.8368	0.73198	1798.77	1795.93
18.888	-0.20443	1982.62	1982.6					18.888	-1.15816	1927.68	1931.34					18.888	2.14699	1731.46	1723.85					18.888	-0.149172	1772.01	1772.66					18.888	0.568887	1798.9	1796.69
18.9393	-0.14358	1983.83	1983.44					18.9393	-0.94449	1927.15	1930.13					18.9393	1.81453	1730.66	1724.33					18.9393	-0.0923591	1772.58	1772.98					18.9393	0.223267	1798.74	1797.87
18.9905	-0.23112	1984.45	1984.41					18.9905	-0.81176	1926.78	1929.34					18.9905	1.60877	1729.89	1724.63					18.9905	-0.237831	1772.53	1773.56					18.9905	0.029024	1798.17	1798.05
19.0418	-0.22849	1984.92	1985.38					19.0418	-0.71473	1926.85	1929.1					19.0418	1.31043	1728.98	1724.55					19.0418	-0.235501	1772.01	1773.03					19.0418	-0.00583	1798.2	1798.22
19.0931	-0.27096	1984.75	1985.84					19.0931	-0.54195	1927.14	1928.85					19.0931	1.13154	1728.61	1724.63					19.0931	-0.247486	1771.48	1772.55					19.0931	-0.09866	1798.63	1799.02
19.1443	-0.61047	1983.64	1985.84					19.1443	-0.67809	1926.56	1928.7					19.1443	0.79491	1727.68	1724.85					19.1443	-0.301343	1771.08	1772.39					19.1443	-0.0573	1798.43	1798.65
19.1956	-0.7379	1982.79	1986.1					19.1956	-0.94631	1925.94	1928.93					19.1956	0.656102	1726.3	1725.04					19.1956	-0.195967	1770.94	1771.79					19.1956	0.043746	1797.89	1797.72
19.2468	-0.6181	1981.88	1985.76					19.2468	-1.05276	1925.95	1929.27					19.2468	0.657022	1725.2	1724.12					19.2468	-0.294339	1770.91	1772.2					19.2468	-0.05687	1797.89	1798.11
19.2981	-0.73324	1981	1984.37					19.2981	-1.13213	1925.82	1929.39					19.2981	0.0926932	1724.48	1723.02					19.2981	-0.567632	1770.51	1772.98					19.2981	-0.22243	1797.92	1798.78
19.3494	-1.21665	1980.41	1983.95					19.3494	-1.07318	1925.92	1929.31					19.3494	-0.345294	1724.93	1724.17					19.3494	-0.775023	1769.86	1773.23					19.3494	-0.40974	1798.38	1799.96
19.4006	-1.49357	1980.12	1985.31					19.4006	-1.11128	1925.81	1929.31					19.4006	-0.110974	1725.64	1726.08					19.4006	-0.976498	1769.18	1773.43					19.4006	-0.45912	1800.18	1801.96
19.4519	-1.30285	1980.44	1986.13					19.4519	-1.20285	1925.18	1928.98					19.4519	-0.0069827	1724.92	1726.01					19.4519	-1.0381	1769.13	1773.65					19.4519	-0.3172	1801.54	1802.78
19.5032	-1.04092	1980.97	1985.69					19.5032	-1.12148	1925.1	1928.63					19.5032	0.111607	1724.42	1724.95					19.5032	-0.941991	1769.57	1773.67					19.5032	-0.29034	1801.14	1802.27
19.5544	-1.06812	1981.01	1985.16					19.5544	-1.22488	1925.39	1929.25					19.5544	0.588027	1724.94	1724.05					19.5544	-0.827076	1769.45	1773.05					19.5544	-0.61408	1799.92	1802.3
19.6057	-1.26911	1980.39	1985.32					19.6057	-1.41543	1925.77	1930.23					19.6057	0.632299	1724.84	1722.99					19.6057	-0.778715	1768.74	1772.13					19.6057	-0.8457	1799.7	1802.99
19.6569	-1.19178	1980.56	1985.5					19.6569	-1.39949	1926.31	1930.73					19.6569	0.341335	1724.47	1722.75					19.6569	-0.724852	1767.93	1771.08					19.6569	-0.56094	1800.76	1802.94
19.7082	-0.94511	1981.47	1985.36					19.7082	-1.00348	1927.22	1930.39					19.7082	0.279056	1723.97	1723.34					19.7082	-0.586441	1767	1769.54					19.7082	-0.29844	1801.46	1802.62
19.7595	-0.91818	1981.35	1985.28					19.7595	-0.60842	1927.9	1929.82					19.7595	0.400633	1723.49	1723.05					19.7595	-0.431825	1766.52	1768.39					19.7595	-0.34203	1801.39	1802.71
19.8107	-1.13941	1980.37	1985.05					19.8107	-0.5665	1927.72	1929.51					19.8107	0.554134	1724.41	1722.16					19.8107	-0.414076	1766.7	1768.5					19.8107	-0.38922	1801.18	1802.7
19.862	-1.23084	1980.27	1984.96					19.862	-0.6026	1927.62	1929.52					19.862	0.3537	1725.37	1722.57					19.862	-0.441271	1766.9	1768.82					19.862	-0.34093	1801.22	1802.55
19.9132	-1.15382	1980.67	1985.23					19.9132	-0.69855	1927.61	1929.81					19.9132	-0.0931066	1725.06	1724.2					19.9132	-0.473366	1766.91	1768.97					19.9132	-0.07361	1802.31	1802.6
19.9645	-1.06544	1980.8	1985.32					19.9645	-0.7628	1927.5	1929.91					19.9645	-0.27301	1724.75	1725.37					19.9645	-0.626807	1766.71	1769.44					19.9645	0.330186	1803.92	1802.64
20.0158	-0.83574	1981.32	1985.09					20.0158	-0.63233	1928.02	1930.02					20.0158	-0.343964	1724.68	1725.66					20.0158	-0.636497	1766.73	1769.5					20.0158	0.318052	1804.14	1802.91
20.067	-0.80405	1981.35	1984.69					20.067	-0.59055	1928.29	1930.16					20.067	-0.0623241	1725.61	1725.83					20.067	-0.538366	1766.58	1768.91					20.067	-0.1017	1803.24	1803.63
20.1183	-1.00243	1981.11	1984.59					20.1183	-0.83648	1927.7	1930.34					20.1183	0.511317	1726.67	1725.82					20.1183	-0.441963	1765.88	1767.8					20.1183	-0.23336	1802.19	1803.1
20.1696	-1.04796	1981.22	1985.14					20.1696	-0.97899	1927.67	1930.77					20.1696	0.654943	1726.46	1724.97					20.1696	-0.38188	1765.41	1767.06					20.1696	0.356238	1801.59	1800.21
20.2208	-1.0633	1981.16	1985.44					20.2208	-0.77519	1928.6	1931.05					20.2208	0.664765	1726.62	1724.28					20.2208	-0.39449	1766.08	1767.79					20.2208	1.08024	1801.18	1797
20.2721	-1.18121	1981.09	1985.45					20.2721	-0.74168	1928.79	1931.13					20.2721	0.788562	1727.15	1724.41					20.2721	-0.367063	1767.84	1769.43					20.2721	1.2718	1800.3	1795.38
20.3233	-1.25692	1980.65	1985.84					20.3233	-1.1108	1927.6	1931.11					20.3233	0.880144	1727	1724.53					20.3233	-0.316661	1769.59	1770.97					20.3233	1.05261	1799.99	1795.92
20.3746	-1.31084	1980.49	1985.71					20.3746	-1.29751	1927.07	1931.16					20.3746	0.843148	1726.5	1724.08					20.3746	-0.159716	1771.17	1771.87					20.3746	0.71249	1800.36	1797.6
20.4259	-1.48569	1980.59	1985.78					20.4259	-0.93485	1927.94	1930.89					20.4259	0.524761	1726.1	1723.7					20.4259	0.0938252	1772.68	1772.27					20.4259	0.331394	1800.18	1798.9
20.4771	-1.47429	1980.12	1986.58					20.4771	-0.43747	1928.8	1930.18					20.4771	0.34996	1726.09	1724.36					20.4771	0.157012	1773.16	1772.48					20.4771	0.038566	1799.46	1799.31
20.5284	-1.20737	1979.97	1986.06					20.5284	-0.39728	1928.65	1929.9					20.5284	0.566328	1726.44	1724.92					20.5284	0.0954409	1773.14	1772.72					20.5284	0.102222	1798.77	1798.37
20.5797	-1.00932	1979.98	1984.83					20.5797	-0.76661	1927.99	1930.41					20.5797	0.655652	1726.7	1724.56					20.5797	0.200051	1773.69	1772.82					20.5797	0.150789	1798.24	1797.65
20.6309	-0.90559	1979.74	1984.04					20.6309	-0.96923	1927.74	1930.8					20.6309	0.487286	1726.56	1724.52					20.6309	0.347403	1774.21	1772.7					20.6309	0.17768	1798.35	1797.66
20.6822	-0.8001	1979.67	1983.38					20.6822	-1.10561	1927.28	1930.77					20.6822	0.295983	1726.45	1724.94					20.6822	0.264817	1774.25	1773.1					20.6822	0.395673	1799.04	1797.51
20.7334	-0.66272	1980.05	1982.89					20.7334	-1.36208	1926.46	1930.76					20.7334	0.330523	1726.91	1725.47					20.7334	-0.0426633	1773.42	1773.6					20.7334	0.488484	1799.1	1797.21
20.7847	-0.67948	1980.45	1982.71					20.7847	-1.11618	1926.73	1930.25					20.7847	0.663099	1727.39	1725.81					20.7847	-0.276632	1772.2	1773.41					20.7847	0.509376	1797.47	1795.5
20.836	-0.75552	1980.65	1983.18					20.836	-0.84824	1927.42	1930.1					20.836	0.751236	1727.18	1725.19					20.836	-0.269031	1771.53	1772.71					20.836	0.310254	1796.15	1794.95
20.8872	-0.88502	1980.59	1983.69					20.8872	-1.01585	1927.78	1930.98					20.8872	0.336135	1726.52	1724.69					20.8872	-0.215691	1771.19	1772.13					20.8872	0.238534	1797.95	1797.03
20.9385	-1.07933	1980.37	1984.15					20.9385	-0.87523	1928.62	1931.38					20.9385	0.0519244	1726.08	1725.4					20.9385	-0.304512	1770.64	1771.97					20.9385	0.589144	1800.56	1798.28
20.9897	-0.90879	1981.39	1984.71					20.9897	-0.54762	1928.98	1930.7					20.9897	0.0585367	1725.83	1725.91					20.9897	-0.446817	1769.9	1771.85					20.9897	0.628168	1801.49	1799.06
21.041	-0.5517	1983.21	1985.05					21.041	-0.50549	1928.74	1930.34					21.041	0.00795636	1725.26	1725.64					21.041	-0.573809	1769.8	1772.29					21.041	0.276913	1801.35	1800.28
21.0923	-0.28037	1984.42	1985.43					21.0923	-0.50126	1929.15	1930.73					21.0923	-0.0435627	1725.08	1725.23					21.0923	-0.612518	1770.17	1772.83					21.0923	0.053805	1801.35	1801.14
21.1435	-0.12613	1984.89	1985.55					21.1435	-0.55412	1929.15	1930.9					21.1435	-0.23538	1725.08	1725.23					21.1435	-0.473683	1770.43	1772.49					21.1435	0.090166	1802.27	1801.92
21.1948	-0.2412	1984.39	1985.4					21.1948	-0.79797	1928.42	1930.94					21.1948	-0.179389	1724.95	1725.86					21.1948	-0.275903	1770.57	1771.77					21.1948	0.426878	1803.59	1801.93
21.2461	-0.41245	1983.26	1985.36					21.2461	-0.775	1928.38	1930.82					21.2461	0.328186	1725.19	1725.55					21.2461	-0.309339	1769.97	1771.31					21.2461	0.833057	1804.5	1801.26
21.2973	-0.4432	1982.44	1984.92					21.2973	-0.62661	1928.56	1930.54					21.2973	0.506426	1725.19	1724.1					21.2973	-0.449598	1769.3	1771.26					21.2973	0.860251	1804.6	1801.26
21.3486	-0.64856	1981.69	1984.23					21.3486	-0.71529	1928.24	1930.49					21.3486	0.437778	1725.31	1723.51					21.3486	-0.44917	1769.29	1771.25					21.3486	0.905986	1804.77	1801.25
21.3998	-1.07795	1980.32	1984.3					21.3998	-0.74332	1928.06	1930.41					21.3998	0.181613	1725.25	1723.86					21.3998	-0.578675	1769.46	1771.98					21.3998	0.973077	1804.72	1800.94
21.4511	-1.09623	1980.08	1984.66					21.4511	-0.63975	1928.11	1930.13					21.4511	-0.0077358	1725.22	1724.65					21.4511	-0.675987	1770.42	1773.36					21.4511	0.56724	1803.58	1801.38
21.5024	-0.739	1981.31	1984.49					21.5024	-0.79192	1927.33	1929.83					21.5024	0.217678	1725.72	1725.24					21.5024	-0.644266	1771.27	1774.08					21.5024	0.364034	1803.25	1801.84
21.5536	-0.58126	1981.96	1984.29					21.5536	-0.94928	1926.14	1929.14					21.5536	0.106155	1725.83	1725					21.5536	-0.805754	1770.68	1774.19					21.5536	0.649036	1804.06	1801.54
21.6049	-0.59186	1981.77	1984.31					21.6049	-0.91082	1925.76	1928.63					21.6049	0.0106234	1725.94	1725.47					21.6049	-0.871283	1770.09	1773.88					21.6049	0.857693	1804.31	1800.98
21.6562	-0.67646	1981.16	1984.15					21.6562	-0.95236	1926.02	1929.03					21.6562	0.256234	1726.26	1725.9					21.6562	-0.74978	1770.24	1773.51					21.6562	0.849474	1803.64	1800.35
21.7074	-0.90385	1980.49	1983.88					21.7074	-0.96738	1926.11	1929.16					21.7074	0.0929917	1725.68	1725.41					21.7074	-0.61997	1770.61	1773.31					21.7074	1.29565	1803.07	1798.05
21.7587	-1.02346	1980.22	1984.13					21.7587	-1.18011	1925.37	1929.09					21.7587	-0.198619	1724.71	1725.37					21.7587	-0.574641	1771.08	1773.58					21.7587	2.1155	1803.26	1795.08
21.8099	-0.9943	1979.83	1984.34					21.8099	-1.32147	1924.97	1929.13					21.8099	0.00869498	1724.71	1725.37					21.8099	-0.538983	1771.76	1774.11					21.8099	2.00739	1803.03	1795.26
21.8612	-1.06934	1979.35	1983.83					21.8612	-1.04264	1925.54	1928.82					21.8612	0.217158	1724.15	1724.68					21.8612	-0.193265	1772.83	1773.68					21.8612	1.23106	1803.06	1798.3
21.9125	-0.89344	1980.01	1983.65					21.9125	-0.86355	1926.41	1929.13					21.9125	-0.0827062	1722.92	1723.43					21.9125	0.0738227	1773.56	1773.24					21.9125	0.948259	1805.15	1801.47
21.9637	-0.57469	1980.71	1983.61					21.9637	-0.89382	1927.32	1930.14					21.9637	-0.328953	1722.99	1723.19					21.9637	-0.0329153	1773.35	1773.5					21.9637	0.830231	1806.7	1803.47
22.015	-0.54399	1980.27	1983.03					22.015	-0.73029	1928.33	1930.63					22.015	-0.156804	1723.31	1724.08					22.015	-0.133111	1772.84	1773.42					22.015	0.535998	1806.3	1804.21
22.0662	-0.43497	1980.79	1982.45					22.0662	-0.38318	1929.12	1930.33					22.0662	0.105534	1722.87	1723.83					22.0662	-0.361816	1771.91	1773.48					22.0662	0.415704	1806.01	1804.4
22.1175	-0.15714	1982.51	1982.54					22.1175	-0.30034	1928.85	1929.8					22.1175	0.243868	1722.15	1722.52					22.1175	-0.748464	1770.82	1774.08					22.1175	0.201992	1805.7	1804.92
22.1688	-0.13817	1983.16	1983.14					22.1688	-0.42911	1928.2	1929.56					22.1688	0.194065	1720.81	1721.34					22.1688	-0.890202	1770.57	1774.44					22.1688	-0.00124	1805.3	1805.3
22.22	-0.30386	1982.94	1983.72					22.22	-0.4814	1928.02	1929.54					22.22	-0.0884399	1720.35	1720.17					22.22	-0.821537	1770.53	1774.11					22.22	0.090398	1805.21	1804.86
22.2713	-0.12632	1983.33	1984.16					22.2713	-0.4538	1928.15	1929.59					22.2713	-0.245947	1722.41	1720.65					22.2713	-0.631459	1770.21	1772.96					22.2713	0.157383	1804.8	1804.19
22.3226	0.167373	1983.08	1983.84					22.3226	-0.38537	1928.53	1929.74					22.3226	-0.0992972	1724.33	1723.22					22.3226	-0.556926	1769.31	1771.74					22.3226	0.165453	1804.46	1803.82
22.3738	0.043893	1981.21	1982.41					22.3738	-0.49432	1928.41	1929.97					22.3738	-0.178298	1724.6	1724.66					22.3738	-0.639932	1769	1771.79					22.3738	0.256106	1804.42	1803.43
22.4251	-0.33174	1979.65	1981.04					22.4251	-0.78651	1927.8	1930.28					22.4251	-0.114697	1725.27	1725.19					22.4251	-0.432411	1770.85	1772.73					22.4251	0.427561	1804.09	1802.43
22.4763	-0.59142	1979.09	1980.98					22.4763	-0.82246	1927.72	1930.32					22.4763	0.250885	1726.52	1725.66					22.4763	-0.0728556	1772.83	1773.14					22.4763	0.497161	1803.79	1801.86
22.5276	-0.77454	1979.01	1981.47					22.5276	-0.6106	1928.08	1930					22.5276	0.19837	1726.39	1725.68					22.5276	0.0731244	1773.08	1772.76					22.5276	0.422348	1804.08	1802.44
22.5789	-0.9355	1979.39	1982.12					22.5789	-0.65388	1928.13	1930.19					22.5789	0.0384859	1725.17	1725.73					22.5789	0.0954537	1772.98	1772.56					22.5789	0.366531	1804.18	1802.76
22.6301	-0.80496	1980.82	1983.16					22.6301	-0.88793	1927.75	1930.56					22.6301	0.0534964	1724.5	1725.04					22.6301	0.130459	1773.45	1772.89					22.6301	0.2166	1803.51	1802.66
22.6814	-0.51679	1982.77	1984.06					22.6814	-0.75112	1927.97	1930.34					22.6814	0.0570938	1724.75	1724.32					22.6814	0.572234	1775.45	1772.96					22.6814	0.056639	1802.91	1802.69
22.7326	-0.32227	1984.1	1984.86					22.7326	-0.46026	1928.43	1929.88					22.7326	0.0789196	1725.1	1724.56					22.7326	1.63398	1780.13	1773.02					22.7326	0.127058	1803.76	1803.26
22.7839	-0.27384	1984.44	1985.4					22.7839	-0.56504	1927.93	1929.71					22.7839	-0.0638909	1724.9	1724.84					22.7839	3.03839	1786.11	1772.89					22.7839	0.333608	1805.3	1804
22.8352	-0.59371	1983.83	1985.54					22.8352	-0.83495	1927.59	1930.23					22.8352	-0.116275	1725.12	1725.11					22.8352	4.25754	1791.23	1772.71					22.8352	0.50676	1805.39	1803.42
22.8864	-0.89257	1983.22	1986.22					22.8864	-0.90453	1928.13	1930.98					22.8864	-0.121819	1725.57	1725.51					22.8864	4.94983	1794.59	1773.05					22.8864	0.674126	1804.78	1802.16
22.9377	-0.86328	1982.94	1986.82					22.9377	-0.96819	1928.31	1931.37					22.9377	-0.457854	1725.16	1725.98					22.9377	5.36249	1796.45	1773.11					22.9377	0.888333	1804.59	1801.14
22.989	-0.93983	1982.26	1986.42					22.989	-1.05784	1927.73	1931.07					22.989	-0.488665	1725.01	1726.68					22.989	5.34255	1796.25	1773					22.989	0.98822	1804.36	1800.53
23.0402	-0.96153	1981.4	1986.04					23.0402	-0.80496	1927.72	1930.26					23.0402	-0.290443	1725.47	1726.64					23.0402	4.82585	1794.59	1773.58					23.0402	0.902411	1804.23	1800.73
23.0915	-0.81253	1980.94	1985.27					23.0915	-0.43306	1928.48	1929.85					23.0915	-0.255395	1725.46	1726.44					23.0915	4.43342	1793.19	1773.89					23.0915	0.685539	1804.14	1801.48
23.1427	-0.80768	1981.06	1984.21					23.1427	-0.495	1928.22	1929.79					23.1427	0.0288767	1725.29	1726.31					23.1427	4.2369	1791.58	1773.14					23.1427	0.510271	1803.98	1802
23.194	-0.78425	1982.08	1984.31					23.194	-0.78066	1926.85	1929.31					23.194	0.394467	1725.57	1725.2					23.194	3.89514	1789.44	1772.49					23.194	0.387689	1803.94	1802.44
23.2453	-0.56083	1983.26	1985.24					23.2453	-0.72465	1926.75	1929.03					23.2453	0.293685	1725.6	1724.26					23.2453	3.53382	1787.55	1772.18					23.2453	0.304032	1803.96	1802.78
23.2965	-0.40411	1983.71	1985.52					23.2965	-0.62642	1927.21	1929.18					23.2965	-0.134421	1724.98	1724.62					23.2965	3.48325	1787.14	1771.99					23.2965	0.357922	1804.49	1803.1
23.3478	-0.33681	1983.74	1985.34					23.3478	-0.77677	1926.35	1928.8					23.3478	-0.511781	1724.35	1725.42					23.3478	3.62282	1787.7	1771.94					23.3478	0.477564	1805.44	1803.59
23.3991	-0.24024	1983.8	1985.09					23.3991	-0.89861	1925.43	1928.26					23.3991	-0.620055	1724.37	1726.06					23.3991	3.64814	1787.49	1771.63					23.3991	0.593246	1805.8	1803.49
23.4503	-0.48557	1983.25	1984.77					23.4503	-0.86897	1925.37	1928.11					23.4503	-0.434172	1724.93	1726.43					23.4503	3.57922	1786.71	1771.15					23.4503	0.653538	1805.44	1802.9
23.5016	-0.77901	1982.28	1985.2					23.5016	-0.87563	1925.34	1928.1					23.5016	-0.411681	1725.22	1726.38					23.5016	3.29718	1785.36	1771.02					23.5016	0.78896	1805	1801.94
23.5528	-0.68262	1982.21	1985.42					23.5528	-0.88251	1925.29	1928.07					23.5528	-0.490817	1725.01	1726.59					23.5528	2.91351	1783.71	1771.04					23.5528	0.923886	1804.31	1800.73
23.6041	-0.42126	1983.21	1984.96					23.6041	-0.75647	1925.94	1928.33					23.6041	-0.379658	1724.63	1726.64					23.6041	2.70199	1782.63	1770.89					23.6041	0.952038	1803.92	1800.23
23.6554	-0.07545	1984.85	1984.91					23.6554	-0.83494	1926.62	1929.25					23.6554	-0.272983	1724.65	1725.89					23.6554	2.3125	1780.7	1770.64					23.6554	0.991898	1804.01	1800.17
23.7066	0.399933	1986.6	1985.15					23.7066	-0.99198	1926.99	1930.12					23.7066	-0.099287	1725.01	1725.55					23.7066	1.74415	1777.68	1770.1					23.7066	0.793597	1803.53	1800.45
23.7579	0.717845	1987.39	1984.99					23.7579	-0.88703	1927.34	1930.14					23.7579	0.127843	1724.65	1725.34					23.7579	1.43897	1775.12	1768.87					23.7579	0.736176	1803.03	1800.17
23.8091	0.467712	1986.79	1984.5					23.8091	-0.87034	1927.24	1929.99					23.8091	0.222247	1723.72	1724.23					23.8091	1.42594	1773.75	1767.56					23.8091	0.894234	1802.78	1799.31
23.8604	-0.0243	1985.52	1984.9					23.8604	-1.03741	1926.91	1930.19					23.8604	0.266738	1723.35	1722.98					23.8604	1.58332	1773.97	1767.1					23.8604	0.680654	1802.31	1799.67
23.9117	-0.19943	1984.6	1985.62					23.9117	-1.07376	1927	1930.39					23.9117	0.362632	1723.62	1722.46					23.9117	1.67565	1774.75	1767.48					23.9117	0.558788	1802.36	1800.19
23.9629	-0.02216	1985.3	1985.4					23.9629	-1.1811	1926.77	1930.5					23.9629	0.15802	1723.46	1722.42					23.9629	1.57253	1774.82	1767.99					23.9629	0.687986	1802.74	1800.07
24.0142	0.038694	1986.08	1985.39					24.0142	-1.13262	1926.5	1930.07					24.0142	-0.237037	1722.84	1722.93					24.0142	1.35066	1774.05	1768.19					24.0142	0.893255	1802.63	1799.17
24.0655	-0.21642	1985.18	1985.92					24.0655	-0.61092	1927.35	1929.27					24.0655	-0.175549	1722.41	1723.63					24.0655	1.17562	1773.2	1768.1					24.0655	0.921316	1801.91	1798.34
24.1167	-0.61893	1983.96	1986.05					24.1167	-0.38655	1928.3	1929.52					24.1167	0.319283	1722.06	1722.99					24.1167	1.15612	1772.48	1767.47					24.1167	0.828245	1801.24	1798.03
24.168	-0.96076	1983.45	1986.45					24.168	-0.65797	1928.33	1930.41					24.168	0.677516	1721.89	1721					24.168	1.13086	1771.83	1766.92					24.168	1.05034	1800.74	1796.68
24.2192	-1.08281	1983.36	1987.33					24.2192	-0.75238	1927.86	1930.23					24.2192	0.569316	1721.52	1719.65					24.2192	0.880408	1770.34	1766.52					24.2192	1.05134	1799.3	1795.23
24.2705	-0.99956	1983.4	1987.73					24.2705	-0.71143	1927.53	1929.77					24.2705	0.490264	1721.75	1719.63					24.2705	0.386472	1767.42	1765.74					24.2705	0.693427	1798.75	1796.07
24.3218	-0.70228	1983.78	1987.43					24.3218	-0.71203	1927.34	1929.58					24.3218	0.415089	1722.54	1720.12					24.3218	-0.0842135	1765.27	1765.64					24.3218	0.673427	1800.2	1797.59
24.373	-0.51702	1983.69	1986.62					24.373	-0.79963	1927.02	1929.54					24.373	0.00267097	1722.21	1721.16					24.373	-0.343099	1764.88	1766.36					24.373	0.945108	1801.21	1797.55
24.4243	-0.62	1983.19	1985.77					24.4243	-0.99151	1926.84	1929.96					24.4243	-0.247833	1721.93	1722.2					24.4243	-0.324698	1765.59	1767					24.4243	0.957254	1801.98	1798.27
24.4756	-0.81508	1982.88	1985.68					24.4756	-1.05304	1926.81	1930.13					24.4756	-0.175177	1722.57	1722.75					24.4756	-0.115441	1767.27	1767.78					24.4756	0.921363	1803.38	1799.81
24.5268	-0.9109	1982.52	1986.16					24.5268	-1.203	1926.68	1930.47					24.5268	-0.0464781	1723.08	1723.15					24.5268	-0.0133784	1769.03	1769.09					24.5268	0.995861	1804.35	1800.48
24.5781	-1.00043	1982.27	1986.19					24.5781	-1.24311	1926.72	1930.64					24.5781	0.0903563	1723.26	1723.23					24.5781	0.0286249	1770.05	1769.93					24.5781	1.05462	1804.95	1800.86
24.6293	-1.1292	1981.91	1986.3					24.6293	-0.82473	1927.29	1929.89					24.6293	0.137751	1723.25	1722.96					24.6293	0.105156	1770.38	1769.92					24.6293	1.08995	1805.24	1801.01
24.6806	-1.07234	1981.34	1986.47					24.6806	-0.53401	1927.81	1929.49					24.6806	0.193812	1723.34	1722.8					24.6806	0.0673871	1770.63	1770.33					24.6806	1.27006	1805.25	1800.33
24.7319	-0.79454	1980.84	1985.66					24.7319	-0.58913	1927.94	1929.8					24.7319	0.385962	1723.7	1722.69					24.7319	0.036864	1771.18	1771.02					24.7319	1.49955	1804.99	1799.18
24.7831	-0.43319	1980.44	1984.04					24.7831	-0.39991	1928.93	1930.19					24.7831	0.368453	1723.86	1722.42					24.7831	-0.001293	1771.14	1771.14					24.7831	1.10661	1803.77	1799.48
24.8344	-0.46711	1979.46	1982.18					24.8344	0.096778	1930.53	1930.22					24.8344	0.472394	1724.58	1722.64					24.8344	-0.237537	1770	1771.03					24.8344	0.477822	1802.4	1800.55
24.8856	-0.62728	1979.05	1981.34					24.8856	0.224219	1930.51	1929.8					24.8856	1.01966	1725.93	1723.01					24.8856	-0.445035	1768.59	1770.52					24.8856	0.494798	1801.71	1799.79
24.9369	-0.43411	1979.77	1981.57					24.9369	-0.05674	1929.52	1929.7					24.9369	1.35818	1725.87	1722.55					24.9369	-0.397448	1767.8	1769.53					24.9369	0.766064	1800.99	1798.02
24.9882	-0.44772	1980.15	1981.51					24.9882	-0.33697	1929.02	1930.09					24.9882	1.10737	1724.48	1721.37					24.9882	-0.381971	1767.47	1769.12					24.9882	0.633302	1800.21	1797.75
25.0394	-0.84464	1980.16	1981.95					25.0394	-0.60305	1928.21	1930.11					25.0394	0.622486	1723.27	1720.81					25.0394	-0.352811	1767.74	1769.28					25.0394	0.500069	1800.63	1798.69
25.0907	-1.09522	1980.28	1983.56					25.0907	-0.76081	1927.72	1930.12					25.0907	0.528855	1722.72	1721.21					25.0907	-0.135477	1767.91	1768.49					25.0907	0.384737	1801.47	1799.98
25.142	-0.8982	1980.88	1984.69					25.142	-0.65371	1928.29	1930.35					25.142	0.668632	1721.89	1720.97					25.142	-0.164493	1767.27	1767.99					25.142	0.3204	1801.04	1799.8
25.1932	-0.62041	1981.71	1984.5					25.1932	-0.47804	1928.44	1929.95					25.1932	0.668457	1720.46	1719.67					25.1932	-0.345897	1767.55	1769.06					25.1932	0.481239	1800.01	1798.15
25.2445	-0.67031	1981.85	1984.2					25.2445	-0.40015	1928.02	1929.28					25.2445	0.32627	1720.29	1718.25					25.2445	-0.32281	1768.01	1769.41					25.2445	0.430648	1799.51	1797.85
25.2957	-0.88144	1981.17	1984.55					25.2957	-0.40307	1927.79	1929.06					25.2957	-0.154993	1722.66	1719.22					25.2957	-0.382391	1768.03	1769.69					25.2957	0.469593	1799.81	1797.99
25.347	-1.03304	1980.64	1984.72					25.347	-0.52175	1927.63	1929.28					25.347	0.00019521	1725.72	1723.18					25.347	-0.386142	1768.92	1770.6					25.347	0.519463	1800.13	1798.12
25.3983	-1.14599	1980.52	1984.81					25.3983	-0.59645	1927.64	1929.52					25.3983	0.391155	1726.31	1725.72					25.3983	-0.222307	1769.79	1770.76					25.3983	0.458826	1800.2	1798.42
25.4495	-1.10697	1980.67	1985.13					25.4495	-0.78139	1927.26	1929.73					25.4495	0.45452	1725.21	1725.01					25.4495	-0.250096	1770.08	1771.16					25.4495	0.509617	1800.38	1798.4
25.5008	-0.92285	1981.03	1985.13					25.5008	-1.02083	1927.05	1930.27					25.5008	0.183299	1724.6	1723.7					25.5008	-0.423351	1769.89	1771.73					25.5008	0.431505	1800.17	1798.5
25.5521	-0.74304	1981.42	1984.74					25.5521	-0.92489	1927.62	1930.54					25.5521	-0.226231	1724.63	1723.99					25.5521	-0.533039	1769.77	1772.09					25.5521	0.349277	1799.7	1798.35
25.6033	-0.54483	1982.31	1984.41					25.6033	-0.65734	1927.98	1930.05					25.6033	-0.293289	1725.43	1725.38					25.6033	-0.423171	1769.92	1771.76					25.6033	0.411419	1799.6	1798
25.6546	-0.27623	1983.35	1984.5					25.6546	-0.56715	1928.06	1929.85					25.6546	-0.241959	1726.12	1726.41					25.6546	-0.331419	1769.67	1771.11					25.6546	0.525337	1800.04	1798
25.7058	-0.04604	1983.68	1984.46					25.7058	-0.83133	1927.65	1930.28					25.7058	0.0284041	1726.62	1726.92					25.7058	-0.367874	1769.79	1771.39					25.7058	0.537263	1800.83	1798.75
25.7571	-0.10442	1983.67	1983.87					25.7571	-0.99762	1927.27	1930.42					25.7571	0.431607	1727.5	1726.53					25.7571	-0.363237	1770.01	1771.59					25.7571	0.589215	1801.52	1799.23
25.8084	-0.47419	1983.24	1984.1					25.8084	-0.88459	1927.18	1929.98					25.8084	0.813241	1728.94	1726.06					25.8084	-0.292664	1770.31	1771.58					25.8084	0.889974	1801.9	1798.45
25.8596	-0.81211	1982.43	1985.15					25.8596	-0.64532	1926.31	1928.35					25.8596	1.36399	1730.89	1726.23					25.8596	-0.0977406	1771.4	1771.82					25.8596	0.996216	1801.93	1798.07
25.9109	-0.8122	1982.16	1985.7					25.9109	-0.71409	1924.44	1926.69					25.9109	1.43235	1731.06	1726.35					25.9109	0.0623442	1772.19	1771.92					25.9109	0.833551	1801.3	1798.07
25.9621	-0.8716	1981.42	1985.43					25.9621	-0.90595	1923.56	1926.41					25.9621	0.96007	1729.6	1726.3					25.9621	0.0429518	1771.98	1771.79					25.9621	0.930939	1800.48	1796.88
26.0134	-1.19031	1980.2	1984.93					26.0134	-0.622	1924.5	1926.46					26.0134	0.452375	1728.23	1726.41					26.0134	-0.17131	1770.9	1771.64					26.0134	1.17523	1800.79	1796.24
26.0647	-1.14784	1980.38	1984.99					26.0647	-0.72607	1924.94	1927.22					26.0647	0.337921	1727.33	1726.73					26.0647	-0.456254	1769.66	1771.64					26.0647	1.14372	1801.54	1797.12
26.1159	-0.8095	1981.66	1985					26.1159	-0.95114	1925.12	1928.12					26.1159	0.549349	1727.13	1726.21					26.1159	-0.671753	1768.9	1771.82					26.1159	1.16843	1801.7	1797.18
26.1672	-0.58354	1982.66	1984.92					26.1672	-0.73266	1925.62	1927.93					26.1672	0.66132	1727.16	1725.3					26.1672	-0.801848	1768.15	1771.64					26.1672	1.21124	1801.85	1797.16
26.2185	-0.48032	1982.98	1985.01					26.2185	-0.5253	1925.93	1927.58					26.2185	0.702789	1727.41	1724.96					26.2185	-0.774486	1767.78	1771.15					26.2185	0.786288	1801.89	1798.84
26.2697	-0.6024	1982.71	1984.91					26.2697	-0.48514	1926.36	1927.89					26.2697	0.651139	1728.02	1725.08					26.2697	-0.649976	1768.46	1771.29					26.2697	0.349177	1801.91	1800.56
26.321	-0.64839	1982.78	1985.14					26.321	-0.61201	1926.52	1928.45					26.321	0.696723	1728.43	1725.86					26.321	-0.524418	1769	1771.28					26.321	0.261256	1802.65	1801.63
26.3722	-0.54196	1982.63	1985.4					26.3722	-0.64085	1926.5	1928.52					26.3722	0.63762	1727.92	1726.11					26.3722	-0.54613	1768.82	1771.2					26.3722	0.383803	1803.72	1802.23
26.4235	-0.80228	1981.08	1984.81					26.4235	-0.61499	1926.43	1928.37					26.4235	0.389405	1727.19	1725.8					26.4235	-0.562651	1769.15	1771.59					26.4235	0.664791	1804.36	1801.78
26.4748	-1.15715	1979.42	1984.31					26.4748	-0.76683	1925.81	1928.23					26.4748	0.552013	1727.58	1725.9					26.4748	-0.259184	1770.25	1771.38					26.4748	0.769584	1804.46	1801.47
26.526	-1.12509	1979.36	1984.08					26.526	-0.83875	1925.19	1927.84					26.526	0.639252	1727.93	1725.75					26.526	0.0123068	1771.32	1771.27					26.526	0.717832	1804.75	1801.96
26.5773	-1.07328	1980.06	1983.89					26.5773	-0.68364	1925.19	1927.34					26.5773	0.419055	1727.32	1725.81					26.5773	0.0216968	1771.64	1771.55					26.5773	0.930193	1805.6	1801.99
26.6285	-1.03522	1980.59	1984.38					26.6285	-0.76329	1924.86	1927.26					26.6285	0.388189	1726.68	1725.93					26.6285	-0.0587777	1771.11	1771.37					26.6285	1.22884	1805.88	1801.11
26.6798	-0.87472	1981.73	1984.76					26.6798	-0.72747	1924.96	1927.25					26.6798	0.238949	1726.26	1725.39					26.6798	-0.338783	1770.06	1771.53					26.6798	1.3419	1805.41	1800.21
26.7311	-0.77373	1982.74	1985.25					26.7311	-0.45589	1925.94	1927.38					26.7311	0.0484275	1726.26	1725.46					26.7311	-0.603123	1769.35	1771.97					26.7311	1.23165	1804.86	1800.09
26.7823	-0.70722	1982.35	1985.86					26.7823	-0.68195	1926.33	1928.48					26.7823	-0.117177	1726.17	1726.1					26.7823	-0.400154	1770.14	1771.88					26.7823	0.993675	1804.02	1800.17
26.8336	-0.71676	1981.01	1985.19					26.8336	-0.90305	1926.63	1929.48					26.8336	-0.380181	1725.66	1726.56					26.8336	0.194551	1772.03	1771.19					26.8336	0.836637	1803.87	1800.63
26.8849	-0.80067	1980.08	1983.9					26.8849	-0.72152	1927.05	1929.33					26.8849	-0.303002	1725.76	1726.93					26.8849	0.686978	1773.55	1770.57					26.8849	0.905738	1804.77	1801.25
26.9361	-0.82328	1980.02	1983.3					26.9361	-0.64803	1926.84	1928.88					26.9361	-0.146209	1726.19	1726.77					26.9361	0.891361	1775.11	1771.24					26.9361	1.03156	1805.14	1801.13
26.9874	-0.81327	1980.52	1983.34					26.9874	-0.71156	1926.16	1928.4					26.9874	-0.141438	1726.43	1726.68					26.9874	1.10952	1776.81	1771.99					26.9874	1.00984	1805.01	1801.09
27.0386	-0.85862	1981.33	1983.79					27.0386	-0.67122	1925.06	1927.17					27.0386	0.00363708	1726.86	1726.91					27.0386	1.12699	1776.25	1771.35					27.0386	1.22842	1805.26	1800.5
27.0899	-0.77305	1982.15	1984.79					27.0899	-0.59005	1923.96	1925.82					27.0899	0.232389	1727.22	1726.85					27.0899	0.699356	1773.74	1770.7					27.0899	1.7935	1806.14	1799.18
27.1412	-0.63057	1982.71	1985.26					27.1412	-0.62435	1923.84	1925.81					27.1412	0.242421	1727.11	1726.45					27.1412	0.404032	1772.5	1770.75					27.1412	1.98449	1806.96	1799.27
27.1924	-0.66815	1982.79	1985.25					27.1924	-0.57084	1925.08	1926.88					27.1924	0.129097	1727.16	1726.3					27.1924	0.559201	1772.94	1770.51					27.1924	1.67905	1807.03	1800.51
27.2437	-0.72493	1982.56	1985.48					27.2437	-0.49233	1926.01	1927.57					27.2437	0.428738	1728.11	1726.73					27.2437	0.637095	1773.01	1770.24					27.2437	1.36503	1807.13	1801.83
27.295	-0.65724	1982.47	1985.48					27.295	-0.59915	1925.46	1927.35					27.295	0.675095	1728.45	1726.68					27.295	0.444958	1772.64	1770.71					27.295	1.33114	1807.53	1802.37
27.3462	-0.60347	1982.27	1985.12					27.3462	-0.70709	1925.21	1927.44					27.3462	0.365387	1727.21	1726.2					27.3462	0.234858	1772.49	1771.47					27.3462	1.45774	1807.53	1801.87
27.3975	-0.7272	1981.81	1984.7					27.3975	-0.65454	1926	1928.07					27.3975	0.172465	1725.85	1725.99					27.3975	0.062817	1772.19	1771.91					27.3975	1.20143	1806.96	1802.3
27.4487	-0.76181	1981.89	1984.74					27.4487	-0.4245	1926.9	1928.23					27.4487	0.236526	1725.25	1725.28					27.4487	0.0736918	1772.06	1771.73					27.4487	0.9715	1806.72	1802.95
27.5	-0.7734	1981.93	1984.95					27.5	-0.21449	1927.77	1928.45					27.5	0.279662	1725.45	1724.46					27.5	0.114607	1772.05	1771.55					27.5	1.30774	1807.18	1802.11
27.5513	-0.87176	1981.75	1985.05					27.5513	-0.09211	1928.65	1928.94					27.5513	0.335605	1726.24	1724.52					27.5513	-0.0180245	1771.67	1771.75					27.5513	1.65799	1807.65	1801.22
27.6025	-0.76223	1982.28	1985.26					27.6025	-0.01013	1929.16	1929.19					27.6025	0.0514352	1726.6	1725.12					27.6025	-0.0044436	1770.89	1770.91					27.6025	1.68848	1807.53	1800.97
27.6538	-0.53386	1983.26	1985.35					27.6538	0.16098	1929.75	1929.24					27.6538	-0.595726	1725.65	1726.43					27.6538	0.120906	1769.61	1769.09					27.6538	1.54078	1806.46	1800.48
27.705	-0.45229	1984.01	1985.41					27.705	0.318358	1930.22	1929.22					27.705	-0.918416	1724.22	1727.63					27.705	0.0318395	1768.17	1768.03					27.705	1.33267	1804.69	1799.53
27.7563	-0.45231	1984.44	1985.83					27.7563	0.265398	1930.13	1929.29					27.7563	-0.749497	1724.35	1727.27					27.7563	-0.25337	1767.52	1768.62					27.7563	1.20088	1803.41	1798.75
27.8076	-0.17501	1985.35	1986.26					27.8076	0.228358	1929.9	1929.18					27.8076	-0.325105	1725.78	1726.84					27.8076	-0.370946	1768.2	1769.81					27.8076	1.09122	1803.19	1798.96
27.8588	0.294232	1986.9	1986.06					27.8588	0.259061	1929.57	1928.76					27.8588	0.0788488	1726.51	1726.86					27.8588	-0.100861	1770.37	1770.81					27.8588	0.876474	1802.76	1799.36
27.9101	0.582968	1988.21	1985.72					27.9101	0.38072	1929.5	1928.3					27.9101	0.0664106	1726.33	1726.25					27.9101	0.220567	1772.58	1771.62					27.9101	0.745403	1801.92	1799.04
27.9614	0.599673	1988.12	1985.86					27.9614	0.442615	1929.23	1927.83					27.9614	-0.184203	1725.59	1726.11					27.9614	0.277015	1772.58	1771.38					27.9614	0.878169	1801.7	1798.3
28.0126	0.486772	1987.43	1985.7					28.0126	0.144032	1927.68	1927.23					28.0126	-0.238356	1724.74	1726.2					28.0126	0.14776	1771.73	1771.09					28.0126	0.821509	1801.57	1798.38
28.0639	0.25272	1986.9	1985.47					28.0639	-0.33787	1925.95	1927.02					28.0639	-0.187691	1724.46	1725.54					28.0639	0.0318405	1771.63	1771.49					28.0639	0.445835	1801.25	1799.52
28.1151	-0.10181	1985.49	1985.88					28.1151	-0.66457	1925.86	1927.95					28.1151	-0.134676	1724.79	1725.08					28.1151	-0.041353	1771.55	1771.73					28.1151	0.321376	1801.32	1800.07
28.1664	-0.40118	1984	1985.9					28.1664	-0.70384	1926.54	1928.76					28.1664	-0.015139	1725.34	1725.24					28.1664	-0.114285	1771.36	1771.86					28.1664	0.320374	1802.05	1800.8
28.2177	-0.60778	1983.42	1985.62					28.2177	-0.54622	1926.46	1928.18					28.2177	0.0922232	1725.3	1725.39					28.2177	-0.108583	1771.96	1772.44					28.2177	0.117082	1802.73	1802.27
28.2689	-0.60025	1983.49	1985.87					28.2689	-0.54735	1925.93	1927.65					28.2689	0.0800245	1725.01	1724.99					28.2689	-0.0279573	1772.75	1772.87					28.2689	-0.03436	1802.7	1802.83
28.3202	-0.34083	1983.95	1985.9					28.3202	-0.72335	1925.31	1927.59					28.3202	0.012076	1725.2	1724.74					28.3202	0.0128921	1772.44	1772.38					28.3202	0.14033	1802.17	1801.62
28.3715	-0.25351	1983.92	1985.33					28.3715	-0.82962	1924.67	1927.29					28.3715	0.0350912	1725.27	1725.16					28.3715	-0.0840674	1771.37	1771.73					28.3715	0.141989	1800.62	1800.07
28.4227	-0.44208	1983.18	1984.94					28.4227	-0.82197	1924.36	1926.95					28.4227	-0.0134126	1724.81	1725.16					28.4227	-0.254331	1770.58	1771.69					28.4227	-0.28296	1798.9	1800
28.474	-0.3915	1983.02	1984.96					28.474	-0.819	1924.51	1927.09					28.474	-0.0763974	1724.77	1724.85					28.474	-0.161398	1771.07	1771.77					28.474	-0.44199	1799.15	1800.87
28.5252	-0.2692	1983.25	1984.6					28.5252	-0.92387	1924.79	1927.7					28.5252	0.122649	1725.52	1725.03					28.5252	0.0316455	1771.46	1771.32					28.5252	-0.3129	1800.47	1801.69
28.5765	-0.25252	1983.3	1984.33					28.5765	-0.9689	1924.7	1927.76					28.5765	0.362123	1725.79	1725.11					28.5765	-0.0692051	1770.5	1770.8					28.5765	-0.20529	1800.78	1801.58
28.6278	-0.24808	1983.41	1984.32					28.6278	-0.89408	1924.49	1927.31					28.6278	0.294894	1724.9	1724.58					28.6278	-0.334433	1769.81	1771.27					28.6278	-0.04774	1800.64	1800.83
28.679	-0.42215	1983.47	1984.41					28.679	-0.7552	1924.84	1927.22					28.679	-0.0332197	1723.79	1723.92					28.679	-0.466361	1769.89	1771.92					28.679	0.115258	1800.77	1800.32
28.7303	-0.38122	1983.84	1985.17					28.7303	-0.66147	1925.53	1927.61					28.7303	-0.351421	1723.38	1723.9					28.7303	-0.392759	1769.74	1771.45					28.7303	0.049237	1800.28	1800.09
28.7815	-0.33936	1983.9	1985.38					28.7815	-0.456	1926.14	1927.58					28.7815	-0.599065	1723.27	1724.55					28.7815	-0.316241	1769.22	1770.59					28.7815	-0.18229	1800.25	1800.96
28.8328	-0.66799	1983.79	1985.27					28.8328	-0.29728	1926.2	1927.14					28.8328	-0.466014	1723.88	1725.27					28.8328	-0.326378	1768.8	1770.22					28.8328	0.093306	1800.68	1800.32
28.8841	-0.71331	1984.3	1986.48					28.8841	-0.30478	1925.98	1926.94					28.8841	-0.0194549	1724.9	1725.43					28.8841	-0.181991	1769.38	1770.17					28.8841	0.618265	1799.43	1797.04
28.9353	-0.47386	1984.32	1987.17					28.9353	-0.13173	1926.21	1926.62					28.9353	0.19326	1725.11	1724.97					28.9353	0.145847	1770.49	1769.85					28.9353	0.628105	1797.94	1795.51
28.9866	-0.33909	1983.85	1986.23					28.9866	0.175792	1926.7	1926.14					28.9866	0.28046	1725.45	1724.47					28.9866	0.264831	1770.65	1769.5					28.9866	0.510195	1798.26	1796.29
29.0379	-0.24086	1983.1	1985.21					29.0379	0.399554	1927.45	1926.19					29.0379	0.371669	1726.1	1724.52					29.0379	0.128981	1770.42	1769.86					29.0379	0.294944	1798.79	1797.65
29.0891	-0.48881	1981.6	1984.07					29.0891	0.439855	1928.05	1926.67					29.0891	0.233205	1725.82	1724.86					29.0891	0.024531	1769.77	1769.66					29.0891	-0.2283	1798.35	1799.23
29.1404	-0.84601	1980.61	1983.56					29.1404	0.443572	1928.35	1926.95					29.1404	-0.135475	1724.71	1725.04					29.1404	-0.0868238	1768.7	1769.08					29.1404	-0.73875	1798.49	1801.36
29.1916	-0.9046	1980.53	1984.02					29.1916	0.565147	1928.84	1927.06					29.1916	-0.498237	1723.68	1725.16					29.1916	-0.254765	1768.92	1770.03					29.1916	-0.92482	1800.38	1803.97
29.2429	-0.89803	1980.39	1984.17					29.2429	0.784477	1929.3	1926.83					29.2429	-0.780241	1723.32	1725.33					29.2429	-0.324212	1769.68	1771.09					29.2429	-0.77727	1802.15	1805.17
29.2942	-0.91495	1980.27	1984					29.2942	0.860832	1929.38	1926.67					29.2942	-0.73244	1723.98	1725.91					29.2942	-0.361092	1769.88	1771.45					29.2942	-0.76779	1802.25	1805.24
29.3454	-0.98	1980.46	1983.95					29.3454	0.623237	1928.65	1926.69					29.3454	-0.176281	1724.99	1726.41					29.3454	-0.27233	1770.57	1771.75					29.3454	-0.68062	1801.87	1804.52
29.3967	-0.95298	1981.04	1984.4					29.3967	0.258278	1927.65	1926.84					29.3967	0.465405	1725.67	1725.58					29.3967	-0.152825	1770.97	1771.64					29.3967	-0.44682	1801.87	1803.6
29.4479	-0.81581	1981.58	1984.88					29.4479	0.042226	1927.31	1927.18					29.4479	0.47337	1725.98	1724.12					29.4479	-0.295662	1770.52	1771.81					29.4479	-0.52191	1802.12	1804.15
29.4992	-0.744	1981.8	1984.87					29.4992	0.061434	1926.98	1926.79					29.4992	-0.0595658	1725.69	1724.4					29.4992	-0.372549	1770.79	1772.41					29.4992	-0.49071	1802.64	1804.55
29.5505	-0.66315	1982.29	1984.79					29.5505	0.185177	1926.62	1926.04					29.5505	-0.255281	1725.33	1725.89					29.5505	-0.402593	1771.15	1772.91					29.5505	-0.23939	1803.17	1804.1
29.6017	-0.47918	1983.54	1984.96					29.6017	-0.06217	1925.92	1926.12					29.6017	-0.173224	1725.51	1726.18					29.6017	-0.450045	1771.08	1773.04					29.6017	-0.04048	1802.96	1803.12
29.653	-0.27307	1984.81	1985.47					29.653	-0.5791	1924.86	1926.68					29.653	-0.17413	1726.02	1726.08					29.653	-0.343115	1771.46	1772.96					29.653	0.132228	1802.05	1801.54
29.7043	-0.08988	1984.87	1985.91					29.7043	-0.67251	1924.93	1927.05					29.7043	-0.144343	1726.24	1726.6					29.7043	-0.295822	1771.72	1773.01					29.7043	0.201819	1801.29	1800.51
29.7555	-0.08832	1983.96	1985.23					29.7555	-0.6213	1925.51	1927.47					29.7555	-0.177538	1725.87	1726.72					29.7555	-0.169902	1771.96	1772.7					29.7555	0.404262	1800.74	1799.17
29.8068	-0.30264	1982.9	1984.32					29.8068	-0.78022	1925.44	1927.9					29.8068	-0.184109	1725.71	1726.46					29.8068	-0.0526371	1772.28	1772.51					29.8068	0.529793	1800.13	1798.08
29.858	-0.46384	1982.21	1984.12					29.858	-0.72171	1925.55	1927.82					29.858	-0.0615168	1726	1726.32					29.858	-0.109006	1772.19	1772.66					29.858	0.346606	1800.05	1798.71
29.9093	-0.55263	1982.16	1984.08					29.9093	-0.6012	1926.03	1927.93					29.9093	0.241458	1727.04	1726.2					29.9093	-0.0930281	1772.28	1772.69					29.9093	0.393907	1800.54	1799.02
29.9606	-0.57309	1982.45	1984.39					29.9606	-0.81585	1925.9	1928.47					29.9606	0.611513	1728.42	1726.24					29.9606	-0.0600967	1772.83	1773.09					29.9606	0.612413	1800.89	1798.52
30.0118	-0.69148	1982.34	1984.76					30.0118	-0.87912	1925.82	1928.59					30.0118	0.647906	1728.36	1726.39					30.0118	0.0690121	1773.6	1773.3					30.0118	0.817435	1800.84	1797.68
30.0631	-0.77408	1982.43	1985.13					30.0631	-0.77816	1925.97	1928.43					30.0631	0.349496	1726.74	1726.21					30.0631	0.336245	1773.99	1772.53					30.0631	0.780356	1800.56	1797.54
30.1144	-0.47575	1983.61	1985.55					30.1144	-0.87042	1925.61	1928.35					30.1144	-0.0169083	1725.12	1725.58					30.1144	0.373596	1772.87	1771.24					30.1144	0.721105	1802.13	1799.34
30.1656	-0.33008	1984.38	1985.53					30.1656	-0.83662	1925.76	1928.4					30.1656	-0.0716478	1725.1	1725.18					30.1656	0.244483	1771.13	1770.07					30.1656	1.62273	1807.15	1800.85
30.2169	-0.45885	1984.42	1985.71					30.2169	-0.59774	1926.15	1928.03					30.2169	0.0288795	1725.56	1725.34					30.2169	0.151458	1769.89	1769.23					30.2169	3.20752	1813.7	1801.25
30.2681	-0.31768	1985.26	1986.27					30.2681	-0.56749	1925.69	1927.48					30.2681	0.114067	1725.31	1725.46					30.2681	-0.0327201	1769.2	1769.34					30.2681	4.55046	1818.81	1801.15
30.3194	-0.1083	1986.03	1986.54					30.3194	-0.85828	1925.08	1927.79					30.3194	0.168372	1724.91	1724.93					30.3194	-0.230593	1769.67	1770.67					30.3194	5.18368	1821.33	1801.21
30.3707	-0.11755	1985.02	1986.46					30.3707	-0.94743	1925.17	1928.15					30.3707	-0.148285	1724.31	1724.35					30.3707	-0.114005	1770.64	1771.13					30.3707	5.09884	1821.72	1801.92
30.4219	-0.27618	1983.4	1985.49					30.4219	-0.67336	1925.19	1927.31					30.4219	-0.393798	1724.45	1724.81					30.4219	0.153253	1771	1770.33					30.4219	5.14999	1820.8	1800.82
30.4732	-0.50028	1982.24	1984.51					30.4732	-0.5321	1924.72	1926.39					30.4732	-0.28982	1724.7	1725.76					30.4732	0.116412	1770.89	1770.38					30.4732	5.41707	1817.43	1796.46
30.5244	-0.47603	1981.17	1984.26					30.5244	-0.52614	1924.72	1926.38					30.5244	-0.0676344	1724.45	1725.67					30.5244	-0.0172468	1771.12	1771.19					30.5244	5.05877	1812.39	1792.84
30.5757	-0.45401	1981.06	1983.09					30.5757	-0.41847	1924.63	1925.94					30.5757	-0.167994	1724.37	1724.67					30.5757	-0.148049	1771.08	1771.72					30.5757	4.52799	1810.41	1792.92
30.627	-0.60111	1981.84	1982.88					30.627	-0.52368	1924.23	1925.88					30.627	-0.537173	1724.2	1724.93					30.627	-0.300354	1770.23	1771.54					30.627	4.39736	1810.81	1793.81
30.6782	-0.6246	1982.12	1984.26					30.6782	-0.69667	1924.26	1926.46					30.6782	-0.46679	1724.35	1725.99					30.6782	-0.319435	1769.92	1771.31					30.6782	4.14729	1809.96	1793.93
30.7295	-0.62598	1981.88	1984.64					30.7295	-0.78109	1924.27	1926.73					30.7295	-0.184962	1725.15	1725.9					30.7295	-0.404965	1770.03	1771.79					30.7295	3.65317	1808.36	1794.24
30.7808	-0.69639	1981.91	1984.4					30.7808	-1.11748	1923.92	1927.44					30.7808	0.160205	1726.32	1725.77					30.7808	-0.534026	1769.78	1772.1					30.7808	3.48286	1807.68	1794.21
30.832	-0.77314	1982.45	1984.71					30.832	-1.23257	1924.03	1927.92					30.832	0.45187	1727.18	1725.79					30.832	-0.599468	1769.08	1771.68					30.832	3.49748	1807.91	1794.39
30.8833	-0.62931	1983.4	1985.57					30.8833	-0.95614	1924.76	1927.77					30.8833	0.313686	1727.27	1725.68					30.8833	-0.713217	1768.13	1771.23					30.8833	3.24333	1807.89	1795.35
30.9345	-0.305	1983.87	1985.94					30.9345	-0.91457	1925.07	1927.95					30.9345	0.2005	1726.81	1726.23					30.9345	-0.769268	1767.25	1770.59					30.9345	3.18733	1807.53	1795.2
30.9858	-0.24666	1983.16	1985.1					30.9858	-1.11958	1924.99	1928.52					30.9858	0.29119	1726.3	1726.14					30.9858	-0.811504	1766.65	1770.18					30.9858	3.11878	1807.63	1795.57
31.0371	-0.52294	1981.97	1984.16					31.0371	-1.13346	1925.31	1928.88					31.0371	0.00649689	1725.31	1725.33					31.0371	-0.724951	1767.08	1770.23					31.0371	2.61019	1808.31	1798.2
31.0883	-0.79255	1980.59	1984.07					31.0883	-0.97378	1926.21	1929.28					31.0883	-0.445813	1724.44	1725.29					31.0883	-0.620498	1767.71	1770.4					31.0883	2.38237	1808.64	1799.4
31.1396	-0.81686	1979.93	1983.78					31.1396	-0.91679	1926.9	1929.8					31.1396	-0.278206	1725.12	1725.93					31.1396	-0.665636	1768.18	1771.08					31.1396	2.63912	1807.34	1797.12
31.1909	-0.85385	1980.17	1983.21					31.1909	-0.8292	1926.92	1929.54					31.1909	-0.0645434	1725.79	1726.05					31.1909	-0.509895	1768.88	1771.1					31.1909	2.71597	1804.35	1793.85
31.2421	-1.06257	1980.08	1983.6					31.2421	-0.7255	1926.68	1928.97					31.2421	-0.0550298	1725.34	1726.01					31.2421	-0.276851	1769.14	1770.35					31.2421	2.37454	1802.08	1792.91
31.2934	-1.08382	1979.98	1984.35					31.2934	-0.76981	1926.56	1928.99					31.2934	0.334905	1725.19	1725.53					31.2934	-0.0030216	1770	1770.02					31.2934	2.26126	1802.85	1794.11
31.3446	-0.74723	1980.16	1984.34					31.3446	-0.71516	1926.98	1929.24					31.3446	0.414754	1725.24	1724.08					31.3446	0.0872651	1770.89	1770.52					31.3446	2.17451	1804.28	1795.86
31.3959	-0.5108	1980.45	1983.17					31.3959	-0.58729	1927.33	1929.18					31.3959	0.0912132	1725.18	1723.87					31.3959	-0.174825	1770.74	1771.51					31.3959	1.65815	1804.81	1798.39
31.4472	-0.62604	1981.37	1982.51					31.4472	-0.4736	1927.44	1928.93					31.4472	0.0324441	1725.14	1724.88					31.4472	-0.347181	1770.19	1771.7					31.4472	1.36753	1805.91	1800.61
31.4984	-0.73894	1982.61	1983.89					31.4984	-0.21896	1928.43	1929.12					31.4984	0.0591541	1724.31	1725.04					31.4984	-0.420803	1769.05	1770.88					31.4984	1.31258	1806.89	1801.8
31.5497	-0.87443	1983.32	1985.59					31.5497	0.041726	1929.81	1929.68					31.5497	0.0622638	1723.92	1724.11					31.5497	-0.700823	1767.5	1770.55					31.5497	1.18954	1807.34	1802.72
31.6009	-1.06615	1983.55	1986.84					31.6009	0.088401	1930.11	1929.83					31.6009	0.265949	1724.34	1723.71					31.6009	-0.859979	1766.76	1770.5					31.6009	1.15928	1807.38	1802.88
31.6522	-0.88222	1983.54	1987.85					31.6522	0.000544	1929.29	1929.29					31.6522	0.299859	1723.7	1723.46					31.6522	-0.685812	1767.29	1770.27					31.6522	1.68786	1809.16	1802.6
31.7035	-0.55593	1982.74	1987.1					31.7035	0.367413	1929	1927.84					31.7035	0.236879	1722.56	1722.71					31.7035	-0.549311	1768.29	1770.68					31.7035	3.29211	1814.89	1802.11
31.7547	-0.60399	1981.51	1984.98					31.7547	0.880952	1929.17	1926.4					31.7547	0.357508	1721.81	1721.77					31.7547	-0.337996	1769.31	1770.78					31.7547	4.90414	1820.73	1801.69
31.806	-0.69149	1981.45	1983.94					31.806	0.552778	1928.36	1926.62					31.806	0.226396	1721.17	1720.63					31.806	-0.133731	1769.99	1770.57					31.806	5.44597	1823.19	1802.04
31.8573	-0.82825	1981.55	1984.23					31.8573	0.035972	1927.78	1927.67					31.8573	0.105078	1720.63	1720.42					31.8573	-0.235429	1769.92	1770.94					31.8573	5.49068	1823.24	1801.92
31.9085	-0.854	1981.83	1984.89					31.9085	0.189108	1928.78	1928.18					31.9085	0.00344547	1720.46	1720.28					31.9085	-0.584861	1768.97	1771.51					31.9085	5.39472	1822.58	1801.63
31.9598	-0.36845	1983.54	1985.27					31.9598	0.425629	1929.97	1928.63					31.9598	-0.290155	1721.18	1720.45					31.9598	-0.736822	1768.39	1771.6					31.9598	5.18402	1821.7	1801.58
32.011	-0.04655	1984.31	1985.02					32.011	0.242309	1930.06	1929.3					32.011	-0.400342	1722.92	1722.14					32.011	-0.623663	1768.84	1771.56					32.011	4.84137	1820.59	1801.79
32.0623	-0.109	1983.74	1984.49					32.0623	-0.09675	1929.42	1929.72					32.0623	-0.316565	1724.88	1724.25					32.0623	-0.563792	1769.28	1771.73					32.0623	4.45655	1819.78	1802.47
32.1136	-0.21696	1983.53	1984.18					32.1136	-0.183	1928.99	1929.57					32.1136	-0.153733	1725.98	1725.94					32.1136	-0.489816	1769.33	1771.46					32.1136	4.35772	1819.28	1802.35
32.1648	-0.31586	1983.32	1984.4					32.1648	-0.22156	1928.75	1929.44					32.1648	0.0146562	1726.4	1726.49					32.1648	-0.383676	1769.45	1771.12					32.1648	4.29358	1818.16	1801.49
32.2161	-0.38279	1983.08	1984.59					32.2161	-0.58123	1928.16	1930					32.2161	0.0442789	1726.59	1726.35					32.2161	-0.130572	1770.81	1771.38					32.2161	4.26141	1818.24	1801.7
32.2674	-0.57805	1982.64	1984.62					32.2674	-0.88377	1927.64	1930.43					32.2674	0.0325894	1726.19	1726.44					32.2674	0.0933622	1772.17	1771.76					32.2674	4.68605	1820.87	1802.66
32.3186	-0.68741	1982.49	1984.97					32.3186	-0.937	1927.32	1930.28					32.3186	-0.0210863	1725.4	1726.08					32.3186	-0.0059666	1772.15	1772.18					32.3186	5.41314	1822.84	1801.82
32.3699	-0.525	1983.3	1985.26					32.3699	-0.70632	1927.38	1929.61					32.3699	-0.149046	1724.95	1725.47					32.3699	-0.233398	1771.88	1772.89					32.3699	5.8534	1822.57	1799.87
32.4211	-0.50151	1983.57	1985.41					32.4211	-0.43604	1927.2	1928.57					32.4211	-0.0736544	1724.87	1725.45					32.4211	-0.433056	1771.19	1773.07					32.4211	5.70019	1820.5	1798.41
32.4724	-0.60286	1983.1	1985.59					32.4724	-0.47449	1926.29	1927.78					32.4724	0.0200897	1725.13	1725.11					32.4724	-0.56947	1769.98	1772.46					32.4724	5.59514	1818.03	1796.37
32.5237	-0.48828	1982.75	1985.53					32.5237	-0.41369	1925.91	1927.21					32.5237	-0.137038	1725.14	1725.07					32.5237	-0.626459	1769.58	1772.31					32.5237	5.46221	1815.47	1794.36
32.5749	-0.30771	1982.85	1984.71					32.5749	-0.39929	1925.77	1927.03					32.5749	-0.255697	1725.03	1725.59					32.5749	-0.742181	1769.34	1772.56					32.5749	4.78493	1812.49	1794
32.6262	-0.2529	1983.11	1984.09					32.6262	-0.5716	1925.29	1927.09					32.6262	-0.0792641	1725.93	1725.88					32.6262	-0.921316	1768.51	1772.52					32.6262	4.21024	1810.6	1794.32
32.6774	-0.31059	1982.39	1984.13					32.6774	-0.5247	1925.19	1926.84					32.6774	0.0944629	1726.64	1726.2					32.6774	-0.939127	1768.52	1772.6					32.6774	3.73813	1809.7	1795.24
32.7287	-0.55813	1981.34	1983.64					32.7287	-0.50168	1924.96	1926.54					32.7287	-0.0901559	1726.17	1726.33					32.7287	-0.888658	1768.78	1772.65					32.7287	3.2253	1809.72	1797.23
32.78	-0.69065	1981.39	1983.59					32.78	-0.62088	1924.35	1926.3					32.78	-0.278385	1725.85	1726.47					32.78	-0.860663	1768.63	1772.38					32.78	2.8808	1810.33	1799.16
32.8312	-0.54576	1981.82	1984.17					32.8312	-0.39966	1924.44	1925.69					32.8312	-0.189676	1726.12	1726.78					32.8312	-0.644686	1769.4	1772.2					32.8312	2.54087	1810.17	1800.31
32.8825	-0.38926	1981.93	1984.02					32.8825	-0.20474	1924.6	1925.25					32.8825	-0.0271465	1726.17	1726.75					32.8825	-0.317145	1771.11	1772.49					32.8825	2.16501	1808.93	1800.53
32.9338	-0.45309	1981.82	1983.5					32.9338	-0.36545	1923.97	1925.12					32.9338	-0.0632936	1725.69	1726.26					32.9338	0.0385281	1772.66	1772.5					32.9338	1.76602	1807.64	1800.79
32.985	-0.55121	1981.58	1983.65					32.985	-0.43733	1923.16	1924.53					32.985	-0.255318	1724.95	1725.9					32.985	0.385096	1773.57	1771.89					32.985	1.59586	1806.93	1800.74
33.0363	-0.59107	1980.9	1983.8					33.0363	-0.70107	1922.49	1924.7					33.0363	-0.492802	1724.36	1725.8					33.0363	0.542595	1773.84	1771.48					33.0363	1.66866	1806.77	1800.29
33.0875	-0.87384	1979.62	1983.28					33.0875	-0.77548	1922.62	1925.06					33.0875	-0.616725	1724.03	1726					33.0875	0.485406	1773.71	1771.6					33.0875	1.5831	1807.35	1801.21
33.1388	-0.82853	1979.71	1983.13					33.1388	-0.55484	1923.04	1924.79					33.1388	-0.62511	1723.99	1726.08					33.1388	0.274958	1772.97	1771.77					33.1388	1.34079	1807.36	1802.16
33.1901	-0.4447	1980.7	1983.05					33.1901	-0.56032	1923.19	1924.96					33.1901	-0.513227	1724.57	1726.07					33.1901	0.0223023	1771.88	1771.79					33.1901	1.13069	1806.53	1802.14
33.2413	-0.50925	1980.01	1982.49					33.2413	-0.20462	1924.44	1925.09					33.2413	-0.145583	1725.31	1726.28					33.2413	-0.145626	1771.57	1772.2					33.2413	0.970222	1805.94	1802.18
33.2926	-0.58302	1979.39	1982.06					33.2926	0.267405	1925.98	1925.14					33.2926	0.0611049	1725.92	1725.8					33.2926	-0.286854	1771.27	1772.51					33.2926	0.783572	1805.65	1802.61
33.3438	-0.27773	1980.24	1981.74					33.3438	0.078826	1926	1925.76					33.3438	0.0611964	1726.07	1725.71					33.3438	-0.500558	1770.39	1772.57					33.3438	0.548931	1805.65	1803.52
33.3951	-0.20213	1980.73	1981.36					33.3951	-0.30685	1925.41	1926.38					33.3951	0.0442284	1725.61	1725.86					33.3951	-0.64961	1769.91	1772.74					33.3951	0.610449	1806.35	1803.97
33.4464	-0.23224	1980.88	1981.54					33.4464	-0.26296	1925.47	1926.3					33.4464	-0.107439	1725.74	1725.46					33.4464	-0.500875	1770.2	1772.38					33.4464	0.985339	1807.36	1803.54
33.4976	-0.05789	1981.1	1981.82					33.4976	-0.21427	1925.39	1926.07					33.4976	-0.300376	1726.37	1726.1					33.4976	-0.400621	1770.28	1772.02					33.4976	1.17468	1807.33	1802.76
33.5489	-0.04804	1980.89	1981.33					33.5489	-0.36476	1924.97	1926.12					33.5489	-0.29515	1726.73	1727.37					33.5489	-0.609256	1769.83	1772.48					33.5489	0.909224	1806.3	1802.77
33.6002	-0.168	1980.76	1981.08					33.6002	-0.28022	1925.16	1926.04					33.6002	-0.218168	1726.43	1727.71					33.6002	-0.494541	1770.66	1772.81					33.6002	0.466953	1805.54	1803.72
33.6514	-0.27115	1980.66	1981.44					33.6514	-0.09032	1925.72	1926.01					33.6514	-0.132058	1725.84	1727.15					33.6514	-0.125915	1771.75	1772.3					33.6514	0.515775	1805.3	1803.3
33.7027	-0.21217	1980.67	1981.75					33.7027	-0.31858	1925.58	1926.58					33.7027	0.041429	1725.41	1726.28					33.7027	-0.151238	1771.56	1772.22					33.7027	0.499357	1805.08	1803.14
33.7539	-0.07441	1981.13	1981.53					33.7539	-0.53898	1925.49	1927.19					33.7539	0.179504	1725.05	1725.28					33.7539	-0.402769	1771.62	1773.37					33.7539	0.104724	1804.73	1804.33
33.8052	-0.08103	1981.53	1981.43					33.8052	-0.27669	1926.43	1927.3					33.8052	0.066507	1724.65	1724.46					33.8052	-0.65278	1771.5	1774.35					33.8052	0.228035	1804.45	1803.57
33.8565	-0.2075	1981.4	1981.86					33.8565	-0.36127	1926.61	1927.75					33.8565	-0.170834	1724.42	1724.43					33.8565	-0.783152	1770.91	1774.32					33.8565	0.532184	1804.06	1801.99
33.9077	-0.4111	1980.73	1982.23					33.9077	-0.71312	1926.34	1928.59					33.9077	-0.132203	1725.17	1724.99					33.9077	-0.633818	1771.16	1773.92					33.9077	0.28099	1803.65	1802.56
33.959	-0.26166	1980.72	1982.38					33.959	-0.54204	1927.3	1929.01					33.959	0.0107143	1725.82	1725.61					33.959	-0.375505	1771.87	1773.5					33.959	-0.15885	1803.4	1804.02
34.0103	0.119611	1981.68	1981.77					34.0103	-0.16342	1927.99	1928.5					34.0103	-0.02416	1725.42	1725.78					34.0103	-0.226304	1771.94	1772.93					34.0103	-0.16009	1803.12	1803.75
34.0615	0.171147	1982.14	1981.2					34.0615	-0.07716	1927.34	1927.59					34.0615	0.0143328	1725.6	1725.5					34.0615	-0.256749	1771.69	1772.81					34.0615	0.077694	1802.81	1802.51
34.1128	0.11016	1981.89	1981.45					34.1128	-0.36351	1926.68	1927.83					34.1128	0.447196	1727.26	1725.55					34.1128	-0.402201	1771.43	1773.18					34.1128	0.287014	1802.78	1801.66
34.164	-0.02697	1981.17	1981.45					34.164	-0.71617	1926.38	1928.63					34.164	0.852622	1728.61	1725.78					34.164	-0.596748	1770.38	1772.97					34.164	0.410308	1802.72	1801.13
34.2153	-0.33554	1980.24	1981.28					34.2153	-0.81489	1926.26	1928.83					34.2153	0.506715	1727.54	1725.77					34.2153	-0.692217	1769.53	1772.54					34.2153	0.474392	1802.67	1800.83
34.2666	-0.52066	1979.87	1981.59					34.2666	-0.70032	1926.49	1928.7					34.2666	-0.0756018	1725.8	1725.86					34.2666	-0.586632	1770.43	1772.99					34.2666	0.923925	1803.31	1799.73
34.3178	-0.54839	1979.88	1981.96					34.3178	-0.54175	1926.68	1928.39					34.3178	-0.0990874	1725.64	1726.06					34.3178	-0.419875	1771.53	1773.36					34.3178	1.35483	1803.43	1798.19
34.3691	-0.58453	1979.89	1982.09					34.3691	-0.67181	1926.56	1928.68					34.3691	-0.0864514	1725.9	1725.97					34.3691	-0.416005	1771.28	1773.09					34.3691	0.837748	1802.54	1799.3
34.4203	-0.68166	1979.67	1982.24					34.4203	-0.7947	1926.58	1929.08					34.4203	-0.119272	1726.07	1726.19					34.4203	-0.432617	1771.02	1772.9					34.4203	0.042548	1802.33	1802.17
34.4716	-0.81813	1979.37	1982.41					34.4716	-0.57746	1927.25	1929.07					34.4716	0.0514181	1725.87	1726.47					34.4716	-0.252787	1771.01	1772.11					34.4716	-0.17513	1802.38	1803.07
34.5229	-0.77671	1980.25	1982.66					34.5229	-0.60927	1927.16	1929.08					34.5229	0.0435991	1725.73	1725.7					34.5229	-0.165059	1770.48	1771.2					34.5229	-0.16275	1801.47	1802.1
34.5741	-0.47055	1981.67	1983.38					34.5741	-0.81928	1926.33	1928.91					34.5741	-0.0548254	1726.32	1725.58					34.5741	-0.183645	1770.38	1771.18					34.5741	-0.2022	1800.71	1801.49
34.6254	-0.3056	1981.92	1983.56					34.6254	-0.78697	1926.36	1928.85					34.6254	0.00460177	1726.41	1726.5					34.6254	-0.082118	1770.77	1771.13					34.6254	-0.11988	1801.08	1801.55
34.6767	-0.33366	1981.17	1983.15					34.6767	-0.75968	1926.46	1928.86					34.6767	-0.013099	1725.85	1726.4					34.6767	-0.0566896	1770.75	1771					34.6767	0.084992	1801.51	1801.18
34.7279	-0.26654	1980.55	1982.52					34.7279	-0.76326	1926.31	1928.71					34.7279	-0.224588	1725.26	1725.9					34.7279	-0.247546	1770.24	1771.32					34.7279	0.168241	1801.69	1801.04
34.7792	-0.02922	1981.51	1981.62					34.7792	-0.52643	1926.76	1928.42					34.7792	-0.219817	1725.34	1726.01					34.7792	-0.422111	1770	1771.84					34.7792	0.291986	1802.23	1801.1
34.8304	0.118401	1982.87	1981.63					34.8304	-0.29432	1927.24	1928.17					34.8304	-0.0764134	1725.86	1726.07					34.8304	-0.467762	1770.05	1772.09					34.8304	0.264178	1802.59	1801.57
34.8817	-0.27983	1982.43	1982.39					34.8817	-0.36284	1927.34	1928.49					34.8817	-0.015765	1725.89	1726.11					34.8817	-0.634618	1769.23	1772					34.8817	0.309985	1803.35	1802.15
34.933	-0.62751	1981.73	1983.56					34.933	-0.31945	1927.93	1928.93					34.933	0.267078	1726.32	1725.94					34.933	-0.793405	1768.19	1771.64					34.933	0.671668	1804.06	1801.45
34.9842	-0.42333	1982.34	1984.26					34.9842	0.100079	1928.84	1928.53					34.9842	0.560397	1727.18	1725.44					34.9842	-0.707016	1767.64	1770.71					34.9842	0.588969	1803.48	1801.19
35.0355	-0.19378	1983.08	1984.05					35.0355	0.382182	1928.99	1927.78					35.0355	0.377725	1727.05	1725.32					35.0355	-0.659407	1767.1	1769.97					35.0355	0.341026	1802.99	1801.66
35.0868	-0.09689	1983.49	1983.86					35.0868	0.114497	1928.36	1928					35.0868	0.185932	1726.61	1725.79					35.0868	-0.745284	1767.44	1770.68					35.0868	0.279357	1802.87	1801.79
35.138	-0.0938	1983.74	1983.88					35.138	-0.26272	1927.83	1928.65					35.138	0.279656	1726.72	1725.99					35.138	-0.718978	1769.01	1772.14					35.138	0.408937	1802.95	1801.37
35.1893	-0.08372	1983.62	1984.11					35.1893	-0.21735	1927.86	1928.55					35.1893	0.285272	1726.58	1725.79					35.1893	-0.545032	1770.17	1772.54					35.1893	0.706115	1803.8	1801.06
35.2405	0.006718	1983.58	1983.95					35.2405	0.021725	1928	1927.93					35.2405	0.170361	1726.1	1725.63					35.2405	-0.405758	1770.5	1772.27					35.2405	0.850909	1805.11	1801.81
35.2918	0.008173	1983.53	1983.55					35.2918	0.105072	1927.96	1927.62					35.2918	0.0727918	1725.75	1725.54					35.2918	-0.369653	1770.9	1772.51					35.2918	1.24462	1806.65	1801.82
35.3431	-0.13439	1983.23	1983.49					35.3431	-0.06451	1927.5	1927.7					35.3431	0.0968383	1725.61	1725.51					35.3431	-0.436904	1770.64	1772.54					35.3431	1.66933	1807.12	1800.65
35.3943	-0.09406	1983.89	1983.77					35.3943	-0.28991	1926.92	1927.83					35.3943	0.169842	1725.27	1725.29					35.3943	-0.259537	1770.33	1771.46					35.3943	1.64734	1806.67	1800.28
35.4456	0.096745	1984.83	1984.27					35.4456	-0.23886	1926.77	1927.52					35.4456	0.156595	1725.46	1724.71					35.4456	0.291147	1772.03	1770.77					35.4456	1.4477	1806.38	1800.76
35.4968	0.065719	1984.92	1984.44					35.4968	-0.16327	1926.8	1927.31					35.4968	-0.183032	1725.88	1724.94					35.4968	0.649855	1774.18	1771.35					35.4968	1.16378	1805.56	1801.04
35.5481	-0.04629	1985.2	1984.65					35.5481	-0.1735	1927.32	1927.87					35.5481	-0.516833	1725.17	1726.49					35.5481	0.553315	1773.92	1771.51					35.5481	0.863043	1804.72	1801.37
35.5994	-0.07242	1985.11	1985.39					35.5994	-0.14563	1927.82	1928.28					35.5994	-0.274729	1724.76	1726.89					35.5994	0.147032	1772.07	1771.43					35.5994	0.667354	1803.93	1801.34
35.6506	-0.07617	1983.8	1985.4					35.6506	-0.19472	1927.73	1928.35					35.6506	-0.0635009	1725.03	1725.67					35.6506	-0.119661	1770.79	1771.31					35.6506	0.517085	1802.8	1800.79
35.7019	-0.08086	1982.44	1984.11					35.7019	-0.20939	1927.54	1928.2					35.7019	-0.387491	1724.23	1725.24					35.7019	-0.0208433	1770.29	1770.38					35.7019	0.321294	1801.75	1800.51
35.7532	-0.27382	1981.56	1982.76					35.7532	-0.09548	1927.23	1927.53					35.7532	-0.523749	1723.4	1725.52					35.7532	-0.0031961	1770.05	1770.06					35.7532	0.019655	1801.2	1801.12
35.8044	-0.58377	1981.01	1982.66					35.8044	-0.03499	1926.62	1926.73					35.8044	-0.304086	1723.63	1725.14					35.8044	-0.160325	1769.91	1770.61					35.8044	-0.07946	1801.4	1801.71
35.8557	-0.76315	1980.91	1983.36					35.8557	-0.21597	1925.84	1926.52					35.8557	-0.473029	1723.32	1724.64					35.8557	-0.26648	1769.74	1770.9					35.8557	0.33828	1802.58	1801.27
35.9069	-0.89825	1980.88	1983.98					35.9069	-0.35613	1925.53	1926.65					35.9069	-0.585849	1723.13	1724.89					35.9069	-0.346444	1769.57	1771.08					35.9069	1.0089	1804.59	1800.67
35.9582	-0.87424	1981.03	1984.5					35.9582	-0.35912	1925.34	1926.47					35.9582	-0.367046	1723.67	1725.07					35.9582	-0.409931	1769.63	1771.42					35.9582	1.37422	1805.49	1800.16
36.0095	-0.73268	1981.09	1984.55					36.0095	-0.39623	1924.85	1926.1					36.0095	-0.584021	1723.59	1724.89					36.0095	-0.284781	1769.89	1771.12					36.0095	1.12547	1804.82	1800.45
36.0607	-0.70983	1980.5	1984.04					36.0607	-0.25536	1924.68	1925.49					36.0607	-0.813843	1723.48	1725.53					36.0607	-0.0677957	1770.18	1770.47					36.0607	0.97847	1804.37	1800.57
36.112	-0.74848	1980.26	1983.36					36.112	-0.18082	1924.53	1925.1					36.112	-0.564384	1723.77	1726.19					36.112	0.0212382	1770.99	1770.9					36.112	1.02825	1804.23	1800.24
36.1632	-0.60534	1981	1983.27					36.1632	-0.31096	1923.89	1924.87					36.1632	0.0252158	1725.21	1725.64					36.1632	0.140225	1771.75	1771.14					36.1632	0.711347	1803.65	1800.89
36.2145	-0.38569	1981.55	1983.44					36.2145	-0.30811	1923.99	1924.96					36.2145	0.861347	1728.45	1725.13					36.2145	0.0830405	1771.59	1771.23					36.2145	0.613875	1802.71	1800.33
36.2658	-0.45429	1981.11	1983.1					36.2658	-0.32698	1924.54	1925.57					36.2658	1.70199	1731.53	1725.59					36.2658	-0.329283	1770.86	1772.29					36.2658	0.862662	1801.84	1798.5
36.317	-0.67233	1980.46	1982.93					36.317	-0.55655	1924.07	1925.82					36.317	2.4154	1733.4	1725.87					36.317	-0.565003	1770.03	1772.49					36.317	0.812817	1801.24	1798.09
36.3683	-0.66071	1980.3	1983.17					36.3683	-0.79216	1923.2	1925.69					36.3683	2.66276	1733.74	1725.37					36.3683	-0.398417	1769.95	1771.68					36.3683	0.592611	1801.04	1798.75
36.4196	-0.43438	1980.84	1982.96					36.4196	-0.6769	1922.91	1925.04					36.4196	2.31097	1732.45	1724.9					36.4196	-0.3359	1769.82	1771.29					36.4196	0.715559	1801.77	1798.99
36.4708	-0.28145	1982.18	1982.59					36.4708	-0.59767	1923.06	1924.94					36.4708	1.70311	1730.9	1724.77					36.4708	-0.494078	1768.87	1771.02					36.4708	0.819476	1802.9	1799.72
36.5221	-0.19111	1983.26	1983.32					36.5221	-0.6907	1923.23	1925.41					36.5221	1.19014	1729.59	1725.24					36.5221	-0.455733	1768.37	1770.35					36.5221	0.623442	1803.41	1800.99
36.5733	-0.19851	1982.89	1984.02					36.5733	-0.7368	1923.29	1925.61					36.5733	0.869609	1728.19	1725.64					36.5733	-0.402431	1768.96	1770.71					36.5733	0.647374	1803.72	1801.21
36.6246	-0.2854	1981.98	1983.68					36.6246	-0.76375	1923.68	1926.08					36.6246	0.569411	1726.9	1725.3					36.6246	-0.449839	1770.19	1772.15					36.6246	0.657243	1803.84	1801.28
36.6759	-0.32589	1981.61	1983.13					36.6759	-0.57205	1924.82	1926.62					36.6759	0.272487	1725.76	1725.01					36.6759	-0.294378	1771.28	1772.56					36.6759	0.4	1803.57	1802.02
36.7271	-0.27237	1981.77	1982.92					36.7271	-0.49271	1925.61	1927.17					36.7271	0.235522	1725.35	1724.85					36.7271	0.029066	1772.87	1772.74					36.7271	0.486503	1803.21	1801.32
36.7784	-0.24414	1981.93	1982.86					36.7784	-0.60157	1925.67	1927.57					36.7784	0.394321	1725.54	1724.57					36.7784	0.611329	1775.93	1773.27					36.7784	0.725217	1802.65	1799.84
36.8297	-0.40425	1981.52	1982.92					36.8297	-0.64122	1925.46	1927.48					36.8297	0.356406	1725.16	1724.23					36.8297	1.2657	1778.61	1773.1					36.8297	0.562194	1803.13	1800.95
36.8809	-0.44473	1981.12	1983.15					36.8809	-0.68083	1924.91	1927.06					36.8809	0.314492	1724.47	1723.97					36.8809	1.43917	1779.14	1772.88					36.8809	0.55128	1804.32	1802.18
36.9322	-0.51291	1980.6	1982.91					36.9322	-0.47107	1924.99	1926.47					36.9322	0.341492	1724.44	1723.42					36.9322	1.27245	1778.41	1772.87					36.9322	0.827257	1803.94	1800.74
36.9834	-0.6336	1979.15	1982.66					36.9834	-0.37651	1925.36	1926.54					36.9834	-0.0054424	1724.28	1723.31					36.9834	0.975447	1777.17	1772.93					36.9834	0.870411	1802.49	1799.11
37.0347	-0.46188	1978.7	1981.7					37.0347	-0.76364	1925.07	1927.48					37.0347	-0.331821	1723.95	1724.3					37.0347	0.770474	1776.06	1772.71					37.0347	0.789344	1801.79	1798.73
37.086	-0.41298	1979.33	1980.55					37.086	-0.921	1925.11	1928.01					37.086	-0.229731	1724.35	1725.06					37.086	0.705155	1775.31	1772.24					37.086	0.796539	1801.8	1798.71
37.1372	-0.53392	1979.15	1980.99					37.1372	-0.74405	1925.67	1928.01					37.1372	-0.123069	1724.51	1725.11					37.1372	0.292049	1774.23	1772.96					37.1372	0.837138	1801.86	1798.61
37.1885	-0.48059	1979.36	1981.3					37.1885	-0.73261	1926.03	1928.34					37.1885	-0.0819955	1724.31	1724.92					37.1885	-0.166286	1772.9	1773.62					37.1885	0.712044	1801.64	1798.88
37.2397	-0.51945	1980.03	1981.29					37.2397	-0.82543	1926.41	1929.01					37.2397	-0.00644	1724.25	1724.58					37.2397	-0.347027	1771.63	1773.14					37.2397	0.549906	1801.04	1798.91
37.291	-0.6823	1980.41	1982.12					37.291	-0.78751	1926.77	1929.25					37.291	-0.0839187	1724.11	1724.27					37.291	-0.509349	1771.08	1773.29					37.291	0.417584	1801.04	1799.43
37.3423	-0.62697	1981.11	1983.15					37.3423	-0.85635	1926.44	1929.14					37.3423	-0.164429	1724.16	1724.39					37.3423	-0.538967	1771.23	1773.57					37.3423	0.314614	1801.52	1800.3
37.3935	-0.503	1981.66	1983.63					37.3935	-0.82169	1926.56	1929.15					37.3935	-0.0339475	1724.6	1724.71					37.3935	-0.438163	1771.18	1773.09					37.3935	0.333719	1801.02	1799.72
37.4448	-0.6362	1981.16	1983.68					37.4448	-0.79955	1926.94	1929.46					37.4448	0.196862	1725.4	1724.71					37.4448	-0.379891	1770.9	1772.56					37.4448	0.320147	1800.25	1799.01
37.4961	-0.79665	1980.28	1983.72					37.4961	-1.10519	1926.74	1930.22					37.4961	0.199881	1726.05	1724.74					37.4961	-0.273746	1770.58	1771.77					37.4961	0.403427	1799.73	1798.17
37.5473	-0.54933	1980.29	1983.49					37.5473	-1.11842	1927	1930.53					37.5473	-0.0392075	1725.95	1725.39					37.5473	-0.187263	1770.23	1771.04					37.5473	0.655737	1799.11	1796.57
37.5986	-0.30946	1980.79	1982.5					37.5986	-0.66399	1927.69	1929.78					37.5986	-0.188994	1725.14	1726.08					37.5986	-0.226049	1769.96	1770.94					37.5986	0.80003	1798.87	1795.78
37.6498	-0.42188	1980.88	1982.03					37.6498	-0.28741	1928.58	1929.48					37.6498	-0.270548	1724.4	1725.77					37.6498	-0.217644	1770.21	1771.15					37.6498	0.756511	1799.2	1796.27
37.7011	-0.51381	1980.54	1982.58					37.7011	-0.19993	1929.84	1930.47					37.7011	-0.519223	1724.34	1725.3					37.7011	-0.292333	1770.13	1771.4					37.7011	0.699713	1799.91	1797.2
37.7524	-0.56645	1980.17	1982.6					37.7524	-0.105	1930.84	1931.17					37.7524	-0.806959	1724.39	1726.07					37.7524	-0.472598	1769.31	1771.37					37.7524	0.601669	1799.96	1797.63
37.8036	-0.37908	1980.97	1982.45					37.8036	-0.1093	1930.82	1931.16					37.8036	-0.453787	1724.82	1727.07					37.8036	-0.62845	1768.67	1771.41					37.8036	0.490797	1800.1	1798.2
37.8549	-0.09097	1982.41	1982.49					37.8549	-0.24235	1930.62	1931.39					37.8549	0.338583	1725.33	1726.33					37.8549	-0.736182	1768.47	1771.67					37.8549	0.513008	1801.1	1799.11
37.9062	-0.04783	1982.74	1982.78					37.9062	-0.22801	1930.35	1931.07					37.9062	0.551084	1724.96	1724.21					37.9062	-0.591606	1768.89	1771.46					37.9062	0.632554	1801.16	1798.71
37.9574	-0.18276	1982.11	1982.94					37.9574	-0.37723	1929.43	1930.62					37.9574	0.417341	1724.56	1723.13					37.9574	-0.382246	1769.79	1771.45					37.9574	0.573929	1800.29	1798.06
38.0087	-0.47275	1981.81	1982.84					38.0087	-0.69788	1929.17	1931.37					38.0087	0.634697	1724.49	1723.17					38.0087	-0.326152	1770.7	1772.12					38.0087	0.347626	1799.98	1798.63
38.0599	-0.64396	1982.75	1983.72					38.0599	-0.6403	1929.95	1931.98					38.0599	0.890007	1723.43	1722.38					38.0599	-0.289621	1771.38	1772.64					38.0599	0.337552	1800.23	1798.92
38.1112	-0.55659	1984	1985.34					38.1112	-0.30017	1930.78	1931.72					38.1112	0.524328	1721.94	1720.48					38.1112	-0.210549	1771.64	1772.56					38.1112	0.368947	1800.3	1798.87
38.1625	-0.37357	1984.05	1986.25					38.1625	-0.19091	1930.77	1931.37					38.1625	-0.0776831	1722.32	1720.21					38.1625	-0.259252	1770.91	1772.04					38.1625	0.223757	1800.33	1799.46
38.2137	-0.56346	1982.75	1985.55					38.2137	-0.24371	1929.97	1930.74					38.2137	-0.275425	1724.01	1722.59					38.2137	-0.492619	1769.23	1771.38					38.2137	0.224332	1801.05	1800.18
38.265	-0.89129	1981.55	1985.02					38.265	-0.11832	1929.62	1930					38.265	-0.128086	1725.59	1724.93					38.265	-0.571061	1768.71	1771.19					38.265	0.298523	1801.39	1800.23
38.3162	-0.86442	1981.29	1985.14					38.3162	0.03772	1929.88	1929.76					38.3162	0.272263	1726.78	1726.01					38.3162	-0.519803	1769.57	1771.83					38.3162	0.205262	1800.59	1799.79
38.3675	-0.86003	1981.23	1984.77					38.3675	-0.05226	1929.8	1929.97					38.3675	0.355829	1726.95	1725.87					38.3675	-0.814427	1769.61	1773.15					38.3675	0.144426	1800.01	1799.45
38.4188	-0.82372	1981.47	1984.69					38.4188	-0.02472	1929.97	1930.05					38.4188	0.0661147	1726.08	1725.77					38.4188	-1.0481	1769.32	1773.88					38.4188	0.287688	1800.44	1799.32
38.47	-0.65595	1981.58	1984.79					38.47	0.299059	1930.76	1929.82					38.47	0.180372	1725.34	1725.86					38.47	-0.678241	1770.07	1773.03					38.47	0.398604	1800.98	1799.43
38.5213	-0.82287	1980.98	1984.22					38.5213	0.275258	1930.89	1930.02					38.5213	0.499868	1725.44	1724.75					38.5213	-0.344071	1770.7	1772.19					38.5213	0.288139	1800.48	1799.37
38.5726	-1.10074	1980.64	1984.3					38.5726	-0.13898	1930.11	1930.54					38.5726	0.445757	1725.59	1723.78					38.5726	-0.453372	1769.93	1771.9					38.5726	0.091064	1799.41	1799.06
38.6238	-1.14744	1980.28	1985.07					38.6238	-0.26666	1929.71	1930.55					38.6238	0.259569	1725.87	1724.11					38.6238	-0.567035	1769.19	1771.65					38.6238	-0.05284	1798.62	1798.83
38.6751	-1.20188	1979.61	1984.9					38.6751	-0.33939	1929.59	1930.66					38.6751	0.267155	1726.97	1725					38.6751	-0.596359	1769.57	1772.17					38.6751	-0.27314	1798.08	1799.14
38.7263	-1.17137	1979.34	1984.45					38.7263	-0.54422	1929.13	1930.85					38.7263	0.287257	1727.51	1726.08					38.7263	-0.681697	1769.5	1772.46					38.7263	-0.42328	1797.92	1799.56
38.7776	-0.93988	1979.74	1984.05					38.7776	-0.50871	1928.8	1930.41					38.7776	0.242791	1727.42	1726.56					38.7776	-0.694701	1768.7	1771.72					38.7776	-0.32945	1798.3	1799.58
38.8289	-0.7767	1980.1	1983.52					38.8289	-0.47954	1928.57	1930.09					38.8289	0.458988	1727.66	1726.62					38.8289	-0.623737	1768.77	1771.48					38.8289	-0.36935	1799.38	1800.81
38.8801	-0.73779	1980	1983.23					38.8801	-0.3903	1928.87	1930.1					38.8801	0.528476	1727.06	1726.14					38.8801	-0.592509	1769.13	1771.7					38.8801	-0.34439	1800.75	1802.08
38.9314	-0.6492	1980.1	1982.96					38.9314	-0.36639	1928.95	1930.11					38.9314	0.257751	1726.32	1725.31					38.9314	-0.670019	1768.73	1771.64					38.9314	-0.12897	1801.62	1802.12
38.9826	-0.61562	1980.42	1982.71					38.9826	-0.58456	1928.21	1930.06					38.9826	0.219659	1726.83	1725.46					38.9826	-0.806262	1768.6	1772.11					38.9826	-0.10508	1801.63	1802.04
39.0339	-0.48185	1981.63	1982.9					39.0339	-0.58428	1928.18	1930.03					39.0339	0.165271	1727.09	1726.09					39.0339	-0.940334	1769.04	1773.13					39.0339	-0.27758	1800.2	1801.28
39.0852	-0.04404	1983.88	1983.57					39.0852	-0.47026	1928.63	1930.11					39.0852	0.0931904	1727.09	1726.54					39.0852	-1.05311	1769.17	1773.75					39.0852	-0.1379	1799	1799.54
39.1364	0.210474	1985.36	1984.06					39.1364	-0.40376	1928.5	1929.77					39.1364	0.318162	1727.72	1726.78					39.1364	-0.942242	1769.31	1773.42					39.1364	0.186639	1799.34	1798.62
39.1877	0.212554	1985.7	1984.52					39.1877	-0.451	1928.28	1929.7					39.1877	0.360443	1727.78	1726.66					39.1877	-0.724114	1769.42	1772.57					39.1877	0.216161	1799.48	1798.64
39.239	0.230283	1985.25	1984.84					39.239	-0.58018	1928.27	1930.1					39.239	0.275963	1727.55	1726.58					39.239	-0.705983	1769.05	1772.12					39.239	0.24456	1798.91	1797.97
39.2902	0.178078	1984.29	1984.32					39.2902	-0.47538	1928.27	1929.77					39.2902	0.31295	1727.65	1726.64					39.2902	-0.698753	1769.06	1772.1					39.2902	0.312201	1798.46	1797.25
39.3415	0.043759	1983.1	1983.57					39.3415	-0.32249	1928.47	1929.49					39.3415	0.272826	1727.93	1726.61					39.3415	-0.531546	1769.63	1771.95					39.3415	0.080132	1798.27	1797.96
39.3927	-0.06551	1981.68	1982.92					39.3927	-0.32463	1928.64	1929.66					39.3927	0.332874	1728.48	1727.02					39.3927	-0.369689	1769.82	1771.43					39.3927	-0.0854	1798.23	1798.56
39.444	-0.01532	1980.59	1981.95					39.444	-0.22506	1928.95	1929.66					39.444	0.0968062	1727.88	1727.38					39.444	-0.519448	1768.98	1771.23					39.444	0.202893	1798	1797.21
39.4953	-0.15241	1979.46	1980.65					39.4953	-0.11904	1929.44	1929.81					39.4953	-0.244338	1726.8	1727.55					39.4953	-0.71382	1768.46	1771.57					39.4953	0.357743	1798.13	1796.75
39.5465	-0.62272	1977.84	1980.07					39.5465	-0.14223	1929.42	1929.87					39.5465	-0.0063053	1727.1	1727.62					39.5465	-0.623236	1769.12	1771.83					39.5465	0.27897	1799.93	1798.85
39.5978	-0.82963	1976.88	1980.35					39.5978	-0.26574	1928.63	1929.46					39.5978	0.190822	1727.44	1727.12					39.5978	-0.649024	1769.29	1772.11					39.5978	0.479362	1802.17	1800.31
39.6491	-0.77931	1976.93	1980.21					39.6491	-0.61694	1927.4	1929.35					39.6491	0.113092	1727.08	1726.81					39.6491	-0.955707	1768.34	1772.5					39.6491	0.59443	1802.69	1800.39
39.7003	-0.72578	1977.53	1980.07					39.7003	-0.94026	1926.9	1929.87					39.7003	-0.0067751	1726.52	1726.7					39.7003	-1.07376	1767.83	1772.51					39.7003	0.610678	1803.03	1800.66
39.7516	-0.56422	1978.36	1980.45					39.7516	-1.01983	1926.86	1930.08					39.7516	-0.0285514	1726.12	1726.54					39.7516	-0.644444	1769.2	1772.01					39.7516	0.979375	1804.37	1800.57
39.8028	-0.44788	1978.91	1980.63					39.8028	-1.01383	1926.7	1929.9					39.8028	0.1371	1726.12	1726.21					39.8028	-0.272586	1770.89	1772.07					39.8028	1.37181	1805.37	1800.05
39.8541	-0.55223	1978.8	1980.71					39.8541	-1.06363	1926.87	1930.23					39.8541	0.193783	1726.18	1725.66					39.8541	-0.494824	1770.81	1772.97					39.8541	1.60481	1806.26	1800.04
39.9054	-0.69768	1978.31	1981.02					39.9054	-1.04763	1927.2	1930.51					39.9054	0.0745996	1726.21	1725.54					39.9054	-0.763653	1770.09	1773.41					39.9054	1.51366	1806.42	1800.54
39.9566	-0.56005	1978.39	1981.11					39.9566	-0.85502	1927.49	1930.18					39.9566	-0.182339	1726.07	1725.96					39.9566	-0.669241	1770.01	1772.93					39.9566	1.26347	1805.58	1800.67
40.0079	-0.33473	1978.96	1980.64					40.0079	-0.57207	1927.94	1929.75					40.0079	-0.071845	1726.19	1726.67					40.0079	-0.564704	1770.06	1772.52					40.0079	1.17204	1804.79	1800.24
40.0591	-0.30428	1979.02	1980.3					40.0591	-0.49897	1928.15	1929.72					40.0591	0.165701	1726.56	1726.43					40.0591	-0.690646	1769.88	1772.89					40.0591	0.965802	1803.89	1800.14
40.1104	-0.28954	1979.1	1980.25					40.1104	-0.79729	1927.67	1930.19					40.1104	-0.150996	1726.2	1726.01					40.1104	-0.807179	1769.66	1773.17					40.1104	0.627461	1803.03	1800.59
40.1617	-0.19223	1979.6	1980.26					40.1617	-0.86634	1927.51	1930.24					40.1617	-0.290763	1725.52	1726.71					40.1617	-0.875262	1769.42	1773.23					40.1617	0.515543	1802.57	1800.57
40.2129	0.056182	1979.75	1980.37					40.2129	-0.67326	1927.66	1929.78					40.2129	-0.0221429	1724.83	1726.48					40.2129	-0.995776	1769.13	1773.46					40.2129	0.580083	1802.45	1800.2
40.2642	0.226878	1979.21	1979.52					40.2642	-0.72447	1927.66	1929.94					40.2642	0.253331	1723.91	1724.9					40.2642	-1.07874	1768.74	1773.44					40.2642	0.539772	1802.43	1800.34
40.3155	0.066928	1978.42	1978.3					40.3155	-0.77666	1927.86	1930.31					40.3155	0.391549	1722.71	1723.07					40.3155	-1.164	1768.19	1773.25					40.3155	0.676185	1802.7	1800.08
40.3667	-0.16819	1978.09	1978.15					40.3667	-0.67991	1927.75	1929.89					40.3667	0.083605	1721.89	1721.41					40.3667	-1.02963	1768.19	1772.67					40.3667	0.998983	1803.51	1799.64
40.418	-0.28423	1978.56	1978.77					40.418	-0.49627	1927.75	1929.31					40.418	-0.391765	1722.83	1721.61					40.418	-0.680717	1768.77	1771.73					40.418	0.947892	1803.53	1799.85
40.4692	-0.32679	1978.51	1979.7					40.4692	-0.41955	1927.98	1929.31					40.4692	-0.265355	1724.67	1724.13					40.4692	-0.729845	1768.84	1772.01					40.4692	0.806595	1802.13	1799
40.5205	-0.42244	1977.65	1979.82					40.5205	-0.59447	1927.79	1929.66					40.5205	0.0449937	1725.24	1725.56					40.5205	-0.997491	1768.89	1773.23					40.5205	0.847145	1800.92	1797.64
40.5718	-0.58224	1977.66	1979.35					40.5718	-0.61136	1927.77	1929.7					40.5718	-0.114918	1725.14	1725.09					40.5718	-0.8037	1769.75	1773.25					40.5718	0.64118	1800.29	1797.81
40.623	-0.51434	1978.67	1980					40.623	-0.43319	1928.08	1929.44					40.623	-0.172961	1725.84	1725.53					40.623	-0.547154	1770.27	1772.65					40.623	0.408246	1799.71	1798.13
40.6743	-0.35272	1979.75	1980.73					40.6743	-0.3166	1928.34	1929.34					40.6743	0.0527436	1726.88	1726.42					40.6743	-0.660105	1770.13	1773					40.6743	0.366384	1800.03	1798.61
40.7256	-0.28761	1980.97	1981.16					40.7256	-0.2961	1928.23	1929.17					40.7256	-0.0768758	1727.11	1726.71					40.7256	-0.701117	1769.64	1772.69					40.7256	0.631967	1801.52	1799.07
40.7768	-0.11855	1982.5	1982.13					40.7768	-0.42974	1927.59	1928.95					40.7768	-0.163889	1726.83	1727.36					40.7768	-0.678486	1768.07	1771.02					40.7768	0.979313	1802.88	1799.08
40.8281	0.210345	1984.1	1982.97					40.8281	-0.7063	1926.8	1929.03					40.8281	0.374753	1727.58	1727.37					40.8281	-0.609099	1766.91	1769.56					40.8281	0.927383	1803.43	1799.84
40.8793	0.794535	1985.89	1983.25					40.8793	-0.80629	1926.93	1929.47					40.8793	0.627143	1728.04	1726.33					40.8793	-0.532925	1767.24	1769.56					40.8793	0.904365	1803.46	1799.95
40.9306	1.13392	1986.44	1982.7					40.9306	-0.47277	1928.02	1929.51					40.9306	0.424894	1727.41	1725.95					40.9306	-0.585458	1768.11	1770.66					40.9306	0.991878	1803.28	1799.43
40.9819	0.780144	1984.99	1981.88					40.9819	-0.0918	1928.65	1928.94					40.9819	0.331389	1727.35	1726					40.9819	-0.488284	1769.12	1771.24					40.9819	0.869121	1802.92	1799.55
41.0331	0.348566	1983.66	1981.86					41.0331	-0.09312	1928.68	1928.97					41.0331	0.343864	1727.74	1726.25					41.0331	-0.379198	1769.93	1771.58					41.0331	0.680733	1802.52	1799.88
41.0844	0.370738	1983.56	1982.26					41.0844	-0.54949	1928.07	1929.8					41.0844	0.297648	1727.55	1726.59					41.0844	-0.261829	1770.53	1771.67					41.0844	0.803239	1802.63	1799.52
41.1356	0.70103	1983.9	1982.07					41.1356	-1.12472	1926.82	1930.37					41.1356	-0.121526	1726.4	1726.56					41.1356	-0.328578	1770.17	1771.6					41.1356	1.0892	1802.3	1798.09
41.1869	0.805451	1984.04	1981.08					41.1869	-1.24751	1926.03	1929.96					41.1869	-0.454284	1725.73	1726.81					41.1869	-0.712627	1769.29	1772.39					41.1869	0.941867	1801.08	1797.43
41.2382	0.705999	1984.74	1980.8					41.2382	-0.91779	1926.21	1929.11					41.2382	-0.156473	1726.76	1727.24					41.2382	-0.916761	1769.26	1773.25					41.2382	0.693385	1799.95	1797.26
41.2894	0.740917	1984.98	1981.9					41.2894	-0.62346	1926.81	1928.78					41.2894	0.535725	1728.77	1727.28					41.2894	-0.862908	1769.34	1773.1					41.2894	0.561253	1798.87	1796.7
41.3407	0.59664	1983.49	1982					41.3407	-0.76535	1926.9	1929.32					41.3407	1.00627	1730.23	1726.98					41.3407	-0.770048	1768.99	1772.34					41.3407	0.370533	1798.58	1797.14
41.392	0.327062	1981.94	1981.09					41.392	-0.9384	1926.69	1929.65					41.392	1.01008	1730.47	1726.88					41.392	-0.812318	1768.89	1772.42					41.392	0.350362	1799.13	1797.78
41.4432	0.384828	1981.85	1980.63					41.4432	-0.66738	1927.05	1929.15					41.4432	1.08866	1730.46	1727.11					41.4432	-0.869009	1769.23	1773.02					41.4432	0.482452	1799.71	1797.84
41.4945	0.616982	1982.28	1980.3					41.4945	-0.6089	1926.98	1928.9					41.4945	1.47071	1730.91	1726.84					41.4945	-0.91865	1769.21	1773.21					41.4945	0.48333	1799.8	1797.93
41.5457	0.530676	1981.66	1979.81					41.5457	-0.97268	1925.91	1928.98					41.5457	1.6217	1730.93	1726.02					41.5457	-0.860503	1769.41	1773.16					41.5457	0.175429	1798.63	1797.95
41.597	0.228447	1980.59	1979.53					41.597	-1.11257	1925.35	1928.85					41.597	1.14225	1729.73	1725.54					41.597	-0.624127	1770.04	1772.76					41.597	-0.17312	1797.45	1798.12
41.6483	0.006287	1979.96	1979.67					41.6483	-0.92622	1925.99	1928.91					41.6483	0.527583	1728.26	1725.94					41.6483	-0.663501	1769.55	1772.43					41.6483	-0.05416	1797.64	1797.85
41.6995	-0.3427	1979.42	1979.94					41.6995	-0.77761	1926.74	1929.19					41.6995	0.385112	1727.3	1726.51					41.6995	-0.834344	1768.88	1772.51					41.6995	0.373611	1798.25	1796.81
41.7508	-0.42096	1978.76	1980.8					41.7508	-0.7501	1926.67	1929.04					41.7508	0.43283	1726.24	1726.02					41.7508	-0.726156	1769.43	1772.59					41.7508	0.551486	1797.46	1795.33
41.8021	-0.28757	1978.52	1980.45					41.8021	-0.82039	1926.05	1928.63					41.8021	0.381301	1724.98	1724.8					41.8021	-0.743337	1769.38	1772.62					41.8021	0.505851	1796.31	1794.35
41.8533	-0.55522	1979.22	1979.67					41.8533	-0.88235	1925.45	1928.23					41.8533	0.365555	1724.36	1723.72					41.8533	-0.923265	1768.59	1772.61					41.8533	0.358462	1797.13	1795.74
41.9046	-0.59432	1980.5	1981.45					41.9046	-0.83765	1925.29	1927.93					41.9046	0.329143	1724.39	1723.15					41.9046	-0.918495	1768.61	1772.61					41.9046	0.243184	1799.13	1798.19
41.9558	-0.21107	1981.79	1982.89					41.9558	-0.75139	1925.78	1928.15					41.9558	0.360621	1724.76	1723.3					41.9558	-0.981204	1768.69	1772.96					41.9558	0.397133	1801.33	1799.79
42.0071	0.170367	1983.34	1982.64					42.0071	-0.65528	1926.49	1928.56					42.0071	0.489937	1725.24	1723.56					42.0071	-1.01056	1768.78	1773.18					42.0071	0.506675	1802.96	1800.99
42.0584	0.578462	1985.62	1982.65					42.0584	-0.61029	1926.79	1928.71					42.0584	0.380237	1725.71	1723.61					42.0584	-0.868665	1769.2	1772.99					42.0584	0.596327	1803.47	1801.16
42.1096	0.950725	1987.68	1983.29					42.1096	-0.67275	1926.32	1928.44					42.1096	0.170619	1726.53	1724.45					42.1096	-0.823405	1768.98	1772.56					42.1096	0.817682	1803.37	1800.2
42.1609	1.20495	1988.14	1983.86					42.1609	-0.78674	1925.56	1928.04					42.1609	0.208795	1727.02	1725.96					42.1609	-0.864082	1767.97	1771.73					42.1609	0.727223	1802.69	1799.87
42.2121	1.41148	1988.24	1983.29					42.2121	-0.57222	1925.82	1927.63					42.2121	0.453877	1726.71	1726.33					42.2121	-0.882284	1766.96	1770.8					42.2121	0.566759	1801.66	1799.47
42.2634	1.48833	1989.13	1982.56					42.2634	-0.25909	1926.7	1927.51					42.2634	0.516315	1726.45	1725.2					42.2634	-0.835129	1766.98	1770.61					42.2634	0.598012	1801.06	1798.74
42.3147	1.37237	1989.14	1983.14					42.3147	-0.22695	1927.1	1927.81					42.3147	0.0413461	1726.14	1724.74					42.3147	-0.718548	1768.25	1771.37					42.3147	0.5636	1801.01	1798.83
42.3659	1.1227	1987.93	1983.62					42.3659	-0.31447	1926.93	1927.93					42.3659	-0.19459	1725.96	1726.01					42.3659	-0.662855	1769.22	1772.1					42.3659	0.633688	1800.59	1798.14
42.4172	0.816213	1987.1	1983.41					42.4172	-0.52247	1926.57	1928.21					42.4172	0.0475655	1726.06	1726.61					42.4172	-0.493959	1770.03	1772.18					42.4172	0.853458	1800.44	1797.13
42.4685	0.750847	1987.26	1983.82					42.4685	-0.78761	1926	1928.48					42.4685	-0.116398	1725.26	1725.9					42.4685	-0.0524073	1772.1	1772.33					42.4685	1.00961	1801.41	1797.5
42.5197	0.824594	1987.59	1984.24					42.5197	-0.69066	1925.78	1927.96					42.5197	-0.307527	1723.69	1725.65					42.5197	0.325281	1774.12	1772.7					42.5197	1.0453	1802.21	1798.16
42.571	0.673039	1987.41	1984.27					42.571	-0.35966	1926.55	1927.68					42.571	-0.420163	1722.35	1724.71					42.571	0.432669	1774.78	1772.89					42.571	1.03891	1801.66	1797.64
42.6222	0.556184	1987.15	1984.7					42.6222	-0.21209	1927.1	1927.77					42.6222	-0.511024	1722.43	1723.75					42.6222	0.143341	1773.63	1773.01					42.6222	1.07059	1800.26	1796.11
42.6735	0.684064	1987	1984.91					42.6735	-0.1203	1927.22	1927.6					42.6735	-0.326121	1723.41	1724.12					42.6735	-0.293124	1771.47	1772.75					42.6735	0.972749	1799.39	1795.63
42.7248	0.616416	1986.15	1984.24					42.7248	-0.08621	1927.46	1927.73					42.7248	-0.232995	1723.82	1724.49					42.7248	-0.45634	1770.22	1772.2					42.7248	0.830151	1799.56	1796.35
42.776	0.230569	1985.08	1983.67					42.776	-0.05286	1927.79	1927.96					42.776	-0.122684	1724.31	1724.6					42.776	-0.491355	1769.62	1771.75					42.776	0.694091	1799.99	1797.3
42.8273	-0.20128	1984.36	1984.15					42.8273	0.126702	1928.44	1928.04					42.8273	-0.147177	1724.82	1724.72					42.8273	-0.57741	1769.16	1771.67					42.8273	0.706629	1799.94	1797.2
42.8785	-0.35686	1984.32	1985.17					42.8785	0.297951	1929.14	1928.2					42.8785	-0.0803839	1724.93	1725.31					42.8785	-0.758457	1768.85	1772.15					42.8785	0.929021	1799.43	1795.84
42.9298	0.248505	1985.98	1985.76					42.9298	0.22776	1929.12	1928.41					42.9298	0.234203	1724.77	1725.2					42.9298	-0.85429	1768.87	1772.59					42.9298	0.851274	1798.31	1795.02
42.9811	1.13724	1988.11	1984.98					42.9811	0.003424	1928.55	1928.54					42.9811	0.229593	1724.18	1723.99					42.9811	-0.644611	1769.75	1772.56					42.9811	0.681437	1797.64	1795
43.0323	1.28459	1987.88	1983.53					43.0323	-0.07838	1928.01	1928.25					43.0323	-0.0861471	1723.73	1723.42					43.0323	-0.425632	1770.58	1772.43					43.0323	0.625233	1797.6	1795.18
43.0836	0.731661	1985.39	1982.71					43.0836	-0.04937	1927.76	1927.91					43.0836	-0.444726	1723.44	1724.02					43.0836	-0.296041	1771.2	1772.48					43.0836	0.399678	1797.82	1796.27
43.1349	0.349262	1984.79	1982.44					43.1349	0.070283	1927.89	1927.67					43.1349	-0.511649	1723.1	1724.91					43.1349	-0.220174	1771.52	1772.48					43.1349	0.316917	1799.33	1798.11
43.1861	0.775732	1987.82	1983.39					43.1861	0.140037	1927.75	1927.31					43.1861	-0.499519	1723.43	1724.8					43.1861	-0.339628	1770.89	1772.37					43.1861	0.435525	1800.53	1798.84
43.2374	1.50309	1991.04	1984.69					43.2374	-0.10367	1926.94	1927.26					43.2374	-0.455388	1724.24	1725.09					43.2374	-0.399005	1770.16	1771.89					43.2374	0.324223	1800.66	1799.4
43.2886	1.5635	1991.24	1984.98					43.2886	-0.38076	1926.29	1927.49					43.2886	-0.271151	1724.31	1725.76					43.2886	-0.349278	1769.75	1771.27					43.2886	0.06146	1800.69	1800.46
43.3399	1.09596	1989.51	1984.94					43.3399	-0.38403	1926.52	1927.73					43.3399	-0.357825	1723.86	1725.21					43.3399	-0.339087	1769.89	1771.36					43.3399	0.114597	1800.42	1799.97
43.3912	0.849466	1987.93	1985.09					43.3912	-0.30687	1927.11	1928.07					43.3912	-0.383381	1724.21	1725.05					43.3912	-0.347895	1770.23	1771.74					43.3912	0.208967	1799.66	1798.85
43.4424	0.531325	1985.87	1984.51					43.4424	-0.42936	1926.92	1928.28					43.4424	-0.364986	1724.29	1725.48					43.4424	-0.334006	1770.38	1771.83					43.4424	0.034248	1799.03	1798.9
43.4937	-0.13678	1984.15	1983.73					43.4937	-0.46052	1926.53	1927.98					43.4937	-0.454863	1723.89	1725.51					43.4937	-0.251875	1770.57	1771.67					43.4937	0.08116	1799.69	1799.37
43.545	-0.41704	1983.78	1984.7					43.545	-0.30152	1926.74	1927.69					43.545	-0.440715	1723.93	1725.41					43.545	-0.133919	1770.39	1770.97					43.545	0.155122	1800.61	1800.01
43.5962	-0.2304	1983.33	1985.46					43.5962	-0.35928	1926.62	1927.75					43.5962	-0.445689	1724.14	1725.4					43.5962	-0.104108	1769.89	1770.34					43.5962	-0.00597	1800.48	1800.5
43.6475	-0.10327	1982.33	1984.26					43.6475	-0.49557	1926.09	1927.65					43.6475	-0.310946	1724.21	1725.63					43.6475	-0.216075	1769.4	1770.34					43.6475	-0.1711	1799.46	1800.13
43.6987	-0.32317	1980.99	1982.74					43.6987	-0.4851	1925.93	1927.46					43.6987	-0.279887	1723.47	1725.24					43.6987	-0.318977	1769.4	1770.79					43.6987	-0.30554	1798.53	1799.71
43.75	-0.6124	1980.09	1982.29					43.75	-0.29941	1926.37	1927.31					43.75	-0.390051	1723.04	1724.4					43.75	-0.566276	1769.82	1772.28					43.75	-0.4975	1798.33	1800.26
43.8013	-0.49866	1980.37	1982.55					43.8013	0.109996	1927.72	1927.37					43.8013	-0.0695684	1724.01	1724.34					43.8013	-0.84504	1769.9	1773.58					43.8013	-0.61032	1798.09	1800.46
43.8525	-0.3548	1980.5	1982.37					43.8525	0.362172	1928.71	1927.57					43.8525	0.33439	1724.6	1724.24					43.8525	-0.760101	1769.52	1772.83					43.8525	-0.42777	1797.49	1799.15
43.9038	-0.46456	1980.13	1981.93					43.9038	0.197228	1928.08	1927.45					43.9038	0.260061	1723.61	1723.49					43.9038	-0.589913	1769.06	1771.62					43.9038	-0.18635	1797.59	1798.31
43.955	-0.48976	1980.25	1982					43.955	0.112045	1927.91	1927.56					43.955	0.137151	1722.51	1722.75					43.955	-0.587686	1769.23	1771.78					43.955	0.130009	1798.5	1798
44.0063	-0.42557	1980.16	1982.22					44.0063	0.188493	1928.72	1928.12					44.0063	0.10005	1722.27	1722.06					44.0063	-0.597741	1769.88	1772.48					44.0063	0.352691	1798.9	1797.53
44.0576	-0.41793	1979.5	1981.87					44.0576	0.277247	1928.91	1928.04					44.0576	0.0649082	1722.66	1721.93					44.0576	-0.443501	1770.58	1772.51					44.0576	0.19088	1798.71	1797.97
44.1088	-0.38597	1979.49	1981.18					44.1088	0.740381	1929.63	1927.3					44.1088	0.331746	1723.86	1722.44					44.1088	-0.193946	1771.31	1772.16					44.1088	0.051476	1798.46	1798.26
44.1601	-0.35427	1980.24	1981.04					44.1601	0.793873	1930.1	1927.6					44.1601	0.521985	1724.71	1722.75					44.1601	-0.202437	1771.34	1772.22					44.1601	0.157375	1798.22	1797.61
44.2114	-0.35255	1980.4	1981.66					44.2114	0.24083	1929.27	1928.51					44.2114	0.313558	1724.47	1722.97					44.2114	-0.384882	1770.85	1772.52					44.2114	0.247554	1798.41	1797.45
44.2626	-0.20295	1980.48	1981.82					44.2626	-0.15705	1928.34	1928.84					44.2626	-0.0501214	1724.07	1723.43					44.2626	-0.451648	1770.87	1772.83					44.2626	0.189013	1798.16	1797.42
44.3139	-0.12891	1981.06	1981.3					44.3139	-0.40247	1927.65	1928.92					44.3139	-0.263203	1724.16	1724.24					44.3139	-0.450246	1771.13	1773.09					44.3139	0.121063	1797.59	1797.12
44.3651	-0.13364	1981.09	1981.58					44.3651	-0.3059	1927.49	1928.46					44.3651	-0.127688	1724.73	1725.04					44.3651	-0.372706	1771.26	1772.88					44.3651	0.143708	1797.46	1796.91
44.4164	0.171425	1980.45	1981.63					44.4164	-0.11008	1927.58	1927.92					44.4164	0.0454247	1724.98	1725.15					44.4164	-0.317766	1770.8	1772.18					44.4164	0.38918	1797.57	1796.06
44.4677	0.217823	1979.1	1979.76					44.4677	-0.19125	1927.64	1928.25					44.4677	0.060901	1724.51	1724.83					44.4677	-0.355546	1769.73	1771.28					44.4677	0.324167	1797.35	1796.1
44.5189	-0.21163	1978.27	1978.22					44.5189	-0.50536	1927.23	1928.82					44.5189	-0.0559408	1723.61	1724.31					44.5189	-0.271974	1769.39	1770.58					44.5189	-0.04865	1796.85	1797.04
44.5702	-0.32878	1978.71	1979.12					44.5702	-0.53046	1927.33	1929					44.5702	-0.247349	1722.71	1723.8					44.5702	-0.158147	1769.92	1770.61					44.5702	0.116033	1797.17	1796.72
44.6215	-0.34966	1978.87	1980.03					44.6215	-0.29764	1928.12	1929.05					44.6215	-0.267947	1722.56	1723.54					44.6215	-0.184848	1770.71	1771.52					44.6215	0.463278	1797.88	1796.08
44.6727	-0.55956	1978.94	1980.28					44.6727	-0.40881	1927.81	1929.1					44.6727	-0.229837	1722.65	1723.45					44.6727	-0.263925	1771.32	1772.47					44.6727	0.458503	1798.2	1796.43
44.724	-0.42758	1979.55	1981.19					44.724	-0.50578	1927.09	1928.68					44.724	-0.194562	1722.35	1723.41					44.724	-0.433295	1770.79	1772.68					44.724	0.114131	1798.07	1797.63
44.7752	-0.45849	1979.59	1981.27					44.7752	-0.65708	1926.48	1928.55					44.7752	0.0151467	1722.65	1723					44.7752	-0.541104	1769.87	1772.23					44.7752	-0.14646	1797.68	1798.25
44.8265	-0.77073	1979.56	1981.43					44.8265	-0.83679	1926.24	1928.88					44.8265	0.0568592	1723.35	1722.6					44.8265	-0.487753	1769.97	1772.1					44.8265	-0.0125	1797.11	1797.16
44.8778	-0.6334	1980.1	1982.66					44.8778	-0.55895	1926.9	1928.66					44.8778	-0.264489	1723.47	1723.16					44.8778	-0.430931	1770.91	1772.79					44.8778	0.020493	1796.37	1796.29
44.929	-0.18322	1980.04	1982.65					44.929	-0.23272	1927.4	1928.14					44.929	-0.561001	1723.28	1724.35					44.929	-0.297701	1772.18	1773.48					44.929	-0.21103	1795.77	1796.59
44.9803	0.072145	1979.4	1980.78					44.9803	-0.12888	1927.32	1927.73					44.9803	-0.561281	1723.32	1725.14					44.9803	-0.139732	1772.84	1773.45					44.9803	-0.3039	1795.29	1796.46
45.0315	-0.10872	1978.84	1979.11					45.0315	-0.21302	1926.77	1927.44					45.0315	-0.299451	1724.15	1725.18					45.0315	-0.108981	1772.57	1773.04					45.0315	0.025814	1795.79	1795.69
45.0828	-0.17964	1979.58	1979.28					45.0828	-0.4526	1925.85	1927.28					45.0828	-0.0949494	1725.17	1725.15					45.0828	-0.0601162	1772.61	1772.87					45.0828	0.549148	1797.15	1795.03
45.1341	0.138708	1980.79	1980.3					45.1341	-0.54122	1925.56	1927.26					45.1341	-0.0606388	1725.46	1725.49					45.1341	-0.0429213	1773.23	1773.42					45.1341	0.623014	1797.34	1794.93
45.1853	0.358122	1980.59	1980.24					45.1853	-0.56874	1925.71	1927.5					45.1853	-0.169497	1725.17	1725.67					45.1853	-0.082639	1773.54	1773.9					45.1853	0.258156	1796.97	1795.97
45.2366	0.187549	1979.95	1979.15					45.2366	-0.71625	1925.51	1927.77					45.2366	-0.358159	1724.85	1725.73					45.2366	-0.0671211	1773.14	1773.43					45.2366	0.185807	1798.09	1797.37
45.2879	-0.18789	1980.14	1979.19					45.2879	-0.77272	1925.3	1927.73					45.2879	-0.396572	1724.63	1726.04					45.2879	-0.011367	1772.85	1772.9					45.2879	0.364466	1799.18	1797.77
45.3391	-0.35471	1981.17	1980.89					45.3391	-0.69912	1925.08	1927.29					45.3391	-0.310969	1724.25	1725.95					45.3391	0.134371	1773.29	1772.7					45.3391	0.107326	1799.18	1798.77
45.3904	-0.3886	1981.65	1982.6					45.3904	-0.52471	1924.6	1926.26					45.3904	-0.201088	1724.33	1725.28					45.3904	0.23545	1773.78	1772.76					45.3904	-0.17825	1799.79	1800.48
45.4416	-0.25601	1982.01	1983.21					45.4416	-0.46529	1923.64	1925.1					45.4416	-0.0655112	1724.66	1725					45.4416	0.591632	1775.34	1772.77					45.4416	-0.0991	1801.42	1801.81
45.4929	-0.23601	1982.41	1983.04					45.4929	-0.34137	1923.25	1924.33					45.4929	0.134096	1724.53	1724.88					45.4929	1.55137	1779.07	1772.32					45.4929	0.161826	1803.02	1802.39
45.5442	-0.65908	1981.49	1983.36					45.5442	0.055531	1924.02	1923.84					45.5442	0.333153	1724.54	1724.09					45.5442	2.61265	1783.24	1771.87					45.5442	0.402003	1803.7	1802.14
45.5954	-0.72741	1980.88	1984.14					45.5954	0.492317	1925.01	1923.46					45.5954	0.352079	1725.03	1723.44					45.5954	3.29392	1786.13	1771.8					45.5954	0.357491	1803.68	1802.29
45.6467	-0.18246	1981.26	1983.81					45.6467	0.758642	1925.34	1922.95					45.6467	0.38857	1725.9	1723.86					45.6467	3.67657	1787.81	1771.82					45.6467	0.211704	1803.15	1802.33
45.6979	0.119824	1980.85	1981.99					45.6979	0.262378	1924.1	1923.28					45.6979	0.325048	1726.38	1724.61					45.6979	3.76538	1787.81	1771.44					45.6979	0.069378	1802.01	1801.74
45.7492	-0.02237	1980.14	1980.37					45.7492	-0.38207	1923.51	1924.71					45.7492	0.0360787	1726.25	1725.3					45.7492	3.52201	1786.23	1770.92					45.7492	-0.12909	1800.95	1801.45
45.8005	-0.19107	1979.98	1980.23					45.8005	-0.47224	1924.2	1925.69					45.8005	0.0595941	1726.19	1726.13					45.8005	3.11556	1784.36	1770.82					45.8005	-0.35542	1800.11	1801.48
45.8517	-0.41705	1979.73	1980.75					45.8517	-0.63048	1924.12	1926.11					45.8517	0.0916923	1725.6	1725.99					45.8517	2.94515	1784.15	1771.34					45.8517	-0.371	1799.78	1801.22
45.903	-0.66299	1979.82	1981.41					45.903	-0.7253	1924.27	1926.56					45.903	-0.115678	1724.92	1725.29					45.903	3.42351	1786.66	1771.77					45.903	-0.40366	1799.6	1801.16
45.9543	-0.57811	1980.93	1982.48					45.9543	-0.43345	1925.4	1926.77					45.9543	-0.0792336	1725.02	1725.3					45.9543	3.96048	1789.15	1771.93					45.9543	-0.72734	1798.65	1801.48
46.0055	-0.19544	1982.34	1983.26					46.0055	-0.26899	1926.08	1926.92					46.0055	0.0841941	1725.38	1725.29					46.0055	4.0315	1789.86	1772.32					46.0055	-0.83005	1798.09	1801.32
46.0568	0.013718	1982.83	1983.13					46.0568	-0.53323	1925.83	1927.51					46.0568	0.0383648	1725.51	1725.1					46.0568	3.87417	1789.05	1772.2					46.0568	-0.64392	1798	1800.5
46.108	0.097714	1982.66	1982.77					46.108	-0.88667	1925.39	1928.18					46.108	-0.0072847	1725.33	1725.38					46.108	3.58756	1787.75	1772.15					46.108	-0.54779	1797.18	1799.31
46.1593	0.175559	1981.98	1982.27					46.1593	-0.77538	1925.82	1928.26					46.1593	0.129629	1725.08	1725.35					46.1593	3.31212	1786.75	1772.34					46.1593	-0.47304	1796.96	1798.8
46.2106	0.286541	1981.6	1981.27					46.2106	-0.39811	1926.72	1927.98					46.2106	0.127767	1724.96	1724.65					46.2106	3.17186	1785.57	1771.77					46.2106	-0.4095	1798.07	1799.66
46.2618	0.568002	1981.95	1980.45					46.2618	-0.47776	1926.31	1927.81					46.2618	-0.0987642	1724.72	1724.54					46.2618	3.12368	1784.93	1771.35					46.2618	-0.05835	1799.84	1800.07
46.3131	0.479712	1981.74	1979.67					46.3131	-0.93286	1924.96	1927.9					46.3131	-0.200501	1724.54	1725.05					46.3131	3.14628	1784.52	1770.84					46.3131	0.981292	1803.03	1799.22
46.3644	-0.12388	1981.09	1979.81					46.3644	-1.14143	1924.39	1927.99					46.3644	-0.111026	1724.57	1725.21					46.3644	2.94248	1782.4	1769.62					46.3644	1.85112	1806.49	1799.31
46.4156	-0.59206	1980.84	1981.59					46.4156	-0.94758	1924.89	1927.87					46.4156	-0.0013025	1724.44	1724.94					46.4156	2.45411	1778.96	1768.31					46.4156	2.16119	1809.19	1800.8
46.4669	-0.6832	1981.18	1983.22					46.4669	-0.94136	1925.06	1928.03					46.4669	0.15723	1724.52	1724.45					46.4669	2.18389	1776.86	1767.39					46.4669	2.31676	1811.07	1802.07
46.5181	-0.44352	1982.25	1983.93					46.5181	-1.17516	1924.46	1928.17					46.5181	0.117743	1724.48	1723.99					46.5181	2.23143	1776.6	1766.92					46.5181	2.50123	1812.3	1802.59
46.5694	0.039243	1984.24	1984.04					46.5694	-0.98984	1924.89	1928.01					46.5694	0.0828051	1724.64	1724.08					46.5694	2.28295	1776.85	1766.95					46.5694	3.01493	1814.4	1802.69
46.6207	0.536196	1986.66	1984.09					46.6207	-0.53594	1926.23	1927.92					46.6207	0.13704	1724.94	1724.37					46.6207	2.17865	1777.19	1767.74					46.6207	3.77157	1817.16	1802.51
46.6719	0.896085	1988.13	1984.5					46.6719	-0.39093	1926.26	1927.49					46.6719	-0.0293586	1724.42	1724.48					46.6719	2.06292	1776.89	1767.94					46.6719	4.41498	1819.6	1802.45
46.7232	0.932124	1987.66	1984.52					46.7232	-0.78625	1925.01	1927.49					46.7232	0.173759	1724.76	1724.52					46.7232	1.98521	1775.51	1766.9					46.7232	4.88786	1821.35	1802.37
46.7744	0.476671	1985.38	1983.91					46.7744	-1.10422	1924.73	1928.21					46.7744	0.554474	1725.84	1724.19					46.7744	1.80646	1773.89	1766.06					46.7744	5.12114	1821.43	1801.55
46.8257	-0.10814	1982.62	1983.46					46.8257	-0.91575	1925.72	1928.61					46.8257	0.43368	1726.04	1724					46.8257	1.50703	1772.53	1766					46.8257	4.82665	1819.64	1800.91
46.877	-0.47092	1981.12	1983.06					46.877	-0.76905	1926.09	1928.51					46.877	-0.0110121	1725.84	1724.6					46.877	1.08056	1770.95	1766.27					46.877	4.38763	1817.95	1800.92
46.9282	-0.80873	1980.36	1983.02					46.9282	-0.55763	1925.7	1927.46					46.9282	-0.279944	1725.92	1725.88					46.9282	0.527168	1769.33	1767.05					46.9282	4.21199	1817.19	1800.84
46.9795	-0.88922	1979.71	1983.62					46.9795	-0.38287	1925.2	1926.41					46.9795	-0.222633	1726.09	1726.85					46.9795	0.135353	1768.57	1767.99					46.9795	3.97275	1815.87	1800.45
47.0308	-0.72338	1980	1983.29					47.0308	-0.85099	1924.26	1926.94					47.0308	0.0995062	1726.57	1726.83					47.0308	-0.0626936	1768.33	1768.61					47.0308	3.85361	1813.73	1798.79
47.082	-0.67069	1980.49	1982.91					47.082	-1.19275	1923.95	1927.7					47.082	0.533408	1727.71	1726.24					47.082	-0.36856	1768.24	1769.84					47.082	4.01612	1811.16	1795.63
47.1333	-0.76986	1979.45	1983.19					47.1333	-0.99787	1924.74	1927.89					47.1333	0.660713	1728.48	1725.93					47.1333	-0.352091	1768.97	1770.5					47.1333	4.06675	1807.91	1792.21
47.1845	-0.86161	1978.07	1982.55					47.1845	-0.95005	1925.19	1928.18					47.1845	0.63634	1728.69	1726.28					47.1845	0.0291299	1769.66	1769.53					47.1845	3.95035	1804.87	1789.63
47.2358	-0.62258	1978.22	1981.54					47.2358	-0.90861	1925.26	1928.12					47.2358	0.541882	1728.48	1726.58					47.2358	0.13035	1769.28	1768.72					47.2358	3.64418	1803.29	1789.24
47.2871	-0.4162	1979.28	1980.73					47.2871	-0.77942	1925	1927.45					47.2871	0.381913	1727.94	1726.68					47.2871	-0.0824336	1768.81	1769.17					47.2871	3.33439	1802.21	1789.36
47.3383	-0.47666	1980.33	1980.96					47.3383	-0.8667	1924.36	1927.09					47.3383	0.364497	1727.98	1726.67					47.3383	-0.301739	1768.43	1769.75					47.3383	3.30269	1801.36	1788.63
47.3896	-0.47569	1981.06	1982.24					47.3896	-0.8624	1924.43	1927.15					47.3896	0.380358	1728.13	1726.76					47.3896	-0.300032	1767.67	1768.98					47.3896	3.32643	1801.74	1788.92
47.4409	-0.67853	1980.96	1982.97					47.4409	-0.64808	1925.09	1927.13					47.4409	0.560675	1728.05	1726.87					47.4409	-0.208403	1767.89	1768.8					47.4409	3.224	1802.58	1790.15
47.4921	-0.77301	1980.86	1983.69					47.4921	-0.68697	1925.4	1927.57					47.4921	0.915889	1728.26	1726.18					47.4921	-0.0539269	1769.23	1769.46					47.4921	2.86655	1803.01	1791.94
47.5434	-0.53835	1981.4	1983.97					47.5434	-0.91376	1925.22	1928.1					47.5434	1.02529	1728.43	1725.22					47.5434	0.237827	1769.9	1768.87					47.5434	2.32354	1803.22	1794.23
47.5946	-0.58766	1981.37	1983.57					47.5946	-0.91001	1925.36	1928.22					47.5946	0.711395	1727.91	1725.03					47.5946	0.279831	1770.12	1768.91					47.5946	2.30537	1804.11	1795.19
47.6459	-0.69248	1980.97	1983.74					47.6459	-0.67572	1926.11	1928.24					47.6459	0.176889	1726.94	1725.55					47.6459	0.0255256	1770.33	1770.22					47.6459	2.5913	1805.7	1795.67
47.6972	-0.55506	1980.5	1983.75					47.6972	-0.41633	1926.66	1927.98					47.6972	-0.0578623	1726.47	1726.35					47.6972	-0.0764013	1770.13	1770.46					47.6972	2.40009	1806.46	1797.16
47.7484	-0.4285	1980.19	1982.73					47.7484	-0.37039	1926.48	1927.64					47.7484	0.187799	1726.86	1726.67					47.7484	-0.0924949	1769.36	1769.77					47.7484	2.05285	1805.77	1797.82
47.7997	-0.53474	1980.1	1981.91					47.7997	-0.41056	1926.43	1927.73					47.7997	0.395793	1727.34	1726.24					47.7997	-0.343024	1768.04	1769.53					47.7997	1.66185	1803.6	1797.16
47.8509	-0.62087	1979.94	1982.25					47.8509	-0.14364	1927.38	1927.83					47.8509	0.577733	1727.7	1726.02					47.8509	-0.51832	1767.37	1769.62					47.8509	1.14727	1800.83	1796.38
47.9022	-0.57658	1980.14	1982.44					47.9022	0.248144	1928.42	1927.64					47.9022	1.39735	1728.57	1725.78					47.9022	-0.336318	1768.05	1769.51					47.9022	0.672888	1799.15	1796.55
47.9535	-0.50678	1981.12	1982.46					47.9535	0.423303	1928.8	1927.47					47.9535	2.62697	1729.77	1723.94					47.9535	-0.311143	1768.26	1769.62					47.9535	0.165866	1798.52	1797.88
48.0047	-0.4042	1982.17	1983.16					48.0047	0.689096	1929.66	1927.49					48.0047	3.07782	1730.48	1721.07					48.0047	-0.641181	1767.48	1770.27					48.0047	-0.11925	1798.52	1798.98
48.056	-0.40138	1981.94	1983.8					48.056	1.76038	1933.5	1927.95					48.056	2.88955	1730.57	1720.28					48.056	-0.858379	1766.88	1770.61					48.056	0.046469	1799.12	1798.94
48.1073	-0.34376	1981.44	1983.56					48.1073	3.41451	1939.3	1928.54					48.1073	2.54615	1730.12	1720.99					48.1073	-1.01014	1766.39	1770.78					48.1073	0.243631	1799.38	1798.43
48.1585	-0.31696	1981.24	1982.82					48.1585	4.662	1943.22	1928.53					48.1585	1.92974	1729.94	1721.68					48.1585	-1.20356	1765.99	1771.23					48.1585	0.184625	1799.01	1798.3
48.2098	-0.4	1981.09	1982.51					48.2098	5.61241	1945.5	1927.81					48.2098	1.6551	1730.41	1723.53					48.2098	-1.148	1766.46	1771.46					48.2098	0.016025	1798.69	1798.63
48.261	-0.22418	1982.03	1982.7					48.261	6.349	1947.47	1927.47					48.261	1.60601	1730.42	1724.91					48.261	-0.830596	1767.37	1770.98					48.261	-0.1199	1798.92	1799.39
48.3123	0.23876	1983.71	1982.93					48.3123	6.55169	1948.71	1928.06					48.3123	1.48225	1730.09	1725.08					48.3123	-0.588854	1767.72	1770.28					48.3123	-0.00703	1799.62	1799.65
48.3636	0.764872	1984.93	1982.75					48.3636	6.64182	1949.09	1928.16					48.3636	1.34183	1729.63	1725.17					48.3636	-0.675599	1768.02	1770.95					48.3636	0.184206	1800.22	1799.51
48.4148	0.881553	1984.98	1981.86					48.4148	6.54523	1948.5	1927.87					48.4148	0.969124	1728.56	1725.17					48.4148	-0.623711	1769.09	1771.81					48.4148	0.338585	1800.64	1799.33
48.4661	0.434664	1984.51	1981.44					48.4661	6.01775	1946.94	1927.97					48.4661	0.898703	1728.26	1725.34					48.4661	0.0393646	1771.74	1771.57					48.4661	0.648011	1800.8	1798.29
48.5174	0.088501	1984.82	1982.76					48.5174	5.35073	1944.61	1927.75					48.5174	1.24278	1728.5	1725.27					48.5174	0.833894	1775.03	1771.4					48.5174	0.708055	1800.15	1797.41
48.5686	0.005591	1984.63	1984.46					48.5686	4.85093	1942.84	1927.56					48.5686	1.38799	1727.86	1724.37					48.5686	1.27843	1776.81	1771.25					48.5686	0.326755	1799.19	1797.93
48.6199	-0.15577	1983.43	1984.61					48.6199	4.59623	1941.86	1927.38					48.6199	1.28613	1727.01	1723.26					48.6199	1.53555	1777.69	1771.01					48.6199	0.181987	1799.63	1798.92
48.6711	-0.24697	1982.56	1984.06					48.6711	4.37409	1940.96	1927.18					48.6711	1.09944	1726.32	1722.74					48.6711	1.77096	1778.62	1770.92					48.6711	0.707909	1802.43	1799.68
48.7224	-0.26942	1981.77	1983.55					48.7224	4.16433	1940.7	1927.58					48.7224	0.752914	1725.55	1722.67					48.7224	1.93241	1779.49	1771.09					48.7224	1.55098	1806	1799.98
48.7737	-0.51338	1980.57	1982.85					48.7737	4.14675	1940.72	1927.65					48.7737	0.33597	1724.97	1723.05					48.7737	2.02896	1780.34	1771.52					48.7737	2.09308	1807.79	1799.67
48.8249	-0.68951	1979.96	1982.63					48.8249	4.08828	1940.51	1927.62					48.8249	0.161191	1725.08	1723.85					48.8249	2.11947	1780.77	1771.55					48.8249	2.13767	1807.68	1799.39
48.8762	-0.65104	1980.41	1982.74					48.8762	3.79748	1939.79	1927.83					48.8762	0.0582903	1725.32	1724.55					48.8762	2.10283	1780.64	1771.5					48.8762	1.9346	1806.67	1799.17
48.9274	-0.73287	1980.71	1983.03					48.9274	3.52969	1938.29	1927.17					48.9274	0.0482886	1725.15	1725.13					48.9274	1.94044	1779.88	1771.44					48.9274	1.6352	1804.87	1798.54
48.9787	-0.6774	1981.1	1983.66					48.9787	3.17657	1936.38	1926.37					48.9787	0.13847	1724.63	1724.98					48.9787	1.7422	1778.54	1770.96					48.9787	1.45077	1803.06	1797.44
49.03	-0.40207	1982.12	1983.83					49.03	2.88517	1935.32	1926.24					49.03	-0.0437512	1723.92	1724.17					49.03	1.41286	1777.11	1770.97					49.03	1.32453	1802.06	1796.93
49.0812	-0.20114	1982.43	1983.73					49.0812	3.2915	1936.69	1926.32					49.0812	-0.318294	1723.52	1724.06					49.0812	0.97856	1775.66	1771.4					49.0812	1.28421	1801.82	1796.84
49.1325	0.063097	1981.82	1983.24					49.1325	4.20166	1939.75	1926.52					49.1325	-0.303045	1723.83	1724.58					49.1325	0.62599	1774.51	1771.79					49.1325	1.19243	1801.55	1796.93
49.1838	0.028201	1981.15	1981.56					49.1838	4.92994	1942.17	1926.64					49.1838	-0.103361	1724.65	1724.84					49.1838	0.633091	1774.72	1771.97					49.1838	0.744841	1800.76	1797.88
49.235	-0.18789	1981.24	1981.04					49.235	5.1417	1942.77	1926.58					49.235	-0.164403	1725.01	1724.99					49.235	0.894393	1775.24	1771.36					49.235	0.522668	1800.53	1798.5
49.2863	-0.15596	1981.89	1981.99					49.2863	5.12744	1942.51	1926.36					49.2863	-0.305511	1724.8	1725.55					49.2863	0.952526	1774.73	1770.59					49.2863	0.940025	1801.55	1797.91
49.3375	-0.41698	1981.86	1982.52					49.3375	5.24811	1942.31	1925.79					49.3375	0.0379798	1724.81	1725.82					49.3375	0.796789	1773.89	1770.43					49.3375	1.36159	1802.57	1797.3
49.3888	-0.6989	1981.93	1983.54					49.3888	5.389	1941.35	1924.39					49.3888	0.439577	1724.95	1724.68					49.3888	0.414043	1772.17	1770.37					49.3888	1.32496	1802.58	1797.44
49.4401	-0.60274	1982.5	1984.75					49.4401	5.34837	1939.3	1922.49					49.4401	0.191807	1724.64	1723.5					49.4401	0.0646712	1770.32	1770.03					49.4401	1.33093	1802.39	1797.24
49.4913	-0.5148	1982.17	1984.93					49.4913	5.19812	1937.42	1921.1					49.4913	-0.183868	1724.19	1724					49.4913	-0.0327826	1770.06	1770.2					49.4913	1.33895	1802.11	1796.93
49.5426	-0.48759	1981.01	1984.24					49.5426	5.12119	1936.53	1920.45					49.5426	0.00424075	1724.62	1724.8					49.5426	-0.0434107	1770.66	1770.85					49.5426	1.13016	1801.35	1796.97
49.5938	-0.52102	1980.39	1982.97					49.5938	4.94149	1935.61	1920.1					49.5938	0.259314	1725.36	1724.6					49.5938	-0.0367516	1770.75	1770.91					49.5938	1.1253	1801.01	1796.65
49.6451	-0.57577	1980.54	1982.49					49.6451	4.83275	1934.2	1919.04					49.6451	0.472079	1726.24	1724.5					49.6451	-0.123709	1769.96	1770.49					49.6451	1.26069	1801.05	1796.17
49.6964	-0.48537	1980.92	1982.86					49.6964	4.72099	1933.03	1918.22					49.6964	0.995864	1727.82	1724.67					49.6964	-0.0508572	1769.97	1770.19					49.6964	1.03167	1800.38	1796.39
49.7476	-0.39422	1981.27	1982.87					49.7476	4.31481	1932.65	1919.11					49.7476	1.09578	1728.33	1724.52					49.7476	0.153024	1770.94	1770.27					49.7476	0.4549	1798.64	1796.88
49.7989	-0.39772	1981.38	1982.85					49.7989	4.17845	1933.04	1919.92					49.7989	0.602199	1726.81	1724.69					49.7989	0.380107	1771.91	1770.26					49.7989	0.018144	1796.85	1796.78
49.8502	-0.43911	1981.49	1982.98					49.8502	4.33979	1933.76	1920.13					49.8502	0.179417	1724.96	1724.81					49.8502	0.800118	1773.37	1769.89					49.8502	-0.012	1796.4	1796.44
49.9014	-0.35808	1981.96	1983.26					49.9014	4.23456	1934.88	1921.58					49.9014	-0.0193517	1724.04	1724.37					49.9014	0.957649	1774.55	1770.38					49.9014	0.059185	1796.79	1796.56
49.9527	-0.07388	1982.63	1983.4					49.9527	3.93476	1936	1923.63					49.9527	-0.124014	1723.8	1724.11					49.9527	0.702403	1774.35	1771.3					49.9527	-0.10772	1796.58	1797
50.0039	0.037901	1982.82	1982.93					50.0039	3.69039	1936.82	1925.2					50.0039	-0.130337	1724.25	1724.22					50.0039	0.302011	1772.87	1771.56					50.0039	0.001034	1796.88	1796.88
50.0552	-0.07737	1982.73	1982.66					50.0552	3.29176	1936.69	1926.33					50.0552	0.00130331	1724.73	1724.68					50.0552	-0.0444235	1771.18	1771.37					50.0552	0.458833	1797.93	1796.15
50.1065	-0.00579	1982.63	1983.05					50.1065	2.8821	1935.98	1926.9					50.1065	-0.0944696	1723.72	1724.73					50.1065	-0.139779	1770.14	1770.74					50.1065	0.381297	1797.78	1796.3
50.1577	0.194472	1981.93	1982.65					50.1577	2.97396	1935.92	1926.56					50.1577	-0.583824	1722.57	1724.03					50.1577	-0.294435	1769.74	1771.02					50.1577	-0.03573	1797.58	1797.72
50.209	0.09857	1981.3	1981.15					50.209	2.89855	1934.64	1925.52					50.209	-0.75032	1722.64	1724.51					50.209	-0.506543	1769.48	1771.68					50.209	-0.29492	1798	1799.15
50.2603	-0.17494	1981.28	1980.9					50.2603	2.32816	1932.34	1925.01					50.2603	-0.574673	1722.75	1725.14					50.2603	-0.447072	1769.29	1771.24					50.2603	-0.26208	1797.96	1798.98
50.3115	-0.07753	1981.58	1981.98					50.3115	2.04875	1931.83	1925.38					50.3115	-0.699984	1722.74	1724.66					50.3115	-0.398715	1769.27	1771.01					50.3115	0.212515	1798.27	1797.44
50.3628	0.095758	1982.04	1981.89					50.3628	2.08605	1932.59	1926.02					50.3628	-0.548487	1723.27	1725.06					50.3628	-0.500154	1768.89	1771.07					50.3628	0.441952	1798.68	1796.97
50.414	-0.14709	1982.48	1981.66					50.414	2.23687	1933.4	1926.36					50.414	-0.217404	1723.47	1725.09					50.414	-0.521605	1768.4	1770.67					50.414	0.079554	1798.74	1798.43
50.4653	-0.46612	1982.61	1983.07					50.4653	2.56728	1934.15	1926.07					50.4653	-0.560914	1722.88	1724.19					50.4653	-0.377233	1768.41	1770.05					50.4653	-0.31944	1799.27	1800.51
50.5166	-0.5465	1982.42	1984.48					50.5166	2.93189	1934.65	1925.43					50.5166	-0.794207	1722.85	1724.75					50.5166	-0.159139	1769.21	1769.9					50.5166	-0.23268	1799.74	1800.64
50.5678	-0.38906	1982.59	1984.62					50.5678	2.72779	1933.88	1925.29					50.5678	-0.394563	1723.41	1725.49					50.5678	0.0371845	1770.26	1770.1					50.5678	-0.01049	1799.31	1799.35
50.6191	-0.01866	1982.98	1984.15					50.6191	2.18475	1932.77	1925.89					50.6191	-0.167174	1723.7	1724.72					50.6191	0.2181	1771.01	1770.06					50.6191	-0.06019	1798.87	1799.11
50.6703	0.375364	1983.51	1983.06					50.6703	2.1931	1933.49	1926.58					50.6703	-0.306834	1724.07	1724.26					50.6703	0.190529	1770.95	1770.13					50.6703	-0.05466	1799.13	1799.34
50.7216	0.519443	1983.75	1982					50.7216	2.25465	1933.61	1926.51					50.7216	-0.454663	1724.24	1725.09					50.7216	-0.17337	1769.59	1770.34					50.7216	-0.02777	1799.08	1799.19
50.7729	0.626232	1983.99	1981.66					50.7729	1.88101	1932.18	1926.26					50.7729	-0.389556	1724.02	1725.75					50.7729	-0.601679	1768	1770.62					50.7729	-0.11434	1798.61	1799.05
50.8241	0.843164	1985.64	1981.47					50.8241	1.48054	1930.86	1926.2					50.8241	-0.088695	1723.91	1725.31					50.8241	-0.88197	1767.27	1771.11					50.8241	0.018258	1798.4	1798.34
50.8754	1.12661	1987.75	1982.25					50.8754	1.18529	1929.19	1925.46					50.8754	0.157336	1723.44	1724.2					50.8754	-0.987191	1767.41	1771.7					50.8754	0.417728	1798.43	1796.81
50.9267	1.34901	1988.77	1983.21					50.9267	0.97414	1927.74	1924.67					50.9267	0.158821	1722.7	1722.91					50.9267	-0.92941	1767.63	1771.67					50.9267	0.701361	1799.04	1796.33
50.9779	1.22393	1988.67	1983.34					50.9779	0.901384	1927.46	1924.62					50.9779	0.0732557	1721.95	1722.17					50.9779	-0.760968	1767.61	1770.92					50.9779	0.775149	1799.93	1796.93
51.0292	0.966151	1987.73	1983.75					51.0292	1.08721	1927.74	1924.32					51.0292	0.252633	1721.79	1721.7					51.0292	-0.549593	1767.85	1770.24					51.0292	0.899007	1800.91	1797.43
51.0804	0.895654	1986.15	1983.85					51.0804	1.23412	1927.59	1923.71					51.0804	0.339596	1722.48	1720.95					51.0804	-0.488874	1767.9	1770.03					51.0804	0.974649	1801.67	1797.89
51.1317	0.701513	1984.57	1982.55					51.1317	1.2375	1927.45	1923.56					51.1317	0.0679254	1723.3	1721.36					51.1317	-0.6126	1767.7	1770.36					51.1317	0.787989	1801.41	1798.36
51.183	0.287746	1982.79	1981.75					51.183	1.18469	1927.72	1923.99					51.183	0.107488	1724.37	1723.08					51.183	-0.680399	1767.66	1770.61					51.183	0.590993	1800.67	1798.38
51.2342	0.160474	1981.85	1981.63					51.2342	0.972653	1927.93	1924.87					51.2342	0.288181	1724.84	1724.01					51.2342	-0.755813	1767.2	1770.48					51.2342	0.615404	1800.18	1797.8
51.2855	0.204646	1982.72	1981.21					51.2855	0.96908	1928.37	1925.32					51.2855	0.0470274	1724.3	1723.88					51.2855	-0.903848	1766.19	1770.11					51.2855	0.725298	1799.78	1796.98
51.3368	0.304671	1984.38	1981.89					51.3368	1.20657	1928.69	1924.9					51.3368	-0.0979481	1724.02	1724.14					51.3368	-0.924672	1765.66	1769.67					51.3368	0.574409	1799.17	1796.94
51.388	0.866105	1987.57	1983.16					51.388	1.61075	1929.42	1924.36					51.388	0.231588	1724.02	1724.35					51.388	-0.861555	1766.38	1770.13					51.388	0.266217	1798.64	1797.61
51.4393	1.51171	1990.65	1984.09					51.4393	2.14934	1931.32	1924.56					51.4393	0.430208	1723.66	1723.26					51.4393	-0.673689	1767.73	1770.66					51.4393	0.052217	1798.03	1797.83
51.4905	1.46072	1989.87	1984.57					51.4905	2.40128	1932.58	1925.02					51.4905	0.352857	1723.78	1722.24					51.4905	-0.454725	1768.8	1770.78					51.4905	-0.103	1797.31	1797.71
51.5418	1.01109	1986.56	1983.99					51.5418	2.37144	1932.47	1925.01					51.5418	0.426651	1724.64	1722.61					51.5418	-0.514236	1768.99	1771.23					51.5418	0.005287	1797.07	1797.05
51.5931	0.714101	1984.42	1982.49					51.5931	2.16996	1931.18	1924.36					51.5931	0.711257	1725.53	1723.23					51.5931	-0.567249	1768.37	1770.84					51.5931	0.365228	1797.08	1795.67
51.6443	0.807825	1984.43	1981.55					51.6443	1.56476	1929.38	1924.45					51.6443	0.651725	1725.83	1723.17					51.6443	-0.32002	1768.46	1769.85					51.6443	0.370027	1796.63	1795.19
51.6956	1.03176	1985.09	1981.18					51.6956	1.00669	1928.82	1925.65					51.6956	0.593467	1726.84	1723.67					51.6956	-0.0527064	1769.34	1769.57					51.6956	-0.09959	1796.91	1797.3
51.7468	0.786392	1984.36	1980.94					51.7468	0.821599	1928.38	1925.79					51.7468	1.13955	1729.05	1724.87					51.7468	0.0961727	1770.05	1769.63					51.7468	-0.45325	1797.85	1799.61
51.7981	0.477198	1982.98	1981.2					51.7981	0.608638	1927.42	1925.51					51.7981	1.54269	1729.85	1725.26					51.7981	0.248239	1771.3	1770.23					51.7981	-0.3685	1798.2	1799.63
51.8494	0.372296	1982.98	1981.06					51.8494	0.526738	1927.43	1925.78					51.8494	1.68287	1729.27	1724.73					51.8494	0.597729	1773.14	1770.55					51.8494	-0.38328	1798.53	1800.01
51.9006	0.252263	1983.89	1981.48					51.9006	0.461619	1927.38	1925.92					51.9006	1.61068	1728.47	1723.69					51.9006	0.978404	1773.75	1769.5					51.9006	-0.50462	1799.09	1801.05
51.9519	-0.05068	1983.49	1982.88					51.9519	0.008542	1926.43	1926.41					51.9519	1.2185	1727.25	1723.12					51.9519	0.861131	1772.57	1768.83					51.9519	-0.17564	1799.5	1800.18
52.0032	-0.38646	1982.4	1983.7					52.0032	-0.27003	1926.25	1927.1					52.0032	0.959774	1726.04	1723.21					52.0032	0.520897	1771.05	1768.78					52.0032	0.094558	1798.99	1798.62
52.0544	-0.32811	1982.4	1983.95					52.0544	-0.04725	1926.69	1926.84					52.0544	0.791337	1725.14	1722.86					52.0544	0.310502	1769.68	1768.33					52.0544	-0.04389	1798.38	1798.55
52.1057	0.009815	1983.28	1983.72					52.1057	0.362945	1926.96	1925.82					52.1057	0.290184	1724.53	1722.51					52.1057	0.0884348	1768.48	1768.1					52.1057	-0.09318	1798.65	1799.02
52.1569	0.421857	1984.36	1983.24					52.1569	0.624622	1927.48	1925.51					52.1569	-0.286223	1723.92	1723.57					52.1569	-0.0725515	1768.26	1768.58					52.1569	0.070643	1798.44	1798.17
52.2082	0.676344	1984.49	1982.66					52.2082	0.749142	1927.84	1925.48					52.2082	-0.340972	1723.93	1724.87					52.2082	-0.123832	1768.33	1768.87					52.2082	0.084751	1797.98	1797.65
52.2595	0.625424	1984.04	1981.77					52.2595	0.768234	1927.67	1925.25					52.2595	0.0573415	1725.04	1725.06					52.2595	-0.064653	1768.37	1768.65					52.2595	0.086083	1798.52	1798.18
52.3107	0.476445	1983.52	1981.52					52.3107	0.645222	1927.58	1925.55					52.3107	0.0991272	1725.08	1724.84					52.3107	-0.0101404	1769.12	1769.17					52.3107	0.018271	1798.45	1798.38
52.362	0.332452	1982.19	1981.6					52.362	0.641816	1927.52	1925.49					52.362	-0.177262	1724.35	1724.75					52.362	-0.0359962	1769.75	1769.9					52.362	-0.25995	1797.8	1798.81
52.4132	0.035404	1980.02	1980.85					52.4132	0.585265	1926.79	1924.94					52.4132	-0.103164	1724.85	1724.94					52.4132	0.028705	1770.14	1770.02					52.4132	-0.27641	1798.26	1799.33
52.4645	-0.03323	1978.61	1979.88					52.4645	0.297869	1926.01	1925.08					52.4645	-0.107678	1724.93	1725.19					52.4645	0.136511	1771	1770.4					52.4645	0.062127	1798.49	1798.26
52.5158	0.066033	1977.92	1978.75					52.5158	-0.03949	1925.84	1925.96					52.5158	-0.229717	1724.59	1725.29					52.5158	0.147016	1771.55	1770.92					52.5158	0.206214	1797.61	1796.81
52.567	-0.28211	1976.76	1977.66					52.567	-0.05361	1926.28	1926.44					52.567	-0.213172	1724.9	1725.35					52.567	0.0678164	1771.5	1771.21					52.567	-0.02898	1797.32	1797.44
52.6183	-0.4744	1976.51	1977.89					52.6183	0.211278	1926.76	1926.09					52.6183	-0.303578	1724.98	1725.61					52.6183	0.126238	1771.58	1771.03					52.6183	0.055002	1798.15	1797.93
52.6696	-0.17013	1977.83	1978.41					52.6696	0.117434	1926.42	1926.05					52.6696	-0.327155	1725.01	1725.99					52.6696	0.173948	1771.64	1770.89					52.6696	0.340046	1798.66	1797.35
52.7208	0.192864	1979.13	1978.52					52.7208	-0.12093	1926.01	1926.39					52.7208	-0.17849	1725.48	1726.1					52.7208	-0.0195414	1771.36	1771.44					52.7208	0.215934	1798.96	1798.12
52.7721	0.382186	1978.57	1978.36					52.7721	-0.17174	1925.78	1926.32					52.7721	-0.123125	1725.68	1726.07					52.7721	-0.154362	1771.12	1771.79					52.7721	0.07284	1799.62	1799.34
52.8233	0.170476	1975.98	1977.04					52.8233	-0.22753	1925.42	1926.14					52.8233	-0.140948	1725.37	1726.09					52.8233	-0.174106	1771.3	1772.06					52.8233	0.191152	1800.21	1799.47
52.8746	-0.25352	1973.34	1975.3					52.8746	-0.18957	1925.33	1925.93					52.8746	0.197167	1725.7	1725.84					52.8746	-0.171315	1771.55	1772.3					52.8746	0.263077	1800.19	1799.17
52.9259	-0.54975	1972.27	1974.36					52.9259	-0.19875	1925.11	1925.73					52.9259	0.463184	1726.02	1725.05					52.9259	-0.303299	1771.03	1772.35					52.9259	0.298855	1800.24	1799.08
52.9771	-0.68408	1973.46	1974.48					52.9771	-0.13972	1925.66	1926.1					52.9771	0.171284	1725.62	1724.48					52.9771	-0.436685	1770.39	1772.29					52.9771	0.492051	1800.77	1798.86
53.0284	-0.59248	1975.89	1976.21					53.0284	0.250036	1927.48	1926.69					53.0284	0.0592385	1725.82	1725.06					53.0284	-0.387839	1770.15	1771.83					53.0284	0.726614	1800.92	1798.1
53.0797	-0.45889	1977.39	1978.27					53.0797	0.506416	1928.02	1926.42					53.0797	0.25447	1726.15	1725.62					53.0797	-0.450231	1769.58	1771.53					53.0797	1.05195	1801.59	1797.52
53.1309	-0.30817	1978.37	1979.23					53.1309	0.454016	1927.04	1925.62					53.1309	0.207222	1725.74	1725.3					53.1309	-0.510489	1769.59	1771.81					53.1309	1.213	1802.22	1797.52
53.1822	0.088967	1980.18	1979.61					53.1822	0.339273	1926.56	1925.49					53.1822	0.04169	1725.51	1725.05					53.1822	-0.343627	1770.69	1772.18					53.1822	0.842049	1801.37	1798.1
53.2334	0.432336	1981.87	1979.83					53.2334	0.056572	1926.23	1926.05					53.2334	0.0600965	1725.8	1725.37					53.2334	-0.138418	1771.72	1772.32					53.2334	0.421522	1800.28	1798.65
53.2847	0.6606	1983	1980.13					53.2847	-0.30454	1925.49	1926.44					53.2847	-0.0235393	1725.66	1725.6					53.2847	-0.0128542	1772.27	1772.33					53.2847	0.362163	1800.04	1798.63
53.336	1.52725	1986.37	1980.35					53.336	-0.43769	1925.25	1926.63					53.336	-0.281206	1725.14	1725.74					53.336	0.268868	1772.95	1771.78					53.336	0.633526	1800.23	1797.78
53.3872	2.88614	1991.99	1980.24					53.3872	-0.3288	1925.71	1926.75					53.3872	-0.161601	1725.12	1726.07					53.3872	0.622488	1773.42	1770.71					53.3872	0.893212	1800.57	1797.11
53.4385	3.89322	1996.74	1980.39					53.4385	-0.0545	1926.3	1926.47					53.4385	0.32094	1725.65	1725.66					53.4385	0.43443	1772.5	1770.62					53.4385	0.829837	1801.3	1798.08
53.4897	4.6106	2000.45	1981.09					53.4897	0.096446	1926.52	1926.22					53.4897	0.557325	1726.22	1724.58					53.4897	-0.133337	1771.17	1771.75					53.4897	0.741945	1802	1799.12
53.541	4.94602	2002.78	1981.91					53.541	0.089351	1926.8	1926.52					53.541	0.436387	1726.42	1724.37					53.541	-0.392964	1770.86	1772.57					53.541	0.938888	1802.41	1798.78
53.5923	4.63541	2002.26	1982.88					53.5923	0.151912	1927.14	1926.67					53.5923	0.250477	1726.44	1724.97					53.5923	-0.351809	1770.75	1772.28					53.5923	1.11415	1802.18	1797.86
53.6435	3.85284	1999.43	1983.6					53.6435	0.106124	1926.89	1926.56					53.6435	0.0879553	1725.94	1725.6					53.6435	-0.343598	1770.12	1771.61					53.6435	0.959823	1801.37	1797.65
53.6948	2.82637	1995.51	1983.92					53.6948	-0.01175	1926.82	1926.86					53.6948	-0.0812724	1724.96	1725.64					53.6948	-0.37781	1769.55	1771.19					53.6948	0.864332	1801.29	1797.94
53.7461	2.10009	1992.2	1984.13					53.7461	0.116897	1927.48	1927.12					53.7461	-0.0627249	1724.82	1725.23					53.7461	-0.146521	1769.82	1770.45					53.7461	1.06302	1801.6	1797.48
53.7973	1.62869	1989.92	1983.75					53.7973	0.396752	1928.26	1927.01					53.7973	0.0885865	1724.71	1725.03					53.7973	0.405639	1771.6	1769.84					53.7973	1.24256	1801.39	1796.58
53.8486	1.09577	1988.15	1983.36					53.8486	0.633417	1928.96	1926.96					53.8486	-0.0934849	1723.66	1724.41					53.8486	0.680244	1773.33	1770.38					53.8486	0.962537	1801.44	1797.71
53.8998	0.783215	1987.18	1983.74					53.8998	1.02633	1929.94	1926.7					53.8998	-0.37176	1722.84	1723.97					53.8998	0.498908	1773.05	1770.88					53.8998	0.501563	1802.32	1800.37
53.9511	0.639337	1986.77	1984.02					53.9511	1.36437	1930.61	1926.31					53.9511	-0.267126	1722.39	1724.07					53.9511	0.295966	1771.76	1770.48					53.9511	0.559597	1803.36	1801.19
54.0024	0.656384	1987.1	1984.19					54.0024	1.51237	1931.11	1926.35					54.0024	-0.0843641	1722.4	1723.27					54.0024	0.070518	1770.56	1770.25					54.0024	0.748723	1803.32	1800.41
54.0536	0.823213	1987.26	1984.46					54.0536	1.79171	1932.1	1926.45					54.0536	-0.179368	1723.25	1722.68					54.0536	-0.0749231	1770.19	1770.52					54.0536	0.517766	1802.27	1800.26
54.1049	0.741502	1986.35	1983.95					54.1049	1.87046	1932.48	1926.59					54.1049	-0.209564	1723.88	1723.84					54.1049	-0.0719352	1770.47	1770.78					54.1049	0.275011	1801.33	1800.26
54.1562	0.57034	1985.36	1983.37					54.1562	1.60946	1931.87	1926.8					54.1562	-0.0750775	1723.9	1724.58					54.1562	-0.296405	1770.05	1771.34					54.1562	0.148833	1800.74	1800.16
54.2074	0.615047	1984.58	1983.07					54.2074	1.3502	1930.82	1926.56					54.2074	-0.024338	1724.18	1724.15					54.2074	-0.620235	1769.17	1771.87					54.2074	-0.11355	1800.48	1800.92
54.2587	0.635361	1984.1	1982.11					54.2587	1.00899	1929.71	1926.53					54.2587	-0.149725	1724.69	1724.26					54.2587	-0.659619	1767.97	1770.84					54.2587	-0.16068	1800.41	1801.04
54.3099	0.538404	1984.32	1981.55					54.3099	0.678201	1928.83	1926.69					54.3099	-0.44779	1724.54	1725.19					54.3099	-0.560201	1766.45	1768.89					54.3099	0.07536	1799.8	1799.51
54.3612	0.374279	1984.48	1982.16					54.3612	0.546287	1928.03	1926.31					54.3612	-0.395325	1724.37	1726.03					54.3612	-0.518372	1765.88	1768.13					54.3612	0.140378	1798.92	1798.37
54.4125	0.302142	1984.05	1982.97					54.4125	0.203559	1926.93	1926.29					54.4125	-0.0946672	1724.55	1725.68					54.4125	-0.592081	1766.08	1768.65					54.4125	0.329875	1799.5	1798.22
54.4637	0.394603	1983.87	1982.83					54.4637	0.019276	1926.48	1926.42					54.4637	-0.0668931	1724.1	1724.86					54.4637	-0.699626	1766.7	1769.74					54.4637	0.850403	1800.77	1797.48
54.515	0.341932	1984.32	1982.28					54.515	0.265625	1926.85	1926.02					54.515	-0.119423	1723.67	1724.33					54.515	-0.60666	1767.39	1770.03					54.515	0.963068	1799.96	1796.23
54.5662	0.151611	1984.56	1982.94					54.5662	0.153185	1926.54	1926.06					54.5662	-0.0332116	1723.93	1724.07					54.5662	-0.501246	1767.54	1769.71					54.5662	0.618055	1798.3	1795.91
54.6175	0.139977	1984.46	1983.95					54.6175	-0.17483	1926.18	1926.73					54.6175	0.484434	1725.04	1724.04					54.6175	-0.354775	1768.33	1769.87					54.6175	0.350887	1797.17	1795.82
54.6688	0.427349	1985.11	1983.9					54.6688	-0.30663	1926.19	1927.16					54.6688	1.2666	1727.13	1723.43					54.6688	-0.138962	1769.16	1769.77					54.6688	0.174108	1795.89	1795.21
54.72	0.705869	1985.98	1983.39					54.72	-0.32015	1926.41	1927.42					54.72	1.49016	1728.92	1722.93					54.72	-0.43114	1768.28	1770.15					54.72	0.027669	1795.56	1795.45
54.7713	0.526424	1985.71	1983.14					54.7713	-0.14927	1927.09	1927.56					54.7713	1.10854	1728.91	1723.97					54.7713	-0.856391	1767.32	1771.04					54.7713	0.055804	1795.97	1795.75
54.8226	0.083254	1984.63	1983.59					54.8226	0.008581	1927.08	1927.05					54.8226	0.796442	1727.59	1725.22					54.8226	-0.749527	1767.77	1771.02					54.8226	-0.05635	1795.49	1795.71
54.8738	-0.22153	1983.75	1984.3					54.8738	-0.06654	1926.43	1926.64					54.8738	0.823961	1727.13	1724.95					54.8738	-0.664292	1768.25	1771.13					54.8738	-0.23917	1795.32	1796.24
54.9251	-0.2805	1983.76	1984.64					54.9251	-0.03912	1926.75	1926.88					54.9251	0.805864	1727.26	1724.39					54.9251	-0.856322	1768.32	1772.04					54.9251	0.023028	1795.75	1795.67
54.9763	-0.094	1984.3	1984.89					54.9763	0.281761	1927.7	1926.81					54.9763	0.237036	1726.43	1724.58					54.9763	-0.906739	1768.41	1772.35					54.9763	-0.08106	1794.96	1795.28
55.0276	0.214084	1984.85	1984.68					55.0276	0.385064	1927.81	1926.6					55.0276	-0.262976	1725.84	1725.64					55.0276	-0.809285	1768.26	1771.78					55.0276	-0.70607	1794.39	1797.13
55.0789	0.371736	1985.41	1983.99					55.0789	0.310641	1927.85	1926.88					55.0789	0.0428113	1726.62	1726.71					55.0789	-0.920154	1767.77	1771.77					55.0789	-0.79314	1795.38	1798.46
55.1301	0.183723	1985.58	1983.91					55.1301	0.456106	1928.36	1926.92					55.1301	0.432387	1727.55	1726.48					55.1301	-1.06454	1767.5	1772.13					55.1301	-0.56718	1795.92	1798.12
55.1814	0.025622	1985.52	1984.84					55.1814	0.470692	1928.2	1926.71					55.1814	0.469416	1727.35	1726.11					55.1814	-0.902591	1767.79	1771.72					55.1814	-0.55617	1796.17	1798.33
55.2326	0.146237	1985.98	1985.42					55.2326	0.249504	1927.45	1926.67					55.2326	0.307084	1726.39	1725.79					55.2326	-0.653594	1768.46	1771.31					55.2326	-0.50525	1797.22	1799.17
55.2839	0.826617	1988.9	1985.39					55.2839	0.142566	1926.91	1926.46					55.2839	-0.112917	1725.41	1725.37					55.2839	-0.526096	1769.34	1771.63					55.2839	-0.5147	1797.19	1799.18
55.3352	1.9989	1993.39	1985.57					55.3352	0.222615	1926.65	1925.95					55.3352	-0.260267	1725.41	1725.78					55.3352	-0.683126	1769.23	1772.2					55.3352	-0.45687	1796.58	1798.35
55.3864	2.66205	1995.36	1985.34					55.3864	0.288185	1926.69	1925.78					55.3864	0.0240625	1726.13	1726.27					55.3864	-0.800599	1768.6	1772.08					55.3864	-0.12417	1796.8	1797.28
55.4377	2.54513	1994.34	1984.64					55.4377	0.297333	1926.89	1925.96					55.4377	0.098363	1725.88	1726.05					55.4377	-0.671857	1768.39	1771.31					55.4377	0.003004	1796.84	1796.83
55.489	2.02623	1992.35	1984.1					55.489	0.3003	1926.57	1925.62					55.489	-0.0068586	1725.27	1725.56					55.489	-0.520396	1768.7	1770.96					55.489	0.040146	1796.8	1796.65
55.5402	1.47483	1990.55	1984.2					55.5402	0.134989	1925.98	1925.55					55.5402	-0.015137	1725.17	1725.29					55.5402	-0.154172	1770.28	1770.95					55.5402	0.170336	1797.06	1796.4
55.5915	1.10133	1988.55	1984.62					55.5915	-0.0068	1926.21	1926.23					55.5915	0.0949766	1725.19	1725.22					55.5915	0.33904	1772.76	1771.29					55.5915	0.304343	1797.58	1796.4
55.6427	0.779523	1986.45	1984.11					55.6427	0.149638	1926.88	1926.41					55.6427	0.275863	1725.28	1724.87					55.6427	0.673505	1774.81	1771.88					55.6427	0.490076	1798.02	1796.12
55.694	0.722707	1985.77	1983.31					55.694	0.114366	1926.78	1926.42					55.694	0.0298814	1725.02	1724.36					55.694	0.754817	1775.32	1772.04					55.694	0.521916	1798.06	1796.04
55.7453	0.962586	1986.31	1982.86					55.7453	-0.25135	1925.91	1926.7					55.7453	-0.215714	1724.99	1724.92					55.7453	0.637522	1774.71	1771.94					55.7453	0.340595	1798.07	1796.75
55.7965	0.931619	1986.21	1982.44					55.7965	-0.19084	1925.76	1926.36					55.7965	0.0806957	1725.55	1725.71					55.7965	0.700263	1775.14	1772.09					55.7965	0.302598	1798.83	1797.66
55.8478	0.844921	1985.8	1982.46					55.8478	0.130156	1926.33	1925.92					55.8478	0.165873	1725.77	1725.29					55.8478	0.938211	1776.33	1772.25					55.8478	0.524272	1799.94	1797.91
55.8991	0.936515	1986.2	1982.4					55.8991	0.04354	1926.37	1926.23					55.8991	0.378582	1727.01	1725.22					55.8991	0.857659	1775.61	1771.88					55.8991	0.621938	1799.93	1797.52
55.9503	0.822577	1986.17	1982.43					55.9503	-0.14592	1926.55	1927.01					55.9503	1.09542	1729.29	1725.75					55.9503	0.506614	1773.45	1771.24					55.9503	0.407086	1799.33	1797.75
56.0016	0.673439	1985.45	1982.86					56.0016	0.008322	1926.91	1926.88					56.0016	1.26761	1729.79	1725.64					56.0016	0.27813	1771.93	1770.72					56.0016	0.131168	1799.03	1798.52
56.0528	0.687028	1984.77	1982.74					56.0528	0.077227	1926.54	1926.3					56.0528	0.807809	1728.61	1725.57					56.0528	0.126388	1771.23	1770.68					56.0528	0.186948	1799.59	1798.86
56.1041	0.708923	1983.74	1982.01					56.1041	-0.25627	1925.6	1926.4					56.1041	0.504957	1727.8	1725.93					56.1041	-0.0777215	1770.6	1770.94					56.1041	0.542624	1800.63	1798.53
56.1554	0.603159	1982.52	1980.89					56.1554	-0.61565	1924.94	1926.88					56.1554	0.562262	1727.81	1726.12					56.1554	-0.312302	1769.49	1770.84					56.1554	0.790052	1801.01	1797.95
56.2066	0.356589	1982.23	1980.1					56.2066	-0.74906	1924.62	1926.98					56.2066	0.729051	1727.98	1725.94					56.2066	-0.499796	1768.02	1770.19					56.2066	0.677338	1800.71	1798.09
56.2579	0.028072	1982.34	1980.8					56.2579	-0.55296	1924.47	1926.21					56.2579	0.657636	1727.86	1725.55					56.2579	-0.545131	1766.28	1768.65					56.2579	0.529451	1800.18	1798.12
56.3091	-0.13733	1982.52	1982.22					56.3091	-0.27179	1924.85	1925.7					56.3091	0.481615	1727.74	1725.68					56.3091	-0.587937	1764.77	1767.32					56.3091	0.493844	1799.78	1797.86
56.3604	-0.20413	1983.08	1983.08					56.3604	-0.31594	1924.85	1925.84					56.3604	0.413787	1727.57	1726.14					56.3604	-0.53036	1765.15	1767.45					56.3604	0.484755	1799.69	1797.81
56.4117	-0.27385	1982.96	1983.91					56.4117	-0.54732	1924.42	1926.15					56.4117	0.368255	1727.16	1726.19					56.4117	-0.310222	1766.61	1767.96					56.4117	0.480137	1799.9	1798.04
56.4629	-0.051	1982.54	1984.07					56.4629	-0.38024	1924.69	1925.89					56.4629	0.142985	1726.69	1725.94					56.4629	-0.369846	1767.07	1768.68					56.4629	0.327159	1799.66	1798.4
56.5142	0.265658	1982.31	1982.74					56.5142	-0.04217	1925.13	1925.26					56.5142	-0.1322	1726.19	1726.22					56.5142	-0.74969	1766.96	1770.22					56.5142	0.145562	1798.88	1798.31
56.5655	0.345161	1981.95	1981.24					56.5655	-0.07676	1925.46	1925.7					56.5655	0.0811031	1726.35	1726.63					56.5655	-0.931903	1767.42	1771.48					56.5655	0.003863	1798.56	1798.55
56.6167	0.177515	1981.95	1980.57					56.6167	-0.09711	1925.92	1926.23					56.6167	0.473403	1727.23	1726.08					56.6167	-0.848263	1768.03	1771.72					56.6167	-0.09382	1799.09	1799.45
56.668	0.092765	1982.54	1981.23					56.668	0.016752	1925.92	1925.87					56.668	0.497192	1727.64	1725.66					56.668	-0.956255	1767.92	1772.08					56.668	-0.09937	1799.49	1799.88
56.7192	0.180885	1983.3	1982.16					56.7192	-0.0369	1925.75	1925.87					56.7192	0.360388	1727.53	1725.99					56.7192	-1.19074	1767.75	1772.93					56.7192	0.042478	1799.58	1799.41
56.7705	0.05295	1983.34	1982.57					56.7705	0.078858	1926.35	1926.1					56.7705	0.340448	1727.26	1726.34					56.7705	-1.1149	1767.99	1772.84					56.7705	0.045376	1799.25	1799.08
56.8218	-0.10765	1982.62	1983.13					56.8218	0.337964	1926.56	1925.49					56.8218	0.342723	1727.02	1726.13					56.8218	-0.746469	1768.09	1771.34					56.8218	-0.2436	1798.31	1799.26
56.873	0.047311	1981.95	1983.06					56.873	0.224801	1925.63	1924.92					56.873	0.233782	1726.97	1725.89					56.873	-0.550764	1767.9	1770.29					56.873	-0.26306	1797.41	1798.43
56.9243	0.120233	1980.88	1981.76					56.9243	-0.07491	1925.2	1925.43					56.9243	0.171485	1726.68	1726.19					56.9243	-0.492597	1768.6	1770.74					56.9243	0.010125	1796.49	1796.46
56.9756	-0.17117	1979.73	1980.4					56.9756	-0.148	1925.97	1926.43					56.9756	0.0575925	1725.84	1726.11					56.9756	-0.4167	1769.62	1771.43					56.9756	0.019577	1795.78	1795.71
57.0268	-0.38755	1979.58	1980.42					57.0268	-0.01775	1926.55	1926.61					57.0268	-0.0991219	1725.47	1725.64					57.0268	-0.611029	1768.9	1771.56					57.0268	-0.09842	1795.82	1796.2
57.0781	-0.45201	1980.02	1981.14					57.0781	-0.14103	1925.82	1926.27					57.0781	-0.0925863	1725.88	1725.8					57.0781	-0.840982	1767.64	1771.3					57.0781	0.028722	1796.62	1796.51
57.1293	-0.55077	1980.04	1981.84					57.1293	-0.42751	1925.14	1926.48					57.1293	-0.117753	1725.41	1726.18					57.1293	-0.812217	1767.1	1770.63					57.1293	0.246086	1797.46	1796.51
57.1806	-0.54221	1979.85	1982.25					57.1806	-0.56706	1925.03	1926.82					57.1806	-0.0206506	1724.74	1725.8					57.1806	-0.795513	1766.86	1770.32					57.1806	0.240422	1797.47	1796.54
57.2319	-0.52965	1980	1982.04					57.2319	-0.651	1924.63	1926.68					57.2319	0.295541	1724.99	1724.81					57.2319	-0.90369	1766.96	1770.88					57.2319	0.172429	1797.09	1796.42
57.2831	-0.57214	1980.37	1982.13					57.2831	-0.60338	1924.52	1926.41					57.2831	0.639546	1725.2	1724.01					57.2831	-0.936181	1766.86	1770.93					57.2831	0.528182	1797.09	1795.05
57.3344	-0.47571	1980.64	1982.67					57.3344	-0.45399	1924.64	1926.07					57.3344	0.741275	1724.41	1723.08					57.3344	-1.03312	1766.46	1770.95					57.3344	0.92523	1796.51	1792.93
57.3856	-0.17569	1981.15	1982.55					57.3856	-0.34999	1924.58	1925.68					57.3856	0.345741	1722.98	1721.95					57.3856	-0.970615	1767.07	1771.29					57.3856	0.58472	1795	1792.74
57.4369	-0.00028	1981.92	1981.86					57.4369	-0.33853	1924.62	1925.68					57.4369	-0.235601	1722.24	1721.83					57.4369	-0.509719	1768.31	1770.52					57.4369	0.087304	1795.1	1794.76
57.4882	-0.07048	1981.73	1981.92					57.4882	-0.48701	1924.36	1925.89					57.4882	-0.609867	1722.14	1723.02					57.4882	-0.292979	1768.39	1769.66					57.4882	0.069796	1797.19	1796.92
57.5394	-0.17137	1981.13	1982.02					57.5394	-0.60418	1923.9	1925.8					57.5394	-0.495865	1722.68	1724.17					57.5394	-0.413495	1768.14	1769.94					57.5394	0.202379	1798.96	1798.17
57.5907	-0.3012	1980.93	1981.82					57.5907	-0.55625	1923.84	1925.59					57.5907	-0.321737	1723.65	1724.32					57.5907	-0.45317	1768.32	1770.29					57.5907	0.374142	1800.04	1798.59
57.642	-0.27457	1980.76	1982.15					57.642	-0.54056	1923.58	1925.28					57.642	-0.249537	1724.17	1724.72					57.642	-0.620796	1767.81	1770.51					57.642	0.509363	1800.85	1798.88
57.6932	-0.09439	1980.74	1981.86					57.6932	-0.46097	1923.6	1925.05					57.6932	-0.0516031	1724.82	1725					57.6932	-0.866905	1767.63	1771.4					57.6932	0.447453	1800.89	1799.15
57.7445	0.313772	1982.08	1981.12					57.7445	-0.37216	1924.15	1925.32					57.7445	-0.0786406	1725.52	1724.99					57.7445	-0.757361	1768.94	1772.23					57.7445	0.464922	1800.37	1798.57
57.7957	1.36361	1986.19	1980.81					57.7957	-0.49578	1923.93	1925.49					57.7957	-0.113742	1725.98	1725.78					57.7957	-0.516131	1770.07	1772.32					57.7957	0.510597	1799.71	1797.74
57.847	2.62917	1991.36	1980.71					57.847	-0.62277	1923.24	1925.2					57.847	0.0623753	1726.31	1726.36					57.847	-0.392442	1770.22	1771.92					57.847	0.318549	1799.23	1797.99
57.8983	3.04445	1992.88	1980.79					57.8983	-0.43985	1923.38	1924.77					57.8983	0.396815	1726.11	1726.1					57.8983	-0.328776	1770.26	1771.69					57.8983	0.227535	1799.21	1798.33
57.9495	2.5141	1990.18	1980.65					57.9495	-0.12161	1924.17	1924.55					57.9495	0.455654	1726.01	1724.79					57.9495	-0.43111	1769.96	1771.83					57.9495	0.190595	1798.83	1798.09
58.0008	1.91851	1987.08	1980.08					58.0008	0.043282	1924.7	1924.57					58.0008	0.350883	1726.72	1724.5					58.0008	-0.516035	1769.29	1771.54					58.0008	0.188205	1798.83	1798.1
58.0521	1.52837	1984.88	1979.38					58.0521	0.125467	1925.19	1924.8					58.0521	0.963022	1728.61	1725.55					58.0521	-0.475793	1769.05	1771.12					58.0521	0.352128	1799.63	1798.26
58.1033	1.09214	1983.26	1978.74					58.1033	0.153943	1925.44	1924.95					58.1033	1.86447	1730.94	1725.41					58.1033	-0.516754	1769.12	1771.37					58.1033	0.423957	1799.33	1797.68
58.1546	0.856276	1983.26	1978.87					58.1546	0.020041	1924.32	1924.25					58.1546	2.20542	1732.06	1724.74					58.1546	-0.346808	1769.5	1771.01					58.1546	0.516521	1798.09	1796.09
58.2058	0.894898	1984.11	1979.82					58.2058	-0.20525	1923.35	1924					58.2058	2.74816	1733.74	1724.73					58.2058	0.0360667	1770.92	1770.76					58.2058	0.653673	1797.62	1795.1
58.2571	0.814906	1983.43	1980.51					58.2571	-0.12455	1924.39	1924.78					58.2571	3.99878	1737.31	1724.62					58.2571	0.234787	1772.64	1771.62					58.2571	0.879472	1797.77	1794.37
58.3084	0.656655	1982.07	1980.15					58.3084	0.077258	1925.37	1925.13					58.3084	4.7859	1740.11	1724.03					58.3084	0.263038	1773.02	1771.88					58.3084	1.16619	1796.67	1792.17
58.3596	0.615397	1981.86	1979.43					58.3596	-0.09671	1924.92	1925.23					58.3596	5.19773	1741.9	1724.21					58.3596	0.223616	1772.42	1771.45					58.3596	1.08898	1795.23	1791.02
58.4109	0.897576	1983.44	1979.39					58.4109	-0.34392	1924.33	1925.41					58.4109	5.86115	1743.43	1724.63					58.4109	0.0979475	1771.72	1771.29					58.4109	0.901878	1795.34	1791.86
58.4621	1.69559	1986.79	1979.84					58.4621	-0.43828	1924.2	1925.58					58.4621	6.08924	1743.65	1723.97					58.4621	-0.178969	1770.96	1771.74					58.4621	0.956061	1795.78	1792.09
58.5134	2.38391	1989.26	1979.98					58.5134	-0.50774	1924.17	1925.77					58.5134	6.02128	1743.72	1723.44					58.5134	-0.405678	1770.65	1772.42					58.5134	0.911207	1795.18	1791.66
58.5647	2.32589	1988.67	1979.68					58.5647	-0.50121	1924.29	1925.87					58.5647	6.35074	1744.42	1723.73					58.5647	-0.400313	1771.19	1772.93					58.5647	0.728301	1794.32	1791.5
58.6159	1.88676	1986.69	1979.33					58.6159	-0.48745	1924.58	1926.11					58.6159	6.28637	1743.24	1723.34					58.6159	-0.32446	1771.14	1772.55					58.6159	0.764841	1794.06	1791.1
58.6672	1.12192	1984.93	1979.12					58.6672	-0.48419	1924.69	1926.21					58.6672	5.48279	1740.39	1722.38					58.6672	-0.261833	1769.95	1771.09					58.6672	0.836127	1793.91	1790.68
58.7185	0.63079	1984.16	1980.43					58.7185	-0.3738	1924.76	1925.93					58.7185	5.19402	1738.71	1722.2					58.7185	-0.369293	1768.39	1769.99					58.7185	0.592166	1793.36	1791.07
58.7697	0.92556	1984.57	1981.63					58.7697	-0.22236	1925.14	1925.84					58.7697	5.19293	1737.44	1721.49					58.7697	-0.545309	1767.39	1769.76					58.7697	0.193217	1793.39	1792.64
58.821	0.870614	1983.94	1980.85					58.821	-0.08349	1925.57	1925.84					58.821	4.6535	1735.41	1720.24					58.821	-0.569001	1767.79	1770.26					58.821	-0.05434	1794.86	1795.08
58.8722	0.583602	1982.57	1980.44					58.8722	-0.10929	1925.23	1925.58					58.8722	4.02769	1733.68	1719.99					58.8722	-0.662861	1768.16	1771.04					58.8722	0.019537	1796.07	1795.99
58.9235	0.370325	1981.07	1980.22					58.9235	-0.45506	1923.76	1925.19					58.9235	3.64293	1732.88	1720.34					58.9235	-0.725989	1768.27	1771.43					58.9235	0.245335	1796.24	1795.29
58.9748	0.079263	1979.41	1979.59					58.9748	-0.78464	1922.45	1924.91					58.9748	3.63347	1733.07	1720.81					58.9748	-0.626667	1768.72	1771.44					58.9748	0.294119	1796.67	1795.53
59.026	0.105289	1979.01	1979.1					59.026	-0.8225	1922.28	1924.87					59.026	4.11916	1734.32	1721.02					59.026	-0.582386	1768.55	1771.08					59.026	0.236418	1797.16	1796.25
59.0773	0.093961	1979.11	1978.59					59.0773	-0.73169	1922.91	1925.21					59.0773	4.66186	1735.18	1720.66					59.0773	-0.533168	1768.29	1770.6					59.0773	0.290423	1797.71	1796.58
59.1285	-0.01143	1979.32	1978.73					59.1285	-0.79446	1923.2	1925.7					59.1285	5.03302	1735.36	1719.74					59.1285	-0.59502	1768	1770.59					59.1285	0.371797	1798.88	1797.44
59.1798	0.337173	1980.59	1979.37					59.1798	-0.76403	1923.25	1925.65					59.1798	5.28139	1735.42	1718.7					59.1798	-0.808556	1767.19	1770.7					59.1798	0.402687	1799.88	1798.32
59.2311	0.806818	1981.8	1979.24					59.2311	-0.43911	1923.97	1925.35					59.2311	4.72018	1733.65	1717.94					59.2311	-0.758426	1766.91	1770.21					59.2311	0.380704	1799.74	1798.27
59.2823	1.04567	1982.74	1978.56					59.2823	-0.29611	1924.19	1925.12					59.2823	3.93481	1731.12	1718.03					59.2823	-0.667528	1766.96	1769.87					59.2823	0.591957	1799.2	1796.91
59.3336	1.13238	1983.78	1978.54					59.3336	-0.42828	1923.68	1925.03					59.3336	3.98572	1729.81	1718.1					59.3336	-0.795427	1766.82	1770.27					59.3336	0.937399	1799.51	1795.89
59.3849	0.997351	1983.95	1979.23					59.3849	-0.57822	1923.25	1925.07					59.3849	3.92511	1728.83	1716.63					59.3849	-0.864084	1766.94	1770.69					59.3849	0.83981	1799.54	1796.29
59.4361	0.90409	1983.48	1979.94					59.4361	-0.62041	1923.18	1925.14					59.4361	3.18059	1727.63	1715.86					59.4361	-0.71019	1768.42	1771.51					59.4361	0.527523	1798.26	1796.21
59.4874	0.482709	1981.32	1979.85					59.4874	-0.51708	1923.63	1925.25					59.4874	2.56334	1726.84	1717.12					59.4874	-0.308431	1770.96	1772.31					59.4874	0.151395	1797.16	1796.57
59.5386	-0.16024	1978.76	1979.38					59.5386	-0.34008	1924.23	1925.3					59.5386	2.28845	1727.06	1718.36					59.5386	0.120932	1772.89	1772.37					59.5386	0.037711	1797.14	1797
59.5899	-0.2096	1978.58	1979.4					59.5899	-0.17581	1924.64	1925.2					59.5899	2.17016	1727.21	1719.48					59.5899	0.279225	1773.75	1772.53					59.5899	0.348948	1797.36	1796.01
59.6412	-0.10088	1979.37	1979.42					59.6412	0.083588	1925.23	1924.96					59.6412	2.22831	1726.4	1720.02					59.6412	0.199481	1773.31	1772.44					59.6412	0.51795	1797.18	1795.17
59.6924	-0.23742	1979.7	1979.77					59.6924	0.310415	1925.95	1924.97					59.6924	2.05898	1725.99	1719.03					59.6924	-0.0249784	1772.07	1772.18					59.6924	0.438107	1797.32	1795.62
59.7437	-0.30948	1980.05	1980.66					59.7437	0.250305	1925.98	1925.19					59.7437	1.78649	1726.68	1719.17					59.7437	-0.475678	1770.36	1772.43					59.7437	0.539349	1798.53	1796.44
59.795	-0.29175	1980.68	1981.29					59.795	0.125084	1925.91	1925.52					59.795	1.43147	1727.42	1720.76					59.795	-0.783305	1769.15	1772.56					59.795	0.967447	1798.76	1795.02
59.8462	-0.37676	1980.56	1981.85					59.8462	0.045993	1926	1925.85					59.8462	0.819678	1727.54	1722.68					59.8462	-0.720582	1769.35	1772.48					59.8462	0.916467	1796.42	1792.88
59.8975	-0.48268	1979.99	1982.08					59.8975	0.068327	1926.12	1925.91					59.8975	0.736049	1727.57	1724.82					59.8975	-0.627672	1769.84	1772.57					59.8975	0.459299	1794.52	1792.75
59.9487	-0.3931	1979.91	1981.94					59.9487	0.226288	1926.5	1925.79					59.9487	0.832633	1727.76	1725.13					59.9487	-0.618453	1769.7	1772.39					59.9487	0.409375	1795.13	1793.55
60	-0.40632	1978.62	1981.49					60	0.184825	1926.07	1925.49					60	0.564	1727.75	1725					60	-0.65325	1768.78	1771.62					60	0.480501	1796.11	1794.25
60.0513	-0.69316	1977.36	1980.25					60.0513	-0.09117	1925.09	1925.38					60.0513	0.595989	1727.82	1725.88					60.0513	-0.551729	1768.26	1770.66					60.0513	0.275839	1796.16	1795.1
60.1025	-0.81398	1978.03	1980.14					60.1025	-0.36638	1924.46	1925.61					60.1025	0.638777	1727.69	1725.84					60.1025	-0.33699	1768.89	1770.36					60.1025	0.2023	1796.89	1796.11
60.1538	-0.77188	1978.35	1981.3					60.1538	-0.42391	1924.23	1925.56					60.1538	0.437597	1727.44	1725.57					60.1538	-0.349048	1769.34	1770.86					60.1538	0.421137	1797.72	1796.09
60.205	-0.64694	1978.55	1981.45					60.205	-0.12678	1924.87	1925.27					60.205	0.531827	1727.14	1725.98					60.205	-0.50606	1768.99	1771.19					60.205	0.496251	1796.94	1795.02
60.2563	-0.36707	1979.45	1981.15					60.2563	0.35883	1926.19	1925.06					60.2563	0.68287	1726.05	1725.38					60.2563	-0.4253	1768.84	1770.69					60.2563	0.429759	1795.82	1794.15
60.3076	-0.06886	1980.55	1980.92					60.3076	0.481325	1926.22	1924.7					60.3076	0.521285	1725.24	1723.78					60.3076	-0.303621	1768.97	1770.29					60.3076	0.290535	1795.41	1794.29
60.3588	0.035287	1981.79	1980.82					60.3588	0.044936	1924.6	1924.46					60.3588	0.268683	1725.24	1723.51					60.3588	-0.557152	1767.94	1770.36					60.3588	0.163186	1795.22	1794.59
60.4101	-0.10442	1981.78	1981.65					60.4101	-0.38621	1923.68	1924.9					60.4101	0.248163	1725.54	1724.35					60.4101	-0.70603	1766.58	1769.65					60.4101	0.336762	1794.4	1793.1
60.4614	-0.12709	1981.32	1982.2					60.4614	-0.39255	1924.33	1925.57					60.4614	0.345514	1726.01	1724.72					60.4614	-0.47775	1766.94	1769.01					60.4614	0.332263	1792.91	1791.62
60.5126	0.101723	1982.15	1981.83					60.5126	-0.39328	1924.57	1925.8					60.5126	0.357749	1726.21	1724.86					60.5126	-0.534909	1767.87	1770.2					60.5126	0.00653	1792.73	1792.7
60.5639	0.42935	1983.29	1981.74					60.5639	-0.68511	1923.29	1925.45					60.5639	0.376733	1726.23	1725.02					60.5639	-0.722012	1768.17	1771.31					60.5639	-0.00611	1794.36	1794.38
60.6151	0.636216	1983.43	1981.56					60.6151	-0.64049	1923.07	1925.08					60.6151	0.437686	1725.86	1724.97					60.6151	-0.651858	1768.68	1771.52					60.6151	0.131623	1796.03	1795.52
60.6664	0.70122	1982.98	1980.88					60.6664	-0.45038	1923.96	1925.38					60.6664	0.326167	1724.97	1724.41					60.6664	-0.634847	1769.62	1772.38					60.6664	0.119161	1797.49	1797.03
60.7177	0.627859	1982.18	1980.16					60.7177	-0.6577	1923.82	1925.89					60.7177	0.125297	1724.45	1723.89					60.7177	-0.667506	1769.91	1772.81					60.7177	0.023291	1798.67	1798.58
60.7689	0.380061	1981.46	1979.66					60.7689	-0.67896	1923.71	1925.85					60.7689	0.384434	1724.84	1724.03					60.7689	-0.729667	1769.37	1772.54					60.7689	-0.02835	1799.34	1799.45
60.8202	0.251948	1981.61	1979.94					60.8202	-0.3281	1924.5	1925.53					60.8202	0.615784	1725.43	1723.56					60.8202	-0.846954	1769.04	1772.72					60.8202	0.031961	1799.98	1799.85
60.8715	0.148513	1981.95	1980.6					60.8715	-0.4051	1924.81	1926.09					60.8715	0.378434	1726.06	1723.38					60.8715	-0.787652	1769.11	1772.54					60.8715	-0.04767	1800.3	1800.49
60.9227	-0.00687	1982.05	1981.36					60.9227	-0.60195	1924.28	1926.17					60.9227	0.133961	1726.39	1724.8					60.9227	-0.675742	1768.85	1771.79					60.9227	-0.27808	1800.33	1801.41
60.974	-0.01458	1981.89	1982.08					60.974	-0.51975	1923.42	1925.06					60.974	0.188848	1726.09	1725.94					60.974	-0.720701	1768.22	1771.36					60.974	-0.43789	1800.46	1802.16
61.0252	0.134045	1981.82	1981.95					61.0252	-0.51606	1923.29	1924.91					61.0252	0.343235	1725.88	1725.46					61.0252	-0.760854	1767.84	1771.14					61.0252	-0.20775	1800.76	1801.56
61.0765	0.175351	1982.44	1981.28					61.0765	-0.39837	1923.95	1925.21					61.0765	0.0757612	1725.52	1724.74					61.0765	-0.689162	1767.93	1770.92					61.0765	0.283563	1801.1	1800.01
61.1278	0.070821	1983.3	1981.74					61.1278	-0.39906	1923.83	1925.09					61.1278	-0.0061837	1725.41	1725.27					61.1278	-0.611025	1768.27	1770.92					61.1278	0.422542	1800.8	1799.16
61.179	0.244182	1984.46	1983.01					61.179	-0.6245	1923.08	1925.05					61.179	0.124718	1725.68	1725.43					61.179	-0.708908	1768.36	1771.45					61.179	0.354545	1799.75	1798.38
61.2303	0.728688	1986.49	1983.48					61.2303	-0.66637	1922.76	1924.86					61.2303	0.0297615	1725.51	1725.27					61.2303	-0.814761	1768.56	1772.1					61.2303	0.547058	1798.46	1796.34
61.2815	1.17944	1987.36	1983.56					61.2815	-0.51667	1923.11	1924.74					61.2815	-0.108328	1724.99	1725.42					61.2815	-0.749138	1769.08	1772.34					61.2815	0.702016	1796.72	1794.01
61.3328	1.18674	1985.54	1982.61					61.3328	-0.42874	1923.19	1924.54					61.3328	-0.441191	1724.3	1725.35					61.3328	-0.481884	1770.14	1772.23					61.3328	0.715151	1795.07	1792.31
61.3841	0.801125	1983.68	1980.77					61.3841	-0.40405	1922.78	1924.05					61.3841	-0.550659	1724.3	1725.76					61.3841	-0.245695	1770.64	1771.71					61.3841	0.488358	1793.05	1791.17
61.4353	0.526054	1983.25	1980.46					61.4353	-0.58948	1922.11	1923.96					61.4353	-0.369559	1724.67	1726.13					61.4353	-0.52421	1769.3	1771.58					61.4353	0.055817	1793.24	1793.03
61.4866	0.448419	1983.2	1981.14					61.4866	-0.69289	1922.19	1924.37					61.4866	-0.243773	1724.69	1725.9					61.4866	-0.878317	1768.45	1772.27					61.4866	0.194685	1797.57	1796.82
61.5379	0.555001	1984	1981.4					61.5379	-0.32011	1923.62	1924.62					61.5379	-0.094414	1724.82	1725.5					61.5379	-0.824713	1769.29	1772.88					61.5379	0.52587	1800.65	1798.61
61.5891	0.827874	1985.34	1981.77					61.5891	0.017194	1924.91	1924.86					61.5891	0.0119639	1724.61	1725.13					61.5891	-0.644423	1769.92	1772.73					61.5891	0.692934	1801.74	1799.05
61.6404	0.85578	1985.55	1982.01					61.6404	0.300187	1925.52	1924.57					61.6404	0.0654749	1724.12	1724.57					61.6404	-0.581545	1769.65	1772.18					61.6404	0.810522	1802.51	1799.36
61.6916	0.708122	1985.02	1982.11					61.6916	0.295233	1925.28	1924.35					61.6916	0.37574	1723.89	1723.91					61.6916	-0.630243	1769.62	1772.37					61.6916	0.612534	1802.46	1800.08
61.7429	0.604873	1984.16	1982.18					61.7429	-0.19586	1924.43	1925.05					61.7429	0.466454	1723.68	1722.65					61.7429	-0.709277	1769.85	1772.94					61.7429	0.617683	1802.64	1800.24
61.7942	0.406745	1982.43	1981.73					61.7942	-0.49888	1923.72	1925.29					61.7942	0.00262975	1724.46	1722.14					61.7942	-0.769654	1769.21	1772.56					61.7942	0.747495	1802.64	1799.74
61.8454	0.21154	1980.56	1980.79					61.8454	-0.40205	1924.04	1925.31					61.8454	-0.113064	1726.12	1724.45					61.8454	-0.844931	1768.34	1772.02					61.8454	0.584649	1802.37	1800.1
61.8967	0.196713	1979.86	1979.71					61.8967	-0.10774	1925.63	1925.97					61.8967	0.263106	1726.46	1726.49					61.8967	-0.934998	1768.38	1772.45					61.8967	0.465659	1802.06	1800.25
61.9479	0.501571	1980.67	1979.07					61.9479	0.11289	1926.6	1926.24					61.9479	0.304242	1725.75	1725.59					61.9479	-0.90918	1768.91	1772.86					61.9479	0.333589	1801.29	1800
61.9992	0.733862	1980.99	1978.66					61.9992	0.341592	1926.44	1925.37					61.9992	0.0863686	1725.51	1724.74					61.9992	-0.712158	1769.45	1772.55					61.9992	0.264088	1801.24	1800.21
62.0505	0.615038	1980.05	1978.04					62.0505	0.508009	1926.12	1924.52					62.0505	0.205511	1725.91	1725.23					62.0505	-0.514646	1769.92	1772.16					62.0505	0.508937	1801.99	1800.02
62.1017	0.603713	1979.9	1977.59					62.1017	0.548677	1925.39	1923.66					62.1017	0.239966	1726.01	1725.23					62.1017	-0.571644	1770.16	1772.65					62.1017	0.753412	1802.45	1799.53
62.153	0.883194	1981	1977.48					62.153	0.875738	1925.4	1922.65					62.153	0.0843526	1725.67	1725.22					62.153	-0.823143	1770.11	1773.7					62.153	0.634742	1802.19	1799.73
62.2043	1.36757	1982.99	1977.46					62.2043	1.242	1926.24	1922.34					62.2043	0.164185	1725.82	1725.39					62.2043	-0.845835	1769.77	1773.46					62.2043	0.462905	1801.88	1800.09
62.2555	1.57657	1984.02	1977.5					62.2555	1.22206	1926.94	1923.1					62.2555	0.139383	1726.05	1725.28					62.2555	-0.679317	1769.23	1772.19					62.2555	0.588981	1802.01	1799.73
62.3068	1.17823	1982.62	1977.7					62.3068	0.950892	1927.91	1924.92					62.3068	-0.0753353	1725.45	1725.59					62.3068	-0.71321	1768.75	1771.85					62.3068	0.68827	1801.51	1798.84
62.358	0.463322	1980.52	1977.89					62.358	0.759626	1927.56	1925.17					62.358	0.0378028	1725.06	1725.71					62.358	-0.831247	1768.27	1771.88					62.358	0.57078	1800.74	1798.53
62.4093	-0.13775	1979.44	1978.66					62.4093	0.442052	1925.62	1924.23					62.4093	0.463211	1726.01	1724.94					62.4093	-0.732295	1767.73	1770.91					62.4093	0.402977	1800.88	1799.31
62.4606	-0.12015	1979.78	1979.99					62.4606	0.061028	1924.99	1924.8					62.4606	0.740342	1726.97	1724.48					62.4606	-0.43411	1767.37	1769.26					62.4606	0.393769	1801.23	1799.71
62.5118	0.135321	1980.23	1980.26					62.5118	0.057068	1926.16	1925.98					62.5118	0.832517	1726.32	1724.51					62.5118	-0.391738	1766.96	1768.66					62.5118	0.268998	1800.58	1799.54
62.5631	0.023709	1979.83	1979.68					62.5631	0.166858	1926.76	1926.23					62.5631	0.527365	1724.69	1723.55					62.5631	-0.575365	1767.61	1770.11					62.5631	0.066453	1800.05	1799.79
62.6144	-0.1313	1979.29	1979.73					62.6144	0.046953	1926.12	1925.98					62.6144	-0.179476	1723.33	1722.94					62.6144	-0.479696	1769.09	1771.17					62.6144	0.267512	1801.31	1800.27
62.6656	-0.00992	1979	1979.81					62.6656	-0.04796	1926.01	1926.16					62.6656	-0.550206	1722.92	1723.93					62.6656	-0.179044	1769.63	1770.41					62.6656	0.477411	1802.38	1800.53
62.7169	0.008773	1978.76	1979.04					62.7169	0.274974	1926.96	1926.1					62.7169	-0.189245	1724.05	1724.75					62.7169	-0.143184	1769.44	1770.06					62.7169	0.522693	1802.16	1800.13
62.7681	-0.29446	1978.3	1978.72					62.7681	0.420648	1927.44	1926.12					62.7681	0.455484	1725.93	1724.68					62.7681	-0.297984	1769.41	1770.7					62.7681	0.437755	1801.95	1800.25
62.8194	-0.3259	1978.3	1979.49					62.8194	0.222762	1927.09	1926.39					62.8194	0.501918	1726.4	1724.42					62.8194	-0.43835	1769.52	1771.42					62.8194	0.171767	1801.4	1800.74
62.8707	-0.07851	1978.68	1979.61					62.8707	0.199376	1926.76	1926.13					62.8707	0.147125	1725.57	1724.73					62.8707	-0.73419	1769.29	1772.49					62.8707	0.229735	1800.97	1800.08
62.9219	-0.1842	1977.87	1979					62.9219	0.108027	1926.32	1925.98					62.9219	0.080759	1725.46	1725.08					62.9219	-0.774373	1769.8	1773.17					62.9219	0.398189	1801.08	1799.54
62.9732	-0.42176	1976.61	1978.61					62.9732	0.026232	1925.93	1925.85					62.9732	0.229859	1725.89	1725.19					62.9732	-0.450031	1770.5	1772.46					62.9732	0.189698	1801.01	1800.27
63.0244	-0.33067	1976.48	1978.3					63.0244	0.040602	1925.93	1925.8					63.0244	0.322951	1725.38	1725.12					63.0244	-0.327181	1770.27	1771.69					63.0244	0.041919	1801.05	1800.89
63.0757	-0.12142	1976.8	1977.81					63.0757	-0.06187	1925.49	1925.68					63.0757	0.432363	1724.59	1724.3					63.0757	-0.365302	1770.15	1771.74					63.0757	0.054945	1800.91	1800.7
63.127	-0.0766	1976.77	1977.29					63.127	-0.25799	1924.64	1925.46					63.127	0.416638	1725.09	1723.15					63.127	-0.298476	1770.35	1771.64					63.127	0.02568	1800.88	1800.78
63.1782	-0.11623	1976.71	1977.07					63.1782	-0.54817	1924.05	1925.78					63.1782	0.134239	1725.5	1723.71					63.1782	-0.216917	1770.31	1771.25					63.1782	-0.00514	1801.36	1801.38
63.2295	0.077095	1977.39	1977.18					63.2295	-0.44984	1924.2	1925.62					63.2295	-0.0693236	1724.98	1725.05					63.2295	-0.3319	1769.96	1771.4					63.2295	-0.0573	1801.6	1801.82
63.2808	0.402664	1978.47	1977.08					63.2808	-0.12341	1924.52	1924.9					63.2808	0.0243095	1725.18	1725.22					63.2808	-0.467361	1769.82	1771.85					63.2808	0.115854	1801.63	1801.18
63.332	0.456611	1978.81	1976.85					63.332	-0.26119	1924	1924.82					63.332	0.523988	1725.88	1725.1					63.332	-0.209349	1770.56	1771.47					63.332	0.205515	1801.34	1800.54
63.3833	0.385537	1978.62	1976.98					63.3833	-0.60238	1923.24	1925.13					63.3833	1.08475	1726.02	1724.15					63.3833	0.0553514	1770.95	1770.71					63.3833	-0.02293	1801.19	1801.28
63.4345	0.417163	1978.59	1977.08					63.4345	-0.74797	1922.86	1925.21					63.4345	1.19187	1725.92	1722.42					63.4345	-0.0697509	1770.42	1770.72					63.4345	-0.09543	1801.35	1801.72
63.4858	0.330964	1978.29	1976.91					63.4858	-0.68359	1922.72	1924.87					63.4858	0.933562	1725.16	1721.97					63.4858	-0.26123	1769.48	1770.61					63.4858	-0.02843	1800.97	1801.08
63.5371	-0.08915	1977.45	1976.96					63.5371	-0.35985	1922.41	1923.55					63.5371	0.686116	1723.39	1722.06					63.5371	-0.523459	1767.79	1770.07					63.5371	0.10361	1800.68	1800.28
63.5883	-0.36685	1977.32	1977.81					63.5883	0.097095	1922.11	1921.81					63.5883	0.542873	1722.28	1721.12					63.5883	-0.70075	1767.18	1770.22					63.5883	0.325191	1801	1799.74
63.6396	-0.14235	1978.64	1978.79					63.6396	0.197323	1921.73	1921.12					63.6396	0.696145	1722.58	1720.48					63.6396	-0.607418	1767.99	1770.63					63.6396	0.384831	1801.4	1799.91
63.6909	0.135692	1980.52	1979.22					63.6909	-0.12986	1920.55	1920.96					63.6909	0.988041	1722.54	1720.28					63.6909	-0.612015	1767.99	1770.65					63.6909	0.195325	1801.09	1800.33
63.7421	0.273241	1981.83	1979.97					63.7421	-0.48007	1919.33	1920.84					63.7421	1.11589	1721.97	1719.27					63.7421	-0.662408	1767.81	1770.69					63.7421	-0.16712	1800.2	1800.85
63.7934	0.328866	1982.07	1980.74					63.7934	-0.74602	1919.13	1921.47					63.7934	1.07964	1721.71	1718.28					63.7934	-0.541436	1768.2	1770.55					63.7934	-0.42639	1799.66	1801.31
63.8446	0.349672	1981.76	1980.75					63.8446	-0.76586	1919.72	1922.13					63.8446	0.810523	1721.05	1718.13					63.8446	-0.473596	1768.24	1770.29					63.8446	-0.22677	1799.81	1800.69
63.8959	0.475279	1982	1980.35					63.8959	-0.48843	1921.16	1922.69					63.8959	0.629909	1721.13	1718.37					63.8959	-0.533911	1768.46	1770.78					63.8959	0.130308	1800.31	1799.81
63.9472	0.626418	1982.46	1980.09					63.9472	-0.38333	1922.51	1923.72					63.9472	0.802877	1722.51	1719.04					63.9472	-0.49563	1769.17	1771.32					63.9472	0.326952	1800.71	1799.44
63.9984	0.602898	1982.21	1979.94					63.9984	-0.39823	1922.9	1924.15					63.9984	1.22364	1723.14	1719.85					63.9984	-0.418554	1769.72	1771.54					63.9984	0.696991	1802.2	1799.5
64.0497	0.419067	1981.64	1979.79					64.0497	-0.38934	1923.12	1924.35					64.0497	1.1375	1722.18	1719.09					64.0497	-0.351662	1770.2	1771.73					64.0497	1.38265	1804.94	1799.58
64.1009	0.217453	1981.13	1979.96					64.1009	-0.4806	1923.35	1924.87					64.1009	0.582281	1721.31	1718.42					64.1009	-0.345327	1770.16	1771.66					64.1009	1.87798	1806.81	1799.53
64.1522	0.04565	1980.58	1980.26					64.1522	-0.50427	1923.62	1925.2					64.1522	0.698954	1721.66	1719.39					64.1522	-0.390612	1769.83	1771.53					64.1522	1.98258	1807.16	1799.47
64.2035	0.161515	1980.08	1980.4					64.2035	-0.47657	1923.91	1925.41					64.2035	0.781079	1722	1719.34					64.2035	-0.317435	1769.76	1771.14					64.2035	1.9725	1806.84	1799.19
64.2547	0.454441	1979.54	1979.43					64.2547	-0.30499	1924.41	1925.37					64.2547	0.193325	1723.15	1719.42					64.2547	-0.279697	1769.61	1770.82					64.2547	1.83238	1806.21	1799.1
64.306	0.350042	1978.33	1977.72					64.306	0.203041	1925.31	1924.68					64.306	0.0571306	1725.72	1722.51					64.306	-0.294487	1769.54	1770.82					64.306	1.61922	1805.44	1799.17
64.3573	-0.05462	1976.99	1976.93					64.3573	0.52549	1926.18	1924.52					64.3573	0.574727	1727.78	1725.53					64.3573	-0.366244	1769.37	1770.96					64.3573	1.31468	1804.52	1799.43
64.4085	-0.20225	1977.18	1977.21					64.4085	0.471418	1926.72	1925.23					64.4085	1.08931	1728.64	1725.87					64.4085	-0.487956	1769.01	1771.14					64.4085	0.94174	1803.59	1799.94
64.4598	-0.13289	1978.69	1978					64.4598	0.357036	1926.59	1925.46					64.4598	1.22361	1728.46	1725.02					64.4598	-0.590295	1768.71	1771.28					64.4598	0.699468	1803.06	1800.35
64.511	-0.2471	1979.72	1979.23					64.511	0.163218	1926.14	1925.63					64.511	1.18919	1728.26	1724.4					64.511	-0.741296	1768.68	1771.9					64.511	0.638354	1802.35	1799.88
64.5623	-0.39461	1980.1	1980.72					64.5623	0.108803	1926.06	1925.72					64.5623	1.12968	1728.24	1724.31					64.5623	-0.782743	1768.82	1772.22					64.5623	0.731018	1801.48	1798.64
64.6136	-0.24512	1980.64	1981.68					64.6136	0.133239	1925.78	1925.36					64.6136	0.882658	1727.66	1724.48					64.6136	-0.606999	1768.88	1771.52					64.6136	0.551887	1800.67	1798.53
64.6648	0.110311	1980.84	1981.63					64.6648	-0.0499	1924.97	1925.13					64.6648	0.530194	1726.82	1724.73					64.6648	-0.397802	1769.03	1770.76					64.6648	0.110993	1799.48	1799.05
64.7161	0.298478	1980.31	1980.4					64.7161	-0.02545	1924.54	1924.62					64.7161	0.284085	1726.06	1725.06					64.7161	-0.324622	1769.12	1770.53					64.7161	-0.02748	1798.62	1798.72
64.7674	0.243985	1979.69	1979.11					64.7674	0.201317	1924.47	1923.84					64.7674	0.471671	1725.92	1725.12					64.7674	-0.351397	1768.59	1770.12					64.7674	0.133559	1798.5	1797.98
64.8186	0.43569	1979.35	1978.71					64.8186	0.063636	1923.79	1923.59					64.8186	0.669084	1726.22	1724.36					64.8186	-0.400905	1768.04	1769.79					64.8186	0.097197	1798.24	1797.87
64.8699	0.445869	1978.45	1977.6					64.8699	-0.46454	1922.55	1924.01					64.8699	0.554881	1726.38	1724					64.8699	-0.404486	1768.76	1770.51					64.8699	-0.10364	1798.12	1798.53
64.9211	0.00413	1978.83	1976.67					64.9211	-0.84198	1922.09	1924.73					64.9211	0.174657	1726.14	1724.53					64.9211	-0.465342	1769.81	1771.84					64.9211	-0.0301	1798.62	1798.73
64.9724	0.119724	1981.61	1978.81					64.9724	-0.90319	1922.55	1925.39					64.9724	-0.134072	1725.85	1725.56					64.9724	-0.596929	1769.64	1772.24					64.9724	0.067125	1798.64	1798.38
65.0237	0.422717	1982.11	1981.12					65.0237	-0.80198	1923.26	1925.78					65.0237	0.0765084	1725.68	1726.29					65.0237	-0.658771	1768.94	1771.8					65.0237	0.064682	1797.98	1797.73
65.0749	0.162077	1979.63	1980.41					65.0749	-0.53417	1924.07	1925.75					65.0749	0.200271	1725.53	1725.43					65.0749	-0.744898	1768.48	1771.72					65.0749	0.314409	1797.61	1796.4
65.1262	-0.20564	1978.39	1978.98					65.1262	-0.46452	1924.13	1925.59					65.1262	0.109933	1725.82	1724.86					65.1262	-0.787913	1768.11	1771.54					65.1262	0.373192	1797.6	1796.16
65.1774	-0.21597	1979.33	1979.21					65.1774	-0.5899	1923.57	1925.42					65.1774	0.160419	1726.03	1725.46					65.1774	-0.752887	1767.46	1770.74					65.1774	-0.02384	1797.88	1797.97
65.2287	0.051647	1980.58	1980.2					65.2287	-0.42581	1923.58	1924.92					65.2287	0.31198	1725.7	1725.49					65.2287	-0.707429	1766.34	1769.41					65.2287	-0.27965	1798.48	1799.57
65.28	0.203121	1980.83	1980.37					65.28	-0.22059	1924.13	1924.83					65.28	0.387429	1725.19	1724.66					65.28	-0.613636	1765.72	1768.39					65.28	-0.40301	1798.29	1799.85
65.3312	0.303944	1980.34	1980.01					65.3312	-0.34184	1923.98	1925.06					65.3312	0.302392	1724.64	1723.91					65.3312	-0.563069	1765.5	1767.94					65.3312	-0.51853	1797.54	1799.55
65.3825	0.195793	1979.25	1979.12					65.3825	-0.46615	1923.4	1924.87					65.3825	0.434729	1724.39	1723.63					65.3825	-0.629144	1765	1767.73					65.3825	-0.62024	1797.7	1800.11
65.4338	-0.10297	1978.85	1978.46					65.4338	-0.37705	1923.78	1924.96					65.4338	0.565084	1724.45	1722.95					65.4338	-0.701898	1765.42	1768.47					65.4338	-0.76848	1798.3	1801.28
65.485	-0.11712	1979.37	1979.26					65.485	-0.15669	1924.63	1925.13					65.485	0.162476	1724.45	1722.57					65.485	-0.69387	1766.52	1769.53					65.485	-0.61004	1798.61	1800.98
65.5363	0.02828	1979.26	1979.84					65.5363	0.015557	1924.61	1924.56					65.5363	-0.0632308	1725.21	1723.91					65.5363	-0.70278	1766.83	1769.89					65.5363	-0.26614	1798.6	1799.63
65.5875	0.204412	1978.9	1979.15					65.5875	-0.04537	1923.58	1923.72					65.5875	0.0313359	1726.32	1725.42					65.5875	-0.729741	1766.65	1769.82					65.5875	-0.05318	1798.15	1798.35
65.6388	0.128573	1978.69	1978.08					65.6388	-0.38192	1922.35	1923.55					65.6388	-0.103467	1726.04	1726.21					65.6388	-0.776913	1766.35	1769.73					65.6388	0.016125	1797.18	1797.12
65.6901	-0.17479	1978.49	1978.17					65.6901	-0.68738	1921.81	1923.97					65.6901	0.0349182	1725.34	1726.39					65.6901	-0.90007	1766.21	1770.12					65.6901	-0.07024	1796.68	1796.95
65.7413	-0.18424	1978.72	1979.19					65.7413	-0.68608	1922.03	1924.19					65.7413	0.49478	1725.62	1725.22					65.7413	-0.949376	1766.94	1771.06					65.7413	-0.07466	1796.97	1797.26
65.7926	-0.32565	1979.57	1979.46					65.7926	-0.62844	1922.02	1923.99					65.7926	0.500706	1726	1723.98					65.7926	-0.802411	1768.3	1771.79					65.7926	-0.07578	1797.05	1797.35
65.8438	-0.7177	1983.13	1980.89					65.8438	-0.48653	1922.25	1923.78					65.8438	0.248678	1726.07	1724.34					65.8438	-0.581203	1769.2	1771.73					65.8438	-0.21944	1796.92	1797.77
65.8951	-0.17131	1985.77	1986.02					65.8951	-0.37854	1923.03	1924.21					65.8951	0.303236	1726.02	1725.24					65.8951	-0.59955	1768.5	1771.11					65.8951	-0.2777	1796.92	1798
65.9464	0.63431	1981.04	1986.47					65.9464	-0.54009	1923.08	1924.78					65.9464	0.599763	1726	1725.02					65.9464	-0.794258	1767.67	1771.13					65.9464	-0.33098	1797.3	1798.59
65.9976	0.246024	1975.15	1978.51					65.9976	-0.51812	1922.95	1924.58					65.9976	0.62728	1726.13	1724.01					65.9976	-0.622946	1768.73	1771.44					65.9976	-0.29691	1798.04	1799.19
66.0489	-0.34518	1974.56	1974.16					66.0489	-0.1676	1923.41	1923.94					66.0489	0.322408	1726.1	1724.05					66.0489	-0.12778	1770.38	1770.93					66.0489	-0.19716	1798.26	1799.02
66.1002	-0.19894	1976.96	1975.95					66.1002	0.283579	1924.07	1923.18					66.1002	0.550596	1726.41	1725.03					66.1002	0.0979685	1770.75	1770.33					66.1002	-0.24719	1797.69	1798.65
66.1514	0.273381	1979.72	1977.75					66.1514	0.460955	1924.4	1922.95					66.1514	0.945221	1726.27	1724.58					66.1514	-0.149906	1769.65	1770.3					66.1514	-0.3866	1797.35	1798.84
66.2027	0.490408	1980.95	1978.62					66.2027	0.169586	1924.28	1923.75					66.2027	0.966665	1725.52	1723.13					66.2027	-0.364356	1769	1770.58					66.2027	-0.41484	1797.61	1799.21
66.2539	0.358951	1980.15	1978.98					66.2539	-0.09661	1924.07	1924.37					66.2539	0.840657	1724.9	1722.31					66.2539	-0.263248	1769.91	1771.05					66.2539	-0.30173	1797.88	1799.05
66.3052	0.303103	1979.19	1978.71					66.3052	-0.11417	1924.11	1924.47					66.3052	0.77865	1724.58	1722.12					66.3052	-0.0778921	1771.38	1771.72					66.3052	-0.46291	1797.53	1799.32
66.3565	0.199946	1978.39	1977.98					66.3565	-0.12029	1924.12	1924.5					66.3565	1.07832	1725.35	1721.99					66.3565	0.114492	1772.71	1772.21					66.3565	-0.59101	1797.86	1800.15
66.4077	0.008792	1978.07	1977.59					66.4077	-0.27435	1923.73	1924.59					66.4077	0.89003	1725.66	1721.77					66.4077	0.1842	1773.17	1772.37					66.4077	-0.34854	1798.97	1800.32
66.459	0.052778	1979	1978.03					66.459	-0.41358	1923.58	1924.88					66.459	0.491942	1725.19	1722.71					66.459	0.112302	1772.84	1772.35					66.459	-0.26215	1799.11	1800.13
66.5103	0.100272	1979.97	1978.79					66.5103	-0.44317	1923.45	1924.85					66.5103	0.739847	1725.76	1723.56					66.5103	-0.101006	1771.81	1772.25					66.5103	-0.24642	1799.15	1800.11
66.5615	0.056791	1980.5	1979.57					66.5615	-0.45155	1923.37	1924.79					66.5615	0.715029	1726.3	1723.31					66.5615	-0.369055	1770.35	1771.95					66.5615	-0.06913	1799.38	1799.65
66.6128	0.084989	1981.19	1980.28					66.6128	-0.33451	1924.04	1925.09					66.6128	0.299836	1725.6	1723.93					66.6128	-0.505214	1769.6	1771.8					66.6128	0.021664	1798.74	1798.66
66.664	0.016019	1981.94	1980.85					66.664	-0.24986	1924.44	1925.22					66.664	0.299512	1725.61	1724.6					66.664	-0.557252	1769.47	1771.89					66.664	0.098018	1797.55	1797.17
66.7153	-0.09942	1982.17	1981.88					66.7153	-0.10578	1924.37	1924.7					66.7153	0.723179	1726.89	1724.61					66.7153	-0.516862	1769.33	1771.58					66.7153	0.068498	1796.44	1796.17
66.7666	-0.07928	1982.24	1982.57					66.7666	-0.06609	1923.16	1923.37					66.7666	1.18196	1728.06	1724.49					66.7666	-0.56355	1768.96	1771.41					66.7666	-0.08078	1795.63	1795.94
66.8178	-0.06392	1982.57	1982.56					66.8178	-0.50054	1921.48	1923.05					66.8178	1.67854	1729.68	1724.13					66.8178	-0.635283	1768.51	1771.27					66.8178	0.04628	1795.28	1795.1
66.8691	0.093512	1982.79	1982.83					66.8691	-0.71587	1921.81	1924.06					66.8691	2.40752	1731.81	1724.11					66.8691	-0.431779	1768.79	1770.67					66.8691	0.153948	1794.51	1793.91
66.9203	0.257078	1982.72	1982.41					66.9203	-0.68401	1922.4	1924.55					66.9203	2.92733	1732.47	1723.82					66.9203	-0.141346	1769.7	1770.32					66.9203	0.018226	1793.83	1793.76
66.9716	0.237017	1982.89	1981.69					66.9716	-0.7578	1922.38	1924.76					66.9716	3.23793	1732.38	1722.76					66.9716	-0.0471285	1770.21	1770.42					66.9716	-0.16189	1793.8	1794.43
67.0229	0.515022	1983.82	1981.93					67.0229	-0.52991	1923.06	1924.73					67.0229	3.63998	1733.04	1721.64					67.0229	-0.140421	1769.9	1770.52					67.0229	-0.37204	1793.69	1795.13
67.0741	1.1027	1985.81	1981.75					67.0741	-0.20018	1923.24	1923.87					67.0741	3.67601	1732.98	1720.98					67.0741	-0.259906	1769.29	1770.42					67.0741	-0.43223	1794.45	1796.12
67.1254	1.73292	1989.13	1981.38					67.1254	-0.38794	1921.91	1923.13					67.1254	3.31569	1731.72	1720.79					67.1254	-0.398773	1768.69	1770.43					67.1254	-0.2718	1795.42	1796.47
67.1767	2.60168	1993.17	1982.16					67.1767	-0.77667	1921.12	1923.57					67.1767	2.93109	1730.54	1720.73					67.1767	-0.456616	1768.48	1770.46					67.1767	-0.10912	1795.72	1796.14
67.2279	3.14308	1995.24	1982.71					67.2279	-0.67872	1922.26	1924.39					67.2279	2.38977	1729.38	1720.82					67.2279	-0.401496	1768.96	1770.7					67.2279	-0.26923	1795.7	1796.75
67.2792	2.92031	1994.39	1982.6					67.2792	-0.57596	1923.05	1924.86					67.2792	1.62159	1727.59	1721.46					67.2792	-0.481094	1769.26	1771.35					67.2792	-0.33863	1796.09	1797.4
67.3304	2.5022	1992.68	1982.65					67.3304	-0.75166	1922.87	1925.24					67.3304	1.32217	1725.67	1722.21					67.3304	-0.520012	1769.03	1771.29					67.3304	-0.04639	1797.18	1797.36
67.3817	2.01994	1990.87	1982.61					67.3817	-0.69812	1922.82	1925.02					67.3817	1.27845	1724.77	1721.29					67.3817	-0.338812	1768.98	1770.45					67.3817	-0.03037	1797.42	1797.54
67.433	1.51383	1988.87	1982.74					67.433	-0.51589	1922.68	1924.31					67.433	1.1407	1725.4	1720.53					67.433	-0.386438	1768.56	1770.24					67.433	-0.36741	1797.17	1798.59
67.4842	1.13531	1986.86	1982.78					67.4842	-0.52382	1922.41	1924.06					67.4842	1.19879	1725.86	1721.62					67.4842	-0.6914	1767.69	1770.7					67.4842	-0.58299	1797.46	1799.72
67.5355	0.704954	1985.08	1982.29					67.5355	-0.56232	1922.57	1924.34					67.5355	1.07114	1724.9	1721.88					67.5355	-0.850674	1767.71	1771.41					67.5355	-0.56805	1797.52	1799.72
67.5868	0.320832	1983.94	1982.24					67.5868	-0.35818	1923.53	1924.66					67.5868	0.893585	1723.59	1721.35					67.5868	-0.782392	1768.23	1771.64					67.5868	-0.47246	1797.42	1799.25
67.638	0.228088	1983.39	1982.65					67.638	-0.34164	1923.93	1925.01					67.638	1.07068	1722.76	1720.63					67.638	-0.683814	1768.57	1771.55					67.638	-0.31779	1797.42	1798.65
67.6893	0.158138	1983	1982.47					67.6893	-0.566	1923.49	1925.27					67.6893	1.20816	1721.99	1719.22					67.6893	-0.553254	1769.15	1771.56					67.6893	-0.24399	1797.1	1798.05
67.7405	0.325965	1983.62	1982.36					67.7405	-0.38234	1923.61	1924.81					67.7405	0.915199	1721.01	1717.99					67.7405	-0.271253	1769.33	1770.51					67.7405	-0.1038	1797.34	1797.74
67.7918	0.883283	1984.8	1982.31					67.7918	-0.05767	1923.87	1924.06					67.7918	0.41139	1720.81	1717.98					67.7918	-0.176465	1768.65	1769.41					67.7918	0.238769	1798.07	1797.14
67.8431	0.992586	1984.29	1981.25					67.8431	-0.09072	1923.81	1924.1					67.8431	0.36989	1721.29	1719.45					67.8431	-0.323767	1768.23	1769.64					67.8431	0.473734	1798.85	1797.01
67.8943	0.771275	1982.76	1980.3					67.8943	-0.24131	1923.9	1924.66					67.8943	0.609098	1721.22	1720.06					67.8943	-0.465681	1768.28	1770.3					67.8943	0.41102	1799.1	1797.51
67.9456	0.515513	1981.1	1979.66					67.9456	-0.18556	1923.95	1924.53					67.9456	0.453495	1721.19	1719.21					67.9456	-0.536122	1768.51	1770.84					67.9456	0.17239	1797.63	1796.96
67.9968	0.328618	1980.18	1979.03					67.9968	0.071116	1924.26	1924.03					67.9968	0.390507	1721.78	1719.69					67.9968	-0.562821	1768.57	1771.02					67.9968	-0.10832	1795.9	1796.32
68.0481	0.414468	1980.82	1978.86					68.0481	0.174384	1924.7	1924.15					68.0481	0.593395	1722.43	1720.48					68.0481	-0.554946	1767.82	1770.23					68.0481	-0.3844	1795.31	1796.8
68.0994	0.362504	1981.19	1979.16					68.0994	0.183852	1924.87	1924.29					68.0994	0.386828	1722.63	1720.47					68.0994	-0.463125	1767.43	1769.44					68.0994	-0.47529	1795.19	1797.04
68.1506	0.305286	1980.98	1979.74					68.1506	0.405255	1925.5	1924.23					68.1506	-0.0389985	1722.7	1721.35					68.1506	-0.420914	1768.11	1769.93					68.1506	-0.60021	1794.99	1797.31
68.2019	0.320006	1981.03	1979.76					68.2019	0.62361	1926.7	1924.74					68.2019	-0.15961	1723.83	1722.83					68.2019	-0.536332	1768.55	1770.88					68.2019	-0.9095	1795.59	1799.12
68.2532	0.355475	1980.53	1979.75					68.2532	0.777026	1927.75	1925.31					68.2532	-0.152789	1724.63	1724.36					68.2532	-0.618964	1768.51	1771.2					68.2532	-0.73693	1796.76	1799.62
68.3044	0.244955	1980.04	1979.1					68.3044	0.931852	1928.1	1925.17					68.3044	-0.105538	1724.11	1725.14					68.3044	-0.476687	1768.81	1770.88					68.3044	0.044026	1796.33	1796.17
68.3557	-0.02918	1980.62	1979.06					68.3557	0.849053	1928.04	1925.37					68.3557	0.0550824	1724.12	1724.46					68.3557	-0.391187	1769.25	1770.95					68.3557	0.444822	1794.28	1792.56
68.4069	-0.09743	1980.88	1980.74					68.4069	0.801399	1928.3	1925.78					68.4069	0.17506	1724.87	1723.94					68.4069	-0.397007	1769.35	1771.08					68.4069	0.258027	1792.71	1791.72
68.4582	0.046236	1981.36	1981.27					68.4582	0.988825	1928.8	1925.69					68.4582	0.213679	1725.41	1724.29					68.4582	-0.25766	1769.45	1770.57					68.4582	0.07043	1793.19	1792.92
68.5095	0.222167	1982.44	1981.17					68.5095	0.901915	1928.95	1926.11					68.5095	0.0774598	1725.13	1724.7					68.5095	-0.0299806	1770.18	1770.31					68.5095	-0.03409	1795.49	1795.62
68.5607	0.0749	1982.37	1981.55					68.5607	0.672205	1928.52	1926.4					68.5607	-0.136526	1724.54	1724.88					68.5607	0.248826	1771.38	1770.3					68.5607	-0.23123	1797.42	1798.32
68.612	-0.15697	1981.69	1982.07					68.612	0.787372	1928.61	1926.13					68.612	-0.0137556	1724.66	1724.99					68.612	0.380171	1771.86	1770.21					68.612	-0.38174	1798.27	1799.75
68.6632	-0.05141	1981.65	1982.32					68.6632	0.96427	1929.33	1926.3					68.6632	0.0979994	1724.88	1724.71					68.6632	0.380544	1772.06	1770.41					68.6632	-0.20551	1799.12	1799.92
68.7145	0.03818	1982.08	1981.86					68.7145	0.818256	1928.82	1926.24					68.7145	-0.0777484	1725.2	1724.56					68.7145	0.334763	1772.34	1770.89					68.7145	0.043077	1800.18	1800.01
68.7658	-0.04567	1981.84	1981.93					68.7658	0.58665	1927.76	1925.92					68.7658	-0.151521	1725.31	1725.46					68.7658	0.263404	1771.72	1770.57					68.7658	-0.11245	1801.29	1801.73
68.817	-0.08521	1981.25	1982.02					68.817	0.61556	1927.68	1925.74					68.817	-0.182602	1724.62	1725.81					68.817	0.179755	1770.79	1770.01					68.817	-0.40749	1801.93	1803.52
68.8683	-0.21999	1980.94	1981.59					68.8683	0.656823	1927.48	1925.42					68.8683	-0.182125	1724.59	1725.23					68.8683	-0.0272671	1770.33	1770.45					68.8683	-0.19905	1802.34	1803.12
68.9196	-0.36674	1980.34	1981.82					68.9196	0.43431	1926.54	1925.17					68.9196	-0.0552654	1725.12	1725.2					68.9196	-0.238518	1770.14	1771.18					68.9196	0.108006	1802.57	1802.15
68.9708	-0.20484	1980.11	1981.81					68.9708	0.274604	1926.17	1925.3					68.9708	-0.103027	1724.92	1725.31					68.9708	-0.304821	1770.02	1771.35					68.9708	-0.08634	1802.12	1802.46
69.0221	0.178986	1979.97	1980.94					69.0221	0.349427	1926.77	1925.67					69.0221	-0.161595	1724.93	1725.26					69.0221	-0.202101	1770.15	1771.03					69.0221	-0.26257	1801.44	1802.46
69.0733	0.229273	1978.61	1979.25					69.0733	0.501531	1927.1	1925.53					69.0733	-0.0247834	1725.28	1725.46					69.0733	-0.17137	1770.45	1771.2					69.0733	-0.10709	1800.65	1801.07
69.1246	-0.08324	1977.2	1977.69					69.1246	0.590124	1926.67	1924.81					69.1246	0.114031	1724.85	1725.36					69.1246	-0.244194	1770.79	1771.85					69.1246	-0.0786	1799.83	1800.13
69.1759	-0.11235	1977.61	1977.54					69.1759	0.477542	1925.82	1924.32					69.1759	0.180101	1724.1	1724.47					69.1759	-0.109719	1771.36	1771.83					69.1759	0.015647	1799.92	1799.86
69.2271	0.044505	1978.83	1978.06					69.2271	-0.03221	1924.75	1924.85					69.2271	-0.033111	1724.02	1723.5					69.2271	0.032745	1771.75	1771.61					69.2271	0.257682	1800.49	1799.49
69.2784	0.159877	1979.09	1978.65					69.2784	-0.37943	1924.51	1925.71					69.2784	-0.319343	1724.38	1724.13					69.2784	0.176657	1772.5	1771.73					69.2784	0.168617	1800.53	1799.87
69.3297	0.42369	1979.62	1978.44					69.3297	-0.16733	1925.13	1925.65					69.3297	-0.376925	1724.33	1725.44					69.3297	0.658509	1774.61	1771.75					69.3297	0.188915	1800.75	1800.02
69.3809	1.42624	1983.91	1977.92					69.3809	-0.10495	1924.82	1925.14					69.3809	-0.396837	1724.26	1725.58					69.3809	1.0328	1776.53	1772.03					69.3809	0.323877	1800.6	1799.35
69.4322	3.50063	1992.74	1978.18					69.4322	-0.39237	1923.81	1925.05					69.4322	-0.424202	1724.44	1725.58					69.4322	1.16058	1776.75	1771.7					69.4322	0.311469	1799.57	1798.36
69.4834	5.72805	2001.92	1978.69					69.4834	-0.65488	1923.33	1925.39					69.4834	-0.245244	1724.79	1725.85					69.4834	1.1638	1775.71	1770.65					69.4834	0.330908	1798.55	1797.27
69.5347	7.13683	2007.1	1978.92					69.5347	-0.65826	1923.47	1925.54					69.5347	0.0632617	1725.42	1725.6					69.5347	0.792035	1774.31	1770.87					69.5347	0.102604	1797.98	1797.59
69.586	7.8296	2008.83	1978.45					69.586	-0.44564	1923.87	1925.27					69.586	0.069492	1725.43	1725.21					69.586	0.543111	1773.59	1771.23					69.586	-0.02283	1798.45	1798.54
69.6372	8.00078	2009.14	1977.42					69.6372	-0.23231	1924.47	1925.2					69.6372	-0.0886004	1724.81	1725.19					69.6372	0.5015	1772.88	1770.7					69.6372	0.264099	1799.77	1798.74
69.6885	7.57269	2007.81	1977.04					69.6885	-0.02024	1925.46	1925.53					69.6885	-0.193805	1724.54	1725.11					69.6885	0.258894	1771.94	1770.82					69.6885	0.271754	1800.39	1799.33
69.7397	7.03678	2005.29	1977.43					69.7397	0.147444	1926.17	1925.71					69.7397	-0.164604	1724.76	1725.18					69.7397	0.08063	1771.8	1771.45					69.7397	0.023425	1800.07	1799.98
69.791	6.64493	2002.68	1977.06					69.791	0.139461	1926.24	1925.8					69.791	0.297023	1725.63	1725.3					69.791	0.0338854	1772.22	1772.08					69.791	0.282411	1800.48	1799.39
69.8423	6.26694	2000.12	1976.04					69.8423	-0.00159	1925.9	1925.9					69.8423	0.685024	1726.48	1724.65					69.8423	0.099023	1772.99	1772.56					69.8423	0.766092	1802.06	1799.09
69.8935	6.03001	1998.37	1975					69.8935	-0.1226	1925.26	1925.64					69.8935	0.518012	1726.4	1724.2					69.8935	0.375937	1773.87	1772.24					69.8935	1.2535	1803.83	1798.97
69.9448	5.85418	1997.5	1974.22					69.9448	-0.01188	1924.76	1924.8					69.9448	0.136012	1725.31	1724.68					69.9448	0.724882	1775.13	1771.98					69.9448	1.57238	1804.34	1798.25
69.9961	5.51599	1995.57	1974.06					69.9961	0.146374	1924.12	1923.66					69.9961	-0.0466165	1723.79	1724.86					69.9961	0.927177	1776.53	1772.49					69.9961	1.26511	1803.06	1798.16
70.0473	5.26053	1993.11	1973.48					70.0473	0.099638	1923.28	1922.96					70.0473	0.13225	1723.1	1723.94					70.0473	0.976421	1777.17	1772.92					70.0473	0.82696	1801.34	1798.13
70.0986	5.16616	1991.77	1972.06					70.0986	0.006687	1922.96	1922.94					70.0986	0.563573	1723.4	1722.66					70.0986	1.00178	1777.52	1773.16					70.0986	0.518612	1800.51	1798.5
70.1498	5.13059	1991.94	1971.11					70.1498	0.076805	1923.28	1923.03					70.1498	0.724305	1722.95	1721.53					70.1498	1.12734	1777.58	1772.67					70.1498	0.371117	1800.83	1799.39
70.2011	5.3238	1993.33	1971.42					70.2011	0.02501	1923.25	1923.17					70.2011	0.0734502	1721.41	1720.55					70.2011	1.34485	1777.82	1771.98					70.2011	0.273215	1801.04	1799.98
70.2524	5.3866	1993.45	1972.03					70.2524	-0.23431	1923.02	1923.76					70.2524	-0.726559	1721.02	1721.17					70.2524	1.5515	1778.96	1772.21					70.2524	0.198863	1801.19	1800.42
70.3036	5.26274	1992.8	1971.9					70.3036	-0.09919	1923.87	1924.18					70.3036	-0.702129	1721.71	1723.43					70.3036	1.62514	1779.82	1772.75					70.3036	0.486282	1801.64	1799.75
70.3549	5.4179	1993.44	1971.75					70.3549	0.342953	1925.01	1923.93					70.3549	-0.276741	1722.1	1724.04					70.3549	1.57402	1780.02	1773.17					70.3549	0.729978	1801.32	1798.49
70.4062	5.47675	1993.69	1971.76					70.4062	0.381879	1925.17	1923.97					70.4062	-0.0156281	1722.83	1723.01					70.4062	1.56867	1779.66	1772.83					70.4062	0.767427	1801.08	1798.11
70.4574	5.07939	1992.17	1971.78					70.4574	0.30239	1925.19	1924.24					70.4574	-0.0152339	1723.34	1722.88					70.4574	1.59689	1779.07	1772.12					70.4574	0.788767	1801.1	1798.05
70.5087	4.4784	1989.43	1971.85					70.5087	0.447962	1925.4	1924					70.5087	-0.0385893	1723	1723.39					70.5087	1.60859	1778.63	1771.63					70.5087	0.714912	1800.88	1798.11
70.5599	4.10922	1987.29	1971.51					70.5599	0.348955	1924.97	1923.88					70.5599	0.203078	1722.2	1723.13					70.5599	1.37462	1777.42	1771.44					70.5599	0.459937	1800.68	1798.9
70.6112	4.15122	1986.67	1970.86					70.6112	0.063517	1924.65	1924.45					70.6112	0.248393	1721.29	1721.53					70.6112	1.05438	1775.96	1771.38					70.6112	-0.02162	1799.93	1800.01
70.6625	4.07825	1986.54	1970.08					70.6625	-0.28336	1924.67	1925.56					70.6625	-0.000423	1721.04	1720.47					70.6625	0.919077	1775.1	1771.11					70.6625	-0.19009	1799.51	1800.25
70.7137	3.76023	1986.13	1970.24					70.7137	-0.39718	1924.33	1925.58					70.7137	-0.464536	1720.86	1721.04					70.7137	0.694315	1774.37	1771.35					70.7137	-0.00155	1799.59	1799.59
70.765	3.58126	1985.85	1971.09					70.765	-0.09466	1924.15	1924.45					70.765	-0.743403	1721.22	1722.41					70.765	0.622572	1774.53	1771.82					70.765	0.185629	1799.29	1798.57
70.8162	3.57372	1986.17	1971.53					70.8162	0.102172	1924.22	1923.9					70.8162	-0.32088	1722.58	1723.69					70.8162	1.06759	1776.33	1771.69					70.8162	0.353337	1799.07	1797.7
70.8675	3.65023	1986.7	1971.88					70.8675	-0.12077	1923.54	1923.92					70.8675	0.233655	1723.85	1723.65					70.8675	1.49941	1778	1771.48					70.8675	0.235397	1799.17	1798.26
70.9188	3.77832	1987	1972.1					70.9188	-0.47394	1922.71	1924.2					70.9188	0.424489	1724.78	1723.08					70.9188	1.47512	1777.56	1771.15					70.9188	0.101504	1799.58	1799.18
70.97	3.79316	1986.69	1971.88					70.97	-0.58409	1922.83	1924.67					70.97	0.24883	1724.95	1723.37					70.97	1.17117	1776.07	1770.98					70.97	0.169876	1799.5	1798.84
71.0213	3.50393	1985.64	1971.52					71.0213	-0.45066	1923.37	1924.79					71.0213	-0.134687	1724.35	1724.12					71.0213	0.7927	1774.98	1771.53					71.0213	0.203007	1799.13	1798.35
71.0726	3.15566	1984.78	1971.63					71.0726	-0.16688	1924.09	1924.62					71.0726	-0.512468	1723.49	1724.79					71.0726	0.728921	1774.48	1771.31					71.0726	0.346243	1799.08	1797.74
71.1238	3.03158	1984.44	1972.15					71.1238	-0.03244	1924.75	1924.85					71.1238	-0.48708	1723.54	1725.19					71.1238	0.726431	1773.77	1770.62					71.1238	0.412019	1798.88	1797.28
71.1751	3.02336	1984.19	1972.31					71.1751	-0.0392	1924.98	1925.11					71.1751	-0.166692	1724.44	1725.16					71.1751	0.418445	1772.42	1770.6					71.1751	0.30385	1798.8	1797.62
71.2263	3.14428	1984.36	1972.1					71.2263	0.33334	1925.95	1924.9					71.2263	-0.126729	1724.57	1724.99					71.2263	0.475247	1772.09	1770.03					71.2263	0.448158	1798.77	1797.04
71.2776	3.21821	1984.55	1971.79					71.2776	0.873693	1927.68	1924.93					71.2776	-0.149958	1724.45	1724.99					71.2776	1.07073	1774.27	1769.62					71.2776	0.435243	1797.84	1796.16
71.3289	3.05758	1984.2	1971.68					71.3289	0.823433	1927.85	1925.26					71.3289	-0.196577	1724.55	1724.95					71.3289	1.43456	1776.58	1770.35					71.3289	0.223757	1797.4	1796.54
71.3801	2.98059	1983.92	1971.97					71.3801	0.616267	1927.27	1925.33					71.3801	-0.323509	1724.31	1725.2					71.3801	1.34629	1776.25	1770.39					71.3801	0.201069	1798.1	1797.32
71.4314	2.91787	1983.71	1971.99					71.4314	0.710279	1927.69	1925.45					71.4314	-0.304186	1724.24	1725.38					71.4314	0.972438	1774.49	1770.26					71.4314	0.097122	1798.34	1797.97
71.4826	2.71556	1983.11	1972.03					71.4826	0.692362	1927.77	1925.59					71.4826	-0.38312	1724.36	1725.25					71.4826	0.273924	1772.81	1771.62					71.4826	0.101972	1798.24	1797.85
71.5339	2.52828	1982.56	1972.25					71.5339	0.59119	1927.32	1925.46					71.5339	-0.408631	1724.16	1725.63					71.5339	-0.0658891	1772.36	1772.64					71.5339	0.206597	1798.16	1797.36
71.5852	2.66027	1983.31	1972.44					71.5852	0.418006	1926.74	1925.42					71.5852	-0.161964	1723.68	1725.52					71.5852	0.0452288	1772.89	1772.69					71.5852	0.055304	1797.9	1797.69
71.6364	2.83502	1983.6	1972.66					71.6364	-0.01821	1925.48	1925.53					71.6364	0.126661	1723.38	1724.22					71.6364	0.0983439	1773.09	1772.66					71.6364	-0.12764	1797.99	1798.48
71.6877	2.52969	1982	1972.26					71.6877	-0.28035	1924.51	1925.39					71.6877	0.225951	1723.48	1722.96					71.6877	0.149095	1772.67	1772.02					71.6877	-0.16103	1797.98	1798.6
71.739	2.21674	1981.41	1971.88					71.739	-0.17964	1924.58	1925.15					71.739	0.0356928	1723.77	1722.73					71.739	0.128793	1772.26	1771.7					71.739	-0.21756	1797.52	1798.37
71.7902	2.25068	1982.39	1972.54					71.7902	-0.29396	1924.59	1925.51					71.7902	0.141925	1724.2	1723.66					71.7902	0.0978746	1772.53	1772.1					71.7902	-0.14237	1798.16	1798.71
71.8415	2.55658	1983.36	1973.38					71.8415	-0.49213	1924.2	1925.76					71.8415	0.314566	1724.11	1723.73					71.8415	0.110725	1772.61	1772.12					71.8415	0.027868	1799.12	1799.01
71.8927	2.80394	1983.52	1973.12					71.8927	-0.50256	1924.09	1925.67					71.8927	0.0210865	1723.69	1723.06					71.8927	0.122638	1772.48	1771.94					71.8927	-0.03901	1799.24	1799.39
71.944	2.7005	1983.09	1972.29					71.944	-0.41471	1924.4	1925.71					71.944	-0.0106882	1724.68	1723.62					71.944	0.112483	1772.42	1771.93					71.944	-0.18137	1798.58	1799.28
71.9953	2.50922	1982.7	1972.29					71.9953	-0.17108	1924.87	1925.41					71.9953	0.421879	1726.2	1724.71					71.9953	0.111773	1772.54	1772.05					71.9953	-0.36024	1797.27	1798.67
72.0465	2.40381	1982.41	1972.66					72.0465	-0.141	1925.06	1925.5					72.0465	0.705314	1726	1724.8					72.0465	0.110262	1772.47	1771.99					72.0465	-0.48575	1797.08	1798.96
72.0978	2.32192	1982.06	1972.79					72.0978	-0.22179	1924.95	1925.65					72.0978	0.474314	1724.69	1723.66					72.0978	0.0039407	1771.75	1771.73					72.0978	-0.34221	1797.45	1798.78
72.1491	2.17869	1981.04	1972.76					72.1491	-0.04484	1924.76	1924.9					72.1491	-0.0353274	1723.8	1723.11					72.1491	-0.0270104	1771.26	1771.38					72.1491	-0.33905	1796.48	1797.79
72.2003	1.94267	1979.75	1972.32					72.2003	0.221118	1924.82	1924.12					72.2003	-0.191554	1723.66	1723.92					72.2003	0.014166	1771	1770.94					72.2003	-0.41952	1795.53	1797.16
72.2516	1.70177	1978.45	1971.98					72.2516	0.268758	1924.46	1923.62					72.2516	0.135875	1724.41	1724.3					72.2516	-0.0942186	1770.8	1771.21					72.2516	-0.35747	1795.71	1797.1
72.3028	1.35868	1977.19	1971.64					72.3028	0.005438	1923.39	1923.37					72.3028	0.37777	1725.74	1723.96					72.3028	-0.0998093	1771.47	1771.9					72.3028	-0.46167	1795.76	1797.55
72.3541	1.05537	1976.79	1971.75					72.3541	-0.33296	1922.64	1923.69					72.3541	0.296029	1726.21	1724.49					72.3541	0.142891	1772.9	1772.28					72.3541	-0.47471	1795.84	1797.68
72.4054	1.15068	1977.59	1972.57					72.4054	-0.56836	1922.26	1924.05					72.4054	-0.0186328	1725.21	1725.23					72.4054	0.313854	1773.79	1772.43					72.4054	-0.27168	1796.47	1797.53
72.4566	1.50435	1978.47	1972.98					72.4566	-0.67887	1922.42	1924.56					72.4566	-0.102406	1724.48	1725.27					72.4566	0.270966	1773.96	1772.78					72.4566	-0.10001	1797.31	1797.7
72.5079	1.6164	1978.33	1972.45					72.5079	-0.70669	1923.35	1925.58					72.5079	0.0975345	1724.54	1724.82					72.5079	0.122779	1774.05	1773.52					72.5079	-0.25112	1797.51	1798.48
72.5591	1.37057	1977.6	1971.86					72.5591	-0.50624	1924.09	1925.68					72.5591	-0.0855602	1723.86	1724.21					72.5591	0.0296608	1774.05	1773.92					72.5591	-0.60403	1796.73	1799.07
72.6104	1.13474	1976.92	1972.11					72.6104	-0.27297	1924.23	1925.09					72.6104	-0.182115	1723.27	1724.14					72.6104	-0.0020494	1773.53	1773.54					72.6104	-0.63509	1796.15	1798.61
72.6617	0.961266	1976.31	1972.38					72.6617	-0.328	1923.98	1925.01					72.6617	0.139917	1723.83	1723.88					72.6617	-0.0836062	1772.54	1772.91					72.6617	-0.6851	1796.32	1798.98
72.7129	0.71511	1975.57	1972.47					72.7129	-0.46819	1923.24	1924.71					72.7129	0.269424	1724.51	1723.36					72.7129	-0.275732	1771.67	1772.87					72.7129	-0.77543	1796.97	1799.98
72.7642	0.681581	1975.51	1972.71					72.7642	-0.68607	1922.31	1924.47					72.7642	-0.0867246	1724.16	1723.61					72.7642	-0.251054	1771.67	1772.76					72.7642	-0.56828	1797.48	1799.68
72.8155	0.876416	1976.46	1972.78					72.8155	-0.809	1922.31	1924.85					72.8155	-0.485018	1723.53	1724.44					72.8155	0.00431052	1771.91	1771.89					72.8155	-0.40877	1797.33	1798.92
72.8667	0.869609	1976.72	1972.95					72.8667	-0.67354	1922.59	1924.71					72.8667	-0.485779	1723.65	1725.14					72.8667	0.0322111	1771.98	1771.84					72.8667	-0.46964	1797.13	1798.95
72.918	0.971587	1976.33	1973.24					72.918	-0.43944	1922.33	1923.71					72.918	-0.265888	1723.98	1725.26					72.918	-0.0311637	1772.07	1772.2					72.918	-0.48007	1797.3	1799.16
72.9692	1.08422	1976.13	1972.45					72.9692	-0.16974	1922.66	1923.2					72.9692	-0.17993	1724.55	1724.86					72.9692	-0.118364	1771.45	1771.96					72.9692	-0.36827	1797.01	1798.43
73.0205	1.08348	1976.18	1971.79					73.0205	-0.20583	1922.88	1923.53					73.0205	-0.463709	1724.85	1725.15					73.0205	-0.400205	1770.07	1771.81					73.0205	-0.38738	1796.36	1797.86
73.0718	1.39776	1977.04	1971.85					73.0718	-0.51195	1922.33	1923.94					73.0718	-0.607811	1724.57	1726.39					73.0718	-0.541035	1769.25	1771.6					73.0718	-0.4568	1796.48	1798.25
73.123	1.54167	1977.72	1971.45					73.123	-0.59029	1922.1	1923.96					73.123	-0.47755	1724.34	1726.6					73.123	-0.280545	1769.4	1770.62					73.123	-0.43752	1796.85	1798.55
73.1743	1.43869	1977.66	1971.55					73.1743	-0.58971	1922.19	1924.04					73.1743	-0.175607	1725.25	1725.93					73.1743	-0.0584618	1768.95	1769.21					73.1743	-0.59889	1796.5	1798.82
73.2256	1.41131	1977.55	1971.9					73.2256	-0.74679	1922.23	1924.58					73.2256	0.444732	1727.2	1725.83					73.2256	-0.281062	1767.95	1769.17					73.2256	-0.80805	1796.19	1799.32
73.2768	1.40804	1977.71	1971.91					73.2768	-0.85777	1922.04	1924.74					73.2768	0.763825	1728.07	1725.72					73.2768	-0.584572	1767.67	1770.21					73.2768	-0.62749	1797.22	1799.65
73.3281	1.67792	1978.3	1972.08					73.3281	-0.86233	1921.83	1924.54					73.3281	0.39841	1727.24	1725.53					73.3281	-0.420989	1768.06	1769.89					73.3281	-0.10655	1798.97	1799.39
73.3793	1.93491	1978.79	1971.58					73.3793	-0.79661	1922.22	1924.72					73.3793	-0.198052	1725.94	1725.91					73.3793	-0.139308	1768.01	1768.61					73.3793	0.320981	1799.41	1798.16
73.4306	1.89978	1978.98	1971.06					73.4306	-0.69087	1922.78	1924.95					73.4306	-0.383986	1725.34	1726.6					73.4306	-0.310472	1767	1768.35					73.4306	0.048299	1798.47	1798.29
73.4819	1.89934	1978.82	1971.38					73.4819	-0.55143	1923.11	1924.85					73.4819	-0.472784	1725.06	1726.62					73.4819	-0.547843	1766.69	1769.07					73.4819	-0.3245	1798.17	1799.43
73.5331	1.97992	1978.96	1971.22					73.5331	-0.57138	1923.18	1924.97					73.5331	-0.880004	1724.3	1726.64					73.5331	-0.522845	1768.02	1770.29					73.5331	-0.21466	1798.12	1798.95
73.5844	2.06226	1979.47	1971.05					73.5844	-0.73638	1922.95	1925.27					73.5844	-0.972809	1723.26	1727.23					73.5844	-0.394265	1770.04	1771.76					73.5844	-0.18573	1797.86	1798.58
73.6356	1.76578	1978.31	1971.22					73.6356	-0.69124	1922.53	1924.7					73.6356	-0.542914	1723.23	1726.49					73.6356	-0.23027	1771.54	1772.54					73.6356	-0.22243	1798.08	1798.94
73.6869	1.35819	1976.8	1971.25					73.6869	-0.69993	1922.17	1924.38					73.6869	-0.392702	1723.88	1725.04					73.6869	-0.128903	1772.14	1772.7					73.6869	-0.16061	1798.38	1799
73.7382	1.45156	1976.51	1971.36					73.7382	-0.78786	1922.61	1925.09					73.7382	-0.733928	1723.35	1725.18					73.7382	-0.0258508	1772.46	1772.57					73.7382	-0.12791	1798.46	1798.96
73.7894	1.6468	1975.81	1970.7					73.7894	-0.51575	1923.46	1925.08					73.7894	-0.723408	1723.07	1725.79					73.7894	0.111814	1772.46	1771.98					73.7894	-0.19669	1798.29	1799.05
73.8407	1.72943	1975.27	1969.23					73.8407	-0.49999	1923.31	1924.88					73.8407	-0.375534	1723.97	1725.47					73.8407	0.0723227	1772.22	1771.91					73.8407	-0.31552	1798.27	1799.49
73.892	1.73417	1975.18	1968.36					73.892	-1.0198	1922.29	1925.5					73.892	0.0794869	1725.32	1725.22					73.892	-0.140818	1771.88	1772.5					73.892	-0.22354	1798.48	1799.36
73.9432	1.49748	1974.72	1968.26					73.9432	-1.119	1921.89	1925.41					73.9432	0.622856	1726.26	1725.05					73.9432	-0.332155	1771.22	1772.66					73.9432	0.221838	1798.64	1797.78
73.9945	1.66078	1975.43	1968.74					73.9945	-0.68545	1922.39	1924.55					73.9945	0.749834	1726.05	1724.19					73.9945	-0.392809	1770.74	1772.45					73.9945	0.410575	1798.48	1796.9
74.0457	2.157	1976.23	1968.8					74.0457	-0.51898	1922.47	1924.1					74.0457	0.474576	1725.72	1723.56					74.0457	-0.30792	1770.67	1772.01					74.0457	0.468636	1798.25	1796.44
74.097	2.03236	1974.24	1967.62					74.097	-0.61023	1922.4	1924.32					74.097	0.0439807	1725.1	1724.15					74.097	-0.219708	1770.71	1771.67					74.097	0.70903	1798.25	1795.51
74.1483	1.49358	1971.47	1966.13					74.1483	-0.51921	1922.96	1924.6					74.1483	-0.074699	1724.67	1724.96					74.1483	-0.333814	1770.2	1771.65					74.1483	0.600487	1798.14	1795.82
74.1995	1.17261	1970.91	1965.52					74.1995	-0.50879	1923.04	1924.64					74.1995	0.293479	1725.6	1724.92					74.1995	-0.596299	1768.75	1771.35					74.1995	0.511569	1798.78	1796.8
74.2508	1.32511	1971.3	1966.23					74.2508	-0.5361	1923.02	1924.7					74.2508	0.581018	1726.41	1724.62					74.2508	-0.727587	1767.57	1770.73					74.2508	0.553184	1800.23	1798.09
74.3021	1.53107	1971.39	1966.01					74.3021	-0.46435	1923.13	1924.59					74.3021	0.261895	1725.56	1724.48					74.3021	-0.611974	1767.07	1769.73					74.3021	0.496296	1801.22	1799.29
74.3533	1.39991	1971.66	1965.28					74.3533	-0.60918	1922.45	1924.37					74.3533	-0.258535	1724.41	1724.69					74.3533	-0.557843	1766.01	1768.43					74.3533	0.646575	1801.96	1799.45
74.4046	1.14185	1971.87	1966.07					74.4046	-0.72877	1921.66	1923.95					74.4046	-0.253505	1724.64	1725.27					74.4046	-0.742906	1764.51	1767.74					74.4046	1.15106	1803.56	1799.1
74.4558	1.0782	1972.06	1967.31					74.4558	-0.72861	1921.45	1923.74					74.4558	-0.103968	1725.13	1725.48					74.4558	-0.763326	1764.03	1767.34					74.4558	1.89417	1806.68	1799.34
74.5071	1.26463	1972.48	1967.76					74.5071	-0.88795	1921.75	1924.54					74.5071	-0.0943483	1725.01	1725.47					74.5071	-0.69876	1764.45	1767.48					74.5071	2.57137	1810.48	1800.5
74.5584	1.43268	1973.04	1967.43					74.5584	-1.07606	1921.66	1925.05					74.5584	-0.157456	1724.91	1725.32					74.5584	-0.699925	1765.48	1768.52					74.5584	3.11917	1813.12	1801.02
74.6096	1.27658	1973.13	1967.32					74.6096	-1.13728	1920.96	1924.53					74.6096	-0.124743	1724.93	1725.43					74.6096	-0.501309	1767.04	1769.21					74.6096	3.47983	1814.01	1800.51
74.6609	1.02752	1972.73	1968.03					74.6609	-0.95229	1921.11	1924.1					74.6609	0.081022	1724.6	1725.34					74.6609	-0.37625	1767.84	1769.47					74.6609	3.84124	1814.92	1800.02
74.7121	1.12641	1972.64	1968.63					74.7121	-0.47289	1922.33	1923.82					74.7121	-0.172117	1723.9	1724.33					74.7121	-0.500878	1767.94	1770.11					74.7121	4.14765	1816.42	1800.33
74.7634	1.06613	1972.16	1968.14					74.7634	-0.35687	1922.54	1923.66					74.7634	-0.642956	1723.33	1724.48					74.7634	-0.795556	1767.29	1770.74					74.7634	3.89584	1816.2	1801.08
74.8147	0.58741	1971.31	1967.91					74.8147	-0.65198	1921.84	1923.89					74.8147	-0.299752	1724.49	1725.47					74.8147	-1.06225	1765.78	1770.4					74.8147	3.13831	1813.52	1801.34
74.8659	0.307794	1970.86	1968.96					74.8659	-0.66928	1922.05	1924.15					74.8659	0.630889	1727.39	1725.48					74.8659	-1.04169	1765.32	1769.85					74.8659	2.1572	1810.31	1801.93
74.9172	0.4754	1971.09	1969.63					74.9172	-0.67423	1922.27	1924.39					74.9172	1.21931	1729.25	1725.3					74.9172	-0.925918	1766.46	1770.48					74.9172	1.53725	1808.28	1802.31
74.9685	0.762749	1972.28	1969.19					74.9685	-0.78217	1922.03	1924.49					74.9685	1.10376	1728.73	1725.2					74.9685	-0.924516	1767.74	1771.76					74.9685	1.3942	1807.6	1802.18
75.0197	0.863688	1972.75	1969.23					75.0197	-0.73364	1921.81	1924.11					75.0197	0.380063	1726.86	1725.07					75.0197	-0.994824	1768.37	1772.7					75.0197	1.31155	1807.26	1802.16
75.071	0.648405	1971.33	1969.29					75.071	-0.79535	1921.46	1923.96					75.071	-0.254003	1725.31	1725.6					75.071	-0.909274	1769.03	1772.99					75.071	1.37519	1806.67	1801.33
75.1222	0.396357	1970.34	1968.73					75.1222	-1.05359	1921.06	1924.37					75.1222	-0.338861	1725.01	1726.15					75.1222	-0.61313	1770.15	1772.82					75.1222	1.35049	1806.07	1800.83
75.1735	0.401426	1970.54	1968.76					75.1735	-1.28143	1920.53	1924.56					75.1735	-0.185702	1725.67	1726.13					75.1735	-0.246895	1771.56	1772.64					75.1735	1.12046	1805.44	1801.1
75.2248	0.391806	1970.66	1968.94					75.2248	-1.35008	1920.26	1924.51					75.2248	-0.152767	1725.89	1726.29					75.2248	-0.0419799	1772.64	1772.82					75.2248	1.17792	1804.41	1799.84
75.276	0.488811	1971.32	1969.09					75.276	-1.11018	1920.86	1924.35					75.276	-0.186836	1725.59	1726.4					75.276	-0.124934	1772.62	1773.16					75.276	1.3605	1803.05	1797.78
75.3273	0.678834	1971.95	1969.37					75.3273	-0.7488	1921.6	1923.95					75.3273	-0.0931751	1725.53	1726.21					75.3273	-0.204321	1772.24	1773.13					75.3273	1.04216	1801.9	1797.86
75.3785	0.618641	1971.21	1969.24					75.3785	-0.76837	1921.44	1923.86					75.3785	-0.228598	1724.72	1725.84					75.3785	-0.182072	1771.98	1772.78					75.3785	0.68919	1802.06	1799.39
75.4298	0.600866	1971	1968.74					75.4298	-0.87689	1921.08	1923.84					75.4298	-0.312044	1724.29	1725.48					75.4298	-0.164189	1771.91	1772.62					75.4298	0.804725	1803.14	1800.02
75.4811	0.61576	1971.93	1968.6					75.4811	-0.51034	1921.92	1923.53					75.4811	0.0959952	1725.35	1725.32					75.4811	-0.20738	1772.02	1772.92					75.4811	0.667185	1802.81	1800.22
75.5323	0.646557	1972.95	1969.47					75.5323	-0.12588	1923.34	1923.74					75.5323	0.428472	1726.14	1725.04					75.5323	-0.223212	1771.73	1772.7					75.5323	0.344698	1801.69	1800.35
75.5836	0.782444	1973.71	1970.37					75.5836	-0.39607	1923.09	1924.34					75.5836	0.388388	1726.29	1724.72					75.5836	-0.260866	1771.24	1772.37					75.5836	0.299606	1801.13	1799.96
75.6349	0.794956	1974	1970.58					75.6349	-0.95818	1922.06	1925.08					75.6349	0.396683	1726.79	1725					75.6349	-0.356881	1771.39	1772.95					75.6349	0.282147	1800.84	1799.75
75.6861	0.804688	1974.49	1970.83					75.6861	-1.01726	1922.39	1925.59					75.6861	0.519528	1727	1725.47					75.6861	-0.297065	1771.84	1773.13					75.6861	0.212288	1800.7	1799.88
75.7374	1.00613	1975.59	1971.27					75.7374	-0.93419	1922.6	1925.54					75.7374	0.288636	1726.13	1725.27					75.7374	-0.238894	1771.76	1772.8					75.7374	-0.0095	1799.6	1799.64
75.7886	1.32848	1976.9	1971.56					75.7886	-1.18416	1921.85	1925.58					75.7886	0.0329069	1725.7	1725.17					75.7886	-0.261385	1771.61	1772.75					75.7886	-0.19937	1797.82	1798.59
75.8399	1.46614	1977.29	1971.59					75.8399	-1.09522	1921.43	1924.88					75.8399	0.116492	1726.28	1725.59					75.8399	-0.283278	1771.77	1773					75.8399	-0.01583	1797.16	1797.22
75.8912	1.23951	1976.5	1971.43					75.8912	-0.65486	1921.5	1923.56					75.8912	0.409617	1727.27	1725.9					75.8912	-0.277853	1771.88	1773.09					75.8912	0.092641	1797.49	1797.13
75.9424	0.935548	1976	1971.54					75.9424	-0.47332	1921.62	1923.11					75.9424	0.840634	1728.62	1725.9					75.9424	-0.128096	1771.94	1772.5					75.9424	-0.07818	1797.85	1798.15
75.9937	0.862778	1976.35	1972.26					75.9937	-0.73526	1921.3	1923.61					75.9937	1.32578	1730.36	1725.83					75.9937	-0.0790449	1771.8	1772.14					75.9937	-0.15821	1797.73	1798.34
76.045	0.887191	1976.07	1972.89					76.045	-1.03962	1920.86	1924.13					76.045	1.98967	1732.12	1725.95					76.045	-0.14408	1771.56	1772.19					76.045	-0.1965	1797.25	1798.01
76.0962	0.978946	1975.56	1972.52					76.0962	-0.99174	1920.99	1924.11					76.0962	2.47389	1732.49	1725.51					76.0962	-0.0353556	1771.08	1771.24					76.0962	-0.29696	1796.85	1797.99
76.1475	1.10935	1975.34	1971.65					76.1475	-0.92637	1921.12	1924.03					76.1475	2.31515	1731.17	1724.28					76.1475	0.0896709	1770.37	1769.98					76.1475	-0.27215	1796.51	1797.56
76.1987	1.16401	1974.75	1970.9					76.1987	-0.95826	1920.79	1923.8					76.1987	1.7231	1729.42	1723.49					76.1987	-0.0224326	1770.21	1770.31					76.1987	0.02688	1796.85	1796.74
76.25	1.06137	1974.68	1970.1					76.25	-0.99367	1920.54	1923.67					76.25	1.1383	1727.82	1723.7					76.25	-0.181785	1770.12	1770.91					76.25	0.21142	1797.7	1796.88
76.3013	0.856129	1974.94	1970.44					76.3013	-0.99285	1920.81	1923.94					76.3013	1.10293	1727.03	1724.04					76.3013	-0.0955938	1770.23	1770.64					76.3013	-0.10502	1797.72	1798.13
76.3525	0.949829	1975.1	1971.51					76.3525	-0.76537	1921.4	1923.81					76.3525	1.28352	1726.47	1723.37					76.3525	-0.059858	1770.88	1771.14					76.3525	-0.38145	1796.43	1797.9
76.4038	1.04226	1974.32	1971.3					76.4038	-0.38508	1921.46	1922.67					76.4038	0.913521	1724.59	1722.21					76.4038	-0.149639	1771.21	1771.86					76.4038	-0.32303	1794.98	1796.23
76.455	0.878859	1972.76	1970.15					76.455	-0.25055	1920.88	1921.66					76.455	0.325256	1723.13	1721.56					76.455	-0.100102	1770.54	1770.97					76.455	-0.33979	1794.72	1796.04
76.5063	0.937191	1972.99	1969.24					76.5063	-0.45821	1921.2	1922.64					76.5063	-0.0122127	1723.38	1722.05					76.5063	0.00559422	1769.47	1769.45					76.5063	-0.43656	1795.07	1796.76
76.5576	1.14876	1974.17	1969.25					76.5576	-0.80821	1921.87	1924.41					76.5576	-0.0469961	1723.95	1723.42					76.5576	0.0894064	1768.99	1768.61					76.5576	-0.39255	1795.92	1797.44
76.6088	1.02096	1973.74	1969.58					76.6088	-0.96579	1921.76	1924.8					76.6088	0.0405168	1724.56	1724.11					76.6088	-0.0665633	1768.64	1768.93					76.6088	-0.34348	1797.03	1798.36
76.6601	0.965733	1973.39	1969.66					76.6601	-0.86385	1921.61	1924.33					76.6601	0.130744	1725	1724.42					76.6601	-0.291832	1769.75	1771.02					76.6601	-0.60309	1797.13	1799.47
76.7114	1.23107	1973.8	1969.53					76.7114	-0.79519	1921.63	1924.13					76.7114	0.351905	1725.31	1724.57					76.7114	-0.10098	1772.27	1772.71					76.7114	-0.82847	1797.19	1800.4
76.7626	1.26577	1973.3	1968.88					76.7626	-0.53392	1922.07	1923.74					76.7626	0.75692	1726.44	1724.14					76.7626	0.066444	1772.93	1772.64					76.7626	-0.7127	1797.59	1800.36
76.8139	0.947128	1972.14	1968.25					76.8139	-0.18637	1922.68	1923.27					76.8139	1.23309	1727.96	1723.93					76.8139	-0.179838	1771.86	1772.64					76.8139	-0.58445	1797.34	1799.6
76.8651	0.58566	1971.27	1968.36					76.8651	-0.16534	1922.92	1923.44					76.8651	1.33615	1728.28	1723.86					76.8651	-0.352715	1771.19	1772.73					76.8651	-0.38632	1797	1798.49
76.9164	0.600715	1971.77	1968.93					76.9164	-0.33584	1922.76	1923.82					76.9164	1.08602	1727.48	1723.85					76.9164	-0.208378	1771.36	1772.27					76.9164	-0.18983	1797.56	1798.3
76.9677	0.644439	1972.4	1969.37					76.9677	-0.34316	1922.61	1923.68					76.9677	0.745524	1726.52	1723.88					76.9677	-0.0619424	1771.39	1771.66					76.9677	-0.21308	1798.39	1799.21
77.0189	0.538853	1972.15	1969.83					77.0189	-0.17211	1922.51	1923.05					77.0189	0.382774	1725.6	1724.04					77.0189	-0.0395185	1771.16	1771.33					77.0189	-0.39441	1797.95	1799.47
77.0702	0.763927	1972.8	1970					77.0702	-0.43233	1921.74	1923.1					77.0702	0.354469	1725.76	1724.33					77.0702	-0.0025343	1771.55	1771.56					77.0702	-0.69737	1796.38	1799.08
77.1215	0.830181	1974.59	1969.74					77.1215	-0.92292	1921.23	1924.13					77.1215	0.498564	1726.66	1724.58					77.1215	0.0529516	1771.88	1771.65					77.1215	-0.86069	1795.65	1798.98
77.1727	0.565269	1976.43	1971.27					77.1727	-0.98292	1921.71	1924.8					77.1727	0.439664	1726.06	1725					77.1727	-0.0778924	1770.52	1770.86					77.1727	-0.81646	1796.03	1799.2
77.224	0.430695	1977.41	1974.17					77.224	-0.7144	1922.34	1924.58					77.224	0.167836	1724.62	1724.6					77.224	-0.312949	1768.18	1769.54					77.224	-0.73705	1796.39	1799.24
77.2752	0.462399	1977.88	1975.69					77.2752	-0.51436	1922.76	1924.38					77.2752	-0.152065	1723.78	1724.06					77.2752	-0.176828	1767.18	1767.94					77.2752	-0.65658	1797.07	1799.62
77.3265	0.656813	1978.46	1976.03					77.3265	-0.71456	1922.47	1924.71					77.3265	-0.300842	1723.41	1724.28					77.3265	0.0578873	1767.87	1767.62					77.3265	-0.48687	1797.89	1799.78
77.3778	0.800072	1978.73	1975.83					77.3778	-0.98456	1921.72	1924.81					77.3778	-0.481983	1723.64	1724.4					77.3778	-0.116981	1768.89	1769.4					77.3778	-0.20636	1797.66	1798.46
77.429	0.773152	1978.54	1975.52					77.429	-0.89214	1921.62	1924.42					77.429	-0.636456	1724.35	1725.24					77.429	-0.285537	1769.79	1771.04					77.429	-0.16258	1796.67	1797.3
77.4803	0.526988	1977.63	1975.44					77.4803	-0.55668	1922.59	1924.35					77.4803	-0.516357	1724.9	1726.47					77.4803	-0.13608	1770.96	1771.55					77.4803	-0.40813	1795.96	1797.54
77.5315	0.305835	1977.44	1975.52					77.5315	-0.42587	1923.1	1924.44					77.5315	-0.229612	1725.23	1726.62					77.5315	0.136084	1772.04	1771.45					77.5315	-0.46815	1795.65	1797.46
77.5828	0.434753	1978.2	1976.22					77.5828	-0.55877	1922.6	1924.36					77.5828	-0.0228945	1725.37	1725.99					77.5828	0.279028	1772.74	1771.52					77.5828	-0.06231	1795.43	1795.68
77.6341	0.544988	1977.8	1976.46					77.6341	-0.45242	1922.88	1924.31					77.6341	0.0990349	1725.82	1725.45					77.6341	0.271173	1772.79	1771.61					77.6341	0.163384	1794.63	1794
77.6853	0.299472	1976.9	1975.61					77.6853	-0.28874	1923.17	1924.08					77.6853	0.427154	1727.08	1725.49					77.6853	0.302762	1772.54	1771.22					77.6853	-0.18692	1794	1794.73
77.7366	0.012175	1976.65	1975.7					77.7366	-0.35971	1922.57	1923.7					77.7366	0.512153	1727.43	1725.66					77.7366	0.228718	1772.63	1771.63					77.7366	-0.39372	1794.75	1796.27
77.7879	0.079225	1977.17	1976.6					77.7879	-0.39245	1922.44	1923.67					77.7879	0.136223	1726.25	1725.72					77.7879	0.0743995	1772.74	1772.41					77.7879	-0.28297	1795.96	1797.06
77.8391	0.275098	1978.07	1976.85					77.8391	-0.34984	1923.08	1924.18					77.8391	-0.229459	1725.1	1725.8					77.8391	0.104666	1772.24	1771.79					77.8391	-0.00357	1796.53	1796.54
77.8904	0.356595	1978.61	1976.96					77.8904	-0.35199	1923.12	1924.23					77.8904	-0.371127	1724.72	1725.86					77.8904	-0.0699258	1770.82	1771.12					77.8904	0.379866	1795.84	1794.37
77.9416	0.513881	1979.1	1977.18					77.9416	-0.52503	1922.24	1923.89					77.9416	-0.225466	1724.53	1725.95					77.9416	-0.51024	1769.66	1771.88					77.9416	0.474481	1795.07	1793.23
77.9929	0.769391	1979.8	1977.04					77.9929	-0.53744	1922.02	1923.71					77.9929	-0.0216173	1724.25	1725.28					77.9929	-0.701886	1769.26	1772.31					77.9929	0.281075	1795.56	1794.47
78.0442	0.787932	1980.09	1976.71					78.0442	-0.43065	1922.04	1923.4					78.0442	-0.0584007	1723.99	1724.32					78.0442	-0.727657	1768.81	1771.97					78.0442	0.019868	1796.69	1796.62
78.0954	0.535478	1979.39	1976.93					78.0954	-0.57876	1921.63	1923.45					78.0954	-0.332551	1723.04	1724.18					78.0954	-0.793072	1768.25	1771.7					78.0954	-0.07298	1798.06	1798.34
78.1467	0.441881	1979.36	1977.24					78.1467	-0.51174	1922.07	1923.68					78.1467	-0.704944	1722.06	1724.14					78.1467	-0.797219	1767.75	1771.22					78.1467	0.245105	1799.11	1798.16
78.1979	0.561826	1980.44	1977.58					78.1979	-0.33743	1922.64	1923.7					78.1979	-0.772362	1721.96	1724.4					78.1979	-0.650102	1767.52	1770.35					78.1979	0.76769	1799.24	1796.27
78.2492	0.668227	1980.82	1978.18					78.2492	-0.67253	1922.19	1924.3					78.2492	-0.399776	1722.26	1724.52					78.2492	-0.531328	1767.05	1769.36					78.2492	1.0249	1798.6	1794.63
78.3005	0.769322	1980.31	1978.14					78.3005	-0.98477	1921.77	1924.87					78.3005	-0.164153	1722.55	1723.59					78.3005	-0.499082	1766.2	1768.37					78.3005	0.875311	1798.81	1795.43
78.3517	0.641177	1978.41	1977.22					78.3517	-0.62181	1922.41	1924.37					78.3517	-0.173787	1722.57	1723.1					78.3517	-0.385221	1765.79	1767.46					78.3517	0.977227	1801.01	1797.23
78.403	0.125952	1975.83	1975.84					78.403	-0.31752	1922.8	1923.8					78.403	-0.133366	1722.6	1723.15					78.403	-0.462596	1766.13	1768.13					78.403	1.61408	1803.28	1797.03
78.4543	-0.1676	1974.83	1975.32					78.4543	-0.64246	1922.07	1924.09					78.4543	-0.0733132	1723.35	1723.04					78.4543	-0.598627	1767.21	1769.81					78.4543	1.84107	1803.68	1796.55
78.5055	0.183295	1975.25	1975.51					78.5055	-0.86759	1921.88	1924.61					78.5055	-0.0447892	1724.3	1723.59					78.5055	-0.499809	1768.29	1770.47					78.5055	1.46679	1802.33	1796.65
78.5568	0.575688	1975.34	1974.52					78.5568	-0.68493	1922.54	1924.69					78.5568	-0.208772	1724.38	1724.45					78.5568	-0.451232	1768.87	1770.83					78.5568	0.933243	1801.07	1797.45
78.608	0.67613	1975.23	1973.04					78.608	-0.66931	1922.75	1924.86					78.608	-0.465302	1724.33	1725.08					78.608	-0.397454	1769.81	1771.54					78.608	0.537405	1801.42	1799.34
78.6593	0.936657	1976.25	1972.52					78.6593	-0.7906	1922.66	1925.15					78.6593	-0.364544	1725.04	1725.88					78.6593	-0.359637	1770.73	1772.3					78.6593	0.567976	1801.89	1799.69
78.7106	1.04124	1976.94	1972.51					78.7106	-0.8681	1922.3	1925.03					78.7106	0.0235732	1725.87	1726.26					78.7106	-0.298505	1771.05	1772.35					78.7106	0.545569	1801.08	1798.96
78.7618	0.64341	1976.12	1972.77					78.7618	-0.94372	1921.95	1924.92					78.7618	0.227713	1726.02	1725.79					78.7618	-0.142714	1771.24	1771.86					78.7618	0.512783	1800.34	1798.35
78.8131	0.329571	1975.74	1973.54					78.8131	-1.03332	1922.01	1925.26					78.8131	0.0534782	1725.58	1725.27					78.8131	-0.215864	1771.1	1772.04					78.8131	0.718471	1800.72	1797.94
78.8644	0.326699	1976.86	1974.42					78.8644	-1.04665	1921.98	1925.27					78.8644	-0.0737258	1725.11	1725.41					78.8644	-0.301249	1771.04	1772.35					78.8644	0.778753	1801.73	1798.71
78.9156	0.512264	1978.31	1975.55					78.9156	-0.76475	1922.57	1924.98					78.9156	0.043987	1725.03	1725.36					78.9156	-0.28563	1771.22	1772.46					78.9156	0.676784	1801.99	1799.37
78.9669	0.509915	1978.59	1976.25					78.9669	-0.47851	1923.79	1925.29					78.9669	0.34333	1726.05	1724.88					78.9669	-0.29708	1771.19	1772.48					78.9669	0.579726	1801.38	1799.13
79.0181	0.37404	1978.69	1976.55					79.0181	-0.45399	1924.28	1925.71					79.0181	0.801999	1727.51	1724.91					79.0181	-0.230267	1770.66	1771.66					79.0181	0.469128	1800.44	1798.63
79.0694	0.62823	1979.5	1977.19					79.0694	-0.45415	1923.99	1925.42					79.0694	0.776706	1727.22	1724.84					79.0694	-0.189852	1769.65	1770.48					79.0694	0.478057	1799.83	1797.97
79.1207	0.831507	1979.59	1976.98					79.1207	-0.21587	1923.76	1924.43					79.1207	0.260359	1725.53	1724.64					79.1207	-0.276792	1768.93	1770.13					79.1207	0.343223	1799.5	1798.17
79.1719	0.73438	1979.16	1976.26					79.1719	0.066278	1924.16	1923.96					79.1719	0.131961	1724.39	1724.66					79.1719	-0.39941	1768.67	1770.41					79.1719	0.090835	1798.91	1798.56
79.2232	0.728356	1978.8	1976.22					79.2232	-0.00166	1924.3	1924.3					79.2232	0.494313	1724.67	1723.95					79.2232	-0.353114	1768.71	1770.24					79.2232	0.119794	1798.24	1797.78
79.2744	0.792488	1978.19	1975.88					79.2744	-0.17835	1923.67	1924.23					79.2744	0.705038	1725.8	1723.03					79.2744	-0.274205	1768.72	1769.91					79.2744	0.013202	1797.3	1797.25
79.3257	0.660746	1977.77	1975.02					79.3257	-0.31048	1923.05	1924.03					79.3257	0.636695	1726.88	1723.46					79.3257	-0.314898	1768.69	1770.05					79.3257	-0.13744	1796.94	1797.48
79.377	0.332581	1977.17	1975.12					79.377	-0.60776	1922.51	1924.42					79.377	0.88257	1728.33	1724.77					79.377	-0.298964	1768.91	1770.21					79.377	0.052995	1797.23	1797.03
79.4282	0.103607	1976.33	1975.83					79.4282	-0.56732	1922.59	1924.38					79.4282	1.37224	1730.19	1725.39					79.4282	-0.275436	1768.91	1770.11					79.4282	0.253948	1796.95	1795.97
79.4795	0.174004	1976.28	1975.92					79.4795	-0.2802	1923	1923.88					79.4795	1.32979	1730.61	1725.63					79.4795	-0.340123	1768.88	1770.36					79.4795	0.243147	1796.54	1795.6
79.5308	0.149633	1976.62	1975.59					79.5308	-0.48386	1922.8	1924.32					79.5308	0.809159	1729.28	1726.19					79.5308	-0.472682	1769.29	1771.35					79.5308	0.284008	1796.46	1795.36
79.582	0.003416	1976.77	1976.03					79.582	-0.83209	1922.3	1924.92					79.582	0.28169	1727.7	1726.59					79.582	-0.496461	1770.11	1772.27					79.582	0.334682	1796.26	1794.97
79.6333	0.150015	1976.8	1976.76					79.6333	-0.74401	1922.13	1924.47					79.6333	0.0585185	1726.92	1726.76					79.6333	-0.235399	1771.3	1772.33					79.6333	0.225853	1795.55	1794.67
79.6845	0.439768	1976.78	1976.2					79.6845	-0.59981	1922.25	1924.14					79.6845	0.281813	1727.08	1726.72					79.6845	0.044318	1772.03	1771.83					79.6845	0.102771	1794.77	1794.38
79.7358	0.539323	1976.88	1975.02					79.7358	-0.7699	1922.18	1924.6					79.7358	0.38068	1726.79	1726.15					79.7358	0.196024	1772.28	1771.43					79.7358	0.068809	1795.39	1795.12
79.7871	0.275685	1976.58	1974.72					79.7871	-0.87747	1922.21	1924.97					79.7871	0.118691	1726.08	1725.53					79.7871	0.447857	1773.23	1771.29					79.7871	0.097357	1796.49	1796.11
79.8383	0.06713	1976.25	1975.47					79.8383	-0.76995	1922.46	1924.88					79.8383	0.00034022	1725.79	1725.69					79.8383	0.689974	1774.35	1771.35					79.8383	0.136134	1796.94	1796.41
79.8896	0.067112	1976.25	1975.98					79.8896	-0.62599	1922.64	1924.61					79.8896	0.262362	1725.13	1725.78					79.8896	0.552348	1774.13	1771.73					79.8896	0.418165	1797.87	1796.25
79.9409	0.13347	1976.28	1975.98					79.9409	-0.59394	1922.62	1924.49					79.9409	0.567864	1724.24	1724.26					79.9409	0.187089	1773.28	1772.46					79.9409	0.743086	1798.52	1795.65
79.9921	0.512703	1977.57	1975.75					79.9921	-0.63729	1922.38	1924.39					79.9921	0.637456	1723.49	1722.36					79.9921	-0.0403957	1772.58	1772.75					79.9921	0.594226	1798.35	1796.05
80.0434	1.42282	1981.24	1975.52					80.0434	-0.60441	1922.32	1924.22					80.0434	0.192688	1722.35	1721.37					80.0434	-0.0187273	1772.23	1772.31					80.0434	0.487239	1798.05	1796.16
80.0946	2.49324	1985.95	1975.54					80.0946	-0.64208	1922.46	1924.48					80.0946	-0.465481	1721.79	1721.71					80.0946	0.00579362	1771.93	1771.91					80.0946	0.598041	1797.1	1794.79
80.1459	2.80529	1987.96	1975.95					80.1459	-0.72055	1922.44	1924.7					80.1459	-0.426856	1722.6	1723.33					80.1459	-0.186534	1770.91	1771.73					80.1459	0.593583	1796.22	1793.93
80.1972	2.33624	1986.22	1976.71					80.1972	-0.66817	1922.46	1924.56					80.1972	-0.0789413	1723.4	1724.02					80.1972	-0.28958	1770.23	1771.49					80.1972	0.43698	1795.92	1794.23
80.2484	1.89489	1984	1976.85					80.2484	-0.55747	1922.63	1924.38					80.2484	0.155022	1724.1	1723.66					80.2484	-0.100284	1770.58	1771.02					80.2484	0.085523	1795.92	1795.59
80.2997	1.61724	1982.41	1976.4					80.2997	-0.45552	1922.64	1924.07					80.2997	0.331128	1724.88	1723.59					80.2997	0.00314081	1770.58	1770.56					80.2997	0.100141	1797	1796.61
80.3509	1.16293	1980.4	1975.93					80.3509	-0.46588	1922.54	1924					80.3509	0.497032	1725.6	1723.78					80.3509	-0.35418	1769.26	1770.8					80.3509	0.512946	1797.98	1795.99
80.4022	0.744743	1978.78	1975.74					80.4022	-0.44748	1922.94	1924.35					80.4022	0.691838	1726.1	1723.95					80.4022	-0.706973	1768.08	1771.15					80.4022	0.603452	1797.48	1795.15
80.4535	0.550894	1977.94	1975.8					80.4535	-0.34823	1923.32	1924.41					80.4535	0.393324	1725.67	1723.8					80.4535	-0.425013	1768.24	1770.09					80.4535	0.450073	1796.46	1794.72
80.5047	0.410229	1977.37	1975.73					80.5047	-0.43885	1922.83	1924.21					80.5047	0.00358782	1725.3	1724.37					80.5047	0.126014	1768.44	1767.89					80.5047	0.374286	1796.08	1794.63
80.556	0.280103	1977.13	1975.72					80.556	-0.43284	1922.58	1923.94					80.556	-0.0587907	1724.84	1725.29					80.556	0.188673	1767.62	1766.8					80.556	0.225897	1795.87	1795
80.6073	0.121573	1977.04	1976.01					80.6073	-0.27947	1922.81	1923.69					80.6073	0.00686878	1724.01	1725.04					80.6073	0.0970975	1767.58	1767.16					80.6073	0.211075	1795.5	1794.68
80.6585	0.032121	1976.9	1976.55					80.6585	-0.36942	1922.6	1923.76					80.6585	-0.0466561	1723.52	1723.99					80.6585	0.227497	1769.61	1768.62					80.6585	0.344397	1795.22	1793.89
80.7098	-0.09696	1976.33	1976.77					80.7098	-0.45119	1922.27	1923.69					80.7098	-0.122611	1723.55	1723.68					80.7098	0.218751	1771.92	1770.97					80.7098	0.276764	1794.51	1793.44
80.761	-0.36812	1975.52	1976.72					80.761	-0.46073	1922.24	1923.69					80.761	0.176377	1724.35	1723.95					80.761	0.158872	1772.98	1772.29					80.761	0.143647	1793.84	1793.29
80.8123	-0.41794	1975.17	1977					80.8123	-0.51515	1922.55	1924.17					80.8123	0.197262	1724.84	1723.77					80.8123	0.157546	1773.46	1772.77					80.8123	-0.01307	1793.62	1793.67
80.8636	-0.28497	1974.86	1976.85					80.8636	-0.52522	1922.64	1924.29					80.8636	-0.0885809	1724.43	1724.19					80.8636	-0.0026452	1773.22	1773.23					80.8636	-0.04198	1793.6	1793.77
80.9148	-0.16411	1974.98	1976.01					80.9148	-0.52864	1922.37	1924.03					80.9148	-0.131702	1724.45	1724.73					80.9148	-0.221921	1772.21	1773.17					80.9148	-0.04647	1793.57	1793.75
80.9661	-0.24364	1974.79	1975.64					80.9661	-0.56293	1922.39	1924.16					80.9661	-0.0234817	1725.2	1724.89					80.9661	-0.175637	1771.95	1772.71					80.9661	-0.32345	1793.67	1794.92
81.0174	-0.27906	1974.22	1975.76					81.0174	-0.60471	1922.33	1924.23					81.0174	0.145576	1725.56	1725.27					81.0174	-0.0595794	1772.16	1772.42					81.0174	-0.29686	1794.72	1795.87
81.0686	0.059333	1974.4	1975.34					81.0686	-0.56935	1922.42	1924.21					81.0686	0.253476	1725.57	1725.07					81.0686	-0.180589	1771.83	1772.61					81.0686	-0.12188	1795.61	1796.08
81.1199	0.321842	1973.54	1974.17					81.1199	-0.62467	1922.75	1924.71					81.1199	0.205303	1725.61	1724.73					81.1199	-0.239278	1771.26	1772.3					81.1199	-0.2005	1795.56	1796.34
81.1711	0.408737	1971.45	1972.25					81.1711	-0.59505	1923.31	1925.18					81.1711	0.158033	1725.46	1724.93					81.1711	-0.103541	1770.78	1771.23					81.1711	-0.10727	1795.91	1796.33
81.2224	0.260645	1968.68	1969.82					81.2224	-0.42145	1923.81	1925.14					81.2224	0.108064	1725.3	1724.93					81.2224	-0.0072799	1769.91	1769.94					81.2224	-0.06636	1796.73	1796.99
81.2737	-0.2171	1966.83	1967.64					81.2737	-0.28987	1923.45	1924.37					81.2737	-0.100135	1725.29	1724.94					81.2737	0.0214431	1768.44	1768.34					81.2737	-0.36772	1796.85	1798.28
81.3249	-0.49842	1968.48	1967.7					81.3249	-0.16551	1923.44	1923.96					81.3249	-0.218049	1725.25	1725.62					81.3249	-0.0563498	1767.13	1767.37					81.3249	-0.47171	1796.96	1798.79
81.3762	-0.14057	1971.99	1970.48					81.3762	-0.25391	1923.65	1924.44					81.3762	0.036377	1725.4	1725.98					81.3762	-0.286486	1766.41	1767.66					81.3762	-0.31786	1797.8	1799.03
81.4274	0.229212	1973.37	1972.55					81.4274	-0.40692	1923.43	1924.71					81.4274	0.232236	1725.57	1725.28					81.4274	-0.439266	1766.34	1768.24					81.4274	-0.35369	1798.31	1799.68
81.4787	0.258238	1972.73	1972.45					81.4787	-0.43895	1923.42	1924.81					81.4787	-0.0238396	1725.19	1724.8					81.4787	-0.493671	1766.25	1768.39					81.4787	-0.3024	1798.44	1799.62
81.53	0.527479	1973.37	1971.7					81.53	-0.41918	1923.43	1924.75					81.53	-0.151089	1724.7	1725.27					81.53	-0.69692	1765.33	1768.36					81.53	-0.0896	1798.43	1798.78
81.5812	0.782145	1975.14	1971.26					81.5812	-0.33791	1923.3	1924.36					81.5812	-0.0349211	1724.05	1725.2					81.5812	-0.805545	1764.75	1768.25					81.5812	-0.12081	1798.31	1798.78
81.6325	0.656616	1976.78	1972.01					81.6325	-0.38175	1922.87	1924.07					81.6325	0.0988964	1723.86	1724.17					81.6325	-0.550924	1765.04	1767.43					81.6325	-0.28447	1798.44	1799.54
81.6838	0.420884	1977.55	1974.14					81.6838	-0.64038	1921.93	1923.95					81.6838	0.0773913	1724.33	1723.54					81.6838	-0.360711	1765	1766.56					81.6838	-0.32101	1798.43	1799.68
81.735	0.292957	1977.61	1975.87					81.735	-0.75701	1921.71	1924.09					81.735	-0.0738244	1724.24	1724.07					81.735	-0.528015	1764.61	1766.9					81.735	0.012636	1798.4	1798.35
81.7863	0.345355	1978.04	1976.43					81.7863	-0.5173	1923.23	1924.86					81.7863	0.136473	1724.01	1724.49					81.7863	-0.627404	1764.46	1767.18					81.7863	0.414204	1797.63	1796.03
81.8375	0.475216	1978.33	1976.66					81.8375	-0.08703	1925.12	1925.4					81.8375	0.15679	1723.34	1723.55					81.8375	-0.445284	1764.48	1766.42					81.8375	0.384918	1796.33	1794.84
81.8888	0.526611	1977.95	1976.43					81.8888	0.353203	1926.12	1925.01					81.8888	-0.0833051	1722.64	1722.82					81.8888	-0.322089	1764.59	1765.99					81.8888	0.270573	1797.08	1796.03
81.9401	0.304625	1977.08	1975.84					81.9401	0.474838	1925.85	1924.35					81.9401	-0.0062641	1722.32	1722.91					81.9401	-0.410288	1764.24	1766.02					81.9401	0.207669	1798.96	1798.16
81.9913	-0.08003	1976.21	1975.86					81.9913	0.193108	1924.72	1924.11					81.9913	-0.0149724	1721.71	1722.34					81.9913	-0.568551	1763.63	1766.09					81.9913	0.183727	1799.72	1799.01
82.0426	-0.24507	1976.22	1976.53					82.0426	-0.01027	1924.38	1924.41					82.0426	-0.204828	1722.09	1721.76					82.0426	-0.61469	1764.19	1766.85					82.0426	0.20862	1799.68	1798.88
82.0938	-0.10552	1977.56	1977.2					82.0938	-0.0993	1924.49	1924.81					82.0938	-0.0237276	1723.67	1722.77					82.0938	-0.549037	1766.03	1768.42					82.0938	0.183523	1799.47	1798.76
82.1451	0.324881	1979.46	1977.98					82.1451	-0.23548	1924.1	1924.84					82.1451	0.365589	1724.78	1723.75					82.1451	-0.469011	1767.83	1769.86					82.1451	0.37417	1800.04	1798.59
82.1964	0.823523	1980.85	1978.16					82.1964	-0.12052	1924.22	1924.6					82.1964	0.221649	1724.68	1723.56					82.1964	-0.519205	1768.58	1770.84					82.1964	0.558398	1800.91	1798.74
82.2476	1.04003	1981.71	1977.55					82.2476	0.000452	1924.86	1924.85					82.2476	-0.046446	1724.46	1723.94					82.2476	-0.593317	1768.94	1771.52					82.2476	0.382545	1800.9	1799.42
82.2989	0.95231	1981.7	1977.54					82.2989	0.074805	1924.81	1924.57					82.2989	0.125565	1725.23	1724.61					82.2989	-0.586324	1769.48	1772.03					82.2989	0.272259	1800.7	1799.65
82.3502	0.731956	1980.63	1977.88					82.3502	0.014471	1923.73	1923.68					82.3502	0.117139	1725.72	1724.82					82.3502	-0.562095	1769.99	1772.44					82.3502	0.474552	1800.65	1798.81
82.4014	0.730566	1980.32	1977.7					82.4014	-0.4388	1922.81	1924.19					82.4014	-0.101227	1725.07	1725.33					82.4014	-0.448473	1770.52	1772.47					82.4014	0.641949	1800.58	1798.09
82.4527	0.925069	1980.88	1977.39					82.4527	-0.54712	1923.18	1924.9					82.4527	0.023397	1725.18	1725.4					82.4527	-0.394219	1771.26	1772.97					82.4527	0.541821	1800.13	1798.03
82.5039	0.933086	1980.47	1977.16					82.5039	-0.25638	1924.07	1924.87					82.5039	0.186694	1725.65	1725.1					82.5039	-0.459116	1771.69	1773.68					82.5039	0.282336	1799.08	1797.99
82.5552	0.825127	1979.3	1976.73					82.5552	0.010136	1924.88	1924.85					82.5552	0.309089	1725.71	1725.03					82.5552	-0.456293	1771.22	1773.2					82.5552	0.118598	1798.72	1798.26
82.6065	0.683389	1978.33	1975.99					82.6065	0.131176	1925.33	1924.91					82.6065	0.550394	1726.15	1724.68					82.6065	-0.341923	1770.77	1772.26					82.6065	0.048099	1799.16	1798.97
82.6577	0.66237	1978.29	1975.59					82.6577	0.117291	1925.23	1924.86					82.6577	0.47318	1726.13	1724.32					82.6577	-0.255223	1770.82	1771.93					82.6577	0.114363	1799.13	1798.69
82.709	1.10542	1980.48	1975.63					82.709	0.026262	1924.9	1924.82					82.709	0.0978456	1725.85	1724.56					82.709	-0.113242	1771.45	1771.94					82.709	0.158877	1798.44	1797.83
82.7603	1.99439	1983.95	1976.05					82.7603	-0.2469	1924.27	1925.05					82.7603	-0.104632	1725.88	1725.52					82.7603	-0.0406502	1771.95	1772.12					82.7603	0.267805	1798.22	1797.19
82.8115	2.49963	1985.14	1975.95					82.8115	-0.30416	1923.95	1924.9					82.8115	-0.0390014	1725.77	1726.23					82.8115	-0.229259	1771.45	1772.45					82.8115	0.709176	1798.64	1795.89
82.8628	2.18443	1983.38	1975.13					82.8628	-0.26391	1923.93	1924.76					82.8628	-0.119353	1725.31	1725.9					82.8628	-0.416905	1770.52	1772.33					82.8628	0.597986	1798.37	1796.05
82.914	1.76397	1981.1	1974.63					82.914	-0.44873	1923.61	1925.03					82.914	-0.258792	1725.29	1725.7					82.914	-0.434047	1769.98	1771.87					82.914	0.204202	1798.1	1797.31
82.9653	1.32273	1979.18	1974.03					82.9653	-0.36347	1923.87	1925.01					82.9653	0.105644	1726.37	1726.15					82.9653	-0.382262	1770.07	1771.73					82.9653	0.201327	1798.08	1797.3
83.0166	0.71794	1977.08	1973.88					83.0166	-0.02788	1924.52	1924.6					83.0166	0.666598	1727.38	1726.02					83.0166	-0.450681	1769.73	1771.69					83.0166	0.219211	1797.86	1797.01
83.0678	0.567857	1975.49	1974.21					83.0678	0.106965	1924.47	1924.14					83.0678	0.838477	1727.14	1725.17					83.0678	-0.590276	1768.66	1771.23					83.0678	0.407739	1798.04	1796.46
83.1191	0.994914	1975.36	1973.22					83.1191	-0.06857	1924.17	1924.38					83.1191	0.683013	1726.3	1724.35					83.1191	-0.739631	1768.21	1771.43					83.1191	0.596267	1797.7	1795.39
83.1703	1.0507	1975.72	1971.38					83.1703	-0.46071	1923.53	1924.98					83.1703	0.509761	1725.91	1724.03					83.1703	-0.853848	1768.72	1772.44					83.1703	0.504267	1796.84	1794.89
83.2216	0.728346	1976.48	1971.52					83.2216	-0.65924	1922.74	1924.81					83.2216	0.357659	1725.68	1724.21					83.2216	-0.763547	1769.06	1772.38					83.2216	0.14389	1796.76	1796.2
83.2729	0.647359	1977.25	1973.57					83.2729	-0.48359	1922.98	1924.5					83.2729	0.296672	1725.33	1724.49					83.2729	-0.536617	1768.71	1771.05					83.2729	-0.13516	1797.28	1797.8
83.3241	0.568646	1976.76	1974.66					83.3241	-0.4685	1923.26	1924.73					83.3241	0.538549	1724.99	1724.34					83.3241	-0.496156	1767.95	1770.11					83.3241	-0.05881	1797.74	1797.97
83.3754	0.923306	1977.2	1974.48					83.3754	-0.66293	1922.66	1924.74					83.3754	0.818948	1724.97	1723.2					83.3754	-0.630204	1767.59	1770.33					83.3754	-0.04387	1797.52	1797.69
83.4267	1.68915	1978.52	1973.51					83.4267	-0.55552	1922.6	1924.35					83.4267	0.62313	1724.73	1722.26					83.4267	-0.666637	1767.72	1770.62					83.4267	0.170047	1797.73	1797.07
83.4779	1.81117	1978.13	1971.77					83.4779	-0.32167	1923.12	1924.13					83.4779	0.0136998	1723.73	1722.67					83.4779	-0.740221	1767.79	1771.01					83.4779	0.483326	1798.58	1796.71
83.5292	1.38094	1976.27	1970.89					83.5292	-0.38423	1923.28	1924.49					83.5292	-0.242728	1723.44	1723.68					83.5292	-0.857304	1768.67	1772.4					83.5292	0.335032	1798.11	1796.81
83.5804	0.982782	1974.69	1970.75					83.5804	-0.49644	1923.35	1924.91					83.5804	0.0331358	1724.17	1724.25					83.5804	-0.846414	1769.94	1773.63					83.5804	0.24482	1797.24	1796.29
83.6317	0.718739	1974.21	1970.76					83.6317	-0.45426	1923.42	1924.85					83.6317	0.116315	1724.06	1724.06					83.6317	-0.796706	1770.73	1774.2					83.6317	0.39656	1796.77	1795.23
83.683	0.467524	1973.47	1971.34					83.683	-0.47901	1923.19	1924.7					83.683	-0.007142	1723.52	1723.67					83.683	-0.875759	1771.27	1775.09					83.683	0.49536	1796.46	1794.55
83.7342	0.407496	1973.1	1971.6					83.7342	-0.58772	1922.79	1924.64					83.7342	-0.0555866	1723.83	1723.54					83.7342	-0.92748	1771.93	1775.97					83.7342	0.319768	1796.27	1795.03
83.7855	0.797156	1974.55	1971.47					83.7855	-0.84242	1922.02	1924.67					83.7855	0.106709	1724.2	1724.01					83.7855	-0.622436	1772.92	1775.63					83.7855	0.049869	1796.01	1795.82
83.8368	1.45149	1976.86	1971.36					83.8368	-1.06961	1921.53	1924.89					83.8368	0.432644	1723.96	1723.85					83.8368	-0.449512	1772.64	1774.6					83.8368	-0.03037	1795.87	1795.99
83.888	1.90905	1977.24	1971.06					83.888	-0.93283	1921.89	1924.83					83.888	0.463908	1723.54	1722.52					83.888	-0.56435	1771.08	1773.53					83.888	-0.14052	1795.46	1796.01
83.9393	1.58083	1973.86	1969.61					83.9393	-0.66573	1922.19	1924.28					83.9393	0.33766	1723.63	1722					83.9393	-0.460286	1770.49	1772.49					83.9393	-0.2186	1795.23	1796.08
83.9905	0.809091	1970.71	1967.54					83.9905	-0.4626	1922.54	1923.99					83.9905	0.114364	1723.85	1722.51					83.9905	-0.271831	1770.99	1772.18					83.9905	-0.2261	1795.2	1796.07
84.0418	0.330113	1970.11	1967.49					84.0418	-0.24874	1923	1923.78					84.0418	-0.267717	1723.86	1723.47					84.0418	-0.147815	1771.1	1771.75					84.0418	-0.12596	1795.06	1795.55
84.0931	0.21961	1970.23	1968.8					84.0931	-0.36075	1922.95	1924.08					84.0931	-0.414479	1724.26	1724.75					84.0931	-0.0968838	1770.57	1770.99					84.0931	0.164522	1795.12	1794.48
84.1443	0.199322	1970.56	1969.36					84.1443	-0.62972	1923.1	1925.08					84.1443	-0.269992	1724.53	1725.64					84.1443	-0.0748744	1770.27	1770.6					84.1443	0.17822	1795.22	1794.54
84.1956	0.085527	1970.51	1969.76					84.1956	-0.52711	1923.66	1925.32					84.1956	0.0297824	1724.55	1725.43					84.1956	-0.0603985	1770.37	1770.63					84.1956	-0.16436	1794.87	1795.51
84.2468	-0.01532	1969.89	1970.17					84.2468	-0.45081	1923.56	1924.98					84.2468	0.321508	1724.81	1724.45					84.2468	-0.125125	1770.48	1771.02					84.2468	-0.49521	1794.23	1796.14
84.2981	-0.12772	1969.28	1969.95					84.2981	-0.58215	1922.87	1924.7					84.2981	0.387789	1724.14	1723.74					84.2981	-0.117626	1770.82	1771.33					84.2981	-0.5421	1794.06	1796.15
84.3494	-0.29008	1969.13	1969.79					84.3494	-0.65729	1922.64	1924.71					84.3494	0.275416	1722.55	1722.86					84.3494	-0.0787529	1771.18	1771.52					84.3494	-0.53406	1793.9	1795.97
84.4006	-0.20871	1969.92	1970.3					84.4006	-0.59833	1923.22	1925.1					84.4006	-0.225432	1721.59	1721.63					84.4006	-0.208931	1771	1771.91					84.4006	-0.70183	1794.33	1797.05
84.4519	0.339438	1971.87	1970.76					84.4519	-0.63224	1923.08	1925.07					84.4519	-0.905007	1722.46	1722.34					84.4519	-0.351924	1770.74	1772.27					84.4519	-0.51127	1795.71	1797.69
84.5032	0.761514	1973.28	1970.51					84.5032	-0.7555	1922.12	1924.49					84.5032	-1.13551	1724.45	1725.47					84.5032	-0.252473	1771.28	1772.38					84.5032	-0.27242	1796.14	1797.19
84.5544	0.657414	1973.22	1970.24					84.5544	-0.7818	1922.22	1924.68					84.5544	-0.92155	1726.1	1728.23					84.5544	-0.066969	1771.92	1772.21					84.5544	-0.25472	1796.17	1797.16
84.6057	0.499633	1973.48	1970.6					84.6057	-0.73457	1922.88	1925.19					84.6057	-0.415867	1727.2	1729.16					84.6057	0.0939628	1772.33	1771.92					84.6057	-0.11925	1796.7	1797.16
84.6569	0.397008	1973.9	1971.48					84.6569	-0.3561	1923.64	1924.76					84.6569	-0.163045	1726.85	1728.58					84.6569	0.2088	1773.09	1772.18					84.6569	0.304148	1798.16	1796.98
84.7082	0.219918	1974.35	1972.32					84.7082	-0.32746	1923.69	1924.72					84.7082	-0.118195	1726.14	1727.39					84.7082	0.114331	1773.2	1772.7					84.7082	0.861391	1800.11	1796.78
84.7595	0.105903	1975.31	1973.47					84.7595	-0.75167	1922.59	1924.95					84.7595	0.254545	1726.05	1726.53					84.7595	-0.0208767	1772.81	1772.9					84.7595	0.78488	1799.79	1796.75
84.8107	-0.00784	1976.15	1974.89					84.8107	-0.64567	1922.16	1924.19					84.8107	0.452975	1725.48	1725.2					84.8107	-0.0670703	1772.78	1773.07					84.8107	0.181403	1797.46	1796.76
84.862	0.006726	1977.23	1976.18					84.862	-0.54768	1922.09	1923.82					84.862	0.204046	1725.3	1723.98					84.862	-0.0267285	1772.7	1772.82					84.862	-0.35032	1795.51	1796.87
84.9132	0.126421	1978.02	1977.2					84.9132	-0.70894	1922.03	1924.26					84.9132	-0.167996	1725.43	1724.62					84.9132	0.0647817	1772.47	1772.19					84.9132	-0.4905	1795.08	1796.98
84.9645	-0.04894	1978.05	1977.51					84.9645	-0.62855	1922.38	1924.36					84.9645	-0.499982	1724.94	1725.99					84.9645	0.0408339	1771.68	1771.5					84.9645	-0.39768	1795.53	1797.07
85.0158	-0.18559	1978.06	1978.24					85.0158	-0.68566	1922.32	1924.47					85.0158	-0.405751	1725.37	1726.61					85.0158	0.051423	1770.91	1770.69					85.0158	-0.59334	1795.39	1797.69
85.067	-0.07751	1978.18	1978.81					85.067	-0.78725	1922.2	1924.68					85.067	0.12261	1726.94	1726.72					85.067	0.0417839	1770.19	1770.01					85.067	-0.79661	1795.04	1798.12
85.1183	0.054824	1978.03	1978.49					85.1183	-0.44917	1922.8	1924.21					85.1183	0.387019	1727.78	1726.53					85.1183	-0.243926	1768.81	1769.87					85.1183	-0.67044	1795.03	1797.63
85.1696	0.126891	1977.72	1977.81					85.1696	-0.34091	1923.04	1924.11					85.1696	0.136202	1727.39	1726.5					85.1696	-0.506692	1767.91	1770.11					85.1696	-0.48394	1795.15	1797.02
85.2208	0.270326	1978.33	1977.21					85.2208	-0.51	1923.2	1924.8					85.2208	-0.119034	1726.38	1726.93					85.2208	-0.374685	1768.11	1769.74					85.2208	-0.33135	1795.25	1796.53
85.2721	0.737736	1980.1	1977.25					85.2721	-0.39591	1923.72	1924.96					85.2721	-0.122884	1725.24	1726.78					85.2721	-0.120625	1768.27	1768.8					85.2721	-0.39425	1794.6	1796.12
85.3233	1.12552	1981.8	1977.14					85.3233	-0.21451	1924.02	1924.69					85.3233	-0.0738383	1724.6	1725.65					85.3233	-0.181807	1767.38	1768.17					85.3233	-0.51934	1794.15	1796.16
85.3746	1.09425	1982.11	1977.28					85.3746	-0.10752	1924.58	1924.92					85.3746	0.0531525	1725.06	1724.84					85.3746	-0.365565	1766.83	1768.41					85.3746	-0.39998	1794.23	1795.78
85.4259	0.916441	1981.25	1977.72					85.4259	-0.23724	1924.59	1925.34					85.4259	0.230056	1725.88	1724.88					85.4259	-0.449633	1767.74	1769.69					85.4259	-0.34194	1793.89	1795.21
85.4771	0.947889	1981.14	1977.57					85.4771	-0.40449	1923.85	1925.12					85.4771	0.347562	1726.34	1725.12					85.4771	-0.472544	1769.17	1771.23					85.4771	-0.35373	1793.76	1795.12
85.5284	1.03241	1981.66	1977.33					85.5284	-0.50942	1923.12	1924.72					85.5284	0.346932	1726.73	1725.18					85.5284	-0.355098	1770.51	1772.06					85.5284	-0.47095	1793.85	1795.67
85.5797	0.888491	1981.29	1977.52					85.5797	-0.65879	1922.54	1924.61					85.5797	0.326228	1727.04	1725.58					85.5797	-0.15627	1771.36	1772.04					85.5797	-0.6391	1793.86	1796.34
85.6309	0.809955	1980.41	1977.72					85.6309	-0.77856	1922.17	1924.62					85.6309	0.516441	1727.23	1725.95					85.6309	-0.0829291	1771.1	1771.46					85.6309	-0.60375	1794.21	1796.55
85.6822	1.01298	1980.24	1977.16					85.6822	-0.8698	1921.77	1924.51					85.6822	0.685206	1727.46	1725.52					85.6822	-0.191838	1770.59	1771.43					85.6822	-0.44459	1794.74	1796.46
85.7334	1.31942	1980.39	1976.18					85.7334	-0.63006	1922.03	1924.01					85.7334	0.45447	1727.4	1725.19					85.7334	-0.259763	1770.68	1771.81					85.7334	-0.26453	1794.83	1795.85
85.7847	1.38419	1979.59	1975.1					85.7847	-0.20604	1922.83	1923.48					85.7847	0.200953	1727.26	1725.89					85.7847	-0.114801	1770.33	1770.83					85.7847	-0.24347	1794.25	1795.19
85.836	1.16147	1978.57	1974.04					85.836	-0.21814	1922.47	1923.16					85.836	0.332699	1726.76	1726.6					85.836	0.013081	1768.86	1768.8					85.836	-0.37578	1793.95	1795.41
85.8872	0.981804	1978.13	1973.92					85.8872	-0.53456	1921.58	1923.26					85.8872	0.483991	1725.55	1725.66					85.8872	-0.068381	1766.67	1766.97					85.8872	-0.35081	1795.23	1796.59
85.9385	0.937967	1977.68	1974.19					85.9385	-0.6226	1921.27	1923.23					85.9385	0.257636	1724.47	1723.95					85.9385	-0.251809	1764.6	1765.69					85.9385	-0.06032	1797.27	1797.5
85.9897	0.856385	1977.02	1973.92					85.9897	-0.68952	1921.19	1923.36					85.9897	-0.121745	1723.67	1723.62					85.9897	-0.565252	1763.08	1765.53					85.9897	0.244758	1799.03	1798.08
86.041	0.694586	1976.66	1973.59					86.041	-0.81482	1921.79	1924.35					86.041	-0.294512	1723.25	1724.08					86.041	-0.829445	1762.91	1766.5					86.041	0.300958	1800.48	1799.32
86.0923	0.450687	1976.25	1973.88					86.0923	-0.67424	1922.73	1924.85					86.0923	-0.489147	1723.17	1724.23					86.0923	-0.687689	1763.94	1766.92					86.0923	0.181245	1801.05	1800.35
86.1435	0.376028	1975.79	1974.44					86.1435	-0.57282	1922.72	1924.53					86.1435	-0.595414	1723.4	1724.8					86.1435	-0.355077	1764.56	1766.1					86.1435	-0.00713	1800.53	1800.55
86.1948	0.389749	1975.74	1974.29					86.1948	-0.81693	1921.91	1924.48					86.1948	-0.330929	1723.73	1725.38					86.1948	-0.287036	1764.11	1765.35					86.1948	-0.161	1800.09	1800.71
86.2461	0.231512	1975.79	1974.18					86.2461	-0.94753	1921.61	1924.59					86.2461	-0.0456443	1724.16	1724.83					86.2461	-0.480552	1763.38	1765.47					86.2461	-0.00366	1800.3	1800.32
86.2973	0.248983	1975.65	1974.87					86.2973	-0.70613	1922.2	1924.42					86.2973	0.0356627	1724.9	1724.31					86.2973	-0.623924	1763.76	1766.46					86.2973	0.19662	1799.99	1799.22
86.3486	0.374515	1975.07	1974.65					86.3486	-0.46854	1923.04	1924.51					86.3486	-0.0071717	1725.1	1724.78					86.3486	-0.639852	1765.65	1768.43					86.3486	0.183938	1799.25	1798.54
86.3998	0.538626	1975.21	1973.57					86.3998	-0.3357	1923.73	1924.79					86.3998	-0.125114	1725.05	1725.13					86.3998	-0.530131	1767.87	1770.17					86.3998	0.129242	1798.54	1798.04
86.4511	0.880328	1976.01	1973.05					86.4511	-0.09068	1924.08	1924.37					86.4511	-0.257568	1724.81	1725.47					86.4511	-0.519442	1768.48	1770.74					86.4511	-0.01456	1797.67	1797.72
86.5024	0.85006	1975.82	1972.49					86.5024	0.09459	1924.32	1924.02					86.5024	-0.173635	1724.67	1725.67					86.5024	-0.592844	1768.37	1770.95					86.5024	-0.061	1797.24	1797.48
86.5536	0.496066	1974.84	1972.42					86.5536	0.047146	1924.39	1924.24					86.5536	0.0842073	1725.14	1725.25					86.5536	-0.404838	1769.2	1770.96					86.5536	-0.04669	1797.28	1797.46
86.6049	0.378008	1973.21	1972.85					86.6049	-0.06824	1924	1924.21					86.6049	0.0570222	1725.04	1724.86					86.6049	-0.305268	1769.89	1771.21					86.6049	0.000691	1797.92	1797.92
86.6562	0.013703	1970.28	1971.7					86.6562	-0.20043	1923.88	1924.52					86.6562	-0.0735099	1724.92	1724.86					86.6562	-0.302979	1770.49	1771.81					86.6562	0.165875	1798.52	1797.88
86.7074	-0.31682	1968.06	1970.22					86.7074	-0.14566	1924.53	1924.99					86.7074	0.0225171	1725.24	1725.17					86.7074	-0.0332922	1771.68	1771.82					86.7074	0.172861	1798.5	1797.83
86.7587	-0.12585	1967.94	1969.33					86.7587	0.16883	1925.47	1924.93					86.7587	-0.0832617	1724.84	1725.16					86.7587	0.0721367	1771.77	1771.45					86.7587	0.271826	1799.18	1798.12
86.8099	0.063719	1968.39	1968.44					86.8099	0.475337	1926.52	1925.03					86.8099	-0.314711	1724.15	1725.11					86.8099	-0.0953918	1770.49	1770.91					86.8099	0.728195	1799.84	1797.03
86.8612	0.234738	1969.46	1968.13					86.8612	0.490806	1926.99	1925.45					86.8612	-0.389295	1723.91	1725.2					86.8612	-0.120913	1769.55	1770.07					86.8612	1.21414	1798.83	1794.14
86.9125	0.265493	1971.08	1968.52					86.9125	0.296083	1926.36	1925.43					86.9125	-0.266136	1724.22	1725.2					86.9125	-0.0945635	1769.07	1769.48					86.9125	1.02409	1797.34	1793.38
86.9637	0.200512	1972.4	1970.02					86.9637	0.068008	1925.19	1924.98					86.9637	-0.0050611	1724.49	1725.11					86.9637	-0.260093	1768.75	1769.88					86.9637	0.300825	1797.37	1796.2
87.015	0.144422	1972.6	1971.6					87.015	-0.25679	1924.09	1924.9					87.015	0.0101544	1723.94	1724.51					87.015	-0.382122	1769.01	1770.68					87.015	0.061251	1798.34	1798.1
87.0662	0.137036	1972.63	1972.03					87.0662	-0.49338	1923.33	1924.88					87.0662	-0.0289923	1723.89	1723.9					87.0662	-0.243862	1769.53	1770.59					87.0662	0.292891	1799.22	1798.09
87.1175	0.474941	1974.09	1972.08					87.1175	-0.46274	1923.08	1924.53					87.1175	-0.0887412	1724.34	1723.98					87.1175	-0.0804531	1769.55	1769.9					87.1175	0.412192	1800.45	1798.85
87.1688	0.733403	1975.04	1972.18					87.1688	-0.48482	1922.44	1923.97					87.1688	-0.350388	1724.12	1724.63					87.1688	-0.132358	1769.3	1769.87					87.1688	0.738164	1802.2	1799.34
87.22	0.751479	1974.7	1972.11					87.22	-0.63161	1921.25	1923.23					87.22	-0.477577	1724.46	1725.28					87.22	-0.176165	1769.92	1770.68					87.22	1.49444	1804.54	1798.75
87.2713	0.655984	1974.27	1971.69					87.2713	-0.61599	1920.89	1922.82					87.2713	-0.343052	1725.31	1726.04					87.2713	0.32874	1772.67	1771.24					87.2713	1.91649	1806.71	1799.28
87.3226	0.579565	1974.76	1971.64					87.3226	-0.70947	1921.11	1923.34					87.3226	-0.171486	1725.21	1726.45					87.3226	0.905085	1775.16	1771.23					87.3226	2.04588	1807.8	1799.87
87.3738	0.80821	1976.22	1972.44					87.3738	-0.83126	1921.38	1923.99					87.3738	-0.083638	1724.96	1725.78					87.3738	0.690732	1774.59	1771.59					87.3738	1.98486	1807.53	1799.84
87.4251	0.866716	1976.29	1972.99					87.4251	-0.6635	1921.85	1923.94					87.4251	0.143422	1725.64	1725.24					87.4251	0.148881	1772.78	1772.14					87.4251	1.51528	1806.05	1800.17
87.4763	0.530031	1974.72	1972.82					87.4763	-0.42056	1922.32	1923.64					87.4763	0.284759	1726.21	1725.16					87.4763	-0.0957865	1771.46	1771.87					87.4763	1.18262	1804.42	1799.84
87.5276	0.182344	1973.98	1972.6					87.5276	-0.43275	1922.34	1923.7					87.5276	0.256087	1726.06	1725.27					87.5276	-0.0905527	1770.29	1770.69					87.5276	0.972288	1802.8	1799.03
87.5789	-0.08442	1974.5	1973.25					87.5789	-0.83908	1921.6	1924.24					87.5789	0.219073	1725.88	1725.21					87.5789	0.0459588	1770.12	1769.92					87.5789	0.684223	1801.23	1798.58
87.6301	-0.17458	1975.71	1974.84					87.6301	-1.13294	1921.02	1924.58					87.6301	0.0497515	1726.04	1725.15					87.6301	0.0442512	1771.2	1771.01					87.6301	0.391953	1800.35	1798.83
87.6814	-0.01172	1977.37	1976.41					87.6814	-1.04009	1921.38	1924.65					87.6814	-0.0500593	1726.16	1725.88					87.6814	-0.244851	1771.13	1772.19					87.6814	0.123889	1799.63	1799.15
87.7326	0.27667	1978.77	1977.42					87.7326	-0.91486	1921.85	1924.73					87.7326	-0.0354461	1726.04	1726.33					87.7326	-0.414681	1770.04	1771.84					87.7326	0.026976	1798.56	1798.46
87.7839	0.340187	1978.89	1977.66					87.7839	-0.73985	1922.15	1924.48					87.7839	0.0926063	1725.91	1726.16					87.7839	-0.236981	1769.99	1771.02					87.7839	-0.00231	1797.97	1797.98
87.8352	0.009826	1977.97	1977.52					87.8352	-0.48352	1922.43	1923.95					87.8352	0.247858	1725.62	1725.6					87.8352	-0.0347398	1770.45	1770.6					87.8352	-0.02511	1798.36	1798.46
87.8864	-0.08264	1977.88	1977.93					87.8864	-0.39006	1922.41	1923.64					87.8864	0.287369	1725.51	1724.8					87.8864	-0.160705	1769.99	1770.69					87.8864	0.084459	1799.15	1798.82
87.9377	0.204944	1978.38	1978.21					87.9377	-0.51459	1922.17	1923.79					87.9377	0.322503	1725.97	1724.55					87.9377	-0.42266	1768.91	1770.75					87.9377	0.256599	1799.51	1798.51
87.989	0.286471	1978.23	1977.56					87.989	-0.79708	1922.08	1924.59					87.989	0.318539	1726.5	1724.9					87.989	-0.398603	1768.13	1769.87					87.989	0.231647	1798.88	1797.98
88.0402	0.232435	1977.5	1977.08					88.0402	-0.82838	1922.48	1925.09					88.0402	0.240496	1727.05	1725.44					88.0402	-0.324924	1767.43	1768.84					88.0402	-0.03647	1797.97	1798.11
88.0915	0.216789	1976.7	1976.57					88.0915	-0.62139	1922.55	1924.51					88.0915	0.290282	1727.55	1726.25					88.0915	-0.510453	1766.61	1768.83					88.0915	-0.16687	1797.95	1798.59
88.1427	0.132039	1976.33	1975.83					88.1427	-0.62904	1922.16	1924.14					88.1427	0.56037	1727.66	1726.59					88.1427	-0.647377	1766.29	1769.1					88.1427	-0.14709	1797.88	1798.45
88.194	-0.06146	1975.82	1975.8					88.194	-0.62421	1922.43	1924.39					88.194	0.673518	1727.49	1725.8					88.194	-0.51991	1766.43	1768.69					88.194	-0.34383	1796.91	1798.25
88.2453	-0.18866	1975.35	1976.06					88.2453	-0.43051	1923.04	1924.39					88.2453	0.675569	1727.21	1725.25					88.2453	-0.436465	1766.23	1768.12					88.2453	-0.52761	1796.15	1798.2
88.2965	-0.19753	1975.45	1976.11					88.2965	-0.12454	1923.86	1924.25					88.2965	0.743729	1726.74	1724.97					88.2965	-0.364463	1765.9	1767.48					88.2965	-0.20501	1796.63	1797.43
88.3478	-0.12841	1975.68	1976.24					88.3478	0.140022	1924.89	1924.45					88.3478	0.608456	1726.22	1724.28					88.3478	-0.200144	1765.64	1766.51					88.3478	0.338762	1797.66	1796.35
88.3991	0.09037	1976.08	1976.2					88.3991	0.097011	1924.85	1924.54					88.3991	0.497612	1726.59	1724.2					88.3991	-0.220012	1764.81	1765.76					88.3991	0.522989	1797.81	1795.79
88.4503	0.189404	1976.87	1975.72					88.4503	-0.12372	1924.14	1924.53					88.4503	0.431352	1727.3	1724.94					88.4503	-0.271307	1764.01	1765.19					88.4503	0.419635	1797.7	1796.07
88.5016	0.298875	1978.28	1976.11					88.5016	-0.13468	1924.21	1924.64					88.5016	0.433711	1727.62	1725.86					88.5016	-0.278398	1763.52	1764.73					88.5016	0.292098	1798.01	1796.88
88.5528	0.524119	1979.24	1977.09					88.5528	0.165983	1924.89	1924.37					88.5528	0.474192	1727.9	1726.18					88.5528	-0.375057	1762.43	1764.06					88.5528	0.000573	1798.07	1798.07
88.6041	0.493639	1978.78	1977.13					88.6041	0.402966	1925.37	1924.1					88.6041	0.232987	1727.55	1726.33					88.6041	-0.381985	1761.61	1763.26					88.6041	-0.186	1798.02	1798.74
88.6554	0.297284	1977.98	1976.8					88.6554	0.27674	1925.12	1924.25					88.6554	-0.0006961	1726.82	1726.78					88.6554	-0.399838	1761.69	1763.42					88.6554	0.016799	1798.24	1798.18
88.7066	0.288368	1977.83	1976.79					88.7066	-0.08413	1924.28	1924.55					88.7066	-0.163273	1726.29	1726.82					88.7066	-0.422415	1761.53	1763.36					88.7066	0.428997	1799.03	1797.37
88.7579	0.469355	1978.55	1976.67					88.7579	-0.25144	1924.05	1924.84					88.7579	-0.355885	1725.63	1726.83					88.7579	-0.268296	1761.31	1762.47					88.7579	1.0308	1799.59	1795.61
88.8091	0.589678	1979.68	1976.66					88.8091	-0.04481	1924.7	1924.84					88.8091	-0.354185	1725.11	1726.82					88.8091	-0.232757	1762.13	1763.14					88.8091	0.98041	1798.7	1794.91
88.8604	0.62876	1980.35	1977.32					88.8604	0.178773	1925.15	1924.59					88.8604	-0.263936	1725.21	1726.29					88.8604	-0.325847	1763.85	1765.26					88.8604	0.195314	1797.64	1796.89
88.9117	0.639349	1980.16	1977.83					88.9117	0.363141	1925.64	1924.5					88.9117	-0.0774962	1725.63	1726.09					88.9117	-0.240772	1766.01	1767.06					88.9117	-0.178	1797.41	1798.1
88.9629	0.695212	1979.99	1977.6					88.9629	0.574909	1926.09	1924.28					88.9629	0.241729	1725.96	1725.89					88.9629	-0.106588	1767.87	1768.34					88.9629	-0.11987	1797.73	1798.2
89.0142	0.910863	1980.91	1977.2					89.0142	0.687327	1926.33	1924.16					89.0142	0.299449	1726.35	1725.16					89.0142	-0.175656	1768.46	1769.22					89.0142	-0.0074	1798.06	1798.09
89.0655	1.08279	1981.63	1977.26					89.0655	0.681196	1926.92	1924.78					89.0655	0.279345	1726.77	1725.35					89.0655	-0.162364	1768.97	1769.68					89.0655	0.156554	1797.53	1796.92
89.1167	0.86848	1980.68	1977.29					89.1167	0.605576	1927.19	1925.29					89.1167	0.20008	1726.32	1725.85					89.1167	0.125681	1770.62	1770.07					89.1167	0.229083	1796.32	1795.43
89.168	0.486725	1978.84	1977.2					89.168	0.578783	1926.68	1924.86					89.168	0.0294875	1725.91	1725.66					89.168	0.33286	1772.14	1770.7					89.168	0.054395	1795.33	1795.12
89.2192	0.380331	1977.82	1976.89					89.2192	0.55779	1926.06	1924.31					89.2192	0.00186355	1726.14	1725.81					89.2192	0.26415	1772.06	1770.91					89.2192	-0.16071	1794.93	1795.56
89.2705	0.365149	1977.43	1976.29					89.2705	0.42115	1926.06	1924.73					89.2705	-0.192923	1725.55	1726.14					89.2705	0.0565087	1771.05	1770.81					89.2705	-0.00343	1795.3	1795.32
89.3218	0.37841	1976.94	1975.97					89.3218	0.424168	1926.69	1925.36					89.3218	-0.416185	1724.58	1726.19					89.3218	-0.0555692	1770.84	1771.08					89.3218	0.393479	1795.98	1794.46
89.373	0.556571	1977.02	1975.42					89.373	0.631104	1926.88	1924.9					89.373	-0.484949	1724.12	1725.96					89.373	-0.0276552	1771.32	1771.44					89.373	0.262507	1795.36	1794.34
89.4243	0.614173	1977	1974.79					89.4243	0.546647	1926.19	1924.47					89.4243	-0.632657	1724.02	1725.73					89.4243	-0.038853	1771.18	1771.35					89.4243	-0.02982	1794.36	1794.48
89.4756	0.531896	1976.1	1974.54					89.4756	0.07767	1925.34	1925.1					89.4756	-0.742683	1724.17	1726.13					89.4756	-0.20702	1770.26	1771.16					89.4756	0.165847	1794.18	1793.54
89.5268	0.460333	1975.12	1973.97					89.5268	-0.25392	1924.66	1925.46					89.5268	-0.509744	1725	1726.64					89.5268	-0.326848	1769.58	1771					89.5268	0.299301	1794.19	1793.03
89.5781	0.351849	1974.74	1973.27					89.5781	-0.27688	1924.27	1925.14					89.5781	-0.146088	1726.07	1726.7					89.5781	-0.268011	1769.37	1770.53					89.5781	0.08449	1794.68	1794.36
89.6293	0.226398	1974.5	1973.34					89.6293	-0.46943	1923.7	1925.18					89.6293	-0.22872	1725.64	1726.56					89.6293	-0.217649	1769.48	1770.43					89.6293	0.096964	1795.85	1795.48
89.6806	0.259715	1974.63	1973.6					89.6806	-0.83269	1922.84	1925.46					89.6806	-0.45781	1724.49	1726.4					89.6806	-0.23406	1769.62	1770.64					89.6806	0.276101	1796.25	1795.19
89.7319	0.42746	1975.78	1973.59					89.7319	-1.06215	1922.09	1925.43					89.7319	-0.311247	1724.49	1726.02					89.7319	-0.247759	1769.05	1770.13					89.7319	-0.05221	1795.2	1795.4
89.7831	0.588595	1977.16	1974.07					89.7831	-0.93288	1922.41	1925.34					89.7831	-0.169741	1724.88	1725.53					89.7831	-0.23944	1768.06	1769.1					89.7831	-0.42756	1794.44	1796.1
89.8344	0.724332	1977.89	1974.81					89.8344	-0.58815	1923.27	1925.12					89.8344	-0.302804	1724.97	1725.44					89.8344	-0.214591	1767.45	1768.38					89.8344	-0.39629	1795.02	1796.55
89.8856	0.777603	1977.65	1974.98					89.8856	-0.22961	1922.96	1923.68					89.8856	-0.429138	1724.96	1725.97					89.8856	-0.320147	1767.27	1768.66					89.8856	-0.25549	1796.33	1797.32
89.9369	0.99597	1977.39	1974.54					89.9369	-0.05428	1921.99	1922.16					89.9369	-0.453742	1724.72	1726.39					89.9369	-0.671602	1767.01	1769.93					89.9369	-0.25243	1797.4	1798.38
89.9882	1.12199	1977.17	1973.41					89.9882	-0.26883	1921.61	1922.46					89.9882	-0.543181	1724.27	1726.22					89.9882	-0.813419	1767.15	1770.69					89.9882	-0.22257	1797.58	1798.44
90.0394	0.855391	1976.14	1972.68					90.0394	-0.30392	1921.71	1922.67					90.0394	-0.664414	1723.36	1726.08					90.0394	-0.625788	1767.92	1770.64					90.0394	0.008216	1796.95	1796.92
90.0907	0.570489	1975.01	1972.71					90.0907	-0.35799	1921.23	1922.36					90.0907	-0.685859	1722.51	1725.57					90.0907	-0.589624	1768.25	1770.82					90.0907	0.087557	1796.57	1796.23
90.142	0.281666	1974.63	1972.73					90.142	-0.56411	1921.05	1922.82					90.142	-0.435547	1722.93	1724.79					90.142	-0.384035	1769.31	1770.98					90.142	-0.17825	1796.76	1797.45
90.1932	-0.00874	1974.33	1973.5					90.1932	-0.52891	1921.67	1923.34					90.1932	0.0691852	1723.79	1724.37					90.1932	0.287271	1772.36	1771.11					90.1932	-0.40093	1796.78	1798.33
90.2445	-0.03061	1973.55	1974.36					90.2445	-0.44489	1921.87	1923.26					90.2445	0.199471	1723.33	1723.56					90.2445	0.761465	1774.29	1770.98					90.2445	-0.42871	1796.44	1798.1
90.2957	0.058569	1972.7	1973.67					90.2957	-0.37012	1922.04	1923.2					90.2957	-0.0124155	1722.66	1722.67					90.2957	0.729889	1773.54	1770.36					90.2957	-0.4439	1795.62	1797.34
90.347	0.053222	1972.14	1972.47					90.347	-0.35613	1922.77	1923.89					90.347	-0.247442	1723	1722.7					90.347	0.487727	1772.36	1770.24					90.347	-0.41602	1795.18	1796.79
90.3983	0.047176	1971.74	1971.93					90.3983	-0.47272	1923.33	1924.82					90.3983	-0.361633	1724.24	1723.82					90.3983	0.353673	1771.5	1769.97					90.3983	-0.60799	1795.96	1798.31
90.4495	0.050183	1971.74	1971.55					90.4495	-0.48697	1923.56	1925.09					90.4495	0.06861	1726.41	1725.44					90.4495	0.39116	1771.05	1769.36					90.4495	-0.83388	1797.29	1800.53
90.5008	0.015603	1972.43	1971.54					90.5008	-0.41858	1923.65	1924.96					90.5008	0.405974	1727.5	1726.18					90.5008	0.413381	1770.85	1769.06					90.5008	-0.65258	1798.54	1801.07
90.5521	-0.10775	1972.67	1972.36					90.5521	-0.46867	1923.34	1924.81					90.5521	0.264115	1726.73	1726.15					90.5521	0.2898	1769.29	1768.03					90.5521	-0.39251	1799.23	1800.75
90.6033	-0.14581	1972.77	1973.1					90.6033	-0.41503	1923.03	1924.34					90.6033	0.215032	1725.5	1725.85					90.6033	0.145965	1767.38	1766.75					90.6033	-0.22424	1799.06	1799.92
90.6546	-0.11986	1973.61	1973.36					90.6546	-0.36293	1923.01	1924.15					90.6546	0.334213	1724.98	1724.79					90.6546	-0.0169432	1766.46	1766.54					90.6546	-0.229	1798.65	1799.54
90.7058	-0.22486	1974.66	1974.09					90.7058	-0.50866	1922.96	1924.56					90.7058	0.421278	1725.49	1723.87					90.7058	-0.179318	1766.66	1767.43					90.7058	-0.38064	1798.87	1800.35
90.7571	-0.08542	1976.2	1975.57					90.7571	-0.4187	1923.45	1924.77					90.7571	0.565779	1726.33	1724.09					90.7571	-0.229753	1768.43	1769.42					90.7571	-0.3526	1799.15	1800.52
90.8084	0.156273	1977.29	1976.54					90.8084	-0.24578	1923.85	1924.63					90.8084	0.731938	1727.03	1724.45					90.8084	-0.28048	1769.48	1770.7					90.8084	-0.06773	1799.32	1799.58
90.8596	0.06293	1977.2	1976.66					90.8596	-0.36959	1923.28	1924.45					90.8596	0.729859	1726.89	1724.6					90.8596	-0.408124	1769.29	1771.06					90.8596	0.240533	1799.72	1798.79
90.9109	-0.06055	1977.24	1976.95					90.9109	-0.43761	1922.95	1924.33					90.9109	0.579793	1726.04	1724.46					90.9109	-0.551339	1769.63	1772.03					90.9109	0.36789	1799.94	1798.51
90.9621	-0.18067	1977.65	1977.49					90.9621	-0.46679	1923	1924.46					90.9621	0.319348	1725.77	1724.11					90.9621	-0.337177	1770.49	1771.95					90.9621	0.503185	1800.55	1798.6
91.0134	-0.28981	1977.89	1978.38					91.0134	-0.55203	1923.09	1924.82					91.0134	0.246542	1725.94	1724.71					91.0134	0.0131004	1770.69	1770.63					91.0134	0.886615	1801.48	1798.04
91.0647	-0.09421	1978.04	1979.06					91.0647	-0.55457	1922.98	1924.72					91.0647	0.196324	1725.39	1725.12					91.0647	0.108738	1770.01	1769.54					91.0647	1.23841	1801.32	1796.52
91.1159	0.29853	1977.77	1978.42					91.1159	-0.60687	1922.24	1924.15					91.1159	-0.0613332	1724.29	1724.74					91.1159	0.0895081	1769.23	1768.84					91.1159	1.08714	1800	1795.79
91.1672	0.42459	1976.77	1976.57					91.1672	-0.61902	1921.88	1923.83					91.1672	-0.0209204	1723.61	1724.5					91.1672	-0.128053	1768.17	1768.72					91.1672	0.852602	1799.06	1795.76
91.2185	0.136258	1975.84	1975.07					91.2185	-0.57508	1922.26	1924.07					91.2185	0.243351	1723.54	1723.68					91.2185	-0.392007	1767.43	1769.13					91.2185	0.848854	1799.11	1795.83
91.2697	-0.06825	1975.73	1975.29					91.2697	-0.52885	1922.89	1924.55					91.2697	0.25277	1723.84	1722.74					91.2697	-0.424754	1767.5	1769.35					91.2697	0.789611	1799.53	1796.48
91.321	0.180556	1975.83	1976.01					91.321	-0.33156	1923.62	1924.66					91.321	0.0625905	1724.06	1723					91.321	-0.351839	1767.31	1768.84					91.321	0.574312	1799.82	1797.59
91.3722	0.319942	1974.99	1975.11					91.3722	-0.11213	1923.96	1924.32					91.3722	-0.0394063	1724.22	1723.86					91.3722	-0.380147	1766.94	1768.59					91.3722	0.309349	1799.8	1798.6
91.4235	-0.06279	1974.3	1973.71					91.4235	0.007819	1923.87	1923.84					91.4235	0.114869	1725.01	1724.35					91.4235	-0.316216	1766.97	1768.35					91.4235	0.374092	1800.07	1798.62
91.4748	-0.13109	1975.36	1974.55					91.4748	-0.00215	1923.38	1923.39					91.4748	0.490662	1726.35	1724.63					91.4748	-0.086439	1766.77	1767.15					91.4748	0.637637	1800.49	1798.02
91.526	0.603094	1977.28	1975.88					91.526	-0.08222	1922.95	1923.2					91.526	0.746693	1726.9	1724.72					91.526	-0.10109	1765.45	1765.89					91.526	0.870188	1800.75	1797.38
91.5773	1.04901	1977.32	1974.87					91.5773	0.130422	1923.85	1923.44					91.5773	0.746032	1726.68	1724.42					91.5773	-0.312796	1764.24	1765.59					91.5773	0.985047	1800.94	1797.13
91.6285	0.905063	1975.32	1973.12					91.6285	0.685029	1925.79	1923.63					91.6285	0.751381	1727.04	1724.2					91.6285	-0.336734	1764.47	1765.93					91.6285	0.93498	1800.84	1797.21
91.6798	1.02058	1973.51	1971.7					91.6798	1.04798	1926.81	1923.51					91.6798	0.644587	1727.22	1724.54					91.6798	-0.0411027	1765.71	1765.89					91.6798	0.708436	1800.76	1798.02
91.7311	0.7227	1971.14	1969.43					91.7311	1.11749	1927.06	1923.55					91.7311	0.44043	1726.18	1725.08					91.7311	0.2148	1766.93	1766					91.7311	0.428073	1801.34	1799.68
91.7823	-0.00164	1970.06	1968.26					91.7823	1.00494	1927.16	1924					91.7823	0.404271	1725.5	1724.71					91.7823	0.0373413	1767.09	1766.93					91.7823	0.676176	1802.36	1799.74
91.8336	-0.00621	1972.37	1970.07					91.8336	0.659082	1926.6	1924.53					91.8336	0.443204	1726.19	1724.16					91.8336	-0.327435	1766.06	1767.48					91.8336	1.04726	1802.64	1798.58
91.8849	0.144471	1974.57	1972.4					91.8849	0.629874	1926.64	1924.66					91.8849	0.559131	1727.41	1724.71					91.8849	-0.450473	1764.99	1766.95					91.8849	1.03176	1802.54	1798.54
91.9361	0.095942	1976.04	1973.99					91.9361	0.879992	1927.08	1924.31					91.9361	0.654506	1728.39	1725.55					91.9361	-0.425077	1764.32	1766.17					91.9361	1.2823	1803.93	1798.96
91.9874	0.315026	1978.05	1975.65					91.9874	0.930787	1926.83	1923.9					91.9874	0.641594	1728.41	1726.21					91.9874	-0.491015	1763.64	1765.77					91.9874	1.99235	1806.93	1799.21
92.0386	0.537935	1979.38	1976.79					92.0386	0.734752	1926.47	1924.16					92.0386	0.703518	1727.69	1726.28					92.0386	-0.450677	1764.05	1766					92.0386	2.58414	1809.71	1799.69
92.0899	0.459244	1979.54	1977.22					92.0899	0.610686	1926.36	1924.44					92.0899	0.680378	1727.19	1725.35					92.0899	-0.356585	1765.22	1766.77					92.0899	2.66972	1809.98	1799.63
92.1412	0.3003	1979.16	1977.69					92.1412	0.662285	1926.06	1923.97					92.1412	0.477599	1726.85	1724.93					92.1412	-0.495426	1765.22	1767.37					92.1412	2.27551	1807.92	1799.1
92.1924	0.423042	1978.4	1977.96					92.1924	0.624033	1925.6	1923.63					92.1924	0.434525	1726.41	1725.27					92.1924	-0.666545	1764.45	1767.34					92.1924	1.71052	1805.78	1799.15
92.2437	0.425687	1976.81	1976.71					92.2437	0.672519	1925.71	1923.6					92.2437	0.490342	1726.2	1724.96					92.2437	-0.569815	1763.93	1766.4					92.2437	1.41967	1804.76	1799.26
92.295	0.155917	1975.37	1975.1					92.295	0.722904	1925.95	1923.68					92.295	0.397422	1726.13	1724.57					92.295	-0.520618	1763.21	1765.47					92.295	1.45579	1804.79	1799.15
92.3462	0.048304	1974.95	1974.75					92.3462	0.630173	1925.79	1923.81					92.3462	0.306013	1725.98	1724.8					92.3462	-0.679292	1762.91	1765.85					92.3462	1.48728	1805.03	1799.26
92.3975	0.123409	1975.19	1974.76					92.3975	0.456371	1925.18	1923.74					92.3975	0.35565	1726.27	1724.96					92.3975	-0.727389	1764.04	1767.2					92.3975	1.48292	1804.91	1799.16
92.4487	0.119939	1976	1974.7					92.4487	0.286764	1924.56	1923.65					92.4487	0.372954	1726.56	1725.09					92.4487	-0.731912	1766	1769.18					92.4487	1.4956	1804.14	1798.34
92.5	-0.10762	1976.89	1975.52					92.5	0.065144	1924.11	1923.9					92.5	0.447771	1726.55	1725.32					92.5	-0.620886	1767.54	1770.24					92.5	1.36644	1802.9	1797.61
92.5513	-0.35591	1977.31	1977.32					92.5513	-0.17899	1923.7	1924.26					92.5513	0.498657	1726.35	1725.06					92.5513	-0.433647	1768.1	1769.98					92.5513	1.13206	1801.99	1797.61
92.6025	-0.42611	1976.99	1978.73					92.6025	-0.14732	1923.77	1924.23					92.6025	0.315837	1725.72	1724.7					92.6025	-0.455775	1768.51	1770.5					92.6025	1.2786	1801.58	1796.63
92.6538	-0.19287	1977.17	1978.7					92.6538	0.060032	1924.18	1923.99					92.6538	0.229029	1725.67	1724.67					92.6538	-0.435838	1769.37	1771.27					92.6538	1.57202	1800.88	1794.8
92.705	0.079141	1978.25	1977.94					92.705	0.255014	1924.58	1923.78					92.705	0.217624	1726.18	1724.91					92.705	-0.356489	1770.31	1771.86					92.705	1.45117	1799.55	1793.94
92.7563	0.36373	1978.81	1977.93					92.7563	0.350027	1924.79	1923.68					92.7563	0.0423862	1725.94	1725.46					92.7563	-0.289341	1770.96	1772.22					92.7563	1.20976	1797.8	1793.13
92.8076	0.652924	1978.76	1977.35					92.8076	0.119455	1924.41	1924.03					92.8076	-0.0772244	1725.36	1725.8					92.8076	-0.121367	1771.51	1772.04					92.8076	1.04193	1795.85	1791.82
92.8588	0.668633	1978.87	1976.14					92.8588	-0.31735	1923.66	1924.65					92.8588	0.00613991	1725.16	1725.62					92.8588	-0.0194261	1771.61	1771.69					92.8588	0.629997	1794.38	1791.95
92.9101	0.712438	1978.96	1976.19					92.9101	-0.59685	1923.08	1924.95					92.9101	0.0494307	1725.05	1725.14					92.9101	0.0328925	1770.67	1770.52					92.9101	0.14841	1794.3	1793.73
92.9614	0.85418	1978.82	1976.1					92.9614	-0.60792	1922.79	1924.7					92.9614	0.0973801	1724.98	1724.89					92.9614	-0.0253106	1770.03	1770.14					92.9614	0.292822	1795.67	1794.54
93.0126	0.805958	1978.77	1975.4					93.0126	-0.37971	1922.67	1923.87					93.0126	0.00512042	1724.58	1724.66					93.0126	-0.215921	1770.43	1771.37					93.0126	0.616771	1796.66	1794.28
93.0639	0.318314	1978.12	1975.54					93.0639	-0.18229	1922.42	1922.99					93.0639	-0.157065	1724.33	1724.56					93.0639	-0.23772	1770.32	1771.36					93.0639	0.632102	1797.14	1794.69
93.1151	-0.09783	1977.58	1976.84					93.1151	-0.19428	1922.31	1922.92					93.1151	0.0891371	1724.87	1724.85					93.1151	-0.135009	1769.5	1770.09					93.1151	0.727949	1797.98	1795.16
93.1664	0.099338	1978.52	1977.98					93.1664	-0.26383	1922.6	1923.43					93.1664	0.325173	1724.85	1724.57					93.1664	-0.0970587	1768.71	1769.14					93.1664	0.888441	1798.19	1794.76
93.2177	0.197912	1979.1	1978.12					93.2177	-0.17056	1922.87	1923.4					93.2177	0.0715175	1723.98	1723.77					93.2177	-0.0634526	1768.1	1768.37					93.2177	1.01539	1798.15	1794.22
93.2689	0.132002	1978.7	1978.3					93.2689	-0.19139	1922.62	1923.22					93.2689	0.0339107	1723.95	1723.74					93.2689	0.0861656	1768.07	1767.7					93.2689	1.03359	1798.27	1794.28
93.3202	0.172938	1978.07	1978.17					93.3202	-0.42488	1922.2	1923.54					93.3202	0.368548	1724.34	1723.84					93.3202	0.253318	1768.12	1767.03					93.3202	1.01259	1798.52	1794.6
93.3715	-0.00106	1976.47	1977.38					93.3715	-0.06817	1922.87	1923.08					93.3715	0.299988	1723.41	1723.12					93.3715	0.255469	1767.85	1766.74					93.3715	1.04416	1799.16	1795.12
93.4227	-0.12877	1975.33	1976.48					93.4227	0.374566	1923.76	1922.59					93.4227	0.108449	1721.91	1722.41					93.4227	0.164203	1767.34	1766.63					93.4227	0.880505	1798.61	1795.2
93.474	-0.1325	1975.51	1975.85					93.474	-0.0231	1923.31	1923.38					93.474	-0.0647819	1721.28	1721.55					93.474	0.0565849	1766.92	1766.68					93.474	0.601928	1797.06	1794.73
93.5252	-0.09695	1975.58	1976.04					93.5252	-0.6071	1922.39	1924.3					93.5252	-0.257018	1722.06	1721.49					93.5252	-0.117886	1766.84	1767.35					93.5252	0.513547	1797.22	1795.24
93.5765	0.128717	1976.06	1975.96					93.5765	-0.78116	1922.18	1924.64					93.5765	-0.096596	1723.52	1722.92					93.5765	-0.3574	1766.18	1767.73					93.5765	0.689194	1798.79	1796.12
93.6278	0.217768	1976.9	1975.54					93.6278	-0.47473	1923	1924.49					93.6278	0.222669	1724.24	1723.84					93.6278	-0.449765	1765.37	1767.33					93.6278	0.597613	1799.24	1796.93
93.679	0.23315	1976.71	1976.03					93.679	-0.25049	1923.26	1924.05					93.679	0.40963	1724.29	1723.5					93.679	-0.248493	1765.78	1766.85					93.679	0.245432	1798.9	1797.95
93.7303	0.352559	1976.13	1975.77					93.7303	-0.35375	1922.58	1923.69					93.7303	0.259723	1724.1	1722.93					93.7303	0.0202483	1766.57	1766.48					93.7303	0.352956	1799.57	1798.21
93.7815	0.209051	1975.38	1974.72					93.7815	-0.37076	1922.54	1923.7					93.7815	0.0216434	1724.36	1723.24					93.7815	-0.002341	1766.41	1766.42					93.7815	0.923384	1801.74	1798.16
93.8328	0.131928	1975.31	1974.54					93.8328	-0.4569	1922.36	1923.79					93.8328	0.0239541	1725.19	1724.29					93.8328	-0.243918	1766.05	1767.11					93.8328	1.51119	1804.4	1798.54
93.8841	0.309175	1976.36	1974.78					93.8841	-0.63196	1921.41	1923.4					93.8841	0.123889	1725.65	1725.11					93.8841	-0.310201	1765.75	1767.1					93.8841	1.67633	1805.8	1799.3
93.9353	0.265007	1977.14	1975.12					93.9353	-0.7593	1920.47	1922.86					93.9353	0.14191	1725.71	1725.23					93.9353	-0.334955	1765.08	1766.54					93.9353	1.45354	1805.66	1800.02
93.9866	0.165691	1977.94	1976.07					93.9866	-0.91205	1919.62	1922.48					93.9866	-0.141439	1725.03	1725.23					93.9866	-0.28842	1765.71	1766.97					93.9866	1.35095	1805.63	1800.39
94.0379	0.078225	1978.32	1977.27					94.0379	-0.92862	1919.56	1922.47					94.0379	-0.272526	1724.33	1725.5					94.0379	-0.0414813	1767.65	1767.83					94.0379	1.61161	1806.45	1800.2
94.0891	-0.15624	1978.12	1978.01					94.0891	-0.7745	1920.33	1922.76					94.0891	0.0840819	1724.79	1725.23					94.0891	0.0405913	1768.9	1768.72					94.0891	1.75231	1806.12	1799.32
94.1404	-0.29164	1978.45	1978.75					94.1404	-0.67514	1920.82	1922.94					94.1404	0.406668	1725.64	1724.51					94.1404	-0.0914813	1769.14	1769.54					94.1404	1.59228	1804.31	1798.14
94.1916	0.002787	1979.55	1979.62					94.1916	-0.58919	1921.27	1923.12					94.1916	0.354696	1725.93	1724.29					94.1916	-0.289089	1769.57	1770.82					94.1916	1.17576	1802.11	1797.56
94.2429	0.505226	1980.19	1979.54					94.2429	-0.58316	1921.34	1923.17					94.2429	0.10516	1725.64	1724.75					94.2429	-0.315729	1771.23	1772.61					94.2429	0.667702	1800.14	1797.55
94.2942	0.83563	1979.53	1978.17					94.2942	-0.62358	1921.16	1923.12					94.2942	-0.0102333	1725.6	1725.29					94.2942	0.00989616	1773.26	1773.21					94.2942	0.675788	1799.85	1797.24
94.3454	0.858683	1978.06	1976.18					94.3454	-0.5187	1921.11	1922.74					94.3454	-0.0810317	1725.84	1725.63					94.3454	0.271407	1774.02	1772.84					94.3454	0.886457	1800.22	1796.79
94.3967	0.64387	1976.77	1974.62					94.3967	-0.45789	1920.77	1922.21					94.3967	-0.0732763	1726.12	1726.11					94.3967	0.106893	1773.09	1772.62					94.3967	0.789112	1799.73	1796.68
94.4479	0.600182	1976.39	1974.19					94.4479	-0.60718	1920.71	1922.62					94.4479	0.117896	1726.17	1726.36					94.4479	0.0369468	1772.21	1772.05					94.4479	0.503948	1799.06	1797.11
94.4992	0.621555	1975.6	1973.99					94.4992	-0.78884	1920.96	1923.44					94.4992	0.0227993	1725.33	1725.78					94.4992	0.19557	1771.83	1770.98					94.4992	0.185199	1798.55	1797.83
94.5505	0.398677	1974.36	1973.11					94.5505	-0.57266	1921.72	1923.52					94.5505	-0.190834	1724.67	1725.26					94.5505	0.0356672	1770.92	1770.77					94.5505	-0.01569	1798.24	1798.3
94.6017	0.135644	1974.28	1972.76					94.6017	-0.18378	1923.02	1923.6					94.6017	-0.144	1725	1725.3					94.6017	-0.14173	1770.74	1771.35					94.6017	-0.07981	1798.1	1798.41
94.653	0.19387	1974.74	1973.74					94.653	-0.12159	1923.55	1923.93					94.653	0.107647	1725.66	1725.47					94.653	-0.0776621	1771.05	1771.38					94.653	-0.23061	1797.3	1798.19
94.7043	0.263004	1974.45	1973.97					94.7043	-0.26157	1923.08	1923.9					94.7043	0.428663	1725.77	1725.3					94.7043	-0.0276926	1770.58	1770.7					94.7043	-0.40464	1796.52	1798.09
94.7555	0.241416	1974.15	1973.39					94.7555	-0.48394	1922.31	1923.83					94.7555	0.392781	1725.13	1724.35					94.7555	-0.0988461	1769.55	1769.98					94.7555	-0.46088	1796.86	1798.64
94.8068	0.492724	1974.81	1973.18					94.8068	-0.60591	1922.11	1924.01					94.8068	0.145649	1724.56	1723.83					94.8068	-0.288286	1768.4	1769.65					94.8068	-0.39855	1797.19	1798.74
94.858	0.867947	1975.81	1972.84					94.858	-0.50935	1922.7	1924.3					94.858	-0.0071233	1724.53	1724.08					94.858	-0.372839	1767.89	1769.5					94.858	-0.2813	1797.04	1798.12
94.9093	1.06687	1976.68	1972.34					94.9093	-0.4206	1923.09	1924.42					94.9093	-0.19969	1724.53	1724.56					94.9093	-0.301307	1767.79	1769.1					94.9093	-0.32689	1796.57	1797.83
94.9606	0.904992	1977.4	1972.41					94.9606	-0.3043	1923.49	1924.45					94.9606	-0.358645	1724.19	1725.19					94.9606	-0.220067	1767.54	1768.5					94.9606	-0.39916	1796.35	1797.89
95.0118	0.688861	1977.95	1973.78					95.0118	-0.20828	1924.17	1924.83					95.0118	-0.169816	1723.99	1725.38					95.0118	-0.295932	1767.18	1768.46					95.0118	-0.34384	1796.41	1797.75
95.0631	0.596384	1978.56	1975.19					95.0631	-0.15923	1924.6	1925.1					95.0631	0.176586	1724.02	1724.55					95.0631	-0.529083	1766.45	1768.75					95.0631	-0.29925	1795.8	1796.95
95.1144	0.441449	1978.83	1976.17					95.1144	-0.0202	1924.64	1924.7					95.1144	0.089978	1723.91	1723.43					95.1144	-0.670935	1766.16	1769.07					95.1144	-0.16941	1795.26	1795.92
95.1656	0.328922	1977.81	1977.06					95.1656	-0.11347	1923.99	1924.34					95.1656	-0.251368	1723.43	1723.61					95.1656	-0.590798	1766.9	1769.47					95.1656	-0.0046	1795.01	1795.03
95.2169	0.415663	1976.99	1976.49					95.2169	-0.3834	1923.21	1924.42					95.2169	-0.320692	1722.91	1724.26					95.2169	-0.481795	1767.53	1769.63					95.2169	0.468026	1796.48	1794.67
95.2681	0.565046	1976.76	1975.33					95.2681	-0.60741	1922.35	1924.26					95.2681	-0.244902	1722.52	1723.97					95.2681	-0.520338	1768.15	1770.41					95.2681	1.7275	1801.17	1794.49
95.3194	0.556796	1976.21	1974.49					95.3194	-0.8133	1921.8	1924.36					95.3194	-0.126782	1722.51	1723.34					95.3194	-0.349576	1769.85	1771.37					95.3194	2.82291	1805.12	1794.2
95.3707	0.434615	1975.93	1973.98					95.3707	-0.88027	1922.21	1924.98					95.3707	0.0826488	1722.69	1722.93					95.3707	-0.0753531	1771.29	1771.61					95.3707	2.96636	1805.87	1794.4
95.4219	0.320271	1975.39	1974.19					95.4219	-0.83887	1922.32	1924.95					95.4219	0.192478	1722.27	1722.42					95.4219	-0.0667077	1771.43	1771.72					95.4219	2.58033	1804.92	1794.94
95.4732	0.123628	1975.45	1974.11					95.4732	-0.82064	1921.9	1924.48					95.4732	0.0756133	1722.26	1721.63					95.4732	-0.0900271	1771.54	1771.93					95.4732	2.22085	1803.69	1795.1
95.5244	-0.04285	1976.56	1974.96					95.5244	-0.77323	1921.85	1924.28					95.5244	0.0207223	1723.27	1722.01					95.5244	-0.119045	1771.27	1771.79					95.5244	2.06445	1802.94	1794.96
95.5757	0.023434	1977.5	1976.74					95.5757	-0.57135	1922.48	1924.28					95.5757	0.078657	1724.18	1723.2					95.5757	-0.214426	1770.01	1770.94					95.5757	1.75025	1802.13	1795.36
95.627	0.252517	1978.16	1977.41					95.627	-0.36982	1922.86	1924.03					95.627	0.0833918	1725.08	1723.92					95.627	-0.199026	1769.21	1770.07					95.627	1.39303	1801.33	1795.94
95.6782	0.630079	1978.87	1977.14					95.6782	-0.42765	1922.7	1924.04					95.6782	0.33296	1725.95	1724.8					95.6782	-0.0523751	1769.09	1769.31					95.6782	1.20214	1800.61	1795.96
95.7295	0.694678	1979.27	1976.35					95.7295	-0.54425	1922.77	1924.48					95.7295	0.388047	1725.77	1724.85					95.7295	0.0392668	1768.42	1768.25					95.7295	0.813194	1799.47	1796.32
95.7808	0.360079	1978.53	1976.48					95.7808	-0.44832	1922.88	1924.29					95.7808	0.0594611	1725.23	1724.48					95.7808	0.0367358	1767.31	1767.15					95.7808	0.908671	1797.94	1794.44
95.832	0.101887	1977.52	1977.09					95.832	-0.4363	1922.66	1924.03					95.832	-0.0629695	1725.33	1725.04					95.832	-0.0602006	1766.66	1766.92					95.832	1.40628	1794.96	1789.54
95.8833	-0.0239	1977.56	1977.11					95.8833	-0.56475	1922.39	1924.17					95.8833	-0.0441197	1725.49	1725.54					95.8833	-0.11982	1766.49	1767.01					95.8833	1.121	1792.68	1788.36
95.9345	-0.01958	1977.78	1977.65					95.9345	-0.47389	1922.58	1924.07					95.9345	-0.165129	1725.16	1725.63					95.9345	-0.123433	1766.13	1766.66					95.9345	0.805041	1794.78	1791.67
95.9858	-0.00961	1977.31	1977.86					95.9858	-0.39542	1922.66	1923.9					95.9858	-0.25395	1725.15	1725.71					95.9858	-0.230557	1765.49	1766.49					95.9858	0.765386	1797.63	1794.67
96.0371	-0.02501	1976.58	1977.35					96.0371	-0.67991	1922.23	1924.37					96.0371	0.327955	1727.46	1725.99					96.0371	-0.204782	1765.73	1766.61					96.0371	0.572611	1798.3	1796.08
96.0883	-0.08715	1975.89	1976.68					96.0883	-0.64219	1922.85	1924.87					96.0883	1.6458	1731.9	1726.37					96.0883	-0.0615884	1766.46	1766.73					96.0883	0.437542	1798.69	1797
96.1396	-0.29075	1975.22	1976.24					96.1396	-0.21411	1924.13	1924.81					96.1396	2.73747	1735.79	1726.43					96.1396	0.0477222	1767.58	1767.37					96.1396	0.356921	1799.41	1798.02
96.1909	-0.36308	1974.63	1976.38					96.1909	-0.2269	1924.1	1924.81					96.1909	3.03217	1737.1	1726.68					96.1909	0.373253	1770.57	1768.94					96.1909	0.410091	1799.64	1798.05
96.2421	-0.25399	1974.83	1976.09					96.2421	-0.42992	1923.4	1924.76					96.2421	3.20828	1736.66	1727.01					96.2421	0.727252	1773.54	1770.38					96.2421	0.600524	1799.15	1796.83
96.2934	-0.07972	1976.25	1975.85					96.2934	-0.59109	1922.89	1924.75					96.2934	3.32184	1735.74	1725.99					96.2934	0.776044	1774.17	1770.79					96.2934	0.742883	1799.57	1796.7
96.3446	0.444923	1978.85	1976.57					96.3446	-0.72052	1922.33	1924.59					96.3446	3.49247	1735.99	1724.7					96.3446	0.610553	1772.66	1770					96.3446	0.888883	1801.67	1798.22
96.3959	1.10762	1981.51	1977.07					96.3959	-0.74614	1921.82	1924.17					96.3959	4.16249	1737.31	1724.39					96.3959	0.299665	1770.72	1769.42					96.3959	0.989668	1803.18	1799.35
96.4472	1.3272	1982.73	1977.06					96.4472	-0.9354	1921.79	1924.74					96.4472	4.37576	1736.8	1723.49					96.4472	-0.0003404	1770.38	1770.38					96.4472	0.690191	1802.47	1799.8
96.4984	1.26762	1983.01	1977.4					96.4984	-0.95006	1921.96	1924.95					96.4984	4.20574	1735.87	1722.28					96.4984	-0.135943	1770.61	1771.2					96.4984	0.344949	1801	1799.66
96.5497	1.21337	1982.72	1977.92					96.5497	-0.58024	1922.15	1923.97					96.5497	4.28186	1735.86	1721.92					96.5497	0.0127495	1770.41	1770.35					96.5497	0.355825	1800.04	1798.66
96.6009	1.10904	1981.82	1977.86					96.6009	-0.36858	1922.45	1923.61					96.6009	4.02291	1734.74	1721.66					96.6009	0.194521	1769.88	1769.04					96.6009	0.420383	1798.96	1797.33
96.6522	0.843998	1980.5	1977.37					96.6522	-0.55411	1922.24	1923.98					96.6522	3.37365	1733.16	1721.41					96.6522	0.173843	1768.89	1768.14					96.6522	0.302359	1797.42	1796.26
96.7035	0.540698	1979.44	1977.11					96.7035	-0.8182	1921.79	1924.36					96.7035	3.19341	1733.16	1721.97					96.7035	0.172203	1768.2	1767.45					96.7035	0.058098	1796.26	1796.04
96.7547	0.513181	1979.49	1977.27					96.7547	-0.7306	1921.86	1924.16					96.7547	3.59737	1733.99	1722.57					96.7547	-0.0303263	1767.61	1767.74					96.7547	-0.16327	1795.47	1796.1
96.806	0.476404	1979.22	1977.44					96.806	-0.5296	1922.37	1924.03					96.806	3.89575	1733.93	1722.06					96.806	-0.25611	1767.8	1768.92					96.806	-0.20004	1794.72	1795.5
96.8573	0.282845	1978.48	1977.31					96.8573	-0.70448	1922.23	1924.45					96.8573	3.73883	1732.66	1721.01					96.8573	-0.181448	1769.39	1770.18					96.8573	-0.1809	1794.2	1794.9
96.9085	0.273021	1978.39	1977.35					96.9085	-0.93728	1921.43	1924.38					96.9085	3.13385	1730.68	1720.27					96.9085	-0.0120625	1770.9	1770.95					96.9085	-0.10227	1794.03	1794.42
96.9598	0.312112	1978.04	1977.29					96.9598	-0.85074	1921.31	1923.98					96.9598	2.55359	1728.97	1720.3					96.9598	0.463995	1773.04	1771.02					96.9598	0.078665	1794.57	1794.27
97.011	0.417283	1977.94	1976.79					97.011	-0.5339	1922.09	1923.77					97.011	2.41528	1727.84	1720.51					97.011	1.19984	1776.42	1771.2					97.011	0.045684	1795.06	1794.88
97.0623	0.650476	1978.39	1976.27					97.0623	-0.25237	1923.03	1923.82					97.0623	2.71307	1727.41	1719.84					97.0623	1.7661	1779.45	1771.77					97.0623	-0.01177	1794.92	1794.97
97.1136	0.729063	1978.89	1975.78					97.1136	-0.09971	1923.27	1923.58					97.1136	3.09317	1727.66	1718.43					97.1136	1.84614	1780.87	1772.84					97.1136	0.181741	1794.91	1794.21
97.1648	0.791853	1979.65	1975.96					97.1648	-0.23152	1922.59	1923.32					97.1648	3.01542	1727.74	1717.43					97.1648	1.6869	1781.12	1773.77					97.1648	0.349688	1794.64	1793.29
97.2161	0.697386	1979.44	1976.48					97.2161	-0.50685	1922.13	1923.73					97.2161	2.77975	1727.5	1717.76					97.2161	1.75003	1781.39	1773.77					97.2161	0.184326	1793.88	1793.17
97.2674	0.473016	1978.45	1976.65					97.2674	-0.5229	1922.29	1923.94					97.2674	2.63489	1727.16	1718.3					97.2674	1.6888	1780.86	1773.51					97.2674	-0.07458	1793.98	1794.27
97.3186	0.738706	1978.23	1976.55					97.3186	-0.27729	1922.75	1923.62					97.3186	2.3402	1726.67	1718.44					97.3186	1.3368	1779.27	1773.45					97.3186	-0.25149	1794.29	1795.26
97.3699	0.97091	1977.78	1975.27					97.3699	-0.16458	1922.98	1923.5					97.3699	2.10538	1725.95	1718.92					97.3699	1.11884	1777.95	1773.08					97.3699	-0.26239	1794.79	1795.81
[truncated: 783 more rows]

## Sheet: 1f
Time (s)	CS1												Time (s)	CS2												Time (s)	CS3,4												Time (s)	CS5,6
	10L	13L	17L	18R	20L	21R	22R	23R	24R	25L	27R			10L	13L	17L	18R	20L	21R	22R	23R	24R	25L	27R			10L	13L	17L	18R	20L	21R	22R	23R	24R	25L	27R			10L	13L	17L	18R	20L	21R	22R	23R	24R	25L
-5	-0.29611	-0.12356	-0.13882	-0.18067	0.534969	0.018215	0.006156	0.327228	0.196569	-0.43802	-0.31761		-5	0.313261	-0.10446	-0.07588	-0.0077	-0.02552	-0.19825	-0.17999	-0.07661	-0.05305	-0.41605	0.001364		-5	-0.36577	-0.214108	0.270775	0.111162	0.10167	0.021119	-0.40752	-0.06976	-0.19784	0.104637	0.452421		-5	0.476028	-0.087	0.017094	0.0838	-0.0402	0.215801	-0.12008	-0.36005	-0.10791	-0.0578
-4.94876	-0.33884	-0.05684	-0.0783	-0.21349	0.493212	-0.16306	-0.10195	0.109851	0.48469	-0.46084	-0.12861		-4.94876	0.347307	-0.14191	-0.00873	0.06458	0.760863	-0.38009	0.078928	0.48186	0.307244	-0.35483	0.042052		-4.94876	-0.44389	-0.138143	0.208609	0.159273	-0.07301	0.181021	-0.47291	-0.1391	0.026113	-0.24029	-0.10637		-4.94876	0.495676	-0.21118	-0.32709	0.208992	-0.02398	0.157013	-0.30963	-0.08847	-0.19726	-0.11382
-4.89752	-0.26355	0.096584	-0.10348	-0.29157	0.6284	0.015695	-0.25295	0.19154	0.223248	-0.24772	0.142883		-4.89752	0.285278	0.14456	0.011907	0.004067	0.761332	-0.08156	-0.33586	0.000582	0.303171	-0.03217	0.442086		-4.89752	-0.26666	-0.272585	0.111474	0.022657	0.026329	0.144199	-0.45768	0.089866	-0.15993	-0.00189	0.021155		-4.89752	0.495461	-0.1762	-0.18518	0.172323	-0.15326	0.300233	-0.11189	-0.3367	-0.16476	0.078305
-4.84628	-0.54218	0.249074	-0.11272	-0.25808	0.369288	0.109253	-0.33621	0.286555	0.128121	-0.35455	0.006175		-4.84628	0.505832	-0.06987	0.012623	0.283529	0.967185	-0.09366	-0.29563	0.128474	1.12487	-0.00564	-0.29955		-4.84628	-0.2745	-0.247271	-0.18914	0.061376	0.157508	-0.02768	-0.52279	0.144734	-0.10538	-0.18697	0.001729		-4.84628	0.569834	-0.16468	0.238857	0.326823	-0.19674	0.277825	-0.18468	-0.09004	-0.11667	-0.21708
-4.79503	-0.58574	0.290091	0.077961	-0.0963	0.643163	-0.13252	-0.32272	-0.03151	0.102779	-0.18715	-0.14494		-4.79503	0.419986	0.06043	-0.04408	0.030263	0.84178	-0.21423	-0.5458	0.094566	1.02329	-0.28386	0.253089		-4.79503	-0.24419	-0.163871	0.04373	0.063531	-0.02005	-0.03096	-0.30806	0.276067	-0.02948	0.09646	0.209566		-4.79503	0.398958	-0.15749	0.371486	0.291663	-0.1219	0.339671	-0.29838	-0.19231	0.037132	-0.0568
-4.74379	-0.37827	0.579865	0.219538	-0.0226	0.527057	0.027972	-0.3788	-0.07544	-0.29473	-0.28734	0.031473		-4.74379	0.361793	0.049733	0.06466	-0.05911	0.532531	-0.12073	-0.36288	-0.07329	0.688206	-0.3491	-0.19361		-4.74379	-0.33439	0.14347	-0.00157	-0.09967	0.157983	0.324078	-0.48007	0.112449	-0.16228	0.298812	0.351381		-4.74379	0.504045	0.14656	-0.10522	0.135867	-0.10659	0.430058	-0.279	-0.18214	-0.05945	-0.03435
-4.69255	-0.53829	0.731012	-0.0568	0.056467	0.322799	-0.07122	-0.16898	-0.72348	0.220532	-0.35313	-0.42165		-4.69255	0.224297	-0.00925	-0.08995	-0.02635	0.460749	-0.24745	-0.4572	0.000741	0.325346	-0.34401	0.390152		-4.69255	-0.21716	0.135327	0.111492	0.08937	0.198242	0.207045	-0.40769	0.310077	-0.17954	0.161278	0.268442		-4.69255	0.605646	0.066327	-0.33979	0.170032	0.01228	0.465729	-0.2826	0.01412	0.083422	-0.38212
-4.64131	-0.49328	0.268177	-0.18777	-0.02452	0.637043	0.229313	-0.04994	-0.30043	-0.02296	-0.36838	0.023491		-4.64131	0.186057	-0.20258	-0.0436	-0.17735	0.303768	-0.26882	-0.29797	-0.26217	0.559611	-0.40162	0.095191		-4.64131	-0.16826	-0.00726922	0.00764	0.177359	0.185739	0.217815	-0.49287	0.330245	-0.23732	-0.0721	0.153613		-4.64131	0.517752	-0.27218	0.294313	0.206822	0.16207	0.377102	-0.30876	-0.12533	0.029504	-0.28622
-4.59007	-0.4354	0.125384	-0.25528	0.015637	0.398688	0.187619	-0.4458	-0.40073	0.201177	-0.48313	-0.1084		-4.59007	0.190068	-0.16101	0.05891	-0.10017	0.109708	-0.12655	-0.30268	-0.30108	0.004535	0.362743	-0.1078		-4.59007	-0.07801	-0.0194882	0.132437	0.118647	0.198338	0.123682	-0.4547	0.306766	-0.34101	-0.27631	0.003414		-4.59007	0.458329	-0.21811	0.153844	0.288887	-0.98123	0.217648	-0.2006	0.433566	-0.04244	-0.13548
-4.53883	-0.34359	0.465485	-0.26594	0.10102	0.695198	0.12212	-0.28296	-0.33724	0.128109	-0.0483	0.188871		-4.53883	0.010117	-0.13631	0.013943	-0.18208	0.471261	-0.15495	-0.25122	0.033799	0.308713	-0.58485	0.19062		-4.53883	-0.00869	0.00842815	0.487402	-0.01624	0.269834	0.130804	-0.48062	0.272225	0.218568	0.185913	0.126511		-4.53883	0.390885	-0.15838	0.445676	0.249275	-0.10039	0.163799	-0.45307	0.200862	0.007313	-0.13055
-4.48758	0.027584	-0.00849	-0.23237	0.202052	0.711458	-0.16607	-0.41204	-0.28719	0.130317	-0.13097	0.157754		-4.48758	-0.32507	-0.14777	0.088256	-0.19904	0.150743	-0.09159	-0.14184	-0.14267	0.230327	0.21813	0.38036		-4.48758	-0.08572	-0.0603519	-0.02755	-0.13344	0.327168	0.201789	-0.42491	0.050768	-0.40529	0.091612	0.080292		-4.48758	0.335494	-0.13915	-0.29908	0.137291	-0.03634	0.259947	-0.43595	0.316064	-0.05777	-0.10996
-4.43634	-0.0937	-0.08646	-0.2209	-0.04108	0.903733	0.350961	-0.24346	-0.3233	0.023206	-0.1795	-0.13992		-4.43634	-0.14246	0.010475	0.083054	-0.3601	0.315958	-0.31768	-0.30675	0.103534	0.046012	-0.61382	0.205753		-4.43634	-0.08897	-0.193601	0.068895	-0.22847	0.404528	0.142057	-0.33191	0.040543	0.002304	-0.13566	-0.26449		-4.43634	0.220444	-0.11828	-0.31345	0.178551	-0.33938	0.405316	-0.35731	-0.06849	-0.00424	-0.19132
-4.3851	-0.26375	0.382278	-0.14482	0.102955	0.586302	0.545263	-0.44052	-0.43903	-0.1558	-0.0261	-0.12243		-4.3851	-0.17009	-0.10064	0.106643	0.205534	0.086639	0.018611	0.087819	-0.02466	0.462694	-0.26877	0.137879		-4.3851	0.052905	0.0600603	0.027488	-0.12314	0.545783	0.110925	-0.33371	-0.11008	-0.1484	-0.34224	-0.12891		-4.3851	0.194861	-0.06846	0.052343	0.134208	0.130291	0.36662	-0.25958	0.030088	0.007611	-0.12037
-4.33386	-0.1033	0.730313	-0.32174	0.09526	0.447181	0.110668	-0.25928	-0.00577	0.081764	-0.11928	0.122824		-4.33386	-0.29119	0.153595	-0.14167	0.285692	0.673238	0.023389	-0.17339	0.405397	0.411761	-0.74259	-0.27867		-4.33386	-0.13679	0.129256	-0.03902	-0.25136	0.370456	0.04776	-0.32901	-0.25484	-0.04001	-0.41709	-0.32367		-4.33386	0.083163	0.12551	-0.04216	-0.00868	0.091742	0.580675	-0.3487	0.008633	0.016723	-0.18563
-4.28262	-0.05434	1.37974	0.04519	0.321453	0.834603	0.193751	-0.29057	-0.27445	-0.28235	-0.21161	-0.23858		-4.28262	-0.07019	-0.02648	0.042705	0.606171	0.41734	-0.12028	-0.0666	0.226417	0.125059	-0.30672	-0.01139		-4.28262	-0.05244	0.0970749	-0.0473	0.005446	0.437745	0.242119	-0.34611	-0.31823	0.142427	-0.21735	0.198638		-4.28262	0.013861	0.147425	-0.12323	0.125441	0.173781	0.417728	-0.1532	0.046044	0.080466	0.09121
-4.23138	-0.13034	1.73769	-0.11184	0.37325	0.973112	0.165023	-0.31996	-0.42748	-0.03502	-0.63075	-0.16012		-4.23138	-0.09136	0.191126	0.173598	0.19193	0.56376	-0.23312	-0.00407	0.194732	-0.05287	-0.04141	0.167266		-4.23138	-0.16556	0.166314	-0.16949	0.029784	0.123754	0.25307	-0.44796	-0.37179	0.020953	0.225438	0.028565		-4.23138	0.072153	-0.04682	-0.13498	0.09327	0.198239	0.41082	-0.28186	-0.08411	0.073281	-0.03048
-4.18013	-0.08976	1.39671	-0.03115	0.225054	1.34129	0.268478	-0.35695	-0.25208	0.129673	-0.22674	-0.18745		-4.18013	-0.09724	-0.0941	0.338395	0.048729	0.55202	-0.14014	-0.19565	0.021257	-0.30628	-0.14883	0.59131		-4.18013	-0.18392	0.102509	-0.01948	0.175049	0.235148	0.135242	-0.35288	-0.16829	0.07686	-0.26133	-0.00073		-4.18013	-0.01699	0.284014	-0.43557	-0.04335	0.152197	0.276828	-0.07518	-0.05777	0.017298	-0.17723
-4.12889	-0.51466	1.27417	-0.21494	0.203578	0.989212	0.163627	-0.55233	-0.46753	0.005045	-0.26287	-0.00016		-4.12889	0.031384	-0.04277	0.346464	-0.22194	0.544788	-0.30596	-0.18102	-0.27847	0.051445	-0.44412	0.144879		-4.12889	0.040106	0.213467	-0.05662	0.144327	-0.09937	0.151732	-0.51553	-0.2825	-0.0905	-0.26452	0.038512		-4.12889	0.054524	-0.08785	-0.04882	0.056591	0.234237	0.122402	-0.46188	-0.03146	0.103786	-0.05204
-4.07765	-0.44445	1.31671	-0.18657	0.15612	0.759739	0.273387	-0.45662	-0.42609	-0.30004	0.348582	-0.23037		-4.07765	-0.29211	-0.18017	0.28452	-0.09746	0.342475	-0.3001	-0.50819	-0.07143	0.256573	-0.11028	-0.13331		-4.07765	0.034455	-0.0127599	0.000392	0.068405	0.056211	0.224466	-0.38101	-0.29545	-0.04298	-0.37146	-0.06852		-4.07765	-0.03321	-0.06209	-0.1894	0.236775	0.051401	0.361931	-0.43769	0.206245	-0.01124	-0.14864
-4.02641	-0.35191	0.739689	-0.24023	0.163127	0.4721	-0.11304	-0.21369	-0.19075	-0.13609	-0.09179	-0.10231		-4.02641	-0.06367	-0.29532	0.47031	-0.31339	0.194453	-0.39857	-0.2012	0.059404	0.258502	-0.05983	-0.22759		-4.02641	0.227244	0.00329424	-0.01598	-0.08364	0.105821	0.257863	-0.40949	-0.14128	-0.18334	-0.09088	0.038305		-4.02641	-0.10649	-0.02494	-0.21705	0.41987	0.008291	0.500678	-0.23404	0.088911	0.149637	-0.03708
-3.97517	-0.46836	0.587609	-0.2806	0.016336	0.452446	0.213413	0.178014	-0.49784	0.274044	0.062576	-0.1132		-3.97517	-0.19438	0.102721	0.320573	-0.24369	0.219539	-0.25425	-0.33912	-0.33816	0.11502	0.012039	0.429198		-3.97517	0.031165	0.367968	-0.05081	-0.11561	0.187162	0.414113	-0.41244	-0.01283	-0.09805	-0.32957	-0.07599		-3.97517	0.016136	0.006637	-0.14232	0.632133	0.110433	0.479512	-0.16245	0.108828	0.128087	-0.11482
-3.92393	-0.46697	-0.01346	-0.07218	0.163077	0.483486	0.031277	-0.25336	-0.52628	0.499263	-0.38164	-0.34431		-3.92393	0.103724	0.078955	0.166499	-0.05953	0.40003	-0.28557	-0.14504	-0.44889	0.180647	-0.18728	0.187056		-3.92393	0.09565	0.511646	-0.23198	0.028586	0.293544	0.337531	-0.42293	-0.02611	0.017573	0.121369	-0.02155		-3.92393	0.028067	0.13221	0.320605	0.488533	-0.07375	0.374255	-0.35848	-0.19174	0.106154	-0.08863
-3.87268	-0.53688	0.393972	-0.15353	0.054808	0.887431	0.223333	-0.13389	-0.29089	0.364198	0.240165	-0.02928		-3.87268	-0.13177	0.122491	0.275469	-0.11285	0.282575	-0.18779	-0.71622	-0.25164	0.303671	-0.29256	0.019937		-3.87268	0.22403	0.32475	-0.00604	-0.04526	0.421261	0.417297	-0.3878	0.068442	-0.14149	0.093639	0.34834		-3.87268	0.003443	0.006257	-0.00174	0.448972	-0.05025	0.353268	-0.13604	-0.26992	-0.02709	0.151205
-3.82144	-0.45439	0.232568	-0.41459	0.13072	0.834312	0.004153	-0.32056	-0.43684	0.355415	-0.26537	-0.06451		-3.82144	-0.13795	0.010381	0.588902	-0.10959	0.092274	-0.48854	-0.23426	-0.18354	-0.28683	-0.22376	0.183247		-3.82144	0.270044	0.307445	-0.25714	-0.13346	0.279134	0.068393	-0.38691	-0.12681	-0.17292	0.20963	-0.34078		-3.82144	-0.07174	0.272344	0.21382	0.280198	0.176395	0.231549	-0.03724	-0.23501	-0.00543	0.103833
-3.7702	-0.27389	0.411923	-0.24496	-0.0794	0.497561	0.088369	-0.1903	-0.24468	-0.08157	-0.22817	0.042986		-3.7702	-0.24312	0.190078	0.464819	-0.17032	0.001175	-0.30797	-0.01519	-0.37901	0.370722	-0.03179	0.00082		-3.7702	0.374338	0.113771	-0.18991	-0.18382	0.345657	-0.02738	-0.46149	0.052832	-0.12724	-0.13209	-0.02193		-3.7702	-0.07387	0.133689	-0.31307	0.296136	0.153787	0.416167	-0.22637	-0.35566	-0.03155	0.124519
-3.71896	-0.20073	0.253114	-0.06488	0.11627	0.836044	0.411596	-0.25937	-0.59872	0.045696	-0.39867	0.035061		-3.71896	-0.02037	0.148792	0.296095	0.086426	0.176269	-0.26642	0.088082	-0.14886	-0.60131	-0.07956	-0.06572		-3.71896	0.397536	-0.0565748	-0.07829	-0.18687	0.278719	0.156439	-0.37417	0.014132	-0.16764	-0.03035	-0.09853		-3.71896	-0.12559	0.297704	-0.11951	0.291431	0.248007	0.227117	-0.28936	0.034739	-0.02582	-0.16291
-3.66772	-0.18629	0.138289	-0.15684	0.052813	0.911978	0.051475	-0.2186	-0.56015	-0.05254	-0.31267	-0.12364		-3.66772	-0.07252	0.028535	0.414804	0.313289	-0.05313	-0.06665	0.111876	-0.46436	0.043751	-0.25455	0.355177		-3.66772	0.500703	0.224609	-0.13251	-0.049	0.160315	0.157018	-0.25119	-0.01392	0.017767	0.07009	0.084764		-3.66772	-0.1507	0.228103	-0.01477	0.279137	0.096799	0.227832	-0.38666	-0.09165	-0.10252	-0.21579
-3.61648	-0.28245	-0.05236	0.004601	0.034318	0.649728	-0.01722	-0.18082	-0.83262	-0.11722	-0.22817	-0.29661		-3.61648	-0.28488	-0.04825	0.398925	0.143923	-0.07324	-0.08407	0.441207	-0.78513	-0.13918	-0.23494	0.276466		-3.61648	0.445668	0.113667	-0.24087	-0.04252	0.309327	-0.00683	-0.38399	0.080997	-0.05144	0.032045	0.089192		-3.61648	-0.07646	0.108656	-0.25387	0.178273	0.148812	0.276796	-0.25911	-0.33866	-0.08593	-0.11823
-3.56523	-0.31515	0.011613	-0.00549	0.346964	0.52868	-0.2512	-0.36433	-0.41135	-0.03811	-0.34807	-0.29339		-3.56523	-0.13567	0.130048	0.318325	0.19451	-0.03801	-0.0413	0.464182	-0.58859	0.145549	-0.03464	0.616978		-3.56523	0.320346	0.0906527	-0.23569	-0.14436	0.189843	0.294296	-0.29501	0.368584	0.087579	-0.83399	-0.23512		-3.56523	-0.06566	0.090956	0.370534	0.049206	0.387535	0.099613	-0.28202	-0.21273	-0.13274	-0.24302
-3.51399	-0.20417	-0.00131	-0.11256	0.469423	0.678025	-0.16214	-0.44839	-0.39118	-0.09308	-0.01511	-0.08633		-3.51399	-0.05587	-0.09709	0.4	-0.01263	0.023194	-0.12012	0.53418	-0.46632	0.028882	-0.30775	0.408735		-3.51399	0.334883	0.158544	-0.19327	-0.11834	0.225626	0.157018	-0.38145	0.248175	-0.00023	0.030172	0.074049		-3.51399	-0.11907	0.145786	-0.14785	0.10735	0.168053	0.012768	-0.19386	-0.34309	-0.02429	-0.16933
-3.46275	-0.19896	-0.09326	-0.08759	0.364203	0.737115	-0.17513	-0.30207	-0.32398	0.073223	0.038798	-0.19143		-3.46275	-0.22419	0.032713	0.418583	-0.2313	-0.00212	0.176364	0.212692	-0.52128	-0.50775	-0.29247	0.130964		-3.46275	0.379475	0.0535091	-0.14345	-0.08604	0.17681	0.203009	-0.21501	0.158144	-0.07627	-0.61483	-0.32699		-3.46275	-0.14891	0.044338	-0.14687	0.433954	0.136291	0.110142	-0.24348	0.043266	-0.10414	-0.12929
-3.41151	-0.25487	0.011246	-0.14513	0.423476	0.390029	-0.07784	-0.29382	-0.55361	-0.27825	-0.11617	-0.06355		-3.41151	-0.22327	0.018624	0.491075	-0.30507	0.204356	-0.05719	-0.13435	-0.07416	-0.19241	-0.38259	0.286121		-3.41151	0.535455	0.242421	-0.1764	-0.16977	0.081255	0.230573	-0.22198	-0.14454	-0.118	0.022432	-0.16747		-3.41151	-0.19732	-0.01037	0.087952	0.468412	0.13387	-0.07846	0.050939	-0.11544	0.098246	-0.16258
-3.36027	-0.17416	-0.03322	-0.08631	0.584388	0.821	-0.42604	-0.45073	-0.27079	-0.11196	0.117377	-0.06188		-3.36027	-0.20561	-0.07814	0.246881	-0.31908	0.487152	-0.38056	-0.03872	-0.22986	-0.2513	-0.17878	0.218965		-3.36027	0.40004	0.0512239	-0.21834	-0.09655	0.03457	0.084542	-0.07206	-0.12092	-0.07447	-0.16966	-0.25439		-3.36027	-0.2655	-0.07263	0.039721	0.370896	0.2979	0.062331	-0.15329	-0.31535	0.128616	-0.24014
-3.30903	-0.35216	0.055745	0.089026	0.549373	1.09979	-0.34588	-0.23215	-0.32606	-0.14744	0.073501	-0.08266		-3.30903	-0.11778	0.072896	0.338218	-0.11924	0.429429	-0.38258	-0.11202	-0.68703	-0.0417	-0.27196	0.06639		-3.30903	0.418016	0.128817	-0.23191	0.11892	0.073372	0.331749	-0.05148	-0.20245	-0.02817	-0.26592	-0.24032		-3.30903	-0.23113	0.004205	-0.79563	0.311512	0.216197	0.117715	-0.21653	0.114937	-0.03184	-0.1365
-3.25778	-0.28473	0.182606	0.066743	0.50578	0.816758	-0.58651	-0.24613	-0.48479	-0.39233	-0.39883	-0.24872		-3.25778	-0.2144	-0.03841	0.345099	-0.01752	0.691877	-0.2558	-0.05438	-0.48462	-0.35714	-0.53789	0.439005		-3.25778	0.379003	0.106259	-0.15061	0.260932	0.230975	0.330629	-0.33602	-0.21977	-0.27073	-0.29878	0.002677		-3.25778	-0.16452	0.082376	-0.52859	0.373306	0.151289	0.068709	-0.1714	-0.46411	0.032901	-0.21389
-3.20654	-0.44518	-0.27073	-0.222	0.486787	0.478059	-0.6604	-0.45418	-0.40424	0.276718	-0.03228	0.180417		-3.20654	-0.12252	0.036485	-0.03315	-0.04753	0.648735	-0.36997	-0.2076	-0.4891	-0.28949	-0.28193	0.683738		-3.20654	0.289056	0.199306	-0.19791	0.280956	-0.04048	0.32176	-0.30501	-0.25355	0.181455	-0.30719	-0.00604		-3.20654	-0.10259	0.198287	0.216296	0.151655	0.023955	0.060234	-0.09203	-0.08096	-0.10646	-0.36862
-3.1553	-0.38181	-0.28618	-0.26614	0.28377	0.474128	-0.58708	-0.28033	-0.54895	0.008051	-0.03391	0.218735		-3.1553	-0.13739	0.035271	0.043423	-0.04339	0.725089	-0.43789	-0.05976	0.119355	-0.07068	-0.30451	0.556838		-3.1553	0.185476	0.0890911	-0.0371	0.113727	0.460567	0.511955	-0.32513	-0.24962	0.032382	-0.27787	-0.01942		-3.1553	-0.14923	-0.00177	0.010386	0.278927	0.019423	0.039266	-0.1282	-0.35741	-0.01835	-0.24303
-3.10406	-0.3426	0.098354	-0.25317	0.592685	0.800485	-0.25651	-0.25584	-0.64935	-0.30335	-0.33231	0.526945		-3.10406	-0.07172	-0.03437	0.034695	0.171605	0.890185	-0.18329	0.017153	-0.55138	-0.42264	-0.18407	0.125732		-3.10406	0.243398	0.323286	-0.14937	0.026945	0.318587	0.402478	-0.36474	-0.39696	-0.00915	-0.04279	0.215486		-3.10406	-0.1099	0.04079	0.174734	0.370806	0.190116	0.035461	-0.12332	-0.34049	-0.02274	-0.23451
-3.05282	-0.20384	0.081732	-0.186	0.565806	0.611775	-0.3209	-0.02112	-0.01699	-0.35412	-0.26351	0.298498		-3.05282	-0.28654	-0.05702	0.07257	-0.08189	0.817986	-0.54876	0.086863	-0.76838	-0.15317	-0.24955	0.544642		-3.05282	0.191332	0.294333	-0.06625	-0.08983	0.213247	0.539975	-0.23376	-0.20761	0.073786	-0.18668	0.028828		-3.05282	-0.16813	0.162007	-0.88583	0.535631	0.165493	-0.04573	-0.08411	-0.26616	-0.07426	-0.20687
-3.00158	-0.37079	-0.10153	-0.09518	0.653876	0.740179	-0.0144	-0.13558	-0.1876	-0.36778	0.149972	0.414454		-3.00158	-0.36926	-0.25292	0.093762	-0.14423	0.690005	-0.27823	0.241564	-0.27237	-0.17267	-0.26931	-0.08985		-3.00158	0.121931	0.384667	-0.19555	-0.11388	0.156267	0.306144	-0.07091	-0.199	0.116111	-0.33581	0.296454		-3.00158	-0.11251	0.136233	0.018024	0.562094	0.118243	-0.05272	0.102005	0.184322	-0.08506	-0.44012
-2.95034	-0.53911	0.021826	-0.12701	0.698554	0.670757	-0.40422	-0.155	-0.10603	1.02696	-0.0777	0.161255		-2.95034	-0.1823	-0.1759	0.131294	0.080093	0.484256	-0.22569	-0.25899	-0.20542	-0.28219	0.162222	-0.11521		-2.95034	0.071893	0.16219	-0.16522	-0.20455	0.348137	0.546907	-0.25633	-0.11315	0.056712	-0.1643	0.17447		-2.95034	-0.13959	0.082788	-0.14027	0.616873	0.055552	-0.12983	0.08547	-0.08376	-0.14078	-0.37023
-2.89909	-0.36451	0.1042	-0.03328	0.613253	1.02268	-0.24873	0.121449	-0.04002	-0.31615	-0.29158	0.078352		-2.89909	-0.22313	-0.45669	-0.07401	0.129545	0.003939	-0.36612	-0.0765	-0.53475	-0.26941	-0.29729	-0.05636		-2.89909	0.214177	0.0410795	-0.25688	-0.1256	0.149554	0.468178	-0.23205	-0.17882	0.161543	0.011612	-0.07477		-2.89909	-0.09319	0.051573	0.374945	0.468149	0.004159	0.011634	0.024099	-0.12371	-0.07175	-0.44972
-2.84785	-0.43279	0.23158	-0.192	0.774606	0.633403	-0.14078	-0.13179	-0.12516	0.265912	-0.14	0.013356		-2.84785	-0.16302	0.222269	0.129357	0.161048	0.528757	-0.15491	-0.03979	-0.44778	-0.42361	-0.07596	0.030457		-2.84785	0.155204	0.0882636	-0.2211	-0.0103	0.36622	0.386988	-0.32542	-0.07882	0.140933	-0.29237	0.189284		-2.84785	0.030884	0.158277	-0.1636	0.486545	0.06969	0.00108	-0.20191	-0.06711	-0.00499	-0.3234
-2.79661	-0.44056	0.220461	-0.13579	0.651462	0.667602	-0.26546	0.008344	-0.12508	0.77769	-0.11703	0.166575		-2.79661	-0.06566	-0.29488	0.084932	0.056788	0.434568	-0.33601	-0.02768	-0.2443	0.243092	-0.35575	-0.24084		-2.79661	0.158742	0.21866	-0.31337	0.132777	0.153189	0.315881	-0.32091	-0.2482	-0.04345	-0.08497	0.203896		-2.79661	0.006472	0.194028	0.200504	0.294173	0.013611	0.141671	-0.09586	-0.0069	0.016535	-0.33788
-2.74537	-0.42878	-0.20354	-0.1245	0.406643	0.118346	-0.37921	0.014209	-0.39399	0.25477	-0.27582	0.005834		-2.74537	0.09143	-0.32843	0.144066	0.068408	0.353266	-0.46849	0.007504	-0.07102	-0.28021	-0.12749	-0.14784		-2.74537	0.084203	0.0442928	-0.2836	0.098619	0.380304	0.235466	-0.23244	0.00425	-0.08429	-0.31684	0.432976		-2.74537	0.02774	0.006709	0.547433	0.4268	0.027553	0.00763	-0.26199	-0.28624	-0.09011	-0.39036
-2.69413	-0.51618	-0.21059	-0.02426	0.248424	0.117867	-0.04147	0.104972	0.047972	0.566715	0.038139	-0.15838		-2.69413	-0.07242	-0.30146	0.033267	0.01147	0.519176	-0.5696	-0.02607	0.085155	-0.06068	-0.32886	0.309386		-2.69413	0.137593	0.165945	-0.18298	0.236811	0.23527	0.3518	-0.3721	-0.11598	-0.08919	-0.06259	-0.0782		-2.69413	-0.07241	-0.012	0.288766	0.413967	-0.04634	0.16042	-0.36956	-0.1376	-0.03188	-0.44977
-2.64289	-0.50627	-0.09523	0.040321	0.488952	-0.20645	-0.15744	-0.08567	-0.05017	-0.44519	0.111779	-0.17534		-2.64289	0.041406	-0.05264	-0.12363	-0.05527	0.609864	-0.37521	0.411126	-0.19476	0.159852	-0.12618	0.227963		-2.64289	0.094089	0.0555087	-0.30508	0.325161	0.104942	0.247633	-0.40181	-0.11474	-0.16744	-0.03437	0.126773		-2.64289	-0.07394	-0.04982	0.154328	0.554539	-0.06259	0.133741	-0.26693	-0.30763	-0.05634	-0.43785
-2.59164	-0.24787	0.113758	-0.03044	0.958943	-0.09351	-0.04909	-0.10564	-0.29419	0.652136	0.014182	0.012962		-2.59164	0.065028	-0.09578	-0.05343	-0.04094	0.64979	-0.25942	0.003956	0.114098	-0.75209	-0.54736	-0.29755		-2.59164	0.137458	0.0886713	-0.40081	0.328845	0.110224	0.215701	-0.54171	-0.2082	-0.11565	-0.02765	-0.31753		-2.59164	-0.14406	0.060827	-0.24701	0.409802	0.047223	0.12602	-0.22832	-0.09592	-0.08453	-0.48842
-2.5404	-0.44391	-0.38283	-0.07608	0.957233	-0.00827	0.169995	-0.12708	-0.12841	-0.24809	-0.10351	-0.05796		-2.5404	-0.14869	-0.42577	0.001245	-0.29888	0.618139	-0.52693	-0.2206	0.185357	0.442683	-6.5e-05	0.433842		-2.5404	0.175626	0.221545	-0.29396	0.309846	0.044363	-0.05569	-0.43172	-0.25865	-0.28737	0.160876	-0.02626		-2.5404	0.055536	0.218676	-0.39931	0.367026	0.002624	0.195638	-0.32509	-0.18909	0.066398	-0.32387
-2.48916	-0.38997	-0.00631	-0.1809	0.405042	0.091739	0.04337	-0.00146	-0.20231	-0.17571	-0.19391	0.240906		-2.48916	0.20357	-0.13538	0.092785	-0.21152	0.518142	-0.39357	0.062566	-0.16426	-0.12308	-0.46414	-0.15611		-2.48916	0.104915	0.216079	-0.3662	0.245633	0.047446	0.314737	-0.55	-0.18233	-0.21886	0.052317	0.140946		-2.48916	-0.02107	0.212206	-0.14656	0.428456	-0.02036	-0.00547	-0.42766	-0.21989	-0.02742	-0.40424
-2.43792	-0.4909	0.086295	-0.05383	0.275058	-0.08301	-0.14642	0.003764	-0.02281	-0.02678	0.004184	0.122119		-2.43792	0.226481	0.022378	0.174027	0.019951	0.255034	-0.41432	-0.21347	-0.27185	-0.08222	-0.61591	0.624062		-2.43792	0.030365	0.1646	-0.26968	0.161926	0.111702	0.218084	-0.44665	-0.1873	-0.16906	0.037578	-0.00822		-2.43792	-0.04455	0.125302	-0.84684	0.410102	0.094713	0.136873	-0.34766	-0.18815	-0.00644	-0.23145
-2.38668	-0.58211	0.148427	-0.07622	0.163197	-0.14493	-0.14789	0.048558	0.001174	0.254512	0.136294	0.061849		-2.38668	0.389418	-0.62822	0.012297	-0.36536	0.189134	-0.2361	0.129209	-0.24826	-0.2591	-0.43027	0.114795		-2.38668	0.017879	0.09573	-0.23691	0.016092	0.142867	0.228585	-0.30332	-0.28571	-0.14706	0.329559	-0.03021		-2.38668	-0.04493	0.025244	-0.2526	0.2334	0.248338	-0.05588	-0.37542	-0.3418	0.083218	-0.1528
-2.33544	-0.27406	0.051368	-0.06762	-0.09476	0.025467	-0.23625	0.167962	0.121697	-0.72838	0.015214	-0.02723		-2.33544	0.251725	0.105113	0.059209	-0.10554	-0.16224	-0.15293	0.206687	0.015982	0.062431	-0.60834	0.304822		-2.33544	-0.07094	0.163616	-0.32069	0.018219	0.15589	0.164628	-0.24164	-0.13523	-0.10929	0.034547	0.068008		-2.33544	-0.06075	0.02449	0.372302	0.020313	0.323557	0.218442	-0.40782	-0.29772	0.100527	-0.27557
-2.28419	-0.23339	-0.19781	0.104596	0.264825	0.041158	-0.20888	0.03881	0.076865	0.192245	0.135325	0.401917		-2.28419	0.221599	0.012986	-0.08091	-0.09528	-0.19518	-0.04884	0.126648	-0.16603	-0.25883	-0.19642	-0.16015		-2.28419	-0.0701	0.299434	-0.31621	-0.00746	0.335527	0.206258	-0.2297	-0.33361	-0.13379	0.141257	0.071898		-2.28419	-0.05398	0.120853	0.366319	0.144022	0.106494	0.0663	-0.27152	-0.24833	0.071877	-0.11671
-2.23295	-0.28074	-0.09824	-0.07389	0.391596	0.103473	0.310226	-0.0342	-0.07134	-0.10579	-0.00746	0.474784		-2.23295	0.139469	0.241248	-0.09431	0.088844	-0.3057	-0.18148	0.270918	-0.33785	0.403727	-0.01622	-0.2537		-2.23295	-0.072	0.21558	-0.25695	0.087537	0.142485	0.071159	-0.18959	-0.30511	-0.05053	-0.18053	0.075842		-2.23295	-0.02613	0.018922	0.158935	0.094122	0.121677	0.317324	-0.09416	-0.28504	0.136866	-0.37877
-2.18171	-0.17842	0.081778	-0.10346	0.716314	0.178295	0.353833	-0.01524	-0.46006	0.692023	0.019773	0.325499		-2.18171	-0.05333	-0.42626	-0.09127	0.084094	0.214624	-0.38814	0.109206	-0.40306	-0.03045	-0.20956	-0.16808		-2.18171	-0.03655	0.0504325	-0.24488	0.104068	0.318487	0.0481	-0.31315	-0.0814	0.115416	-0.0566	-0.00508		-2.18171	-0.01449	0.067613	-0.24417	0.133122	0.23725	-0.05194	-0.26596	-0.32494	0.157613	-0.19727
-2.13047	-0.01148	0.173456	0.082199	0.655799	-0.16931	0.265699	0.10063	-0.15426	0.599087	0.306882	-0.08291		-2.13047	0.140178	-0.30047	-0.12741	0.247053	0.085991	-0.29405	0.096639	-0.22372	-0.03585	-0.31791	0.528899		-2.13047	0.043398	0.149062	-0.29224	0.040211	0.263861	0.034522	-0.12639	-0.26721	0.248611	0.021798	0.517426		-2.13047	-0.00627	0.123449	0.095682	0.220797	0.173994	0.02718	-0.11804	0.005779	0.155441	-0.06909
-2.07923	-0.22636	0.001677	0.065896	0.777772	-0.08148	0.462525	0.173735	-0.43617	0.042594	0.077704	-0.11656		-2.07923	0.11609	-0.05809	0.001291	0.22681	0.244908	-0.45943	0.064396	-0.08402	-0.13552	-0.0198	-0.37156		-2.07923	0.041384	0.0939744	-0.23683	0.121611	0.092437	-0.06406	-0.16027	-0.24043	0.461516	0.067532	0.207499		-2.07923	0.059054	0.086891	-0.1929	0.300948	0.073684	0.228459	-0.12733	-0.51038	0.036975	-0.33409
-2.02799	-0.26725	0.26875	-0.10072	0.631746	-0.19093	0.264012	0.192454	-0.19565	0.413467	0.251801	-0.02822		-2.02799	-0.0625	0.05793	0.010499	-0.10172	-0.0347	-0.36048	0.015951	-0.123	-0.41268	-0.18585	0.7883		-2.02799	0.083379	0.275284	-0.41061	0.426742	0.070185	-0.00392	-0.20784	-0.16016	-0.09921	0.096451	0.387951		-2.02799	-0.02942	0.314792	0.224508	0.252496	0.173952	0.213133	-0.16051	0.075573	0.006352	-0.33599
-1.97674	-0.25883	0.294394	-0.06208	0.365909	-0.4163	0.442756	-0.02593	-0.54103	0.041227	0.039554	-0.35721		-1.97674	-0.2585	0.126263	-0.07106	-0.08923	0.002483	-0.27072	-0.21546	-0.20303	0.035336	-0.24148	0.262695		-1.97674	0.065795	0.352037	-0.15864	0.533584	-0.03016	-0.0079	-0.27686	-0.43629	0.151602	-0.09782	0.309703		-1.97674	-0.03051	0.447723	0.206831	0.231521	0.223821	0.122924	-0.03123	-0.25612	0.132741	-0.31617
-1.9255	-0.35456	0.037122	-0.25687	0.433062	-0.00786	0.138782	-0.10363	-0.44701	-0.3301	0.099115	0.076129		-1.9255	-0.14191	0.348366	-0.00997	-0.1255	0.110941	-0.46306	-0.43737	-0.71802	-0.5103	0.023376	0.002608		-1.9255	-0.02139	0.320603	-0.27084	0.367567	0.17931	0.088633	-0.21545	-0.13086	0.198959	0.09828	0.158746		-1.9255	-0.01838	0.505025	0.00394	0.113268	0.21408	0.116902	-0.38699	-0.23489	-0.08821	-0.1632
-1.87426	-0.20243	0.116177	-0.00995	0.612976	-0.25698	0.156977	-0.15774	0.132581	0.305447	-0.03426	0.303576		-1.87426	-0.08506	0.32105	-0.00173	-0.06853	0.22226	-0.21044	-0.29193	-0.50546	-0.37982	0.065894	0.597418		-1.87426	-0.00872	0.0467709	-0.27904	0.275354	-0.08787	-0.16241	-0.29241	-0.24336	0.018396	-0.25282	-0.20181		-1.87426	-0.08787	0.379243	0.297544	0.270589	-0.1555	0.09083	-0.1029	-0.27541	0.025653	-0.22802
-1.82302	-0.18343	0.016607	0.126956	0.528249	0.333798	-0.00638	-0.16655	-0.41989	-0.04867	0.207634	0.504284		-1.82302	-0.36932	0.212695	-0.03583	-0.05143	0.181499	-0.28615	-0.18196	-0.51927	-0.49605	0.142954	0.395723		-1.82302	-0.05255	0.00355065	-0.05742	0.367726	0.290914	0.083073	-0.27524	-0.29825	0.133306	-0.14417	0.074277		-1.82302	-0.15184	0.193006	0.310565	0.09118	0.047111	0.175515	-0.3217	-0.2442	0.025702	-0.25487
-1.77178	-0.33162	0.288009	0.374883	0.550035	0.40971	0.116593	-0.11867	-0.3301	0.713666	-0.30396	0.407245		-1.77178	-0.23052	0.094032	0.299003	-0.00467	0.074589	-0.57831	-0.16641	-0.29169	-0.27267	0.587378	0.298743		-1.77178	0.078457	0.368447	-0.20615	0.219125	0.364088	-0.06462	-0.3315	-0.44758	-0.03438	0.003617	0.119216		-1.77178	-0.05056	0.218362	-0.62822	0.195362	-0.01901	0.080558	-0.15455	-0.55467	-0.00822	-0.15671
-1.72054	-0.17701	0.409152	0.245569	0.390544	0.115101	0.061696	-0.15712	-0.19859	0.119119	-0.15101	0.395486		-1.72054	-0.27216	0.179543	0.255678	0.457449	0.509677	-0.308	-0.56263	-0.39851	-0.23891	0.450139	0.546224		-1.72054	-0.02213	0.259368	-0.22105	0.284313	0.196631	-0.06705	-0.46086	-0.12776	0.249899	-0.29381	0.031232		-1.72054	-0.1281	0.124082	0.388194	0.319664	0.019237	0.131633	-0.24194	-0.26197	-0.07704	-0.15741
-1.66929	-0.10866	-0.20583	-0.03189	0.246414	0.433955	-0.05131	-0.26957	-0.17035	-0.00775	-0.16212	-0.03805		-1.66929	-0.20897	0.281801	0.190255	0.505038	0.245632	-0.27248	-0.19587	-0.64202	-0.14821	0.311109	0.474034		-1.66929	-0.15846	0.126684	-0.18252	0.371218	0.179754	0.095981	-0.5123	-0.35423	0.104013	-0.16466	0.096111		-1.66929	-0.06329	0.079531	-0.21101	0.355581	-0.21944	0.049521	-0.29287	-0.37069	-0.16327	-0.16713
-1.61805	0.243168	-0.12435	0.053258	0.097603	0.032047	0.148049	-0.17701	-0.14677	0.371933	-0.02117	0.181058		-1.61805	-0.11143	-0.01352	0.012836	0.512316	0.446236	-0.20274	-0.16258	-0.57595	-0.06104	0.510675	0.191201		-1.61805	-0.22415	0.0552366	-0.2446	0.364693	0.169908	-0.24285	-0.51499	-0.3325	0.142061	-0.00961	-0.10348		-1.61805	-0.06836	0.1217	0.017236	0.350198	-0.17825	0.221393	-0.427	-0.24864	-0.08882	-0.3451
-1.56681	0.08069	-0.10323	0.104711	0.214851	0.162208	-0.11602	0.031898	-0.18803	0.03	-0.23332	-0.26724		-1.56681	-0.12496	0.098822	0.167588	0.513855	0.481922	-0.31633	-0.09663	-0.40321	0.005329	0.060609	0.39652		-1.56681	-0.19097	0.260322	-0.28224	0.281725	0.0587	-0.22024	-0.39234	-0.42432	0.207565	0.154488	0.029712		-1.56681	-0.19965	0.101023	0.038349	0.276913	-0.16823	0.219434	-0.31392	0.006764	-0.04666	-0.10688
-1.51557	0.289237	0.437638	0.117279	0.160624	0.231276	0.048502	-0.2083	-0.30941	-0.14784	-0.02084	-0.02644		-1.51557	-0.38682	0.276754	0.151139	0.36647	0.677944	0.206454	-0.5419	-0.37273	-0.30375	0.15987	0.224848		-1.51557	-0.28607	0.302898	-0.196	0.324674	0.032753	-0.23589	-0.41255	-0.43711	-0.13538	0.085456	-0.02598		-1.51557	-0.14445	0.166456	-0.56038	0.397425	-0.19959	0.251654	-0.35034	0.085896	-0.04323	-0.39431
-1.46433	0.433668	0.060903	0.160743	0.342724	0.185283	-0.03174	-0.21078	-0.13243	0.030017	-0.18826	-0.22976		-1.46433	-0.27719	-0.00705	0.222925	0.383695	0.579021	0.249575	0.018974	-0.65095	-0.00446	0.405102	0.100093		-1.46433	-0.15676	0.169931	-0.09112	0.245191	0.101315	-0.3383	-0.36982	-0.25642	0.05682	0.092962	-0.26045		-1.46433	-0.1288	0.164899	0.407859	0.437492	-0.19769	0.198528	-0.58731	-0.25017	-0.00237	-0.33997
-1.41309	0.179783	0.352348	0.281769	0.581057	0.359372	0.281324	-0.16969	-0.11603	-0.23369	-0.2398	-0.1012		-1.41309	-0.15754	0.1894	0.381853	0.401488	0.171124	0.16012	-0.029	-0.46068	-0.33174	0.180822	0.02988		-1.41309	-0.1787	0.0297864	-0.08586	0.291043	0.206674	-0.3765	-0.29527	-0.32997	-0.08266	0.078216	0.297667		-1.41309	-0.20486	0.005237	-0.06374	0.506075	-0.05209	0.078495	-0.32744	0.069383	0.036016	-0.4735
-1.36184	0.270012	0.341476	0.106485	0.539221	0.509799	0.185635	0.025365	-0.39731	-0.10646	-0.20733	-0.36493		-1.36184	-0.33795	0.130006	0.249561	0.525096	-0.14194	0.069906	-0.41058	-0.04839	-0.55029	0.212563	0.545466		-1.36184	-0.13058	-0.0340315	-0.23	0.596838	0.327694	-0.41169	-0.49949	-0.2658	-0.06918	-0.05745	-0.15006		-1.36184	-0.08827	0.04905	0.193503	0.36713	-0.12689	0.080245	-0.45395	-0.13067	0.028206	-0.26323
-1.3106	0.198819	0.52953	0.138748	0.490295	0.834473	-0.07048	-0.07745	-0.34617	-0.04777	-0.13679	-0.24633		-1.3106	-0.41056	0.128169	0.088108	0.47634	0.010492	0.033204	-0.18022	-0.0373	0.086649	0.176913	0.078375		-1.3106	-0.24425	0.0128132	-0.1966	0.509386	0.569216	-0.2544	-0.33724	-0.35008	-0.0032	0.064842	0.072889		-1.3106	-0.13571	0.103922	-0.20509	0.342307	-0.12812	0.139722	-0.45989	-0.11661	-0.10323	-0.25007
-1.25936	-0.05163	0.033798	0.063807	0.401329	0.898669	0.335656	0.146973	-0.39734	0.033804	-0.375	-0.07209		-1.25936	-0.29094	0.099921	0.09313	0.458375	-0.03873	-0.35938	-0.07563	-0.18084	-0.26623	0.087842	0.256613		-1.25936	-0.25968	0.0890771	-0.12691	0.59321	0.272161	-0.26848	-0.36421	-0.26686	-0.06291	-0.34565	0.053187		-1.25936	-0.21371	0.053816	0.470097	0.380961	0.004783	0.20257	-0.58323	-0.05408	0.096638	-0.30911
-1.20812	-0.07005	0.068032	0.373244	0.341476	1.20228	0.07459	0.109048	-0.52439	-0.19684	-0.38176	-0.20511		-1.20812	-0.3736	0.137764	0.39404	0.122405	-0.45627	-0.29634	-0.0268	-0.0516	-0.16589	0.100214	0.072069		-1.20812	-0.08544	-0.119452	-0.20179	0.750123	0.381445	-0.22477	-0.27286	-0.35489	-0.13184	-0.18877	-0.18148		-1.20812	-0.2	0.021175	0.172354	0.364596	-0.00959	0.02063	-0.54891	-0.02514	0.131212	-0.16016
-1.15688	-0.21863	0.183505	0.086669	0.850479	1.28429	-0.02705	0.035642	-0.17424	-0.0275	-0.47943	-0.01242		-1.15688	-0.14254	0.13748	0.276701	0.157942	-0.38667	-0.36823	-0.46489	-0.16035	-0.81164	-0.02642	0.521135		-1.15688	-0.09454	0.104642	-0.09869	0.794472	0.11197	-0.15399	-0.21485	-0.26127	-0.151	-0.08578	0.086984		-1.15688	-0.20498	-0.13073	-0.54797	0.38021	-0.00243	0.22762	-0.40997	0.075885	0.042455	-0.21025
-1.10564	-0.13832	0.652165	-0.08879	0.704708	0.748141	0.017075	0.342054	-0.47214	-0.01114	-0.31766	0.096051		-1.10564	-0.26984	0.115949	0.457999	0.130213	-0.42285	-0.20593	-0.42891	-0.08901	-0.37317	-0.11506	-0.20401		-1.10564	-0.15018	0.0275386	-0.21007	0.885167	0.193564	-0.14378	-0.20527	-0.18296	-0.20337	-0.23691	0.143132		-1.10564	-0.17309	-0.01906	-0.47138	0.465526	-0.05107	0.165559	-0.27838	-0.04283	0.038631	-0.20255
-1.05439	-0.19044	0.812085	-0.12738	1.01196	0.748706	0.014139	0.548394	-0.29648	-0.19408	-0.34667	0.39132		-1.05439	-0.25032	0.11704	0.321027	0.236461	-0.24086	-0.3007	-0.02856	-0.11615	-0.44827	-0.04454	0.131187		-1.05439	-0.1406	0.295177	-0.26863	0.817299	0.030773	-0.0759	-0.17913	-0.01761	-0.06436	-0.22416	0.217934		-1.05439	-0.19609	0.087511	-0.36688	0.412701	0.167367	0.068437	-0.47603	0.048173	0.019505	-0.2288
-1.00315	-0.2065	0.627461	-0.10136	0.611281	1.09186	0.149198	0.523055	-0.36078	0.022164	-0.37502	0.131136		-1.00315	-0.40659	0.135705	0.273103	0.587028	-0.25572	-0.03109	-0.19095	-0.19063	0.141688	0.041466	-0.01293		-1.00315	-0.12576	0.16424	-0.2015	0.643481	-0.01784	-0.07704	-0.13707	-0.0782	-0.24926	-0.33684	-0.15479		-1.00315	-0.09256	0.100303	-0.10977	0.477306	0.412176	-0.03957	-0.35738	-0.13809	0.007908	-0.31186
-0.95191	-0.29111	0.574136	-0.16287	0.639476	0.612955	-0.22038	0.468666	-0.6465	-0.38024	-0.16663	0.070783		-0.95191	-0.24262	0.128895	0.414888	0.380563	-0.08667	0.039971	-0.15283	-0.19788	-0.24101	-0.00521	0.248609		-0.95191	-0.12079	-0.0183166	-0.12287	0.556957	0.165031	-0.13954	-0.18421	-0.10608	-0.09137	-0.27703	0.244268		-0.95191	0.015539	0.134155	-0.00907	0.450988	0.410141	0.012028	-0.32264	-0.17532	0.001857	-0.27602
-0.90067	-0.38585	1.32281	-0.17963	0.37771	0.618181	-0.17035	0.113897	-0.53497	-0.27382	-0.19614	0.285158		-0.90067	-0.2457	0.268397	0.538773	0.311638	-0.28172	0.025193	-0.40645	-0.34272	-0.33874	0.072486	0.318189		-0.90067	-0.07112	-0.079117	-0.17827	0.447386	0.002835	-0.05352	-0.1381	-0.16941	-0.17727	-0.17756	0.334121		-0.90067	0.079741	0.172488	0.039844	0.458473	0.475042	-0.03021	-0.40098	-0.01344	-0.06292	-0.34382
-0.84943	-0.51432	0.260693	-0.05277	0.33024	0.592124	-0.03236	0.439769	-0.41299	-0.31315	0.128532	0.381068		-0.84943	-0.17506	0.583217	0.455026	0.25846	-0.02948	0.037013	-0.34139	-0.27589	0.019371	0.111448	0.083435		-0.84943	-0.2054	-0.173144	-0.15321	0.373448	0.387665	0.041941	-0.24668	-0.36642	-0.24773	-0.23674	0.401141		-0.84943	0.117775	0.147555	0.230443	0.450856	0.262952	0.02357	-0.26528	-0.25709	0.111085	-0.47519
-0.79819	-0.36071	1.31777	-0.02859	0.220167	0.626189	-0.13313	0.248458	-0.35031	0.063842	-0.19974	0.006626		-0.79819	-0.262	0.180423	0.537413	0.636125	-0.03863	-0.1466	-0.15625	-0.0461	-0.69694	0.251595	0.031284		-0.79819	-0.19512	-0.119161	-0.14609	0.314616	0.124087	-0.12384	-0.18694	-0.32072	-0.19624	-0.17266	0.15151		-0.79819	0.285402	0.234906	-0.53165	0.625827	0.191682	0.01523	-0.18641	-0.23348	0.071939	-0.35778
-0.74695	-0.60834	0.400287	-0.11516	0.236033	0.31965	-0.28631	0.456073	-0.13726	-0.13768	-0.07273	0.171066		-0.74695	-0.2827	0.39753	0.331424	0.721831	-0.06121	0.054528	0.074564	-0.36915	0.242589	0.195205	0.129295		-0.74695	-0.32849	-0.12342	-0.37809	0.36371	0.141028	0.0933	-0.17433	-0.00204	0.01305	-0.16049	0.046152		-0.74695	0.280337	0.250194	-0.24726	0.403479	0.105452	-0.02193	-0.45063	-0.26938	0.143335	-0.24983
[truncated: 210 more rows]
[truncated: 13 more columns]

## Sheet: 1g
Time (s)	Reward retrieval 1												Time (s)	Reward retrieval 2												Time (s)	Reward retrieval 3,4												Time (s)	Reward retrieval 5,6
[truncated: 685 more rows]
[truncated: 13 more columns]

[truncated: 6 more sheets: 1h, 1i, 1k, 1-1, 1-3a, 1-3b]
