# Supplementary material for: A bidirectional corticoamygdala circuit for the encoding and retrieval of detailed reward memories
Source: eLife journal article supplement (doi:10.7554/elife.68617), 2021-06-17
Supplement: supp [file elife-68617-supp-v1.zip › elife_poa_e68617_Figure_2_source_data_1.xlsx]

## Sheet: 2d
	Session 1													Session 2													Session 3,4													Session 5,6
Time (s)	Noise						Tone							Noise						Tone							Noise						Tone							Noise						Tone
	2R	4L	5L	6L	7L	7L	2R	4L	5L	6L	7L	7L		2R	4L	5L	6L	7L	7L	2R	4L	5L	6L	7L	7L		2R	4L	5L	6L	7L	7L	2R	4L	5L	6L	7L	7L		2R	4L	5L	6L	7L	7L	2R	4L	5L	6L
-5	0.002635	-0.052361	0.119419	0.96536	-0.307477	0.17717	-0.248631	-0.764741	0.310333	-0.534089	0.0162177	-0.170331		-0.259495	0.324247	0.117382	0.635597	-0.288386	0.396717	-0.640922	-0.119156	-0.12206	0.178628	-0.489035	-0.030614		0.373092	-0.19282	0.34522	-0.07702	0.204208	-0.02073	0.489915	-0.37822	0.197267	-0.08452	-0.12304	-0.21962		0.934511	-0.05727	0.157119	-0.18186	0.035305	0.615565	-0.35983	0.006905	0.252417	0.155424
-4.94876	-0.057195	-0.111835	0.287737	0.967206	-0.571776	0.0704899	-0.236079	-0.628241	0.331161	-0.580354	0.0175013	0.363284		-0.124614	0.323919	0.189366	0.817424	-0.567246	0.238432	-0.70406	-0.084496	-0.321881	0.227301	-0.329676	0.198587		0.42807	-0.23961	0.480922	-0.18572	0.202858	0.039785	0.383063	-0.36111	0.325079	-0.14329	-0.18064	-0.19945		0.906021	0.144693	0.125411	-0.27135	0.179473	0.459709	-0.38485	0.094478	-0.01419	0.01725
-4.89752	-0.07909	-0.353767	0.527182	0.876729	-0.652421	0.056797	-0.381204	-0.616755	0.512728	-0.68705	-0.167857	-0.225244		-0.129479	-0.049805	0.478332	1.00293	-0.381928	0.693369	-0.606834	-0.379474	-0.352364	0.423579	-0.630265	-0.181118		0.45392	-0.11831	0.722426	-0.17741	0.089083	-0.16692	0.550035	-0.29489	0.100264	-0.31174	-0.18894	0.622013		1.19254	0.078719	0.383069	-0.16847	0.032871	0.376408	-0.23404	0.117989	0.001656	0.076171
-4.84628	-0.087435	-0.011617	0.631881	1.03403	-0.548005	0.152879	-0.420592	-1.12668	0.209724	-0.572034	-0.499927	-0.175058		-0.099346	0.122678	0.133218	0.758781	-0.925708	0.304032	-0.382983	-0.223127	-0.144003	0.288397	-0.681643	-0.163591		0.416779	-0.25056	0.610655	-0.21308	0.093335	-0.08593	0.582722	-0.03936	0.246988	-0.41948	-0.08544	-0.14582		1.32797	0.024568	0.13894	0.077693	0.039203	0.382567	-0.23914	0.113252	0.023918	0.139324
-4.79503	-0.135758	-0.099203	0.882255	0.921146	-0.798635	0.546883	-0.317193	-0.652272	0.169431	-0.666741	-0.332984	0.377439		-0.185509	0.0852848	0.132113	0.728504	-0.511203	0.0589763	-0.342613	-0.197919	-0.322137	0.213583	-0.783293	0.106622		0.317867	-0.24	0.416356	-0.05368	0.168193	0.304326	0.622522	-0.10385	0.187807	-0.34658	-0.08867	-0.10948		1.24675	-0.12708	0.172849	-0.09205	-0.02969	0.18379	-0.2487	0.183255	0.022461	0.328448
-4.74379	-0.119242	-0.047897	0.569151	1.12659	-0.548508	1.5078	-0.409138	-0.655189	-0.170077	-0.554848	-0.414648	0.246839		-0.06484	0.0279663	-0.174419	0.675162	-0.293615	0.181106	-0.413867	-0.37848	-0.366323	-0.329882	-0.6234	0.053904		0.384494	-0.41523	0.46607	-0.22314	0.060868	-0.11601	0.519534	0.018005	0.032801	-0.46511	-0.0966	-0.06226		1.30952	0.037917	0.506307	-0.16447	0.042151	0.44291	-0.24928	0.010918	-0.18911	0.200716
-4.69255	-0.070138	0.0533671	0.508934	0.964	-0.648059	0.912811	-0.484239	-0.631716	0.433371	-0.592976	-0.526045	0.168077		-0.157492	-0.075561	-0.034414	0.866472	-0.376552	0.0113925	-0.370991	-0.164473	-0.035104	0.0903629	-0.575175	0.110714		0.17074	-0.2102	0.182747	-0.31093	-0.10019	-0.11305	0.490624	0.036725	0.282274	-0.58418	-0.0032	0.031869		1.21394	-0.12455	0.554915	-0.04214	-0.05981	0.184535	-0.21962	0.08589	-0.08682	0.046212
-4.64131	-0.243533	-0.127195	0.539722	1.16277	-0.68412	0.750285	-0.329886	-0.461221	-0.273758	-0.565766	-0.577946	0.0596651		-0.06058	0.0422216	-0.15321	0.851694	-0.220269	-0.047667	-0.460044	-0.254495	-0.641844	-0.038714	-0.608608	0.0946194		0.308789	-0.27201	0.093881	-0.16322	0.016304	0.437263	0.518553	0.053798	0.251401	-0.64028	-0.21841	0.675571		1.07735	-0.05814	0.529951	0.113939	-0.07937	-0.01138	-0.31244	0.240474	-0.14564	0.084125
-4.59007	0.0173602	-0.126586	0.499825	0.890018	-0.644246	0.215389	-0.236986	-0.281146	-0.257888	-0.199006	-0.293829	-0.175757		-0.13285	-0.486813	0.0126636	0.919233	-0.629574	0.0867063	-0.442395	-0.15536	-0.360168	-0.013032	-0.119265	0.175245		0.276378	0.059862	0.492211	-0.13178	-0.15618	0.710623	0.471729	0.006899	0.13818	-0.55535	-0.30245	0.843685		0.839391	-0.07384	0.693863	-0.09652	0.043779	0.103662	-0.35592	0.429155	0.076892	0.251133
-4.53883	-0.004723	-0.217897	0.162944	1.05528	-0.755796	-0.063116	-0.2789	-0.209606	0.28953	-0.058886	-0.706433	-0.596132		-0.056794	-0.177027	-0.588313	0.915015	-0.076401	-0.285283	-0.5439	-0.331249	-0.290769	-0.095298	-0.143964	-0.026705		0.402068	0.071545	0.458374	-0.26078	0.020209	0.7569	0.329399	0.031933	0.142576	-0.41867	-0.17246	0.540935		0.902706	0.018038	0.525967	-0.087	0.000611	0.224784	-0.20751	0.40696	0.017598	-0.12137
-4.48758	-0.014924	-0.343776	0.319304	1.1321	-0.674486	-0.357909	-0.316314	-0.133506	0.148046	-0.195605	-0.488878	-0.41891		-0.198599	-0.300816	-0.331175	0.96988	-0.842016	0.0250133	-0.618468	0.0512748	-0.264943	-0.137809	-0.461871	-0.066335		0.346083	0.056749	0.113146	-0.18188	-0.03202	0.306366	0.347488	0.170486	0.129167	-0.36267	-0.19931	0.298652		0.724017	-0.02338	0.690192	0.062008	-0.21023	-0.03404	-0.24646	0.237932	-0.27063	0.088042
-4.43634	-0.215478	-0.192251	0.481528	1.51242	-0.938303	0.0605699	-0.40568	-0.169972	0.189355	-0.204759	-0.67037	0.06855		-0.082069	0.0328073	-0.268712	1.04407	-0.232504	0.189303	-0.664547	0.215517	-0.540695	0.0417536	-0.140489	0.322067		0.318404	-0.16225	0.07208	-0.09643	0.004458	0.33772	0.39835	0.066292	-0.1078	-0.54487	-0.33027	0.016269		0.711593	0.0478	0.584534	0.091137	-0.03901	0.116687	-0.04152	0.35044	0.04937	0.194697
-4.3851	-0.128811	-0.060063	0.112482	1.47908	-0.621102	-0.130895	-0.295599	-0.571695	-0.001234	-0.028964	-0.66254	-0.139968		-0.075917	-0.033408	-0.079567	1.02171	-0.252385	0.120926	-0.621753	0.457563	-0.434453	0.129203	-0.08944	0.309757		0.322858	-0.15617	0.339197	0.043122	0.011136	0.467801	0.47741	0.04699	-0.20895	-0.3298	-0.37917	0.047169		0.70835	0.292048	0.050673	0.226771	-0.03765	-0.08227	-0.22257	0.279447	-0.04303	-0.23941
-4.33386	-0.324852	0.0948456	-0.04072	1.42467	-0.937404	-0.40236	-0.333651	-0.57213	0.656192	-0.096013	-0.210758	-0.173396		-0.187123	0.0893853	-0.037413	0.73444	-0.088641	0.217824	-0.714748	-0.064441	-0.627523	-0.161373	-0.017896	0.621766		0.211316	-0.32226	0.229263	0.186311	-0.07039	0.072961	0.467648	0.01518	0.135056	-0.49787	-0.23407	-0.1884		0.752636	0.086058	0.557273	0.294943	0.171198	0.075331	-0.18307	0.328806	-0.351	-0.35337
-4.28262	-0.07955	0.0605609	0.411319	1.15825	-0.71613	0.14903	-0.353527	-0.788089	0.959407	-0.068211	-0.282175	-0.395541		-0.238773	-0.078706	-0.202952	1.08539	-0.385202	0.0881291	-0.642998	-0.228421	-0.6102	0.0725063	-0.120365	0.608793		0.351767	-0.42061	0.153893	0.029876	-0.00286	-0.00259	0.514548	-0.04987	0.288855	-0.33743	-0.02808	0.241305		0.861236	0.297314	0.381887	0.446827	0.245697	0.109913	-0.10158	0.352095	-0.13734	-0.12801
-4.23138	-0.198843	0.259879	-0.163943	1.37549	-0.797939	0.553601	-0.356781	-0.450022	0.730629	-0.14086	-0.463408	-0.267228		-0.245197	0.0080431	-0.346262	1.0579	-0.172013	0.34023	-0.750649	-0.149821	-0.531424	-0.295603	-0.334284	0.443696		0.319217	-0.5661	0.449397	0.073423	-0.02006	0.137582	0.488379	0.039062	-0.11138	-0.33196	-0.04614	0.034318		0.917061	0.23103	0.648113	0.536569	0.108618	0.08345	-0.12155	0.201025	-0.25155	-0.34559
-4.18013	-0.297345	0.0290883	-0.087144	0.973566	-0.800004	0.136754	-0.446723	-1.03664	0.933923	-0.349289	-0.432305	-0.032044		-0.392483	-0.162518	0.254765	0.814431	-0.004011	0.268062	-0.73984	-0.141705	-0.363179	0.0385732	-0.619456	0.33447		0.135585	-0.4394	0.210023	-0.02234	0.012953	0.095397	0.506458	-0.12105	0.17516	-0.3504	-0.1612	-0.15965		0.905587	0.347343	0.461897	0.719111	0.24945	0.023408	-0.26097	0.111246	-0.3776	-0.33077
-4.12889	-0.254309	0.0261856	-0.176186	1.02664	-0.620874	-0.514486	-0.428156	-0.785003	0.416662	-0.321964	-0.261344	0.0405231		-0.122524	-0.007484	0.378268	0.655171	-0.166632	-0.03364	-0.549668	-0.287275	-0.115265	-0.420961	-0.307498	0.465828		0.240602	-0.54969	0.252214	0.115246	0.142246	0.034499	0.507534	-0.15953	0.091297	-0.1961	-0.2939	-0.418		0.796076	0.379359	0.517975	0.767283	0.204895	-0.09504	-0.17706	0.255138	-0.19914	-0.14684
-4.07765	-0.416815	-0.058561	-0.185921	1.33814	-0.637249	-0.238879	-0.383083	-0.757063	0.798896	-0.256158	0.0987262	0.0737784		-0.257941	-0.442169	0.180429	0.301502	-0.406366	0.0950516	-0.471699	-0.063309	-0.196663	0.0723742	-0.070355	0.0563997		0.184947	-0.65266	0.370896	-0.1575	0.036748	-0.14703	0.509012	0.054283	0.139282	-0.13389	-0.31722	-0.03299		0.720593	0.20934	0.282212	0.711563	0.229634	-0.11482	-0.25442	0.254897	-0.42977	-0.10929
-4.02641	-0.518023	-0.026035	0.0946758	1.04649	-0.614026	-0.552319	-0.336014	-0.76373	0.92064	-0.5892	0.675732	-0.171552		-0.091124	-0.355643	0.335447	0.465771	-0.291822	-0.05675	-0.357774	-0.801719	-0.505309	0.0415553	-0.113179	-0.056674		0.219873	-0.65802	0.092061	0.06917	0.127566	-0.04541	0.516668	0.216928	0.35118	-0.19833	-0.34885	-0.43669		0.621205	0.265018	0.473845	0.43118	0.240018	-0.23061	-0.37746	0.358517	-0.592	0.002333
-3.97517	-0.508862	-0.124717	0.130339	1.21212	-0.526208	-0.73203	-0.409623	-0.6373	1.10741	-0.572155	0.687744	0.0377759		-0.04334	-0.319172	0.464667	0.265212	-0.392912	-0.071517	0.188664	-0.559789	-0.57976	0.0888417	-0.045193	0.166287		0.20721	-0.51038	0.41361	0.064237	-0.02408	0.106085	0.517946	0.202507	0.34912	-0.0295	-0.31714	-0.15687		0.595607	0.187169	0.368462	0.272898	0.374895	-0.13151	-0.35588	0.29891	-0.30264	-0.20061
-3.92393	-0.476826	-0.114213	-0.118049	1.2375	-0.408803	-0.471821	-0.254849	-0.464263	0.174626	-0.311291	0.839778	0.30028		0.159149	-0.562931	0.380817	0.242429	-0.560883	-0.161949	0.259726	-0.949374	-0.971032	0.0286246	0.496782	0.192402		0.1751	-0.51564	-0.02242	0.099669	-0.06063	0.085545	0.486179	0.07233	0.739994	0.085286	-0.32678	0.004246		0.789659	0.219945	0.489455	0.267123	0.361791	-0.03428	-0.3489	0.263054	0.043708	-0.263
-3.87268	-0.661978	0.0380059	-0.001562	0.868503	-0.544515	-0.084199	-0.348428	-0.365678	0.615286	-0.243766	0.443105	-0.364299		0.0512059	-0.546144	0.812669	-0.18912	-0.731601	-0.105359	0.284213	-0.906368	-0.519772	0.0185755	-0.049099	-0.208178		0.146511	-0.68387	0.074516	0.016917	-0.21033	0.391146	0.426227	0.234343	0.606829	0.03108	-0.09521	-0.22121		0.949455	0.078601	0.495108	0.225644	0.241637	-0.05278	-0.32086	0.216631	0.041635	-0.24727
-3.82144	-0.573867	-0.022782	-0.367917	0.847345	-0.814026	-0.539891	-0.287275	-0.833021	0.319537	-0.321358	0.391222	-0.025402		0.298243	-0.410236	0.510686	0.0777533	-0.711043	-0.066699	0.274349	-0.797215	-0.64653	0.128636	-0.363968	-0.217312		0.237777	-0.55094	-0.06165	0.230069	0.061465	0.482584	0.3464	0.367501	0.465482	0.214356	-0.1641	-0.64051		0.921674	0.101889	0.363488	0.194077	0.301291	-0.03178	-0.3365	0.201021	-0.08144	-0.23546
-3.7702	-0.662776	0.0192934	0.353795	0.61342	-0.877146	-0.676737	-0.344698	-0.760119	0.641835	-0.160273	-0.149049	0.198608		0.425509	-0.548052	0.550234	0.0245575	-0.821843	0.0032322	0.547533	-0.68823	-0.379451	-0.001716	-0.370535	-0.198083		0.404543	-0.62144	0.062559	0.255658	-0.18525	0.39985	0.47136	0.030494	0.615954	0.099291	-0.08715	-0.27087		0.953515	0.139654	0.33425	0.063035	0.10088	-0.1072	-0.30842	0.114561	-0.14728	-0.21745
-3.71896	-0.749588	0.0600087	-0.001857	0.672838	-0.833225	-0.687463	-0.336998	-0.960348	-0.031172	0.110119	-0.156255	0.315544		0.385236	-0.391171	0.342137	-0.223578	-0.576857	0.137834	0.697614	-0.175989	-0.242419	-0.02109	-0.953858	-0.000544		0.246807	-0.61731	0.105247	0.462586	-0.06678	0.495595	0.482821	0.146458	0.537049	0.228668	-0.17117	-0.31532		0.846021	0.179925	0.2614	0.283181	0.160454	-0.13348	-0.14369	0.196179	0.075128	-0.14004
-3.66772	-0.672719	-0.193674	-0.073059	0.806283	-0.687045	-0.671456	-0.199591	-0.723923	0.363824	-0.128565	-0.169805	0.151603		0.0590654	-0.755996	0.372897	-0.105676	-0.235501	0.135982	0.737443	-0.347802	-0.259968	0.274944	-0.709374	0.553783		0.250646	-0.44274	0.226526	0.30758	-0.18078	0.526326	0.5148	0.126366	0.659428	0.10096	-0.27584	-0.21634		0.64576	0.209015	0.14699	0.125351	0.217549	-0.15681	-0.17549	0.038908	-0.19742	-0.25756
-3.61648	-0.60794	-0.349798	-0.011377	0.894631	-0.314498	-0.577299	-0.240483	-0.994622	-0.222303	0.170176	-0.087196	0.269305		-0.024992	-0.559078	0.409822	-0.12898	-0.181083	-0.191003	0.735194	-0.090058	-0.709151	0.297084	-0.486936	0.389916		0.316164	-0.69555	-0.02997	0.437742	-0.30993	0.824452	0.468068	0.168657	0.636359	-0.0846	-0.082	-0.01343		0.489937	0.007384	0.265807	0.325119	0.149537	-0.04664	-0.25634	-0.08449	-0.46882	-0.12094
-3.56523	-0.467745	-0.386884	0.177484	1.06539	-0.655476	-0.584054	-0.164234	-0.945133	-0.030931	0.046563	-0.334609	0.364235		-0.27705	-0.787414	0.148706	0.0724342	-0.108216	0.0163267	0.615259	-0.475977	-0.288481	0.376022	-0.806195	0.288546		0.348374	-0.57169	0.04923	0.493728	-0.4392	0.6515	0.394374	0.044791	0.508914	0.068617	-0.23666	0.061219		0.472745	-0.08091	0.254856	0.086214	-0.0168	0.050431	-0.04614	0.050169	-0.3817	-0.07414
-3.51399	-0.581735	-0.486783	-0.170342	1.37198	-0.776483	-0.469614	-0.270328	-0.583458	0.0252991	0.132324	-0.189274	0.428335		-0.152675	-0.455551	0.421841	-0.382747	-0.41217	-0.221858	0.638899	-0.427819	-0.54057	-0.031419	-0.452485	0.456953		0.479287	-0.735	0.007322	0.342779	-0.34111	0.646363	0.283047	0.026083	0.641175	-0.22422	-0.19598	0.335651		0.35114	0.003848	0.313483	-0.01835	-0.12542	-0.17553	0.011447	-0.22724	-0.27843	-0.02382
-3.46275	-0.387249	-0.342503	0.26074	1.09898	-0.334034	-0.606721	-0.058977	-0.868729	0.0309632	-0.032774	-0.190628	0.423089		-0.26467	-0.833278	0.363221	-0.207801	-0.306619	-0.146341	0.771799	-0.373621	-0.424798	-0.118837	-0.820345	0.49956		0.495196	-0.62454	0.17882	0.202544	-0.3935	0.012701	0.375054	0.059232	0.285049	-0.13678	-0.00697	0.173263		0.359389	0.101845	0.365926	0.129324	0.046361	0.001585	-0.15227	-0.14237	-0.28855	-0.20975
-3.41151	-0.05125	-0.404383	0.686881	1.43126	-0.468281	0.215804	-0.195124	-0.670323	0.368242	0.129274	-0.212462	0.443803		-0.182623	-0.386533	0.101875	-0.126829	-0.256084	0.460531	0.825944	-0.419162	-0.185834	0.477034	-0.779053	0.222211		0.558595	-0.66501	0.02703	0.323435	-0.37695	0.266842	0.23646	0.00797	0.442089	-0.1051	-0.08715	-0.00843		0.430338	0.14834	0.222791	0.152265	-0.00425	-0.07062	-0.26473	0.041267	-0.23649	-0.16691
-3.36027	0.0250078	-0.514423	0.443071	1.57288	-0.207265	-0.493535	-0.264129	-0.382208	0.0457678	0.0959627	-0.494907	0.278986		-0.219598	-0.609167	0.158441	0.100444	-0.048014	0.256611	0.753794	-0.445319	-0.722672	0.0180886	-0.432822	0.537993		0.445129	-0.48502	0.116015	0.371282	-0.34851	0.176594	0.252932	0.18113	0.423245	-0.30412	-0.15263	0.233678		0.388201	0.156436	0.199127	0.166821	0.067189	0.024236	-0.22129	0.034072	0.114574	-0.16242
-3.30903	-0.1545	-0.783439	0.450486	1.27963	-0.408969	-0.354016	-0.276619	-0.363826	-0.65873	-0.071875	-0.362786	0.412067		-0.119013	-0.529615	0.0855874	-0.187573	-0.004425	0.224526	0.759934	-0.542759	-0.757922	0.0533546	-0.315537	0.3742		0.47112	-0.42338	0.150201	0.132052	-0.31639	0.092291	0.2031	0.276321	0.431954	-0.18521	-0.36548	0.112588		0.402797	0.046603	-0.05678	-0.09548	0.064884	-0.11594	-0.31349	0.037873	-0.64215	-0.02164
-3.25778	0.103368	-0.648011	0.537609	1.28795	-0.520755	-0.496445	-0.454601	-0.391914	-0.032808	-0.367517	-0.536386	-0.028621		-0.209245	-0.679836	-0.112656	-0.310392	-0.322017	0.337243	0.764278	-0.6093	-0.39518	0.462204	-0.07551	0.124524		0.422768	-0.58923	0.117153	0.016585	-0.15428	-0.01756	0.207161	0.217758	0.356021	-0.13536	-0.20843	0.024115		0.280674	0.247967	-0.13666	0.036529	0.011229	-0.07767	-0.39298	-0.10867	-0.44794	-0.35273
-3.20654	0.122896	-0.319252	0.152992	1.28989	-0.440992	-0.419224	-0.385223	-0.326517	-0.322451	-0.012332	-0.446409	-0.06368		-0.16019	-0.455357	0.102586	-0.239594	-0.322575	0.389261	0.87664	-0.546984	-0.542002	0.343405	0.0302606	-0.040961		0.41365	-0.68397	0.171556	-0.01112	-0.20058	0.017281	0.242658	0.246024	0.259963	-0.09407	-0.19672	-0.25909		0.241475	0.100489	-0.3757	-0.10298	0.209089	0.084491	-0.37121	0.214986	-0.3515	-0.06638
-3.1553	0.174597	-0.184711	0.421542	0.945337	-0.35205	-0.309203	-0.427017	-0.291467	-0.522692	-0.224641	-0.498259	0.144022		-0.16418	-0.353627	0.040421	0.0509989	-0.56729	0.0466218	0.894851	-0.685753	-0.399761	0.604795	-0.432379	0.277367		0.512247	-0.78395	0.086516	0.220891	-0.54301	0.087579	0.203185	0.228668	0.307472	-0.06226	-0.13938	-0.19611		0.278387	-0.01814	0.018699	-0.13663	0.034685	-0.14411	-0.32786	0.033045	-0.34611	-0.08891
-3.10406	0.0698617	-0.327393	0.376115	0.922225	-0.098114	-0.576855	-0.356682	-0.13392	-0.67947	-0.291597	-0.441344	0.152986		-0.074514	-0.486832	0.141292	-0.061089	-0.762706	9.311e-05	0.666479	-0.587643	-0.30156	0.533529	-0.452173	0.611441		0.468942	-0.71631	0.081553	0.088726	-0.43453	0.086616	0.318429	0.351066	0.164397	0.077854	0.018767	-0.06803		0.381262	0.335583	0.141402	-0.1279	0.022567	-0.26401	-0.43369	0.129639	-0.4772	-0.27495
-3.05282	-0.080102	-0.551413	0.379308	1.04122	0.216897	-0.454146	-0.402947	-0.320488	-0.227521	-0.303643	-0.491223	0.15479		0.0306803	-0.720308	-0.005788	0.291876	-0.66165	-0.032146	0.656797	-0.454005	-0.187661	0.729836	0.0583531	0.686965		0.505102	-0.6872	0.052054	-0.04311	-0.62531	0.35827	0.449636	0.258164	0.276263	0.023185	-0.12785	-0.223		0.331742	0.189768	0.192219	-0.05208	-0.14932	0.01594	-0.49592	0.220777	-0.21665	-0.36647
-3.00158	-0.115599	-0.352471	0.245789	0.929057	0.702941	-0.516513	-0.275621	-0.564415	-0.151091	-0.236772	-0.434847	-0.151959		-0.006326	-0.447293	-0.156705	-0.05751	-0.157756	0.300733	0.52019	-0.727728	-0.683908	0.32421	0.78795	0.427599		0.541193	-0.73869	0.164774	0.095611	-0.49079	0.31892	0.363435	0.403188	0.192012	-0.15311	-0.18564	0.04277		0.29975	0.279017	0.476088	0.058154	0.040761	-0.13201	-0.27896	0.224837	-0.41422	-0.13803
-2.95034	-0.076176	0.0624419	0.362688	0.771217	0.219868	-0.82982	-0.239474	-0.625054	-0.156726	-0.359187	-0.284503	-0.292033		-0.120231	-0.596574	-0.112868	-0.218838	0.0844948	0.0244042	0.4823	-0.513228	-0.375821	0.521949	0.0941033	0.202998		0.432432	-0.52717	0.251035	0.090454	-0.60103	0.172023	0.330096	0.243999	0.514185	-0.21032	-0.23466	0.133186		0.10985	0.175615	0.077654	-0.07878	0.006121	-0.07186	-0.21869	0.361495	-0.09814	-0.09982
-2.89909	-0.139073	-0.153146	0.492882	0.843464	0.196334	-0.676315	-0.144217	-0.409465	-0.306273	-0.16725	-0.29015	-0.103271		0.0388964	-0.636848	0.106194	-0.406859	-0.505869	-0.229013	0.523079	-0.274157	-0.295737	0.518642	0.512784	0.161597		0.374062	-0.55628	0.17841	-0.04766	-0.46276	0.464097	0.340355	-0.01823	0.307056	-0.22659	-0.20818	-0.12713		0.213746	0.050294	0.086916	0.049584	-0.0246	0.013516	-0.09451	0.376707	-0.28364	-0.10691
-2.84785	-0.108413	-0.149555	0.549365	0.797308	-0.05093	-0.67468	-0.022159	-0.538783	-0.501789	-0.181057	-0.232082	-0.016705		-0.108964	-0.791149	-0.044301	-0.306843	-0.852315	0.580441	0.276559	0.102835	-0.614424	0.262537	0.473704	0.349298		0.350039	-0.56855	0.379904	0.120722	-0.52124	0.320258	0.250759	-0.13181	0.316072	-0.19098	-0.06944	0.390118		0.120232	0.003177	-0.04985	0.068533	0.090802	0.070855	-0.00783	0.364356	-0.40622	-0.39506
-2.79661	-0.213279	-0.203531	0.459554	0.91013	-0.501589	-0.226397	0.0039683	-0.541112	-0.422302	-0.206482	-0.194738	-0.25727		0.0120845	-0.608353	0.156255	-0.08615	-0.711602	0.664136	0.205074	0.297119	-0.610932	0.416585	0.204562	0.239873		0.270538	-0.19767	0.452488	0.050471	-0.51052	0.037837	0.223423	0.183228	0.186137	-0.23993	0.105256	0.250683		0.18827	0.168551	-0.05935	-0.06968	0.037831	-0.14038	-0.07321	0.494154	-0.24311	-0.18603
-2.74537	-0.195501	-0.058327	0.157439	1.0708	-0.555574	-0.363924	0.0106104	-0.337589	0.0291385	-0.226522	-0.212763	0.288367		-0.118358	-0.670713	0.0322925	-0.16329	0.0456457	0.389688	0.1511	0.325239	-0.766316	0.224207	-0.023256	0.256809		0.287307	-0.39682	0.184901	0.347698	-0.54996	0.615519	0.317446	0.40358	0.035226	-0.23019	0.197906	0.506576		0.14797	0.077038	0.03823	0.123742	0.268137	-0.01641	0.066135	0.40725	-0.19136	-0.2257
-2.69413	-0.295052	0.0636744	0.737055	0.991756	-0.754146	-0.66244	-0.025096	-0.317532	0.0066752	-0.216255	-0.154977	0.0661974		0.0479263	-0.627581	0.017024	0.353395	-0.505695	0.301721	0.268116	0.569835	-0.70243	0.485467	-0.147605	0.177076		0.173406	-0.23129	0.363603	0.483029	-0.1379	1.00498	0.426418	0.481545	0.220244	-0.39933	0.269284	-0.28934		0.234043	-0.01067	0.437336	0.113409	0.378549	-0.15609	-0.02845	0.314691	-0.02267	-0.19082
-2.64289	-0.228277	-0.076081	0.547777	0.858663	-0.548141	0.404153	-0.033452	-0.34696	-0.363758	-0.117126	-0.160893	0.162768		0.0057822	-0.101436	0.0840566	0.255462	-0.092482	0.29873	0.035987	0.364963	-0.895825	0.152984	-0.428443	0.540426		0.189397	-0.16047	0.468234	0.317505	-0.14466	0.638391	0.434691	0.509111	0.340803	-0.23726	0.299139	0.056236		0.147751	-0.07493	0.474582	0.116013	0.351851	-0.20689	-0.03911	0.403849	-0.13121	-0.4096
-2.59164	-0.40575	0.205922	0.270072	0.93656	-0.397744	0.035503	-0.191797	-0.29477	-0.209473	-0.347806	-0.475344	1.05818		0.10452	-0.610735	-0.076178	0.240656	-0.032356	-0.11391	0.0104442	0.818538	-0.702934	0.202785	-0.870851	0.231772		0.103928	-0.01821	0.252182	0.444034	-0.11766	0.31803	0.492231	0.387632	0.671601	-0.38573	0.286301	0.054046		0.151373	-0.17073	0.606921	0.283781	0.385918	0.029734	-0.03172	0.362564	0.054536	-0.13711
-2.5404	-0.333632	0.408805	0.216631	0.959233	0.0173413	-0.198744	-0.144789	0.171552	-0.376492	-0.457735	-0.495216	1.23741		0.0552001	-0.347646	0.162698	0.374095	-0.167694	-0.21139	0.019925	0.519791	-0.477796	0.311338	-0.345695	0.0553391		0.039028	-0.02303	0.412621	0.423773	-0.10021	0.629123	0.395423	0.370821	0.758536	-0.47028	0.094696	0.369179		0.257476	0.048353	0.325717	0.151144	0.329132	0.179091	-0.19386	0.226449	0.164113	-0.47327
-2.48916	-0.404196	0.302299	0.344776	0.684539	-0.226918	-0.244997	-0.244616	0.0347024	-0.114374	-0.390603	-0.866275	1.3132		0.139329	-0.52805	-0.062606	0.211193	-0.542032	-0.241817	-0.010243	0.231798	-0.453268	0.496531	-0.346031	0.354149		0.008237	0.11922	0.222094	0.447116	-0.12533	0.581302	0.385884	0.281111	0.502293	-0.32171	0.204225	0.494251		0.250972	-0.08248	0.369066	0.181375	0.27427	-0.17502	-0.06219	0.250815	-0.07742	-0.3876
-2.43792	-0.538936	0.318865	0.504595	1.10647	-0.177231	-0.636905	-0.066078	-0.460159	-0.13266	-0.600042	-0.689452	0.886866		0.0380317	-0.348595	-0.354756	0.119678	-0.123972	-0.275964	0.0270132	0.1461	-0.788334	0.538372	-0.295983	0.446279		0.057662	-0.13088	0.340032	0.1999	-0.41813	0.426498	0.373774	0.312482	0.59833	-0.3157	0.213704	0.390737		0.395999	-0.22916	0.083964	0.275699	0.345554	-0.29568	-0.20177	0.165995	-0.1164	-0.3698
-2.38668	-0.399711	0.393557	0.243109	1.03452	-0.489723	0.131071	0.1109	-0.132292	-0.209871	-0.614286	-0.63382	0.600939		-0.038517	-0.452783	0.234606	0.251905	-0.231638	-0.081657	0.104273	0.572345	-0.736627	0.04792	-0.525389	-0.073173		0.096826	0.04253	0.295476	0.202629	-0.21144	0.422729	0.415277	0.369764	0.78032	-0.36117	0.17978	0.277757		0.391932	-0.10573	0.102324	0.502687	0.21894	-0.30076	-0.21787	-0.10148	0.156905	-0.38773
-2.33544	-0.394502	0.0971085	-0.07279	0.864275	-0.517082	0.0117826	-0.031213	-0.352275	-0.293261	-0.781902	-0.485197	0.763309		-0.000737	-0.503071	0.358647	0.273122	-0.080121	-0.017856	0.166522	0.297857	-0.729247	0.341133	-0.793124	0.473963		0.154103	-0.21208	0.536996	0.192133	-0.42578	0.529601	0.321161	0.350676	0.548877	-0.28862	0.203343	0.510412		0.588611	-0.10144	0.257506	0.297805	0.09724	-0.11739	-0.29084	0.045041	0.208786	-0.15635
-2.28419	-0.410706	-0.047672	0.417062	0.716896	-0.34667	-0.384244	0.0978541	-0.478001	-0.698542	-0.249288	-0.266349	0.652875		0.113076	-0.671575	-0.292604	0.479746	0.480229	-0.37856	0.0599037	0.350069	-0.629581	0.132271	-0.523128	0.126894		0.197231	-0.38451	0.186615	0.137173	-0.42296	0.512868	0.293525	0.05944	0.303825	-0.47548	0.356556	0.484669		0.494554	-0.13823	0.279493	0.25416	0.243821	0.013646	-0.32301	-0.01265	-0.10193	-0.32807
-2.23295	-0.405857	-0.142344	0.0854974	0.708291	0.0531179	-0.569998	-0.132847	-0.159308	-0.387258	-0.649454	-0.241747	0.849275		0.114334	-0.589915	-0.124347	0.461261	0.455086	-0.038633	-0.014282	0.304981	-0.618725	0.406418	-0.913192	0.31846		0.100773	-0.40572	0.169393	0.173615	-0.23904	0.193503	0.334777	0.064142	0.325279	-0.36684	0.172639	0.527682		0.418149	-0.00421	0.48008	0.148649	0.128252	-0.2524	-0.388	0.192543	-0.15683	-0.29205
-2.18171	-0.401877	0.0824115	0.321862	0.527205	-0.772697	-0.6382	-0.034914	0.0215791	-0.637902	-0.729081	-0.503057	0.396553		0.0235917	-0.31707	-0.261664	0.409264	0.307827	-0.056728	-0.111886	0.0189701	-0.677711	0.422629	-0.281992	0.577425		0.284757	-0.55925	0.114797	0.082299	-0.29366	0.37171	0.319755	-0.03715	0.359947	-0.35662	0.344186	0.612549		0.545421	-0.0476	0.289893	0.124827	0.28462	-0.36548	-0.27861	0.133882	-0.22144	-0.36878
-2.13047	-0.46165	-0.23487	0.530232	0.602718	-0.374305	-0.295562	-0.229622	-0.370982	-0.214758	-0.518845	-0.615202	0.474852		0.0750029	-0.372467	-0.10961	0.287815	0.0431257	-0.232546	0.116757	0.118444	-0.559746	0.687899	-0.364209	0.581202		0.309316	-0.56226	0.589246	0.184253	-0.22294	0.435291	0.26349	-0.05935	0.291506	-0.21707	0.524987	0.335849		0.492161	-0.1134	0.161862	0.075787	0.088182	-0.17002	-0.39391	0.125904	-0.08611	-0.31542
-2.07923	-0.246003	-0.325699	0.730507	0.624811	-0.642605	-0.571919	-0.218405	-0.206076	-0.350529	-0.675899	-0.25585	0.818037		0.139363	-0.350273	0.0049349	0.471542	-0.509141	-0.205842	0.225434	0.0022444	-0.662919	0.158352	-0.329045	0.469881		0.360625	-0.72488	0.483973	0.125782	-0.43058	0.633158	0.455387	-0.04533	0.257271	-0.29272	0.597076	0.327636		0.485324	-0.24182	0.365935	0.243581	0.16007	-0.29454	-0.30522	0.01175	0.120545	-0.16215
-2.02799	-0.046328	-0.219645	0.421476	0.248091	-0.687505	-0.034378	-0.038213	-0.272324	-0.052633	-0.519249	-0.463385	0.751744		0.172435	-0.488524	0.0463351	0.562236	-0.377417	-0.004492	0.111106	0.236403	-0.558183	0.618812	-0.29012	0.23403		0.2602	-0.73668	0.212103	0.014457	-0.29553	0.674653	0.398752	0.183907	0.172879	-0.39649	0.679275	0.49832		0.575855	-0.10989	0.328198	0.158871	0.115842	-0.32439	-0.24579	-0.06088	0.007086	-0.13644
-1.97674	-0.042682	-0.314623	0.318194	0.512597	-0.781173	-0.507068	0.045658	-0.286535	-0.317274	-0.542068	-0.595725	0.982366		-0.072782	-0.142969	0.19007	0.276769	-0.67191	-0.262921	-0.039606	-0.218315	-0.282796	0.518593	-0.682763	0.635621		0.262587	-0.69189	0.318347	0.243511	-0.39978	0.560591	0.495787	0.011412	0.30391	-0.47663	0.763296	0.520473		0.543052	-0.13147	0.252575	0.089862	0.287853	0.106503	-0.20659	0.045901	0.027233	-0.10111
-1.9255	-0.040255	-0.296158	0.566738	0.261472	-0.498121	-0.38035	-0.017567	-0.315765	-0.589658	-0.548817	-0.804875	0.611246		-0.051266	-0.581537	0.340418	0.403574	-0.564713	-0.140385	0.0500354	-0.131999	-0.248202	0.573983	-0.335858	0.0911026		0.240768	-0.69082	0.405578	-0.18615	-0.42329	0.793065	0.350269	0.0638	0.406494	-0.04824	0.575616	0.368544		0.47818	-0.36567	0.389399	0.102222	0.311802	-0.22378	-0.37302	0.434704	0.1136	-0.11298
-1.87426	-0.226303	-0.151058	0.262393	0.260557	-0.412678	-0.687257	-0.089217	-0.392361	-0.405251	-0.588297	-0.563526	0.660122		-0.078276	-0.313929	0.255519	0.230407	-0.190235	0.0214178	0.0526437	-0.537	-0.329124	0.480274	-0.327784	0.191402		0.168289	-0.45303	0.428	-0.14302	-0.33867	0.464535	0.391072	0.004532	0.043588	-0.37365	0.645092	-0.0882		0.638876	-0.18195	-0.08968	0.138444	0.058551	-0.10636	-0.35865	0.306091	-0.16238	0.033763
-1.82302	-0.345536	-0.42667	0.379242	0.0794364	-0.345402	-0.506792	-0.158572	-0.090972	0.0763961	-0.67214	-0.810277	0.0119194		-0.151378	-0.251585	0.02721	0.380633	-0.324936	0.11772	-0.070018	0.0625438	-0.545764	0.591397	-0.55879	0.292802		0.12808	-0.71197	0.369581	-0.07605	-0.4204	0.155113	0.448196	-0.048	0.096855	-0.38381	0.389597	-0.3225		0.597107	-0.17932	-0.20705	-0.00128	0.024472	-0.21455	-0.32331	0.292798	0.136695	-0.22563
-1.77178	-0.442737	-0.298305	0.34847	0.144565	-0.221333	-0.347544	-0.367898	-0.354658	-0.313355	-0.388627	-0.483097	0.296745		-0.11337	0.0329606	0.319172	0.220431	-0.492916	0.050137	-0.08308	0.189327	-0.304706	0.307614	-0.513854	0.21481		0.187692	-0.63378	0.301587	-0.26194	-0.22513	0.118546	0.434107	-0.10227	0.008659	-0.44447	0.477012	-0.59503		0.539715	-0.09009	0.239298	0.025655	-0.01846	-0.19774	-0.35889	0.43898	-0.08238	-0.17038
-1.72054	-0.524014	-0.376764	0.765343	0.103205	-0.260206	0.208709	-0.407487	0.172538	-0.373035	-0.317261	-0.609235	-0.090676		-0.104882	-0.25225	0.191723	0.353785	-0.345697	0.558956	0.0573571	0.509755	-0.585584	0.390603	-0.527995	0.144033		0.084729	-0.36815	0.589609	0.008005	-0.25963	0.096621	0.433364	-0.07542	0.134875	-0.35912	0.609144	-0.02502		0.57094	-0.11181	0.028688	0.143862	-0.14571	-0.29342	-0.28397	0.190108	-0.10192	-0.15716
-1.66929	-0.561827	-0.365754	0.48838	-0.275538	-0.287599	0.973161	-0.477158	0.518994	-0.669768	-0.23568	-0.376777	0.0615288		-0.30884	-0.036504	0.565293	0.209825	-0.362741	0.507833	-0.031086	-0.105342	-0.64154	0.668613	-0.596168	0.16674		0.020581	-0.36799	0.417243	-0.21595	-0.09191	0.267019	0.336438	-0.03956	0.133659	-0.73965	0.535312	-0.15097		0.402182	-0.30227	0.347054	0.068173	0.005558	-0.36691	-0.41935	0.2996	-0.10168	-0.34798
-1.61805	-0.696901	-0.349604	0.577033	-0.044678	-0.377742	0.709403	-0.547319	0.463958	-0.391601	-0.641434	-0.552494	0.344774		-0.130537	-0.117797	0.290121	0.226048	-0.326293	0.227094	-0.043066	0.246469	-0.90103	0.405726	-0.337978	0.290797		0.128925	-0.39937	0.525121	-0.2163	0.049556	0.477194	0.385495	-0.02363	0.074247	-0.4747	0.665996	-0.01741		0.491232	-0.18365	0.318795	0.197068	-0.10576	-0.12371	-0.44799	0.169565	-0.10821	-0.21045
-1.56681	-0.390276	-0.007243	0.454084	0.111766	-0.500016	-0.005682	-0.441347	0.349538	-0.503911	-0.531395	-0.520957	0.184009		-0.184482	-0.403593	0.225531	0.383699	-0.159076	-0.009819	-0.145982	0.236775	-0.694285	0.504261	-0.119586	0.0094568		0.030807	-0.53651	0.726894	-0.30933	0.006673	0.236092	0.36796	0.043777	0.008956	-0.65138	0.548326	-0.31864		0.513299	-0.05552	0.142792	0.134998	-0.09943	-0.22923	-0.34546	0.108157	0.070552	-0.03692
-1.51557	-0.198221	0.118684	0.774516	-0.278856	-0.241034	0.240746	-0.336927	0.342334	-0.490547	-0.44552	-0.300612	0.150085		-0.087112	-0.040719	0.187184	0.0661446	-0.403805	-0.352729	0.0865109	0.338655	-0.503473	0.802746	0.178633	0.395421		0.21011	-0.49657	0.591702	-0.21093	-0.12545	0.255495	0.253809	-0.11359	0.001259	-0.52793	0.57535	-0.25915		0.432304	0.058866	0.229946	0.142707	0.013617	-0.21702	-0.48955	0.063355	-0.28352	-0.10642
-1.46433	-0.228305	-0.231617	0.343492	-0.113827	-0.293802	0.0228664	-0.404386	0.109324	-0.618898	-0.366787	-0.211771	0.21881		-0.144125	-0.112957	-0.22308	0.38006	-0.65012	-0.13025	0.187125	-0.119799	-0.508449	0.922194	-0.368899	0.350029		0.294628	-0.5617	0.579396	-0.29358	-0.30382	0.249637	0.359164	0.03753	0.204457	-0.44218	0.647456	-0.21832		0.447226	0.064248	0.313895	0.025743	0.153585	0.014248	-0.27469	-0.01501	-0.0157	-0.00827
-1.41309	-0.13092	-0.155589	0.497599	-0.20682	-0.267995	0.230365	-0.485902	-0.272325	-0.40967	-0.522439	-0.63438	0.170671		0.066861	-0.38671	0.216842	0.2193	-1.00363	-0.162387	0.309561	0.0790121	-0.622178	1.35915	-0.45891	0.052426		0.328942	-0.48996	0.710202	-0.21165	-0.29604	0.267503	0.244306	0.001451	0.144406	-0.43977	0.713982	0.087284		0.48471	0.254879	0.532843	0.11683	0.092026	-0.15925	-0.43912	0.115157	-0.26851	-0.26614
-1.36184	-0.161765	-0.290551	-0.020172	-0.245279	-0.609907	0.0566674	-0.470583	0.0384364	-0.444028	-0.704666	-0.243394	0.472874		0.143344	-0.092939	-0.290464	-0.088318	-0.619793	-0.214488	0.167406	0.250412	-1.04853	0.870946	-0.149982	0.0760253		0.409631	-0.51097	0.545372	-0.4143	-0.20492	-0.00268	0.385092	0.21512	0.295055	-0.42607	0.650948	-0.41402		0.621417	0.268533	0.414309	-0.01709	0.134351	-0.13355	-0.38052	0.015074	-0.07573	-0.21812
-1.3106	-0.212437	-0.431236	0.0648297	0.157511	-0.343664	0.180213	-0.388208	0.155786	-0.313696	-0.289431	-0.823753	0.456616		0.236556	-0.093305	-0.180941	-0.35599	-0.602528	-0.192692	0.0321079	0.111871	-0.642063	1.0902	-0.178591	0.124704		0.312665	-0.29261	0.432689	-0.45377	-0.0294	0.295763	0.239289	0.20883	0.153218	-0.29294	0.501203	-0.17427		0.854679	0.402538	0.365666	0.028933	0.094959	-0.16091	-0.30176	0.032604	-0.23623	-0.38458
-1.25936	-0.258305	-0.163831	0.0665907	0.192157	-0.609602	-0.053616	-0.458286	0.308675	-0.430405	-0.38494	-0.618694	0.153747		0.218873	-0.045524	-0.206503	-0.311952	-0.877183	-0.136003	-0.091953	-0.450763	-0.754838	0.879401	-0.307308	-0.309158		0.250542	-0.66308	0.563587	-0.22391	-0.00126	0.402094	0.271063	0.339758	0.354915	-0.04129	0.50138	-0.27409		0.781632	0.330827	0.314683	0.016465	0.080517	-0.05557	-0.24526	0.035066	-0.071	-0.20955
-1.20812	-0.457318	-0.03972	-0.061187	0.0366766	-0.595834	-0.243131	-0.45915	0.191727	-0.420044	-0.46998	-0.277528	0.129123		0.239853	-0.287069	-0.08113	0.166854	-0.320971	-0.025397	-0.087835	-0.028593	-1.03508	0.913115	-0.663217	0.207361		0.29386	-0.485	0.736622	-0.04529	-0.11196	0.379306	0.114647	0.382419	0.392502	-0.16119	0.316384	-0.23311		0.676433	0.454353	0.228061	0.215554	0.235427	0.05698	-0.22602	0.211941	-0.15482	-0.44091
-1.15688	-0.457419	-0.412352	0.0334613	0.18768	-0.629172	-0.57457	-0.46169	0.0618409	-0.079529	-0.122647	-0.079656	0.435962		0.26977	-0.19325	-0.164478	0.0966232	-0.564771	0.643488	-0.280536	0.329451	-0.728163	0.671735	-0.85601	0.215812		0.281778	-0.50156	0.586013	-0.10436	0.151095	-0.01553	0.0862	0.317406	0.464249	-0.30844	0.401035	-0.16308		0.524204	0.385076	0.185689	0.047617	0.216222	-0.18685	-0.21589	-0.00696	-0.16572	-0.18379
-1.10564	-0.411558	0.0817458	-0.065055	0.263205	-0.607991	-0.535343	-0.601394	0.0595465	-0.176979	-0.247158	0.286036	0.583126		0.153987	-0.069032	-0.243919	0.27495	-0.446244	0.933965	-0.235973	0.547555	-0.713038	0.827516	-0.281539	0.266479		0.341244	-0.4595	0.610594	-0.11873	0.08793	0.185921	0.108338	0.163703	0.487362	-0.34656	0.160948	-0.06467		0.607076	0.379191	0.47242	-0.00969	0.122826	0.16829	-0.32523	0.009031	-0.28242	-0.22621
-1.05439	-0.530755	0.0272088	-0.15515	0.0883913	-0.322489	-0.581838	-0.515079	0.0554646	-0.399322	-0.240897	0.616017	0.575716		0.196196	-0.16799	-0.44565	0.140761	0.0075423	0.172127	-0.171499	0.910885	-0.465283	0.66116	-0.523296	0.0998856		0.314251	-0.57974	0.828406	-0.02932	-0.06084	0.299586	0.126428	0.273312	0.233017	-0.17576	0.385783	0.0525		0.466947	0.435436	0.360766	-0.11259	0.298663	0.364499	-0.37639	-0.01008	0.099494	-0.21167
-1.00315	-0.593464	0.1474	-0.290625	0.338538	-0.454258	-0.312143	-0.588657	-0.193946	-0.448887	0.0638218	0.621846	0.617956		0.0486073	0.0472687	0.077348	0.0516079	-0.726402	0.168532	-0.336747	-0.065385	-0.782061	0.486353	-0.328804	0.32035		0.224586	-0.31312	0.941449	-0.06913	-0.0423	0.029826	0.112291	0.116205	0.512125	-0.15765	0.184985	-0.12211		0.411518	0.170547	0.241741	-0.12968	0.216461	0.12288	-0.35678	-0.01901	-0.08361	-0.34106
-0.95191	-0.554544	0.264716	-0.19686	0.172808	-0.450513	-0.477092	-0.507151	-0.265205	-0.501363	0.162646	0.0482072	0.372426		0.305442	0.113676	-0.070656	-0.028857	-0.574832	0.200275	-0.311023	-0.072397	-0.427081	0.653946	-0.377358	0.125874		0.104357	-0.33193	0.752371	-0.16476	-0.00247	0.131121	0.046651	0.207311	0.513938	-0.24666	0.060988	-0.06387		0.3191	0.094099	0.691357	-0.13346	0.185722	-0.0032	-0.36735	-0.29287	0.253707	0.00963
-0.90067	-0.475469	0.293357	-0.139615	0.307938	-0.587953	-0.589679	-0.465372	-0.074159	-0.815983	0.343747	0.0012682	1.0825		0.283452	0.0626149	-0.167816	0.0239192	-0.622969	-0.390716	-0.473275	0.367245	-0.252899	0.696413	-0.807658	1.00302		0.148421	-0.68746	0.931279	0.005306	0.183277	0.376808	0.194176	0.144022	0.744476	-0.18639	0.138899	-0.01227		0.354427	0.110662	0.380656	0.105798	0.16267	-0.20323	-0.37985	-0.21514	-0.12425	-0.00126
-0.84943	-0.380236	0.55136	-0.27088	0.217829	-0.535486	-0.695341	-0.674732	-0.312637	-0.616223	0.834996	-0.243023	1.05354		0.180509	-0.027964	0.0705617	-0.008802	-0.656417	-0.072925	-0.442316	0.0488731	-0.419572	0.685826	-0.52433	0.369451		0.162041	-0.372	0.808794	-0.09081	0.553099	0.309231	0.15762	0.126457	0.395731	-0.12494	0.232556	-0.26384		0.259787	0.190732	-0.08759	0.023225	0.175999	-0.17508	-0.49006	-0.15698	0.059512	-0.00216
-0.79819	-0.166323	0.744157	0.0327671	0.0197422	-0.496831	-0.278378	-0.600166	-0.092881	-0.640746	0.741924	-0.444754	0.702872		0.0558213	-0.078683	-0.105846	0.1544	-0.54262	0.0851508	-0.478901	0.31667	-0.460404	0.623821	-0.655477	0.705601		0.236217	-0.45942	0.838105	-0.17302	0.2153	0.009314	0.217788	0.019486	0.504773	-0.29375	0.167431	-0.21619		0.191216	0.171179	0.124082	0.132027	0.234449	-0.11119	-0.44524	-0.169	-0.20791	0.200178
-0.74695	-0.23607	0.800845	-0.046662	-0.027241	-0.348123	-0.730034	-0.496186	-0.086284	-0.313785	0.668697	-0.751272	0.440714		0.155621	0.159593	-0.065671	-0.071404	-0.787174	-0.16131	-0.617747	0.0604129	-0.291981	0.448786	-0.890094	-0.032421		0.217411	-0.3744	0.698139	-0.04567	0.262957	0.357439	0.273124	0.046193	0.536766	-0.21619	0.239571	-0.26749		0.290966	0.136394	0.060572	0.167748	0.295637	0.073133	-0.43514	-0.29299	-0.10243	0.409546
-0.6957	-0.036228	0.780522	0.125009	0.21144	-0.437677	-0.475528	-0.59786	0.0109284	-0.384806	0.663148	-0.551745	0.310243		0.0515614	-0.271264	0.295218	-0.247846	-0.785692	0.174886	-0.643368	0.327853	-0.300678	0.825578	-0.756247	0.387885		0.315258	-0.19948	0.625265	-0.10959	0.081235	0.369754	0.342287	0.016904	0.76329	-0.28579	0.219978	-0.01101		0.264299	0.047234	0.012911	0.100459	0.379642	0.032215	-0.31977	-0.26235	-0.03564	0.467203
-0.64446	-0.065761	0.753998	0.243224	0.407286	-0.579508	-0.505627	-0.492351	0.0155051	-0.411028	0.739525	-0.377377	0.300713		-0.009721	-0.129102	0.229705	-0.481361	-0.392176	0.0545769	-0.534009	0.0530466	-0.172577	0.65346	-0.530908	0.385516		0.231879	-0.29366	0.438461	0.060285	0.148992	0.500226	0.356697	-0.03215	0.631752	-0.36335	0.223106	-0.18904		0.142597	0.128453	-0.01661	0.289219	0.09302	0.077719	-0.4039	-0.23858	-0.02842	0.272651
-0.59322	0.0923938	0.449484	0.428232	0.457164	-0.272026	-0.426148	-0.356677	-0.010878	0.0890345	0.214849	-0.589947	0.433037		-0.013311	-0.183969	0.322488	-0.313525	-0.828592	0.510711	-0.611267	0.0228164	-0.615498	0.844247	-0.936635	0.73153		0.231203	-0.33533	0.659498	0.061152	0.126907	0.464093	0.414537	-0.16262	0.480637	-0.37261	0.283124	0.409611		0.141937	-0.01543	-0.17676	0.097995	0.024721	0.061791	-0.24948	-0.36432	-0.32787	0.111536
-0.54198	0.0683452	0.358131	0.0043342	0.835917	-0.113425	-0.005136	-0.500305	-0.416308	-0.363419	0.274311	-0.276589	0.512597		-0.052393	-0.100254	0.165391	-0.309732	-0.563015	0.109001	-0.524177	-0.265939	-0.826493	0.365117	-0.511085	0.424886		0.273388	-0.31164	0.647892	0.007582	0.138251	0.067085	0.243086	-0.15335	0.347597	-0.17873	0.369932	0.19312		0.121589	0.194895	-0.08452	0.240344	-0.10671	-0.03595	-0.40264	-0.17263	-0.10161	0.318885
-0.49074	0.0523889	0.354305	0.251345	0.929778	-0.249907	-0.340208	-0.520889	-0.194671	-0.345854	0.549701	-0.457684	0.761805		0.079355	0.122621	0.128919	0.184664	-0.437675	0.54584	-0.615276	-0.056661	-0.766559	0.747999	-0.628439	0.0640203		0.395226	-0.38231	0.618796	0.019517	0.297687	0.383526	0.396144	0.04071	0.24768	-0.3273	0.506038	0.126206		0.003288	0.260112	0.021034	0.167402	0.301	-0.01998	-0.13108	-0.10123	-0.23766	0.177309
-0.4395	-0.217349	0.310184	0.196326	0.773362	0.0829905	-0.149305	-0.265271	-0.032111	-0.161426	0.441614	-0.447364	0.111428		0.10173	-0.04307	0.0784022	0.0225714	-0.68177	0.477251	-0.529178	-0.168886	-0.608121	0.436528	-1.00597	0.344134		0.321935	-0.41568	0.540776	0.040006	0.341066	0.5016	0.487558	0.097903	0.034188	-0.29372	0.431325	0.086262		0.099252	0.095741	0.053188	0.110979	0.312487	-0.18112	0.003776	-0.09711	-0.19095	0.215836
-0.38825	-0.445294	0.0088922	0.397218	0.776765	-0.411762	-0.284964	-0.479838	0.0715831	-0.392258	0.263395	-0.604659	0.0808214		0.0679979	0.0600706	0.623469	0.0067193	-0.170323	0.221144	-0.548264	-0.320328	-0.8706	0.221574	-0.827929	-0.032209		0.435675	-0.42277	0.696576	-0.08069	0.482527	0.409352	0.389537	0.153651	0.435151	-0.32141	0.505645	-0.14176		0.139075	0.178613	-0.05314	0.215873	0.299588	0.014016	-0.05871	0.025418	-0.00435	0.074166
-0.33701	-0.367504	-0.01567	0.250352	0.596679	-0.427895	0.0563193	-0.580809	0.0437233	-0.427688	0.448704	-0.294653	0.148889		0.0401667	0.128522	0.782014	-0.408852	-0.43687	0.31798	-0.694229	-0.330297	-0.557584	0.334738	-1.16577	0.193216		0.29249	-0.63309	0.626253	0.122667	0.461604	0.143972	0.214197	0.016045	0.035437	-0.31243	0.64014	-0.05616		0.161765	0.100457	0.088181	0.03246	0.234175	0.124555	-0.08311	-0.07728	-0.18798	0.05078
-0.28577	-0.443464	-0.030382	0.358002	0.458813	-0.258533	1.05827	-0.448107	0.137713	-0.16944	0.567136	-0.460109	0.490311		0.0208097	0.623423	0.598663	-0.322365	-0.158771	0.338757	-0.670057	-0.207597	-0.53796	0.315016	-0.972439	0.008573		0.358409	-0.36788	0.875521	0.170106	0.445101	0.257293	0.261173	-0.05603	0.163944	-0.3908	0.559908	-0.02724		0.048619	0.073333	0.103252	0.073513	0.10097	0.032503	-0.01629	-0.21531	0.090519	0.076302
-0.23453	-0.537445	0.315199	0.342024	0.327816	-0.290931	0.0652899	-0.476131	0.293634	-0.204511	0.641619	-0.536812	0.352393		0.158315	0.14356	0.324249	-0.145709	-0.196236	0.538661	-0.656089	-0.394148	-0.725325	0.320861	-0.772575	-0.174787		0.152577	-0.25462	0.755583	-0.01274	0.573763	0.46009	0.203759	-0.01584	0.172285	-0.12022	0.730624	-0.08286		0.060404	0.031493	0.00457	0.213384	0.074525	-0.21234	-0.13579	-0.05636	0.166293	-0.04575
-0.18329	-0.506184	0.265331	0.354159	0.191896	-0.329125	-0.163175	-0.410665	0.346813	-0.130573	0.220054	-0.264462	0.958605		0.252458	0.070967	0.566812	-0.410559	-0.330003	0.200188	-0.688539	-0.422231	-1.09564	0.345417	-0.809462	0.17121		0.149768	-0.15027	0.707161	0.149267	0.488747	0.525482	0.220998	0.029296	0.085471	-0.2692	0.870064	-0.07736		0.028376	0.016062	0.352926	-0.06708	0.074204	-0.22001	-0.12058	-0.01106	0.051437	-0.05339
-0.13205	-0.594635	0.552338	0.153579	0.298907	-0.697464	-0.35931	-0.462931	0.134771	-0.317395	-0.062764	-0.194146	0.78777		0.388211	0.433473	0.318188	-0.248381	-0.423776	-0.215835	-0.773173	-0.506707	-1.06569	-0.236704	-1.15019	0.370212		0.149282	-0.149	0.714113	0.163478	0.333401	0.822554	0.187056	-0.03738	0.131345	-0.19758	0.78137	-0.0793		0.089216	0.026656	0.092933	-0.06131	0.049527	-0.07685	-0.11967	0.028195	0.055395	-0.04796
-0.0808	-0.49512	0.574857	-0.089768	-0.01987	-0.732354	-0.587036	-0.459969	0.399142	-0.257475	0.1179	-0.386185	0.607478		0.337382	-0.232377	0.837945	-0.075072	-0.251762	-0.101694	-0.712493	-0.505155	-0.705017	-0.131767	-1.09648	0.154147		0.124173	-0.2414	0.65573	0.094153	0.253932	0.359154	0.223141	0.145002	0.286902	-0.28791	0.659838	0.200162		0.121221	0.016394	-0.09692	0.00596	0.032421	0.141598	-0.12689	-0.01782	-0.04857	-0.15672
-0.02956	-0.552988	0.585394	0.214306	0.177113	-0.754019	-0.248125	-0.48357	0.0127134	0.141652	-0.100901	-0.415852	1.00944		0.237696	-0.154154	0.355126	0.271017	-0.461039	-0.198445	-0.731704	-0.479572	-1.09161	-0.169059	-0.779653	0.123268		0.154343	-0.29617	0.52656	-0.09671	0.435793	0.905453	0.317502	0.014856	0.202325	0.040772	0.632276	0.388535		0.044745	-0.06332	-0.10969	0.015676	-0.06353	-0.06555	-0.09163	-0.18451	-0.33214	-0.02374
0.021679	-0.541216	0.533385	-0.096624	0.136906	-0.598079	0.319497	-0.607119	0.290009	-0.294673	-0.130463	-0.188468	0.344752		0.354073	-0.140281	0.44541	0.426322	-0.369505	0.176926	-0.616809	-0.753456	-0.812612	0.207808	-0.929367	-0.135869		0.169276	-0.26614	0.705516	0.111526	0.899872	1.00991	0.323945	0.006181	0.215269	0.103148	0.816104	0.368928		0.107562	0.018146	-0.03009	-0.01224	0.103215	-0.24197	-0.00662	-0.40352	-0.39724	-0.11665
0.072921	-0.601778	0.54198	-0.162182	0.35198	0.589191	-0.089933	-0.503815	0.474004	-0.249408	-0.147519	0.579584	0.596572		0.599739	-0.146434	0.416109	1.23282	0.967179	0.0177243	-0.608244	-0.140907	-0.661666	0.0082067	0.330088	0.0633624		0.277008	-0.35416	0.943932	0.758846	1.74238	1.28235	0.575422	0.003624	0.668183	0.799789	1.31871	0.201568		0.161305	-0.05148	0.159465	0.544979	0.750155	0.015096	-0.10104	-0.22429	-0.02734	0.153699
0.124162	-0.294845	0.185283	0.0041916	1.15237	2.06098	0.338678	-0.265431	0.44525	-0.169747	0.587011	2.37075	0.685716		0.836909	0.0015497	1.03022	1.99762	2.98024	0.270082	-0.582148	-0.585746	-0.514469	1.07441	1.87709	0.0021156		0.270678	-0.36148	1.06129	1.28914	2.16241	1.30173	0.549307	0.139738	0.807154	1.624	1.8868	0.338151		0.349787	0.16285	0.561759	1.11971	1.32576	0.279452	0.060347	-0.12637	0.16997	0.831684
0.175404	-0.038148	0.198468	0.308228	2.32655	3.64379	1.00052	0.138477	0.378213	0.116971	2.13577	3.93006	0.958311		0.807277	0.0762542	1.01658	2.81972	3.61594	0.582237	-0.557138	-0.004298	0.173797	1.91587	2.86149	0.432652		0.336254	-0.24371	1.17415	1.67415	3.00152	1.15433	0.837026	-0.0797	1.40862	1.74247	2.30205	0.637299		0.345661	0.122713	0.497921	1.46077	1.87382	0.299568	0.155835	-0.15277	0.317431	1.32624
0.226646	0.0680924	0.534723	1.07573	3.46418	4.7308	2.28704	0.0429509	0.556457	0.909882	2.75907	4.76397	1.3725		0.789982	0.0625385	1.36402	3.11452	4.59529	0.860902	-0.463807	0.0111611	0.321111	2.45429	3.07938	0.523018		0.222788	-0.24077	1.51481	1.54873	3.2797	1.33837	0.883744	0.21343	1.34755	1.79769	2.47048	0.570429		0.390366	0.100071	0.456926	1.61486	2.41012	0.312103	0.233094	-0.04442	0.457874	1.36566
0.277887	0.63307	0.202045	1.67214	4.37341	5.5401	2.43641	0.101826	0.530061	1.45544	3.06469	4.9709	1.50612		1.03114	-0.045383	1.16323	3.2051	4.41348	1.06161	-0.593468	-0.327574	-0.205492	2.75664	3.53869	0.883296		0.151115	-0.21527	1.53536	1.45344	3.28418	1.09182	0.725004	0.299205	1.34227	1.62983	2.12157	0.32424		0.328127	0.058662	0.935715	1.75416	2.45856	0.336476	0.123279	0.01188	0.421822	1.37678
0.329129	0.95967	0.111368	1.55855	4.36317	6.48438	2.28154	-0.037066	0.673214	1.30517	3.07861	5.25066	1.89996		0.978417	0.0303562	1.30969	2.86696	4.44022	1.15187	-0.482429	-0.404162	-0.145256	2.67475	3.34793	0.718499		0.180753	-0.34241	1.90617	1.35665	3.16425	1.47094	0.675714	0.057142	1.14702	1.41305	1.85206	0.334856		0.350716	0.141465	0.648068	1.73302	2.49872	0.308518	0.038782	0.01921	0.280752	1.20338
0.380371	0.607566	0.279804	1.24467	4.19528	6.10218	2.15644	-0.05601	0.508329	0.893383	2.82298	4.77283	1.66317		0.831485	0.336066	0.930555	2.97084	4.35688	0.690474	-0.543486	-0.525505	-0.098984	2.29804	2.85718	0.753392		0.178584	-0.43556	1.35634	1.35044	2.75872	1.44208	0.73621	0.136657	0.838981	1.41955	1.69273	0.041289		0.368659	0.156255	0.608858	1.57746	2.57419	0.349732	0.074383	-0.09395	0.036192	0.959674
0.431612	0.608192	0.477667	1.3738	3.79025	6.0215	2.12569	-0.119114	0.486432	0.487547	2.4309	4.40853	1.45657		0.55844	0.0870983	0.791978	2.67018	4.38055	1.06141	-0.5482	-0.364593	-0.613399	2.14699	2.67434	0.56955		0.258733	-0.25045	1.58784	1.19694	2.70176	0.880811	0.647786	0.081491	0.545458	1.19	1.46892	0.016059		0.460417	0.214126	0.567648	1.35519	2.39214	0.228379	0.086267	-0.20867	0.071243	0.988366
0.482854	0.205334	0.364172	1.02772	3.49867	5.38163	2.08774	-0.279591	0.486905	0.412104	2.57322	3.77738	1.18315		0.656901	0.0572537	0.576264	2.46525	4.52313	1.09246	-0.482182	-0.537214	-0.733122	1.67762	2.76156	0.245323		0.005673	-0.21952	1.39578	1.12564	2.49332	1.19247	0.574409	0.154053	0.323964	1.05971	1.39114	0.136143		0.379886	0.096256	0.595659	1.41097	2.14029	0.381339	-0.07546	-0.1219	-0.05839	0.948185
0.534095	0.146189	0.243252	1.12474	3.16982	5.03808	2.01118	-0.244024	0.3391	0.365215	2.00275	3.79578	1.35628		0.623286	-0.232023	1.16171	2.61501	4.22713	0.992483	-0.650046	-0.55521	-0.576009	1.66942	2.09716	-0.016466		-0.03806	-0.29767	1.47153	0.959164	2.49471	1.07414	0.532715	0.209228	0.573106	0.911483	1.48508	0.386612		0.357779	0.199794	0.599201	1.15409	2.07848	0.282395	-0.01424	-0.15471	0.106454	0.659798
0.585337	0.178308	0.496922	0.650216	2.83998	4.65517	1.55184	-0.253414	0.697828	-0.167757	1.91343	3.56633	0.995746		0.560523	-0.193323	0.789375	2.3288	4.45907	1.13069	-0.653768	-1.00376	-0.953241	1.87255	2.29365	0.352467		-0.06992	-0.31836	1.62515	0.700949	2.40838	1.24478	0.506982	0.092487	0.347462	0.86098	1.30691	0.236537		0.284213	0.047446	0.809777	1.13914	1.9433	0.362978	0.025675	-0.22128	-0.18776	0.627593
0.636579	0.216433	0.0783071	0.921428	2.3203	4.54071	1.55616	-0.218586	0.436931	0.692664	1.74099	3.85439	0.36177		0.434351	-0.203567	0.96535	2.04945	4.1195	0.631038	-0.625732	-0.421587	-0.442116	1.4682	1.83948	0.181723		-0.09937	-0.36841	1.70568	0.716143	2.1484	1.31373	0.516223	-0.00845	0.358437	0.718707	1.45742	-0.08865		0.202585	0.052426	0.734808	1.104	1.82234	0.09271	0.005178	-0.12551	-0.26506	0.654561
0.68782	0.414967	0.172991	0.890946	2.26631	4.23332	0.856967	-0.276994	0.255156	0.0818646	1.68072	3.9947	1.11646		0.496502	-0.227374	1.13645	1.83264	3.91029	0.747436	-0.582038	-0.73638	-0.19928	1.07986	1.93462	0.131175		-0.05385	-0.31117	1.62088	0.776784	2.18417	1.39047	0.525686	-0.17117	0.302087	0.548822	1.52688	-0.05813		0.223058	-0.08117	0.783599	0.955341	1.68277	0.209623	-0.06092	-0.31937	-0.31622	0.723625
0.739062	0.336	0.210911	0.272737	2.01498	3.90695	0.927755	-0.207688	0.0355887	0.294845	1.50169	3.94659	0.884471		0.415667	0.188035	0.874817	1.87501	3.39626	0.585193	-0.568892	-0.418857	-0.230199	0.986824	2.38167	0.49346		0.014216	-0.38995	1.64712	0.765225	1.94427	0.626887	0.609629	-0.08949	0.250047	0.369902	1.77967	0.410473		0.098094	0.012683	0.739955	0.857749	1.61618	0.057481	-0.02431	-0.31413	-0.05002	0.656748
0.790304	0.235961	0.0850168	0.329901	1.86293	3.83073	0.782899	-0.263863	0.228172	-0.163225	1.52411	3.91389	0.824114		0.400881	-0.141375	1.08351	1.83268	3.95323	0.726636	-0.502547	-0.534539	-0.462887	1.12176	2.07681	0.290806		0.086214	-0.40973	1.47967	0.629432	1.81558	1.17333	0.492444	-0.29486	0.128043	0.362504	1.79019	0.399311		0.218663	0.186843	0.70337	0.746067	1.60722	0.138106	0.012512	-0.35621	-0.11066	0.652741
0.841545	0.211671	0.190572	0.777447	1.93091	3.75943	0.849872	-0.302208	0.0454309	0.0281008	1.44844	4.17142	0.607265		0.357388	-0.044341	0.957697	1.81657	3.43558	1.01839	-0.611255	-0.473615	-0.579986	0.689222	1.97415	0.536561		0.185671	-0.35804	1.58778	0.526464	1.82635	0.982206	0.519483	-0.25278	0.272341	0.105201	1.64257	0.496839		0.107525	0.104855	0.539768	0.730934	1.39694	-0.10314	-0.00731	-0.2227	-0.10585	0.426107
0.892787	0.0332555	0.15558	0.189575	1.79929	3.73319	0.594403	-0.357149	0.0773758	-0.05031	1.29282	3.98925	0.550003		0.512325	0.171202	1.25905	1.69388	3.63495	0.760206	-0.653632	-0.244785	-0.230342	1.12979	1.56046	0.405735		0.066434	-0.38364	1.23622	0.257256	1.66928	1.00698	0.507721	-0.30354	0.245263	0.228731	1.67934	0.188606		0.075614	0.030542	0.982327	0.855162	1.32923	0.444375	0.090644	-0.37596	-0.1835	0.46552
0.944028	0.0068583	0.430194	0.333794	1.787	3.77951	0.999397	-0.294908	-0.015194	0.147231	1.70275	3.81143	0.192871		0.488567	0.180147	0.752846	1.31749	3.58806	0.773757	-0.68508	-0.555341	-0.692338	0.954072	1.88449	0.816489		-0.01288	-0.18836	1.23767	0.419086	1.49742	0.813159	0.321483	-0.28587	0.237238	0.306052	1.4763	-0.27485		0.085567	0.145357	0.779238	0.815999	1.29217	0.221289	0.09116	-0.07985	-0.02065	0.408887
0.99527	0.0055142	0.534396	0.637774	1.92072	3.55611	1.06248	-0.46659	0.0445105	0.21643	1.23401	3.53534	0.811317		0.468998	0.518193	0.953912	1.11583	3.3077	0.738139	-0.612754	-0.181687	-0.753676	0.868282	1.4041	0.51276		0.039141	-0.10982	0.810613	0.430158	1.38154	1.25673	0.33336	-0.45521	0.218055	0.20394	1.28565	0.340424		0.100229	-0.04461	1.19489	0.608203	0.979755	0.312428	-0.09583	-0.09389	-0.27081	0.419316
1.04651	-0.010553	0.512539	0.61021	2.03054	3.65442	0.300757	-0.413442	0.101731	-0.205053	1.31648	3.11002	0.187123		0.235088	-0.325693	1.28305	1.46118	3.26488	0.261659	-0.548757	-0.291029	-0.64178	0.277908	1.05488	0.381162		-0.15786	0.005516	0.857205	0.345022	1.26765	1.42773	0.291737	-0.50415	0.091504	0.518869	1.0504	-0.17811		0.253459	-0.02687	0.865196	0.624407	1.16299	0.294731	-0.10424	-0.2203	-0.30723	0.293354
1.09775	0.0039671	0.541319	0.518916	2.1098	3.41124	0.723304	-0.402166	0.041623	-0.011104	1.58714	3.31861	0.037794		0.446971	0.119429	0.897393	0.732051	2.70809	0.620576	-0.735076	0.138418	-0.54393	0.0117613	0.843286	0.204961		-0.1772	0.048312	0.666542	0.244041	1.45023	1.39707	0.245316	-0.27851	0.098096	0.557881	0.922612	0.188463		0.203272	-0.02075	0.958678	0.633333	1.0596	0.413477	-0.17978	-0.13763	-0.13216	0.209738
1.14899	-0.044912	0.448506	0.227137	2.19084	3.13527	0.890621	-0.366853	-0.207321	-0.008897	1.48751	3.32545	0.065982		0.523485	-0.158849	0.888249	0.947007	3.29063	0.642693	-0.380799	0.500474	-0.731574	0.0761838	0.577609	0.244647		-0.1594	-0.27702	0.78712	0.206702	1.36184	1.40426	0.204867	-0.39016	-0.0713	0.484536	0.803457	0.372933		0.134281	0.002453	0.922656	0.610472	0.874288	0.245998	-0.22976	-0.18314	-0.21764	-0.00801
1.20024	0.188289	0.0418451	0.273141	2.31528	3.04262	0.690597	-0.32535	0.189816	0.0549474	1.67121	3.01591	0.0074361		0.471066	-0.388599	1.34928	0.717485	3.03335	0.847191	-0.315222	0.309696	-0.707196	0.10762	0.752999	0.130573		-0.12212	-0.15098	0.837667	0.290444	1.2844	1.19167	0.11926	-0.4213	0.182712	0.621278	0.710546	0.266601		0.158815	0.09403	0.579423	0.575151	0.76015	0.275648	-0.34888	-0.02299	-0.01247	0.264848
1.25148	0.0406395	0.0760329	0.47278	2.32536	2.59092	0.566721	-0.209102	0.139255	-0.338878	1.82713	2.65104	0.046709		0.510475	-0.119617	1.44367	0.787692	2.9512	1.13673	-0.337953	-0.159863	-0.699627	0.274265	0.560296	0.168034		-0.16676	-0.21063	0.85376	0.095586	1.21368	1.46304	0.153428	-0.27003	-0.00677	0.645693	0.53987	0.307291		0.383074	0.030065	0.675818	0.451689	0.681066	0.197415	-0.30279	-0.01399	-0.10604	0.117795
1.30272	0.363364	0.112219	1.41432	1.91759	2.71654	0.548746	0.043418	0.221957	-0.098163	1.62889	2.37694	0.474617		0.466924	-0.253614	1.39982	0.792044	2.63675	0.743405	-0.362046	-0.004705	-0.765746	0.559252	0.660365	-0.108677		-0.08229	-0.09008	0.549075	0.051954	1.10694	1.40866	0.163017	-0.4849	0.173984	0.455817	0.63812	0.290787		0.471573	0.077578	0.766853	0.595332	0.820212	0.172766	-0.25489	0.009864	-0.18063	0.187161
1.35396	0.264143	0.0050715	1.68678	1.73262	2.75813	0.831298	0.176941	0.129902	-0.332415	1.35618	1.89908	0.142724		0.405592	-0.018464	0.953491	1.02232	2.23316	0.605792	-0.243245	-0.232368	-0.303591	0.644905	0.273718	-0.068647		-0.01348	0.054475	0.745467	-0.09454	1.06544	0.984598	0.184053	-0.3819	0.344997	0.405297	0.736201	0.131308		0.429499	0.066091	0.741998	0.470529	0.474455	0.257522	-0.41245	0.159036	-0.2074	0.112254
1.4052	0.239336	0.352896	1.84047	1.83875	2.81827	0.754622	0.0820288	-0.246584	-0.608697	1.17354	1.75076	0.71636		0.55551	-0.252995	0.966783	0.743365	2.1162	0.612356	-0.241896	-0.083946	-0.662425	0.692874	0.456318	-0.115064		-0.03599	0.178449	0.842072	0.147158	1.05238	1.21341	0.118176	-0.40393	0.262804	0.514226	0.731898	-0.05703		0.445225	0.030134	0.719654	0.521441	0.410765	0.364404	-0.22063	0.070208	-0.17535	0.117999
1.45644	0.185979	0.205463	1.33409	1.80212	3.10212	1.20715	0.0651777	-0.229325	-0.235689	0.785823	1.8436	0.0228356		0.481958	-0.272257	0.508031	0.215366	2.22819	0.875661	-0.254465	0.0330028	-0.249018	0.948661	0.382969	0.0544802		0.063677	0.512379	0.837661	0.146639	0.973133	1.22232	0.170003	-0.36434	0.179209	0.470825	0.640645	0.351519		0.354569	-0.05467	0.63148	0.372503	0.521221	0.221145	-0.15925	0.144792	-0.465	-0.1295
1.50769	0.203777	0.0249077	0.99172	1.70033	2.63336	1.18415	-0.063897	0.0590312	0.503916	0.541325	1.40787	0.714801		0.464694	-0.202157	0.783667	0.658219	1.87766	0.586361	-0.461767	0.341874	-0.43179	0.497035	0.203485	-0.011592		-0.01473	0.533195	0.826968	0.071512	0.859808	0.96352	0.126185	-0.23264	0.159432	0.3602	0.522985	0.067798		0.337944	0.106196	0.766113	0.473178	0.555732	0.28749	-0.2904	-0.06968	-0.03634	-0.01961
1.55893	-0.026403	-0.017437	0.953268	1.53114	2.66812	0.385086	-0.007235	0.341762	0.428465	0.445222	1.62671	0.76039		0.361486	-0.24062	1.04336	0.690313	2.06873	0.614256	-0.405661	-0.254347	-0.782927	0.748918	0.329634	0.024165		0.084178	0.481522	1.00914	0.01618	0.800259	1.46837	0.09288	-0.3272	0.174002	0.165873	0.307977	0.010941		0.463369	0.12661	0.606588	0.284429	0.377681	0.354049	-0.30171	-0.07821	-0.34658	-0.00477
1.61017	-0.140891	-0.046573	0.883521	1.42041	2.54622	0.57849	0.0247374	0.363469	0.47234	0.498641	1.55919	0.558006		0.370508	-0.197998	1.20189	0.508515	1.5089	0.707255	-0.021568	0.0955173	-0.546512	0.926327	0.403867	-0.134629		0.018167	0.510992	0.995496	0.026379	0.727709	1.46519	0.099718	-0.14853	0.080982	-0.01918	0.338472	0.058839		0.457686	0.216416	0.593487	0.606108	0.451406	0.405439	-0.11755	0.030414	-0.30558	0.06658
1.66141	-0.272082	0.159221	1.08396	1.21636	2.53567	1.24359	-0.042211	0.329815	0.121883	0.659396	1.37859	0.414347		0.389848	-0.110982	1.30323	0.337166	1.93629	1.19817	-0.150319	0.118488	-0.514746	0.655791	0.286306	0.100059		0.191925	0.241262	0.918653	0.099057	0.502553	1.6465	0.015314	0.107189	-0.0825	0.113342	0.410914	-0.01126		0.564715	0.293585	0.630391	0.390244	0.249893	0.327586	-0.09381	0.031251	-0.35014	0.070218
1.71265	-0.378386	0.514597	0.380851	1.26851	2.58144	0.99894	-0.207291	0.191478	0.0687218	0.644556	1.44492	0.791029		0.486459	0.135367	0.990041	0.162474	1.50566	1.0249	-0.237851	0.544223	-0.796974	0.997971	0.0732242	-0.0889		0.122546	0.254327	0.737239	-0.18209	0.288688	1.35898	0.118073	0.167345	0.12291	0.131604	0.591889	0.019871		0.871325	0.421963	0.332059	0.453361	0.366259	0.430434	-0.13969	0.066447	-0.40338	0.209371
1.76389	-0.44713	0.475486	0.436187	0.992938	2.79635	0.921815	-0.239644	-0.237461	-0.427473	0.721908	1.72666	0.348092		0.349373	0.278032	0.651404	-0.020941	1.46578	0.648243	-0.110779	0.358662	-0.506933	0.832076	-0.047322	-0.118236		-0.0079	0.017322	1.10121	-0.1512	0.545369	1.33964	0.259007	0.092577	0.089255	0.013215	0.585901	0.159451		0.804549	0.342947	0.624249	0.233605	0.369757	0.327204	-0.14994	-0.00333	-0.30167	0.09238
1.81514	-0.436799	0.819316	0.603821	0.707604	2.85003	1.19493	-0.460798	-0.1033	-0.153256	0.479695	1.345	0.557122		0.405487	-0.350321	0.802204	-0.05926	1.76798	0.686164	-0.221509	0.508407	-0.412827	1.24634	-0.302266	-0.052961		0.014324	-0.02614	1.11955	-0.22353	0.515364	1.42446	0.17887	0.090687	0.211419	0.039204	0.72468	0.121802		0.734248	0.015748	0.639643	0.325829	0.440321	0.490283	-0.10931	0.099749	-0.14261	0.520504
1.86638	-0.503375	0.883983	1.55866	0.819071	2.372	1.01756	-0.3592	-0.273175	-0.460602	-0.082284	1.22771	1.01921		0.397391	0.131625	0.818251	-0.124002	1.8888	0.54907	-0.268977	0.720226	-0.723245	1.07339	0.36335	0.42677		-0.01756	0.062307	1.16715	-0.05422	0.56269	1.01723	0.508672	0.033639	0.103314	0.068989	0.700486	0.124573		0.723813	0.203672	0.594429	0.408788	0.493591	0.288936	-0.16405	0.009	-0.3824	0.401961
1.91762	-0.401366	0.786137	1.09518	0.934	2.17262	0.941769	-0.422992	-0.325567	-0.120843	0.0440373	0.867202	0.950709		0.407559	-0.105997	0.594987	-0.128514	1.60909	0.534027	-0.300608	0.322816	-0.706379	0.964678	0.110009	0.395625		-0.01822	-0.33091	1.22308	-0.10829	0.475588	1.02532	0.562004	0.063876	-0.00592	0.025357	0.796713	0.149467		0.661522	0.103001	0.957974	0.343954	0.466151	0.309251	-0.13886	-0.03748	-0.27779	0.324841
1.96886	-0.414552	0.892604	1.4572	0.978013	2.12186	0.870326	-0.482515	-0.523655	-0.232045	0.0635506	0.780635	0.824506		0.36767	-0.388023	0.570696	-0.247773	2.03171	0.097505	-0.372518	0.363082	-0.569629	0.729455	-0.081456	0.529778		-0.05646	-0.38232	1.30097	0.0318	0.507251	0.897055	0.387864	0.148162	0.138424	0.128503	0.647314	0.585185		0.543064	0.022696	0.529675	0.329575	0.398225	0.222149	-0.24876	-0.05811	-0.17098	0.207018
2.0201	-0.329841	0.98441	1.62284	0.845578	2.00746	1.19994	-0.396945	-0.246753	0.0141067	-0.210727	0.696695	0.422972		0.320735	0.0838283	0.305812	-0.287996	1.42689	0.527636	-0.281732	0.387906	-0.885522	1.00683	-0.205771	0.503633		-0.08199	-0.29536	1.1902	0.12084	0.255864	0.815456	0.237516	0.094643	0.328449	-0.20313	0.573281	0.176604		0.397964	-0.05243	0.775038	0.495107	0.29836	0.115489	-0.18887	0.042694	-0.12439	0.160503
2.07134	-0.468841	0.706975	1.44954	1.11991	2.29272	1.36616	-0.457263	-0.505027	0.0640262	0.0018068	0.439341	0.273692		0.313007	-0.113721	0.584409	-0.330444	1.43476	0.602348	-0.267658	0.317914	-0.709753	0.417668	0.392078	0.506282		-0.03476	-0.33385	1.01435	0.012586	0.448448	0.603022	0.288249	0.022574	0.2204	0.023493	0.642727	-0.00896		0.425888	-0.07961	0.444616	0.440412	0.257561	0.123149	-0.20063	0.106508	-0.19107	0.061039
2.12259	-0.434641	0.795499	1.45184	0.644127	1.98766	1.60236	-0.475456	-0.532218	-0.30183	-0.50464	0.482694	0.0469175		0.455251	0.309894	0.702817	-0.262553	1.45377	0.945076	-0.167161	0.383661	-0.495454	0.908728	-0.232405	0.146511		-0.03243	-0.49903	0.891831	0.033818	0.371026	1.01253	0.269936	-0.06859	0.078477	-0.03814	0.48816	0.18102		0.377985	-0.25302	0.735738	0.596105	0.184896	0.248961	-0.28417	0.164845	-0.1514	-0.14156
2.17383	-0.412785	0.573739	1.09342	0.704416	1.59285	1.55841	-0.525724	-0.464222	-0.190601	-0.539172	0.521055	0.551045		0.482653	0.433547	0.610657	-0.352047	1.91947	0.521647	-0.424092	0.27768	-0.374299	0.809859	-0.188851	0.0893217		-0.05347	-0.44337	1.02635	0.195319	0.451185	1.14153	0.242537	0.045639	0.104425	-0.02744	0.652036	0.24123		0.417851	-0.01767	0.585546	0.612568	0.260124	0.37597	-0.24921	0.022801	-0.26693	-0.15004
2.22507	-0.430612	0.0674522	0.953747	0.460641	1.84579	1.12959	-0.414272	-0.303789	-0.283009	-0.512873	0.313494	0.148333		0.470066	0.128175	0.271309	-0.199239	1.54368	0.60846	-0.429843	0.507413	-0.086759	0.791892	-0.138977	0.15807		-0.05584	-0.35782	0.800223	-0.02461	0.452066	1.53579	0.260941	-0.11031	-0.03562	-0.02039	0.324633	0.123103		0.258774	-0.07743	0.513439	0.529176	0.188303	0.162674	-0.2255	0.149911	-0.20339	0.114332
2.27631	-0.35386	0.0637909	0.996552	0.391054	1.48973	1.03099	-0.481691	-0.337569	-0.333855	-0.034828	0.482835	0.174151		0.447049	0.071635	0.390911	-0.112647	1.60788	0.190353	-0.540683	-0.063819	-0.288398	0.780913	-0.188263	0.0912346		0.005304	-0.39298	0.639444	0.071752	0.527934	1.72058	0.2263	-0.02586	0.195942	-0.03991	0.380443	-0.28596		0.219356	-0.14785	0.506954	0.728613	0.106911	0.355829	-0.11172	-0.01956	-0.13094	0.105463
2.32755	-0.611737	-0.113324	0.669143	0.194666	1.0752	1.0442	-0.343693	-0.253992	-0.116435	-0.263886	0.568468	0.210128		0.441726	0.381549	0.147409	-0.371225	1.58406	0.404416	-0.525471	-0.226924	-0.421235	0.474118	-0.186488	-0.110739		-0.05008	-0.26367	0.783617	-0.22695	0.376352	1.80967	0.201948	0.01478	-0.06808	-0.14605	0.363033	-0.34988		0.295666	-0.05992	0.437994	0.784121	0.129396	0.043529	-0.1171	-0.14351	-0.37788	0.062964
2.37879	-0.547957	-0.072821	0.698182	0.568309	1.25527	1.11782	-0.517776	-0.173809	-0.285318	-0.347456	0.663123	-0.061218		0.501074	-0.094605	0.242363	0.0848803	1.25586	0.530379	-0.428299	0.402817	-0.720596	0.893942	-0.203152	-0.069328		-0.05811	-0.23703	1.00507	-0.10741	0.519158	1.67762	0.081704	0.028946	0.084465	-0.00327	0.327589	-0.33173		0.186144	-0.18376	0.416942	0.821318	-0.09939	0.245525	-0.24972	0.018113	-0.03864	-0.00188
2.43004	-0.581931	0.0497548	0.708166	-0.009264	1.38141	0.629416	-0.472891	-0.001057	-0.595291	-0.341241	0.623825	-0.130805		0.497049	-0.05978	0.147673	-0.161064	1.39716	0.222563	-0.371537	0.0283413	-0.647872	0.887725	-0.203181	-0.05386		0.107967	-0.19104	0.975558	0.081149	0.478287	1.05588	0.221974	0.233728	-0.05533	-0.08178	0.523911	-0.24514		0.082472	-0.05797	0.287661	0.770856	-0.01631	0.088842	-0.2114	-0.09151	-0.13589	0.14357
2.48128	-0.529575	0.451595	0.673887	0.263218	1.1372	0.843734	-0.472911	-0.231192	-0.300039	-0.459087	0.716991	-0.067276		0.488831	0.397324	0.236414	-0.111828	1.31378	0.0134961	-0.482777	0.0889325	-0.147671	0.340543	0.157163	0.120768		0.228381	-0.20533	1.04472	0.018037	0.381303	1.02594	0.084299	0.272699	0.061311	-0.0566	0.701775	-0.22311		-0.02097	-0.20552	0.201864	0.88667	-0.06637	0.280236	-0.27498	-0.19907	0.059497	0.14385
2.53252	-0.488994	0.379938	0.454736	-0.053776	1.20029	0.620677	-0.421539	-0.205901	-0.07797	-0.483388	0.580561	-0.215296		0.547518	-0.078083	0.0463282	-0.230508	1.61499	0.264852	-0.458052	-0.000899	-0.494966	0.835626	-0.30141	-0.292183		0.164157	-0.2013	0.941831	-0.07169	0.513382	0.85092	0.00054	0.332263	-0.13554	-0.07141	0.71062	0.185483		-0.02597	-0.25963	0.72924	0.749948	-0.11156	0.478739	-0.3158	-0.27099	0.211175	0.018693
2.58376	-0.436635	0.242263	0.22557	-0.112898	1.13251	1.20444	-0.219267	-0.502119	-0.268733	-0.493092	0.250326	0.147598		0.552694	-0.107814	0.0589489	-0.004213	1.25454	0.312341	-0.544437	0.149514	-0.387382	0.39657	0.0605118	-0.053382		0.092222	-0.13178	0.775926	-0.04353	0.511098	0.532466	0.022102	0.278685	0.116517	0.13991	0.513119	0.274599		0.057421	-0.24955	0.556933	0.758265	-0.08765	0.753647	-0.41537	-0.21068	-0.13359	-0.15381
2.635	-0.502627	-0.002855	0.122682	0.176645	1.14722	0.996125	-0.367391	-0.15594	-0.334104	-0.712953	0.336444	-0.076168		0.684979	-0.457225	0.0998749	0.147103	0.874003	0.256309	-0.667681	0.581466	-0.438749	0.118308	-0.248878	0.282826		0.059543	-0.37786	0.575886	-0.33357	0.33463	0.748021	-0.02481	0.34602	0.098711	-0.12591	0.366149	0.07222		-0.12284	-0.20992	0.742443	0.855465	-0.11861	0.617793	-0.42245	-0.39638	0.093634	-0.05281
2.68624	-0.538549	-0.156878	0.243326	0.139493	1.09105	0.933432	-0.283427	0.0221849	-0.082541	-0.304261	0.123954	-0.0452		0.741235	-0.431766	0.506258	-0.175076	1.1342	0.0027434	-0.618978	-0.051065	-0.34073	0.101454	-0.003669	0.141608		0.060789	-0.536	0.54138	-0.30494	0.310998	0.617747	0.07295	0.340328	0.359114	-0.22238	0.387012	0.268694		-0.05693	-0.2803	0.540327	0.459762	0.129086	0.683289	-0.41213	-0.38337	0.145597	-0.12196
2.73748	-0.411055	-0.24485	0.262959	0.150381	1.03248	0.892371	-0.319981	-0.075656	-0.168385	-0.152083	-0.270117	-0.0066		0.760512	-0.197977	0.346953	-0.224041	0.949208	0.0024731	-0.422685	0.361086	-0.42702	-0.314098	-0.199667	-0.170129		0.051502	-0.46143	0.568264	-0.38035	0.236455	0.562894	-0.02271	0.29848	0.160832	-0.19382	0.342679	0.024279		-0.12559	-0.2747	0.703268	0.763039	0.143073	0.641339	-0.47867	-0.296	-0.10696	-0.14719
2.78873	-0.624375	-0.380352	0.900376	-0.304046	0.89944	0.850746	-0.381808	-0.140499	0.0113409	-0.209917	0.159682	0.289351		0.564119	-0.275736	0.381812	0.146571	0.870385	0.269804	-0.375141	0.274145	-0.610207	0.200478	-0.319944	-0.007284		-0.05896	-0.37919	0.482617	-0.21074	0.381885	0.498446	0.126163	0.291944	0.323478	-0.28987	0.354436	0.063164		-0.11653	-0.34404	0.555512	0.644745	0.152222	0.494583	-0.48365	-0.30278	0.204668	-0.37095
2.83997	-0.680999	-0.463384	0.37846	-0.191125	0.891895	0.807926	-0.319031	-0.083635	0.149983	-0.587395	0.152405	0.0727583		0.551338	-0.283376	0.486847	-0.222999	0.869818	0.432898	-0.503031	0.344308	-0.381468	0.316734	-0.540193	-0.381724		0.134214	-0.19271	0.558511	-0.38533	0.384694	0.673693	0.240148	0.204001	0.30663	-0.41931	0.318008	0.103897		-0.14644	-0.32401	0.749343	0.63472	0.04175	0.297142	-0.41659	-0.46371	0.083455	-0.28374
2.89121	-0.552562	-0.368815	0.660475	-0.21812	1.02943	0.78855	-0.393293	-0.010705	0.0112543	-0.569526	0.0214079	-0.187114		0.560521	-0.508222	0.258307	-0.357088	0.860398	0.604364	-0.419723	0.562137	-0.014781	0.166225	-0.336144	-0.111244		0.088242	-0.31703	0.78504	-0.29631	0.269786	0.799894	0.114763	-0.00684	0.221763	-0.3859	0.437439	-0.22995		-0.11419	-0.38941	0.537201	0.464569	0.171854	0.110486	-0.32938	-0.03016	0.369797	-0.40705
2.94245	-0.670433	-0.410413	0.593379	-0.034684	1.36681	0.498398	-0.310581	-0.156459	0.0784926	-0.697845	-0.11646	0.0377659		0.559195	-0.228347	0.134074	-0.356595	1.17521	0.638622	-0.470034	0.205068	-0.19587	-0.139845	-0.576043	-0.472067		0.051256	-0.15378	0.587033	-0.22045	0.380145	0.609934	0.171015	0.039759	0.097599	-0.2414	0.424644	-0.07147		-0.08145	-0.33875	0.371749	0.465437	0.057587	0.249677	-0.27885	0.007721	0.100637	-0.17174
2.99369	-0.522074	-0.455305	0.0559214	-0.243259	1.41795	0.500676	-0.123936	-0.187566	-0.308328	-0.5463	0.151001	0.0633545		0.682085	-0.387074	0.590065	-0.463928	0.821235	0.326836	-0.524436	0.45026	0.0314248	0.160454	-0.634928	-0.10897		0.046399	-0.43284	0.763919	-0.43423	0.165207	0.47608	-0.02753	-0.10266	0.307767	-0.18993	0.471687	-0.17217		0.101468	-0.40222	0.724913	0.424814	0.150323	-0.05643	-0.28861	0.066122	0.322424	-0.26574
3.04494	-0.478978	-0.341418	-0.011328	-0.226317	1.60567	0.399005	0.136195	-0.41925	0.380532	-0.212629	0.0547376	-0.29136		0.842412	-0.103358	0.0717602	0.0120147	1.05595	-0.15757	-0.555751	0.0142782	-0.14689	0.0231291	-0.231441	-0.439432		-0.01614	-0.36074	0.617188	-0.41712	0.095868	0.536127	-0.1538	-0.03625	0.206293	-0.09129	0.476428	-0.24691		0.037015	-0.44223	0.648834	0.344679	0.081793	-0.20221	-0.27502	-0.0776	-0.01814	-0.44844
3.09618	-0.532945	-0.031193	0.230755	0.132758	1.41716	0.667505	0.076062	-0.212061	0.167886	-0.414494	-0.053476	0.101795		0.700196	0.212747	0.252116	-0.043536	0.937555	-0.225174	-0.550149	-0.069652	0.592859	-0.038643	-0.152101	-0.445369		-0.04406	-0.48087	0.617101	-0.27642	-0.00641	0.698412	-0.0354	-0.3451	0.273557	-0.10831	0.457022	-0.07796		0.077472	-0.43387	0.790784	0.447259	0.110148	-0.20305	-0.31502	-0.10657	0.279131	-0.29607
3.14742	-0.327918	0.0298188	-0.234767	-0.053324	1.05119	0.446863	-0.087561	-0.469345	-0.012525	-0.131092	0.0379733	-0.307567		0.763342	-0.05445	0.530777	-0.216907	0.667319	0.0659015	-0.685971	-0.028189	0.565983	0.13096	-0.164159	0.0492167		-0.04216	-0.49377	0.546034	-0.27396	0.246719	1.02787	-0.06601	-0.23875	0.464451	-0.20678	0.448513	-0.10275		0.055413	-0.43031	0.906484	0.199015	0.100445	-0.13153	-0.35308	-0.1708	0.552628	-0.19438
3.19866	-0.304178	0.233098	0.108469	-0.027198	1.21987	0.291315	-0.218165	-0.370036	0.0814015	-0.148002	0.0746033	-0.017638		0.744748	0.0057197	0.436987	-0.50671	1.04523	-0.40242	-0.581441	-0.019082	0.174226	0.2089	0.232893	-0.465703		-0.19396	-0.57613	0.587583	-0.32011	0.402758	1.02658	0.001348	-0.39375	0.20801	-0.04215	0.421164	-0.20642		0.116099	-0.34142	0.547647	0.46247	0.192733	-0.16805	-0.30595	-0.18736	0.348743	-0.07184
3.2499	-0.455174	0.131477	-0.010548	0.146993	1.38769	0.341966	-0.3174	-0.431617	-0.132845	-0.40424	0.082957	0.082757		0.599734	-0.103854	0.419867	-0.142582	1.11017	-0.146238	-0.574771	0.0026041	0.0538785	0.0386018	-0.385281	-0.190202		-0.22252	-0.40435	0.327962	-0.2416	0.440004	0.910258	0.047266	-0.35496	0.158504	0.050959	0.373892	-0.05841		0.114229	-0.30177	0.734774	0.402714	-0.13669	0.010731	-0.38704	-0.10222	0.639904	-0.02698
3.30114	-0.319352	0.321008	0.250853	0.211992	1.43142	-0.067936	-0.230527	-0.415356	0.284664	-0.095001	0.126714	0.5653		0.544129	0.1311	0.524564	-0.728128	1.05367	-0.109779	-0.615348	-0.328331	0.237483	0.255317	-0.559168	0.0940146		-0.17435	-0.39641	0.793891	-0.49846	0.423592	0.928296	-0.10485	-0.40589	-0.00349	0.137654	0.28117	0.173797		0.439887	-0.29859	0.527002	0.199527	0.002273	0.034778	-0.42637	-0.12821	0.347887	-0.16643
3.35238	-0.354208	0.407382	-0.047269	-0.154707	1.41952	-0.375608	-0.294243	-0.687214	0.003237	-0.446512	0.112662	0.385525		0.483972	0.0132117	0.592609	-0.417135	0.735331	-0.073647	-0.505199	0.250183	0.407748	0.0729744	-0.174171	0.440051		-0.25563	-0.38245	1.08569	-0.16367	0.461694	0.798729	-0.05166	-0.23766	0.320165	-0.00359	0.362827	0.037366		0.46465	-0.29901	0.363499	0.292859	-0.02025	0.047896	-0.36685	-0.17178	0.448126	-0.17576
3.40363	-0.539272	0.206087	-0.116398	-0.104116	1.14807	0.0250463	-0.340356	-0.417112	0.184994	-0.426913	0.105802	0.553381		0.569353	0.0213334	0.861471	-0.476757	0.787339	0.277033	-0.633926	0.186651	-0.307618	-0.194777	-0.393299	0.78406		-0.24969	-0.31809	0.721139	-0.23893	0.582024	1.07167	-0.06197	-0.2737	0.250723	-0.04102	0.317691	-0.12607		0.485539	-0.30911	0.604214	0.324712	0.055199	0.061317	-0.34656	-0.34777	0.509907	0.080335
3.45487	-0.552112	0.403815	-0.06172	-0.189512	1.20199	-0.079973	-0.268894	-0.287257	0.0649257	-0.202908	0.0954918	0.39511		0.532485	-0.052494	0.576409	-0.221782	0.805235	0.335083	-0.634602	-0.192959	-0.102358	-0.197695	-0.724531	0.33502		-0.24561	-0.21168	0.552401	-0.08492	0.470576	1.00286	0.003441	-0.28917	-0.14137	-0.05156	0.244486	0.131582		0.447428	-0.30453	0.193739	0.42452	-0.00277	0.037639	-0.36135	-0.26067	0.625936	0.038906
3.50611	-0.525699	0.614898	-0.313988	0.029465	1.01521	-0.173047	-0.308019	-0.034404	0.231956	-0.232287	0.0837809	0.603379		0.321794	-0.017734	0.860454	-0.539091	1.12723	0.252625	-0.633282	-0.426677	-0.254422	0.343571	-0.499414	0.267139		-0.04402	-0.46419	0.767254	-0.2928	0.383632	0.724098	0.065416	-0.0996	0.190094	-0.00065	0.228411	0.014927		0.379801	-0.39612	0.474488	0.169019	-0.02385	0.054928	-0.47307	-0.22672	0.645937	0.110221
3.55735	-0.639621	0.316666	-0.146666	0.121061	0.99068	0.0035256	-0.277377	-0.217474	-0.132691	-0.706101	-0.188592	0.429691		0.381656	0.013114	0.366725	-0.30239	1.26574	-0.177467	-0.759739	-0.141081	-0.196632	0.360358	-0.630612	0.0797007		-0.04349	-0.42534	0.396975	-0.16375	0.28248	0.65154	0.056519	-0.19524	0.155569	0.032878	0.138292	-0.0668		0.461837	-0.34216	0.609184	0.153823	-0.23843	-0.01393	-0.49818	-0.26149	0.419292	-0.03467
3.60859	-0.688688	0.214141	-0.453808	-0.012383	0.891818	-0.027436	-0.332246	-0.041229	-0.050225	-0.181688	-0.299223	0.196236		0.449942	-0.210576	0.734358	-0.394456	1.64012	0.0252513	-0.608381	-0.175663	-0.484018	0.124536	-0.410644	-0.074497		-0.0833	-0.26678	0.652148	-0.13825	0.212617	0.865013	0.046008	-0.08337	0.004812	-0.03395	0.273096	0.268466		0.408184	-0.31337	0.426183	0.209281	-0.24305	-0.01162	-0.42991	-0.29756	0.385554	-0.11516
3.65983	-0.491977	-0.288129	0.137892	-0.125192	1.22335	0.454682	-0.329204	0.0970889	-0.011927	-0.562774	-0.132558	-0.420636		0.49242	-0.402811	0.680449	-0.746212	1.40092	-0.421675	-0.611613	-0.414414	-0.090173	-0.045859	-0.127897	-0.130851		0.007065	-0.51826	0.678329	-0.18236	0.345382	0.95776	-0.02004	-0.18245	0.139859	-0.11552	0.25553	0.044198		0.2972	-0.27966	0.656388	0.284686	-0.0937	0.163666	-0.31295	-0.19703	0.4124	0.012864
3.71108	-0.645535	-0.141046	-0.270735	-0.223811	1.79992	0.0519472	-0.383619	-0.136348	-0.325043	-0.404786	0.0121679	-0.051107		0.449537	-0.518129	0.702041	-0.485243	1.48386	-0.050033	-0.433305	-0.312775	-0.47939	-0.251953	-0.536105	0.105216		-0.00072	-0.52279	0.805397	-0.24798	0.583462	0.612194	-0.02111	-0.25062	-0.07054	-0.19952	0.062725	-0.0193		0.424147	-0.13019	0.603517	0.222762	-0.16545	0.05117	-0.36531	-0.16557	0.550233	-0.17627
3.76232	-0.568164	-0.230069	0.522021	-0.407941	2.30001	-0.083129	-0.430684	0.146969	0.0564543	-0.85428	-0.121509	0.150512		0.355861	-0.521593	0.906101	-0.466455	1.51929	-0.493146	-0.592441	-0.295505	-0.187102	-0.169719	-0.49037	0.245187		-0.01565	-0.51594	0.497402	-0.35073	0.408909	0.389158	-0.00555	-0.25379	0.11272	-0.1073	0.134834	0.151405		0.28831	-0.21447	0.543781	0.296923	-0.13888	-0.0747	-0.38607	-0.18269	0.459932	0.130079
3.81356	-0.38749	-0.494161	-0.02805	-0.45811	1.97484	-0.265471	-0.505173	-0.091498	-0.035586	-0.66153	-0.163488	-0.258908		0.149016	-0.603933	0.406835	-0.467313	1.37092	-0.493188	-0.523093	-0.372062	-0.102564	-0.289719	-0.333478	-0.115149		0.141196	-0.55055	0.645187	-0.11268	0.470536	0.39891	0.059094	-0.2358	0.318405	-0.22358	0.105959	0.342457		0.186326	-0.27452	0.421329	0.150819	-0.1623	0.13536	-0.48022	0.055089	0.412936	-0.05293
3.8648	-0.482631	-0.133612	0.241268	-0.581512	1.35917	-0.160549	-0.493565	0.131431	-0.25711	-0.742238	-0.035026	-0.285084		0.117812	-0.515092	0.448124	-0.243959	1.08406	-0.515333	-0.549064	-0.284659	0.0747675	-0.356592	-0.181828	-0.3408		0.209984	-0.64618	0.445358	-0.18898	0.400488	0.403084	0.046797	-0.21695	0.178368	-0.16829	0.279767	0.049954		0.184039	-0.35164	0.381153	0.349132	-0.10619	-0.08554	-0.37602	0.052972	0.335037	-0.07094
3.91604	-0.562059	-0.283896	0.306578	-0.440025	1.2625	0.0310288	-0.424338	0.213413	-0.182622	-0.757029	0.248304	-0.449273		0.155251	-0.411294	0.348561	-0.456809	1.07343	-0.458428	-0.365471	-0.309091	-0.277405	-0.138741	-0.197488	-0.203282		0.262729	-0.59535	0.479085	-0.29189	0.233069	0.647483	-0.06011	-0.08752	0.224774	0.118277	0.283299	0.201436		0.298335	-0.33679	0.067192	0.369115	-0.2544	0.078881	-0.29481	0.044246	0.610878	-0.02476
3.96728	-0.572252	-0.403037	-0.078915	-0.530802	1.22746	-0.432125	-0.487932	-0.043529	-0.00379	-0.91363	0.0962544	-0.307003		0.195965	-0.279058	0.704727	-0.42586	1.53504	-0.32641	-0.471055	0.111725	0.215437	-0.062006	-0.837943	0.0811673		0.375097	-0.6237	0.259233	-0.15293	0.277132	0.503629	-0.08055	-0.1948	0.068255	0.064216	0.146118	0.255553		0.340804	-0.34656	0.281036	0.499357	-0.20898	0.128737	-0.41573	0.057902	0.657514	-0.03876
4.01853	-0.595929	-0.229366	0.003013	-0.287909	1.39994	0.111226	-0.520857	-0.232646	-0.339042	-0.754325	0.512722	0.153087		0.192605	-0.347592	0.478939	-0.132408	1.01043	-0.155011	-0.529429	-0.524354	0.235367	-0.194703	-0.091215	-0.029183		0.382479	-0.70824	0.708548	-0.50806	0.371382	0.603965	-0.05815	-0.14343	0.379702	0.127774	0.119564	0.322532		0.282689	-0.33534	0.13689	0.681611	-0.17412	0.056778	-0.29968	0.097923	0.748951	-0.02429
4.06977	-0.580305	-0.006813	-0.253965	-0.564252	1.79242	-0.184425	-0.54184	-0.263116	-0.749737	-1.00143	0.382109	-0.13176		0.200629	-0.206683	0.724179	-0.629518	1.20465	0.0856847	-0.229168	-0.301582	0.0481931	-0.139883	-0.06128	-0.131657		0.359059	-0.76652	0.645009	-0.39737	0.402606	0.315201	-0.06465	-0.02126	0.222878	0.285136	0.047832	0.154511		0.356958	-0.27794	0.120785	0.688083	-0.3195	0.1089	-0.18408	-0.02628	0.716567	-0.24187
4.12101	-0.516261	-0.139176	-0.301323	-0.227619	1.62745	0.554064	-0.445911	-0.274523	-0.346302	-0.838393	0.424054	0.16467		0.261049	-0.35962	0.308849	-0.64656	1.2293	-0.350631	-0.39944	0.209114	-0.234376	-0.125343	-0.213068	-0.078921		0.342663	-0.80201	0.56063	-0.09719	0.504707	0.644768	0.023511	0.116696	0.392212	0.211365	0.129683	0.343755		0.395761	-0.25475	0.226474	0.412589	-0.26065	0.221798	-0.27342	-0.0559	0.753412	-0.24854
4.17225	-0.471832	-0.0243	-0.264464	-0.187591	2.08297	0.183602	-0.542366	-0.096435	0.0150115	-0.976724	0.389217	0.168008		0.336507	-0.249941	0.664381	-0.516342	0.971572	-0.289798	-0.410932	0.0754967	-0.260571	0.0791849	0.146511	-0.029271		0.291621	-0.72882	0.873325	-0.26045	0.375811	1.02997	-0.01343	-0.09631	0.250795	0.139058	0.128111	0.22599		0.458474	-0.29696	0.152816	0.568731	-0.35337	0.066106	-0.25251	-0.03796	0.654663	-0.32741
4.22349	-0.410898	0.101277	-0.351139	-0.130453	1.64418	0.0102125	-0.613145	-0.048783	-0.425152	-0.963722	0.0038356	0.15385		0.138994	-0.528818	0.35536	-0.453499	0.831138	-0.392024	-0.467142	0.0940555	-0.226372	-0.044688	-0.405013	-0.056121		0.186061	-0.92653	0.649719	-0.25258	0.555379	1.01431	-0.02214	-0.0672	0.309963	0.178289	0.257158	-0.16447		0.47795	-0.22712	0.156787	0.230491	-0.27375	-0.06479	-0.35342	0.018876	0.197454	-0.33414
4.27473	-0.340943	0.499423	-0.070107	-0.407921	1.33575	0.0606432	-0.402121	-0.308916	-0.237526	-0.365712	-0.249179	-0.011617		0.232559	-0.571212	0.42108	-0.197837	1.26245	-0.148101	-0.447218	0.0525738	-0.271885	-0.187409	-0.506717	-0.1167		0.192997	-0.72527	0.647459	-0.38801	0.542949	0.750517	-0.14558	-0.12653	0.44882	0.251395	0.08195	-0.1222		0.590582	-0.48985	0.096144	0.358867	-0.37841	-0.06095	-0.27296	0.091992	0.586871	-0.32491
4.32598	-0.452004	0.47036	-0.579217	-0.080049	1.07324	0.260703	-0.324354	-0.152999	-0.401199	-0.487855	-0.260633	-0.00479		0.227132	-0.621697	0.752537	0.0389522	0.941912	-0.232891	-0.484966	-0.223901	-0.282942	0.184146	-0.235424	-0.135221		0.190212	-0.75882	0.83777	-0.38106	0.425924	1.03649	-0.02027	-0.13295	0.433935	0.181693	0.145481	-0.45073		0.688869	-0.19546	0.31449	0.236855	-0.282	-0.09551	-0.34286	0.275367	0.582402	-0.22763
4.37722	-0.603569	0.396987	-0.53858	-0.292778	0.927647	0.0394372	-0.287011	-0.087661	-0.257835	-0.454817	0.116371	-0.277553		0.196158	-0.366707	0.746421	0.282541	0.813531	-0.270056	-0.545454	-0.45235	-0.199321	0.232362	-0.430287	-0.028701		0.340991	-0.86487	0.705243	-0.43521	0.354688	0.937698	-0.04059	-0.10798	0.501548	0.008149	0.013932	-0.49513		0.512698	-0.2718	0.225428	0.270035	-0.19458	-0.09968	-0.27647	0.351067	0.642871	-0.15423
4.42846	-0.75327	0.131491	-0.095267	-0.215492	1.11741	-0.13287	-0.341616	-0.109993	-0.186462	-0.292249	0.196076	-0.152063		0.0996853	-0.499329	0.795186	0.0346765	1.1555	0.128927	-0.425518	-0.314014	-0.075186	-0.063912	-0.320122	-0.244387		0.262264	-0.82753	0.493942	-0.55479	0.224977	0.624319	-0.13029	-0.18117	0.567611	0.2643	0.277077	-0.2741		0.451822	-0.41592	0.113344	0.507049	-0.0059	-0.17084	-0.35346	0.496084	0.489029	-0.17898
4.4797	-0.690015	0.106506	-0.325269	-0.426055	0.760263	-0.231968	-0.224472	-0.297502	-0.422186	-0.457498	0.267023	-0.201446		0.205702	-0.607033	0.962296	0.385328	1.3422	-0.039681	-0.420709	0.132761	0.069151	-0.111675	-0.741972	-0.179226		0.486682	-0.77078	0.406521	-0.511	0.431872	0.720435	-0.11506	-0.25046	0.396076	-0.04458	0.377605	-0.38972		0.42649	-0.27788	0.192078	0.343248	-0.26231	0.028058	-0.34691	0.314306	0.424258	-0.09529
4.53094	-0.717646	-0.094636	-0.563081	-0.445287	1.194	0.333465	-0.281189	-0.110396	-0.421777	-0.534337	-0.111318	-0.309392		0.207605	-0.850401	0.845542	0.307084	1.35172	-0.232605	-0.505698	0.0750166	-0.156598	-0.271355	-0.580287	-0.140212		0.745753	-0.77237	0.427928	-0.44126	0.541692	0.238657	-0.10659	-0.09288	0.571683	0.097231	0.441643	-0.34696		0.364764	-0.29126	0.228781	0.322249	-0.24005	0.021114	-0.43074	0.27525	0.414926	-0.26066
4.58218	-0.70284	-0.124273	-0.291834	-0.305766	0.973044	-0.228466	-0.085445	-0.060908	-0.217834	-0.495279	-0.118196	-0.479235		0.336779	-0.715254	0.384196	0.153313	1.32607	-0.207021	-0.290867	0.146592	-0.103412	-0.134953	-0.493415	-0.138457		0.892895	-0.70461	0.341511	-0.43975	0.341461	0.376792	-0.07449	-0.37272	0.522731	0.029564	0.35534	-0.35258		0.438677	-0.48463	0.14181	0.10699	-0.26578	-0.01303	-0.34603	0.334619	0.396005	-0.31959
4.63342	-0.680097	-0.314627	-0.264241	-0.254344	1.15196	0.27421	-0.31861	-0.222503	-0.634376	-0.514929	-0.039782	-0.085522		0.344211	-0.743689	-0.399635	0.384756	1.36313	-0.165168	-0.444437	0.674856	-0.308272	-0.344363	-0.094837	-0.253535		1.02007	-0.67067	0.32769	-0.5177	0.30779	0.344418	-0.10652	-0.22895	0.635818	-0.07667	0.34592	-0.45619		0.379969	-0.44865	0.08656	0.118363	-0.3	0.04033	-0.35664	0.200918	0.373485	-0.37075
4.68467	-0.660228	-0.189759	-0.135092	-0.216187	1.36098	0.408477	-0.28848	-0.075425	-0.209741	-0.761034	0.223796	0.0914597		0.42676	-0.792762	0.382532	0.221946	1.26073	-0.065465	-0.487889	-0.019191	-0.569276	0.221797	0.0492365	-0.002979		1.09551	-0.81064	0.521496	-0.54074	0.070212	0.403552	-0.10635	-0.30247	0.169743	0.028115	0.399614	-0.3071		0.348594	-0.34955	0.379185	0.216555	-0.31126	0.13016	-0.26926	0.435344	0.15063	-0.03389
4.73591	-0.519893	-0.291679	-0.657395	-0.20304	0.98894	0.660287	-0.261249	-0.192186	-0.120372	-0.359531	0.0374889	-0.083839		0.399351	-0.885563	0.447129	0.310912	1.44457	-0.062151	-0.736608	0.0915657	0.130456	-0.113269	0.15109	-0.165385		1.11246	-0.58935	0.38888	-0.49495	0.07756	-0.05874	-0.11657	-0.31088	0.143045	-0.07281	0.250303	-0.45315		0.440278	-0.46937	0.289965	0.236905	-0.10553	0.306214	-0.31091	0.315654	0.283145	-0.04998
4.78715	-0.674428	-0.234691	-0.452757	-0.420713	0.815548	0.457423	-0.321661	-0.145924	-0.263628	-0.296969	0.283302	0.0893281		0.545803	-0.669344	0.256857	0.0688672	1.13594	-0.19728	-0.636924	-0.22515	-0.022958	0.196467	0.290185	-0.135871		1.069	-0.36571	0.332208	-0.41483	0.109949	0.323647	-0.09127	-0.31474	0.364391	0.00418	0.230422	-0.04389		0.290612	-0.44662	0.311114	0.279874	-0.11802	0.242939	-0.28867	0.218714	0.431723	-0.16499
4.83839	-0.649931	-0.336493	-0.588034	0.0843791	0.900168	0.353916	-0.418236	-0.396558	-0.076781	-0.261473	0.371609	0.334575		0.644919	-0.560064	0.463125	0.213467	1.17788	0.0522354	-0.504992	-0.157867	0.0082316	0.0233255	0.16342	-0.476128		0.75897	-0.73009	0.61487	-0.42019	0.212417	-0.02268	-0.15933	-0.49046	0.274111	-0.04502	0.103893	-0.2804		0.322246	-0.60581	0.162784	0.485267	-0.18569	0.143702	-0.2171	0.351276	0.290688	-0.27412
4.88963	-0.598071	-0.129379	-0.336961	-0.22931	0.536601	0.194909	-0.255241	-0.42618	0.0732749	0.17927	0.0325215	0.189851		1.08638	-0.365986	0.729133	0.424918	1.04722	-0.019407	-0.55855	0.0499141	-0.102273	-0.061458	0.0147759	0.0308301		0.694058	-0.64757	0.770812	-0.69152	0.058125	-0.06007	-0.18924	-0.52524	0.570078	-0.32854	0.250664	-0.24745		0.318332	-0.56308	0.418883	0.594332	0.051651	0.145497	-0.26277	0.243535	0.184711	0.019631
4.94088	-0.404326	-0.14501	-0.594156	-0.004536	0.835753	0.365742	-0.422	-0.535375	0.181985	0.276916	0.141543	0.325448		0.911349	-0.391614	0.53973	0.0423587	1.25692	-0.282029	-0.400247	0.157784	-0.10137	0.101618	-0.117587	-0.225296		0.662663	-0.73376	0.701531	-0.54325	-0.03966	0.206145	-0.06401	-0.50663	0.378177	-0.00445	0.240982	-0.26593		0.294747	-0.43848	0.292712	0.495763	0.146303	0.195929	-0.36195	0.264078	-0.1336	-0.18421
4.99212	-0.359402	0.231067	-0.513654	-0.090892	0.506811	-0.156963	-0.49311	-0.447297	-0.188141	-0.170586	-0.075903	0.144631		0.783619	-0.385597	0.399659	0.262553	1.07109	-0.163023	-0.375744	0.312816	-0.481004	-0.011058	-0.610362	-0.249309		0.54111	-0.82293	0.531328	-0.48546	0.108743	0.157545	0.021948	-0.48091	0.319959	-0.0706	0.149129	-0.63055		0.273999	-0.56807	0.291889	0.553972	-0.14288	0.115449	-0.30332	0.070991	0.002439	-0.17136
5.04336	-0.267987	0.414699	-0.358616	-0.128946	0.416954	-0.427497	-0.371731	-0.392145	-0.240954	-0.121095	-0.270692	0.0826968		0.658434	-0.628494	0.528307	0.238224	1.08711	0.0365307	-0.446962	-0.300689	-0.293948	0.647096	-0.301564	-0.305208		0.519917	-0.77617	0.383099	-0.35114	0.116356	-0.13525	-0.13919	-0.46571	0.339179	-0.02374	0.35151	-0.48964		0.302889	-0.54847	0.366496	0.45611	0.009006	0.095212	-0.30762	-0.00207	0.392342	-0.09343
5.0946	-0.493471	0.175802	-0.289468	0.240713	0.630136	-0.096389	-0.347248	-0.360302	-0.410961	-0.298895	-0.054423	-0.346364		0.575172	-0.124229	0.247967	-0.009998	1.07449	0.227191	-0.414858	0.0703847	-0.434536	0.398185	-0.645178	-0.027998		0.429387	-0.70631	0.539875	-0.52681	0.0344	0.116437	0.022611	-0.45469	0.221815	0.035825	0.187863	-0.23247		0.280672	-0.45461	0.425403	0.291116	0.249359	0.015558	-0.42363	0.034793	0.336013	-0.01189
5.14584	-0.300056	0.518703	-0.273119	-0.190175	0.540759	-0.085617	-0.53114	-0.050325	-0.021965	-0.134108	0.511407	0.20862		0.568437	0.150487	0.207565	-0.006602	0.543533	0.0337546	-0.322902	0.262125	-0.644175	0.184105	-0.528511	0.185756		0.467098	-0.85794	0.686751	-0.30068	-0.07527	-0.18311	-0.02265	-0.35024	0.437214	-0.076	0.293323	-0.01363		0.1604	-0.49773	-0.00805	0.497035	0.275763	0.23323	-0.31617	0.000826	0.44272	-0.17495
5.19708	-0.301072	0.42032	-0.949283	-0.109878	0.781023	0.116074	-0.499536	-0.175239	-0.437294	-0.4157	0.786884	0.113297		0.420013	-0.380603	0.451376	0.123823	0.866463	0.374824	-0.288	0.404465	-0.357652	0.0687867	-0.770864	0.170419		0.417486	-0.93752	0.72949	-0.32996	-0.07928	-0.05657	-0.04316	-0.24323	0.56316	0.087515	0.093713	-0.37098		0.214173	-0.28207	0.148389	0.48867	0.269553	0.156986	-0.399	-0.04806	0.412175	-0.14891
5.24833	-0.469828	0.36077	-0.451147	-0.135504	1.1109	-0.028313	-0.523247	-0.438793	-0.163065	-0.2308	0.98992	-0.027002		0.494488	-0.445869	0.204581	-0.234639	0.857172	-0.075216	-0.39635	0.123252	-0.291432	-0.283531	-0.586255	0.257926		0.376968	-0.60407	0.755687	-0.43493	0.07571	0.063315	-0.00345	-0.33118	0.488864	0.169598	0.304441	-0.52711		0.290163	-0.62695	0.423607	0.386958	0.204224	-0.0675	-0.43852	-0.13449	0.547184	-0.3859
5.29957	-0.374605	-0.075592	-0.212066	0.0856655	0.992313	0.0713219	-0.459685	-0.19876	0.0071202	-0.652732	1.13904	-0.083823		0.51035	-0.074546	0.281081	0.148762	0.936051	0.155919	-0.309063	0.276237	-0.387843	0.001487	-1.02391	0.150277		0.347687	-0.7805	0.780179	-0.35312	-0.18209	0.180834	0.022458	-0.31822	0.795353	0.08075	0.340816	-0.30077		0.140087	-0.65541	0.262386	0.393157	0.241765	0.152794	-0.3016	0.08777	0.418125	0.025796
5.35081	-0.225524	-0.026798	-0.199342	-0.0975	0.533673	-0.27733	-0.49688	-0.515972	-0.132328	-0.444653	1.29695	-0.186033		0.461446	-0.486293	-0.015039	-0.088745	0.752407	0.0076115	-0.368987	-0.358155	-0.41709	-0.232805	-0.20941	0.255123		0.310068	-0.49394	1.12103	-0.3472	0.080073	0.433565	0.022953	-0.30286	0.686819	0.111865	0.468943	-0.12685		0.431126	-0.73264	0.289627	0.395665	0.271207	0.081763	-0.34298	0.058851	0.616123	-0.06379
5.40205	-0.276054	0.0409929	0.307195	-0.135174	0.691588	0.073878	-0.555998	-0.52682	-0.052362	-0.405694	1.01835	0.292237		0.42286	-0.014767	-0.128846	-0.141288	1.03895	-0.057022	-0.295897	0.19898	-0.280463	0.0053771	-0.754917	0.207886		0.267715	-0.62221	0.837019	-0.4073	0.095843	0.210135	0.006091	-0.23606	0.713865	0.054807	0.203994	-0.18552		0.460391	-0.55051	0.132815	0.351171	0.136225	-0.12179	-0.37427	0.127242	0.357213	-0.13068
5.45329	-0.220014	0.283824	0.680786	-0.261505	0.586766	-0.037584	-0.462305	-0.66753	-0.489297	-0.152309	0.679834	0.170418		0.375432	-0.487851	0.16577	-0.386904	0.849077	-0.397496	-0.292973	-0.092792	-0.38534	-0.402847	-0.692157	0.24362		0.425594	-0.67408	1.27486	-0.33335	0.126021	0.448113	0.143076	-0.29957	0.726589	0.040722	0.310756	-0.02098		0.407654	-0.6957	0.116627	0.444118	0.176846	-0.13845	-0.34962	0.372804	0.493416	-0.12776
5.50453	-0.374919	0.21665	0.736766	-0.591329	0.611389	-0.508905	-0.352341	-0.56816	-0.4546	-0.339452	0.790225	0.117154		0.563639	-0.45733	-0.061077	-0.224779	0.340931	0.0216521	-0.290124	-0.423918	-0.479536	-0.254917	-0.744012	-0.157086		0.322376	-0.76907	1.26477	-0.35737	0.266711	0.626272	0.196499	-0.25802	0.182105	-0.05281	0.343188	-0.30273		0.408779	-0.54638	-0.04399	0.310714	0.020272	0.127002	-0.32438	0.327266	0.563501	-0.30178
5.55577	-0.269002	-1.31e-05	0.972946	-0.207809	0.65701	-0.172797	-0.190611	-0.469903	-0.204934	-0.454072	0.754259	-0.006254		0.76368	-0.788662	0.0256949	-0.15442	0.766959	-0.489111	-0.316743	-0.400732	-0.614284	-0.046754	-0.623608	-0.096114		0.173943	-0.57051	1.2337	-0.24635	0.14545	0.443046	0.131145	-0.42866	0.253785	-0.18489	0.310823	-0.35468		0.392173	-0.46969	0.180213	0.472432	0.063089	-0.03513	-0.30739	0.358096	0.245955	-0.39096
5.60702	-0.496107	-0.106452	1.29975	-0.426251	0.590525	-0.329055	-0.103373	-0.335137	0.232768	-0.273243	0.640188	0.20958		0.659565	-0.446527	-0.050173	-0.269153	0.693444	-0.277294	-0.395017	-0.119352	-0.502035	-0.016989	-0.848557	0.0374818		0.256466	-0.5196	0.838391	-0.22667	0.232537	0.362966	0.076691	-0.3043	0.187179	-0.39585	0.519762	-0.56995		0.322972	-0.37908	0.182196	0.255211	-0.007	-0.12509	-0.37649	0.314754	0.398564	-0.3217
5.65826	-0.455617	-0.126792	1.05257	-0.500889	0.819947	-0.100824	-0.146388	-0.719491	0.0558278	-0.296772	0.499511	-0.200099		0.662981	-0.59703	-0.243492	-0.032954	0.752784	-0.390815	-0.526055	-0.665507	-0.618491	0.162753	-0.580199	0.0280579		0.279056	-0.69707	0.626883	-0.31086	0.126835	0.349877	0.019326	-0.2845	0.104483	-0.27575	0.316529	-0.30366		0.287962	-0.38395	0.247186	0.252872	-0.04603	0.000475	-0.33922	0.2969	0.329951	-0.24012
5.7095	-0.511552	-0.079123	1.33709	-0.494423	0.527907	-0.280021	-0.045489	-0.499449	-0.097025	-0.242769	0.340969	-0.046769		0.493622	-0.72905	0.126799	-0.220943	0.644066	-0.430255	-0.405052	-0.272463	-0.816289	0.0230516	-0.301083	0.0899023		0.244325	-0.81781	0.763717	-0.41408	0.256385	0.186626	0.117807	-0.19771	0.51894	-0.12643	0.362247	-0.45817		0.256137	-0.37962	0.027116	0.279164	-0.14989	0.021215	-0.26797	0.29395	-0.04414	-0.44013
5.76074	-0.450438	0.112254	0.882268	-0.512237	0.527099	-0.109	-0.224633	-0.087739	0.150072	-0.122271	0.277367	-0.076519		0.542443	-0.419522	0.0467661	-0.297738	1.21701	-0.115857	-0.361455	-0.53073	-0.486746	-0.13305	-0.155734	0.133264		0.215827	-0.7725	0.999845	-0.31422	0.117487	0.607584	-0.00791	-0.17334	0.569397	-0.19038	0.378215	-0.28647		0.262486	-0.47276	0.101319	0.395224	-0.03888	-0.11917	-0.232	0.181935	0.263212	-0.2636
5.81198	-0.477004	0.021956	0.255755	-0.426385	0.832508	-0.33327	-0.271387	-0.010284	0.0260709	-0.226178	0.207578	-0.485149		0.390995	-0.679998	-0.194451	-0.502293	0.83292	-0.199767	-0.264946	-0.178655	-0.083081	0.04248	-0.236765	0.0510867		0.265426	-0.55921	0.820177	-0.23657	0.214919	0.325198	-0.02967	-0.12002	0.246497	-0.11372	0.259897	-0.35272		0.178717	-0.27566	0.36352	0.148169	-0.09272	-0.02147	-0.18586	0.294846	0.23318	-0.2121
5.86322	-0.720834	-0.143908	0.70604	-0.502588	0.986056	-0.474536	-0.415793	-0.153277	-0.186491	-0.266789	0.286705	-0.463932		0.583111	-1.07736	-0.187788	-0.335427	1.10423	-0.057444	-0.384308	-0.322116	-0.204602	0.114456	-0.265148	-0.128846		0.262174	-0.59524	1.00255	-0.47413	0.106454	0.544397	-0.05464	-0.06723	0.348301	0.019642	0.294413	-0.46876		0.246586	-0.33376	-0.02521	0.29815	-0.07999	-0.09511	-0.19393	0.130213	0.180971	-0.24254
5.91447	-0.548182	-0.016535	0.366336	0.0444039	0.910528	-0.380946	-0.320224	-0.0847	-0.327098	-0.463634	0.239521	-0.433442		0.442246	-0.893861	0.0711521	-0.284775	0.841091	-0.139939	-0.499593	-0.366742	-0.38178	0.413888	-0.193592	-0.264914		0.265992	-0.50448	0.849435	-0.34525	0.066941	0.467246	-0.04407	0.124864	0.209431	-0.03916	0.327512	-0.25068		0.248233	-0.40112	-0.08758	0.306999	-0.2381	-0.13296	-0.3457	0.252665	0.137695	-0.17305
5.96571	-0.447052	0.143506	-0.007641	-0.093607	0.818103	-0.522759	-0.461439	0.0522561	-0.239997	-0.594255	0.416734	0.300408		0.364472	-0.516778	-0.26514	0.0695312	0.906606	-0.119429	-0.354302	-0.78914	-0.436539	0.309809	-0.666627	0.11923		0.209263	-0.50976	0.889936	-0.16586	0.100776	0.571823	-0.06533	0.161219	0.443444	0.070562	0.188251	-0.46537		0.123082	-0.3562	0.023572	0.332727	-0.09167	0.05875	-0.32396	0.123363	0.146394	-0.29678
6.01695	-0.339633	-0.049519	-0.283781	0.213277	0.532902	-0.972716	-0.21499	-0.009552	-0.06192	-0.520966	0.48624	-0.044415		0.324802	-0.961629	-0.192119	-0.560565	0.568808	-0.135497	-0.352525	-0.618942	-0.668266	0.427111	-0.354188	-0.023513		0.170183	-0.34741	0.390982	-0.39275	0.114163	0.066226	-0.00976	0.117227	0.400774	0.13449	0.064903	-0.19739		0.223219	-0.21848	0.170426	0.152652	-0.1647	-0.0753	-0.26006	-0.01207	0.301851	-0.26641
6.06819	-0.289511	-0.167451	-0.138192	0.149102	0.82613	-0.780694	-0.316837	0.182144	0.186226	-0.540448	0.492749	0.448155		0.341898	-0.89902	0.0861818	-0.285337	0.719418	-0.138111	-0.335247	-0.785064	-0.537363	0.48981	-0.327527	-0.013927		0.202767	-0.32008	0.614118	-0.48466	0.077879	0.100967	-0.06415	0.210465	0.177395	0.201272	0.183483	-0.35688		0.10188	-0.27027	0.349017	0.149572	-0.09231	0.162173	-0.39906	-0.10838	-0.12403	-0.17641
6.11943	-0.247051	-0.299123	0.0750593	0.029177	0.96585	-0.350525	-0.285652	-0.292713	-0.136089	-0.374714	0.650156	0.109134		0.42414	-0.704543	-0.20094	0.128981	0.720245	-0.180397	-0.2926	-0.908263	-0.457153	0.949105	-0.713765	-0.178712		0.201483	-0.30449	0.163809	-0.53284	0.001506	0.513322	0.062695	0.447867	0.091801	0.402478	0.381472	-0.51998		-0.04262	-0.20002	0.054722	0.024605	-0.16963	0.178076	-0.3324	-0.13601	0.136014	-0.10345
6.17067	-0.159104	-0.339126	-0.027717	-0.204644	0.958027	-0.530377	-0.158529	-0.110536	-0.205413	-0.538366	0.115188	-0.128858		0.33	-0.523601	-0.455265	-0.02995	0.777338	-0.21297	-0.363951	-0.396441	-0.558812	0.753237	-0.526843	0.0665264		0.300217	-0.20273	0.397088	-0.47163	-0.00978	0.36888	-0.05632	0.425658	0.226108	0.27134	0.458463	-0.05016		0.101528	-0.31394	0.267044	0.128149	-0.05393	0.356423	-0.37391	-0.20224	-0.21998	-0.19192
6.22192	-0.011987	-0.195787	-0.278796	0.0903017	1.08915	-0.392227	-0.38403	-0.216238	0.0161781	-0.379214	-0.021636	0.16678		0.231671	-0.829	-0.132785	-0.20707	0.999113	-0.03469	-0.495781	-0.387316	-0.639172	0.846803	-0.850829	-0.10187		0.424871	-0.18578	0.525689	-0.53647	0.0661	0.829579	-0.07832	0.392352	0.439506	0.337344	0.456651	0.183516		0.059058	-0.25288	0.243405	0.033946	0.106326	0.397694	-0.46897	-0.2587	0.047096	-0.18062
6.27316	0.114122	-0.013824	-0.002261	0.112161	1.55826	-0.227706	-0.262443	-0.241682	0.278773	-0.498725	0.207467	0.0930151		0.229126	-1.01074	-0.218945	0.208411	0.913567	-0.100445	-0.447642	-0.182256	-0.336244	1.06905	-0.390677	0.0341106		0.587678	-0.06816	0.441884	-0.55607	-0.0223	0.237827	0.070259	0.346187	0.31023	0.297248	0.549273	0.169077		0.143628	-0.26575	0.141392	0.112489	0.110247	0.38914	-0.35968	-0.10658	-0.04377	-0.27743
6.3244	0.0676521	0.0619344	0.465841	0.0828776	1.31022	-0.371405	-0.176507	-0.278401	0.042517	-0.615758	0.256358	-0.262722		0.166757	-0.514948	-0.209325	0.269211	0.96623	-0.219611	-0.413009	0.062929	-0.629955	0.678576	-0.792637	0.0963731		0.400655	-0.29101	0.536056	-0.45138	0.021946	0.318447	0.101432	0.519056	0.1111	0.371005	0.339331	-0.08689		0.070766	-0.29835	0.446542	0.033561	0.111526	0.017663	-0.30864	-0.01065	0.112049	-0.24198
6.37564	-0.063479	0.322387	-0.404123	0.0701278	1.40921	-0.199309	-0.357162	-0.20685	-0.021648	-0.638418	0.0064626	-0.223565		0.206195	-0.569085	-0.223101	0.178534	0.86576	-0.582057	0.0437341	-0.307468	-0.264592	0.84228	-0.597319	-0.123522		0.571415	-0.05778	0.594366	-0.62515	0.165627	0.214593	0.08343	0.450343	0.485028	0.100096	0.211158	0.134963		0.077116	-0.33357	0.288573	0.077602	0.133201	0.113022	-0.23727	-0.19913	0.124582	-0.12576
6.42688	0.0076105	0.481031	-0.328656	0.0183961	1.00553	-0.509821	-0.269144	0.0914712	-0.013843	-0.665812	-0.075388	0.316143		0.217973	-0.828944	-0.143083	0.0818677	0.223025	-0.312375	0.0633902	-0.136696	-0.474782	0.35905	-0.165721	0.105371		0.622247	-0.14894	0.589812	-0.53605	0.316501	0.228199	0.04028	0.260797	0.265379	-0.03076	0.341914	-0.34773		0.040063	-0.47104	0.392216	0.223682	0.184293	0.126709	-0.29757	0.106681	-0.00919	-0.24725
6.47812	-0.115579	0.506642	0.0623296	-0.072425	0.744947	-0.678728	-0.148603	0.0789981	-0.07536	-0.69266	-0.276376	0.123851		0.193857	-0.851308	0.0044039	0.0513609	0.713553	-0.160778	0.046674	-0.114926	-0.361837	0.720708	-0.687008	0.0615558		0.542613	-0.25708	0.389407	-0.43751	0.076783	0.404851	0.189922	0.154947	0.20343	-0.04226	0.38406	0.105171		-0.01524	-0.18264	0.430632	0.267061	0.216474	0.062066	-0.32949	-0.18867	0.135662	-0.29252
6.52937	-0.099837	0.40228	-0.051258	-0.101244	0.591561	-0.381589	-0.11787	-0.057756	-0.155212	-0.800608	-0.129656	-0.163586		0.212317	-1.15408	-0.055792	0.129997	0.463747	-0.00384	0.183975	0.05374	-0.201543	0.577624	-0.566699	0.312507		0.3652	-0.16085	0.619294	-0.51874	0.132471	0.475723	0.121316	0.061072	0.250352	0.037836	0.550347	-0.13549		-0.04016	-0.24	0.073057	0.21963	0.026325	-0.04448	-0.40463	-0.1977	0.339012	-0.3103
6.58061	-0.270784	0.326077	-0.039663	-0.286313	0.669775	-0.282394	-0.134638	0.0371672	-0.262623	-1.00076	-0.36282	-0.199738		0.312018	-0.776274	-0.089581	-0.134096	0.872363	-0.404405	0.310659	0.267121	-0.290133	0.354299	-0.78431	0.558968		0.296507	-0.14122	0.321803	-0.49649	0.232827	0.326331	0.064566	-0.01559	0.166959	0.360459	0.476879	-0.29922		-0.00113	-0.27117	0.400981	0.400617	-0.06513	-0.18009	-0.32304	-0.38593	0.428536	-0.48042
6.63185	-0.13896	0.223257	-0.382921	-0.271032	0.682302	-0.630791	-0.357304	-0.080974	0.0109825	-0.875488	-0.385231	-0.232567		0.24243	-1.00821	0.16556	-0.195131	0.965943	0.0638567	0.492642	-0.452835	-0.482648	0.127468	-0.559215	0.620262		0.20645	-0.39069	0.408288	-0.5058	0.144152	0.166476	0.076099	0.095626	0.212367	0.215384	0.323915	-0.07726		0.014697	-0.15919	0.317522	0.521555	-0.0743	0.030448	-0.28525	-0.04019	0.121083	-0.12304
6.68309	-0.215972	0.501169	-0.793907	-0.246051	0.759886	-0.348725	-0.203375	-0.044304	-0.288251	-0.637507	-0.142232	-0.420201		0.240537	-0.920522	-0.352743	0.160705	0.84676	0.176454	0.609102	-0.228435	-0.496306	0.0680343	-0.92334	0.0059602		0.167024	-0.18107	0.548014	-0.47056	0.262291	0.191305	0.125183	-0.01055	0.221984	0.169531	0.67597	-0.37308		0.121634	-0.14237	0.423333	0.484702	0.039596	-0.04959	-0.36281	-0.21529	0.218056	-0.25952
6.73433	-0.395853	0.452921	-0.256225	-0.617583	0.839618	-0.295212	-0.242311	-0.19761	-0.171856	-0.685944	-0.463816	-0.460109		0.217679	-0.767868	-0.026151	-0.093515	1.03304	0.437545	0.701814	0.0472787	-0.285309	-0.050129	-0.752618	0.0529485		0.120763	-0.34818	0.726108	-0.43187	0.14097	0.087468	0.225691	-0.06912	0.097754	-0.00248	0.627304	-0.25059		0.048346	-0.13428	0.200112	0.570054	-0.06794	-0.08086	-0.38538	-0.35272	0.204539	-0.17281
6.78557	-0.273596	0.54249	-0.240096	-0.490343	0.652279	-0.195364	-0.298068	0.113303	-0.230283	-0.642218	-0.13337	0.157227		0.244287	-0.794867	-0.279906	0.412513	0.995171	0.177817	0.601165	0.229409	-0.554587	-0.26892	-0.731323	0.443269		0.216187	-0.08638	0.52949	-0.48126	-0.01194	0.068233	0.360054	0.135738	0.027561	0.278717	0.497144	-0.44194		0.122591	-0.13945	0.444133	0.629279	-0.08361	-0.11063	-0.2624	-0.3068	-0.0207	-0.28453
6.83681	-0.439385	0.224463	-0.466067	-0.109754	0.649984	-0.598369	-0.284541	-0.079848	0.0560499	-0.8574	-0.329878	-0.235852		0.35386	-1.33628	-0.249844	-0.029278	0.923655	-0.024602	0.400161	0.508816	-0.46614	-0.350797	-1.01084	0.734149		0.109658	-0.00171	0.522904	-0.4885	0.061153	-0.07728	0.405606	0.156825	-0.13087	0.143036	0.501972	-0.3887		0.252115	-0.04842	0.324366	0.635005	-0.15414	-0.07052	-0.25173	-0.39618	0.023631	-0.19092
6.88806	-0.583683	0.534101	-0.492564	-0.442648	0.788051	-0.664197	-0.321977	-0.140374	0.0107582	-0.808815	-0.228145	-0.098367		0.336382	-0.960812	0.144029	-0.102362	0.533382	-0.490295	0.353289	0.0742604	-0.849277	-0.487492	-1.02922	0.793103		0.066858	0.123492	0.528672	-0.65792	-0.02429	-0.0154	0.414716	0.12841	0.09326	0.38343	0.41517	-0.37547		0.303252	-0.05468	0.556955	0.74773	-0.10371	-0.09678	-0.4059	-0.27867	0.129919	-0.1306
6.9393	-0.448218	0.573627	-0.345568	0.147983	0.665968	-0.793209	-0.21897	0.0211647	-0.054521	-0.825898	-0.249411	-0.754251		0.313683	-1.11617	-0.140064	0.366812	0.579728	0.089802	0.56511	0.139865	-0.734737	-0.410564	-0.751644	0.585755		0.024122	0.15986	0.298851	-0.55943	0.002987	0.620719	0.501753	0.355585	-0.04072	0.702047	0.456474	-0.1663		0.165469	-0.23016	0.413961	0.708196	-0.29221	-0.00189	-0.50344	-0.30104	0.076435	-0.24789
6.99054	-0.429903	0.621158	-0.250039	-0.205861	0.90626	-0.073102	-0.256667	0.058303	0.186539	-0.888357	-0.095486	-0.381656		0.163057	-1.08713	-0.053566	0.196043	0.890026	-0.402059	0.497273	-0.048864	-0.665923	-0.274575	-0.87171	0.351457		0.007887	0.091526	0.450638	-0.5252	-0.3001	0.561644	0.620614	0.234289	-0.21778	0.660081	0.512926	-0.21017		0.238508	-0.2164	0.31352	0.570942	-0.09313	-0.13158	-0.37201	-0.18442	0.211577	-0.13393
7.04178	-0.572045	0.416069	-0.940837	-0.237524	1.18741	0.180534	-0.189053	-0.057254	0.297994	-0.978675	-0.446969	-0.196868		0.154841	-0.783265	-0.263637	0.369092	0.442864	-0.204666	0.332365	-0.062995	-0.402748	-0.506039	-0.97408	-0.131661		0.017383	0.069188	0.060197	-0.45541	-0.25371	-0.19363	0.546747	0.213265	-0.11323	0.590495	0.656348	-0.11881		0.347166	-0.15089	0.526521	0.59761	-0.12185	0.040694	-0.47074	-0.36747	0.076303	-0.12815
7.09302	-0.512306	0.513079	-0.094923	-0.147638	1.02851	0.154269	0.012536	0.036479	0.490519	-0.957339	-0.57211	-0.153463		0.217067	-0.660139	-0.401282	0.0963955	0.647467	-0.105239	0.535906	-0.343072	-0.827578	-0.479061	-0.614616	0.0082021		0.239387	-0.08399	0.284849	-0.42995	-0.11361	0.225109	0.556092	0.368592	-0.08732	0.619672	0.483599	-0.16104		0.289363	-0.22466	0.402658	0.609892	-0.06609	0.145624	-0.40935	-0.32366	0.301927	-0.20658
7.14426	-0.550948	0.605012	-0.075433	0.0773338	0.699689	0.379796	-0.119216	-0.064154	0.479069	-0.945876	-0.313664	-0.251791		0.315683	-0.558029	-0.329402	0.265401	0.764788	-0.5581	0.241143	-0.125497	-0.680818	-0.284691	-0.246362	0.0805512		0.323677	-0.01731	0.092124	-0.57124	-0.11451	0.244604	0.531929	0.533583	0.108832	0.701277	0.537457	-0.1669		0.347859	-0.22974	0.440277	0.705691	0.007265	0.087081	-0.33878	-0.42267	-0.00137	-0.11849
7.19551	-0.632104	0.589055	-0.346574	-0.051053	0.694207	0.423724	-0.164718	-0.502328	0.318753	-0.900417	-0.057904	-0.025163		0.425321	-0.8095	-0.367725	0.1754	0.550588	-0.246104	0.18377	-0.171763	-0.631539	-0.239225	-0.578761	-0.249557		0.252648	-0.04515	0.333179	-0.6169	0.022733	0.092599	0.483561	0.556124	0.219487	0.52032	0.555753	-0.08825		0.24987	-0.21251	0.255656	0.685585	-0.08139	0.294322	-0.36901	-0.29092	0.428962	-0.12429
7.24675	-0.713121	0.615324	-0.631478	-0.197998	0.785605	0.383355	-0.108882	-0.353797	0.182272	-0.781093	-0.001992	-0.263011		0.253422	-0.895261	-0.2249	0.293015	0.814706	-0.381484	0.140867	-0.494622	-0.457887	-0.020736	-0.477899	-0.264125		0.026014	-0.07021	0.27106	-0.50736	0.075022	0.101817	0.403268	0.655367	-0.29876	0.336696	0.428514	0.245853		0.310261	-0.14729	0.255674	0.714003	-0.07221	0.101711	-0.29508	-0.2653	0.374238	-0.26613
7.29799	-0.593212	0.636041	-0.270047	-0.438486	0.718056	0.246866	-0.144879	-0.243088	0.102527	-0.845077	0.135103	-0.128008		0.404376	-0.957152	-0.412394	0.167959	0.93639	-0.511846	0.306489	0.0728928	-0.619541	-0.270924	-0.725858	-0.034096		-0.06127	-0.09138	0.542612	-0.65956	-0.22603	-0.15629	0.185003	0.587111	-0.26691	0.249991	0.385866	0.330101		0.137442	-0.12032	0.283117	0.658891	0.057002	-0.00587	-0.34579	-0.25017	0.208911	-0.21288
7.34923	-0.698442	0.645965	0.0404351	-0.259497	0.586059	-0.371435	-0.273909	-0.426165	0.009862	-0.947934	0.0529879	-0.276463		0.323222	-0.679352	-0.386078	0.291902	0.891018	-0.467643	0.200881	-0.432329	-0.605375	0.209149	-0.518864	0.078197		0.0145	-0.28556	0.488916	-0.70294	-0.13174	0.113989	0.198735	0.517928	0.014267	0.054158	0.385027	-0.08016		0.137946	-0.2346	0.410279	0.481525	-0.10903	0.04483	-0.36597	-0.13245	0.00569	-0.22711
7.40047	-0.812206	0.390003	-0.362933	-0.222717	0.353424	0.276821	-0.288583	-0.237069	0.50182	-0.966963	-0.193023	-0.01017		0.524262	-0.633708	-0.141338	0.500209	0.806509	-0.031182	0.28785	0.015391	-0.720532	0.0205398	-0.829881	0.0389685		-0.0326	-0.21251	0.620928	-0.58263	0.032807	0.067596	0.094557	0.479874	0.174375	0.006821	0.298699	-0.35562		0.085878	-0.43979	0.292722	0.525849	0.054833	0.05553	-0.43346	-0.05202	0.06191	0.009933
7.45172	-0.755417	0.318458	-0.268801	-0.421757	0.524276	-0.034185	-0.246039	-0.282632	0.79831	-0.78713	0.0376216	-0.716423		0.667879	-0.916582	-0.122523	0.365512	1.00781	-0.166389	0.35782	-0.109228	-0.273955	0.136745	-0.891636	-0.05324		-0.14499	-0.40301	0.498012	-0.69733	-0.04468	0.216516	-0.04223	0.45508	0.126082	0.137774	0.278502	-0.49696		-0.04919	-0.41469	0.38769	0.639382	-0.05272	0.103054	-0.33907	-0.14016	0.15325	0.10457
7.50296	-0.72763	0.192676	-0.299685	-0.514826	0.747876	-0.318537	-0.205986	-0.412008	0.826598	-0.730268	0.0533388	-0.279142		0.774527	-0.323973	-0.408601	0.197348	0.628305	-0.346813	0.487142	-0.190243	-0.659238	0.517141	-0.719199	0.297328		-0.12536	-0.56291	0.393183	-0.50658	-0.08162	0.088648	-0.08347	0.431914	-0.29364	0.158811	0.195386	-0.32396		0.082765	-0.55228	0.410405	0.514288	-0.1179	-0.08025	-0.28254	-0.34963	0.173856	0.141202
7.5542	-0.79534	0.0882229	-0.279378	-0.364778	1.0764	-0.46566	-0.344379	-0.266739	0.780808	-0.585285	0.0139575	-0.055542		0.921247	-0.746854	0.0161826	0.173216	1.01119	-0.246581	0.499632	-0.733405	-0.474405	0.30227	-0.767061	0.61885		-0.06823	-0.60987	0.323804	-0.57036	-0.11189	0.187375	-0.16406	0.178983	-0.09454	0.050196	0.280998	-0.13576		-0.01295	-0.55447	0.145509	0.358091	-0.2207	-0.09607	-0.36847	-0.29662	0.306101	0.050902
7.60544	-0.90534	0.147361	-0.805772	-0.427452	0.758671	-0.299922	-0.268606	-0.491926	0.445844	-0.663583	-0.099251	0.127016		0.717479	-0.541617	-0.315852	0.152731	1.0785	-0.657871	0.680374	-0.752755	-0.792641	0.241266	-0.504497	0.544964		-0.14248	-0.93058	0.710415	-0.56853	0.066527	-0.11547	-0.14032	0.21876	0.145553	-0.02963	0.347572	-0.18235		0.04028	-0.39923	0.063023	0.300781	-0.21644	0.105702	-0.34421	-0.34746	0.264987	-0.06582
7.65668	-0.686389	-0.117479	-0.708701	-0.536145	1.02576	-0.174776	-0.49061	-0.539172	0.536638	-0.650791	-0.169997	0.0228477		0.739327	-0.416772	0.101481	0.158776	0.958678	-0.333832	0.459463	-0.634844	-0.814334	0.428941	-0.576488	0.590103		-0.1992	-0.72732	0.584092	-0.54345	0.187702	0.047439	-0.09127	0.173504	-0.02829	-0.04149	0.49299	0.025939		-0.00912	-0.70086	-0.08839	0.505676	-0.10918	0.128193	-0.19343	-0.16866	0.087977	0.046341
7.70792	-0.786234	0.363444	-0.316483	-0.420408	1.0839	-0.597586	-0.297633	-0.257004	0.433588	-0.881981	-0.10501	0.0559252		0.787716	-0.26256	0.155976	0.0258113	0.736188	-0.315188	0.535599	-0.505982	-0.819761	0.671914	-0.804857	0.512383		-0.13273	-0.67267	0.647225	-0.36006	-0.07342	0.018372	-0.18384	0.006652	0.28669	0.049545	0.303123	0.081975		0.013258	-0.64806	0.295197	0.305964	0.034554	-0.13084	-0.2263	-0.2153	0.283186	-0.07949
7.75916	-0.737429	0.0989093	-0.463835	-0.38053	1.16159	-0.473388	-0.287746	-0.040501	0.762824	-0.735762	-0.109568	0.13785		0.882242	-0.662453	-0.05104	-0.066219	0.811803	-0.022029	0.39982	0.240015	-0.88831	0.322687	-0.853897	-0.036331		-0.16015	-0.71527	0.586304	-0.44356	-0.05896	0.174942	-0.09357	0.149264	0.125373	0.064019	0.320692	0.562666		0.147322	-0.51517	0.238983	0.546812	0.048258	-0.142	-0.27431	-0.22304	0.555797	-0.0215
7.81041	-0.694587	0.603562	-0.398295	-0.324803	1.28745	-0.076718	-0.308967	-0.376137	0.560233	-0.894514	0.0883699	0.200811		0.731556	-0.318257	0.0900287	-0.134864	0.524469	0.10655	0.361744	0.145147	-0.895631	0.419732	-0.848201	0.115617		-0.27104	-0.83915	0.687997	-0.57974	-0.07955	0.166701	-0.30574	-0.00332	0.046671	-0.07136	0.16472	0.030531		0.193447	-0.44496	0.374106	0.228574	0.167918	0.127985	-0.30358	-0.26242	0.358535	-0.20217
7.86165	-0.783137	0.492831	-0.273721	-0.186835	1.24467	0.053128	-0.309459	-0.313213	0.450437	-0.829463	0.103681	0.218196		0.723973	-0.458451	0.127313	-0.196082	0.43158	0.118008	0.415298	0.588641	-0.637039	0.510246	-0.410369	-0.044128		-0.22534	-0.7972	0.763136	-0.41209	-0.16966	-0.18733	-0.22364	-0.20425	0.111295	-0.11339	0.18705	-0.05198		0.22234	-0.50132	0.504727	0.312631	0.143557	-0.04114	-0.16409	-0.21501	0.256068	-0.0979
7.91289	-0.514428	0.364872	-0.615467	-0.070845	0.967168	-0.605553	-0.414612	-0.410034	0.767045	-0.799467	0.490608	0.018362		0.73659	-0.602538	0.0844889	0.145407	0.612259	0.159707	0.566758	0.532411	-0.22977	0.307676	-0.064536	-0.338877		-0.29709	-0.7907	0.772072	-0.55504	0.01738	0.025728	-0.23911	-0.07267	0.001194	-0.22387	0.147572	-0.07698		0.166465	-0.59981	0.513926	0.167958	-0.01888	-0.18882	-0.26781	-0.26288	0.273774	-0.03025
7.96413	-0.674999	0.646403	-0.477067	-0.314919	0.899757	-0.04366	-0.371768	-0.477601	0.380726	-0.654902	0.125922	-0.209253		0.520917	-0.574465	-0.216275	-0.125232	0.812152	-0.171868	0.796068	0.356262	-0.449939	0.263709	-0.029172	0.119862		-0.25726	-0.5736	0.568258	-0.55482	-0.16053	-0.42671	-0.12958	-0.13366	-0.2938	-0.07983	0.132608	-0.18861		0.204228	-0.66966	0.613519	0.180298	0.077	-0.07359	-0.31188	-0.14695	0.290742	-0.33972
8.01537	-0.649263	0.776706	-0.644991	-0.277866	0.859081	-0.315146	-0.273991	-0.425962	0.650695	-0.469766	0.089371	-0.439186		0.543112	-0.63743	-0.058231	0.245948	0.724151	-0.255101	1.08148	0.480054	-0.511882	0.0682279	-0.116423	0.432653		-0.18222	-0.58091	0.711089	-0.59758	-0.17141	-0.38291	-0.23664	0.085041	-0.14725	-0.07844	0.053272	-0.11595		0.178263	-0.67242	0.493423	0.023913	-0.2255	-0.10509	-0.30764	-0.23168	0.455921	-0.14572
8.06661	-0.576905	1.15297	-0.053953	-0.125429	0.691185	-0.293965	0.0694302	-0.987485	0.22977	-0.520586	-0.226942	0.0696646		0.531175	-0.480187	-0.081083	-0.221534	1.12732	-0.336254	0.803153	1.20351	-0.232289	0.0651182	-0.405049	0.100066		-0.29495	-0.47507	0.614275	-0.40582	-0.33501	-0.23433	-0.18121	-0.06908	-0.11016	-0.04209	0.351427	-0.3792		0.194146	-0.65236	0.382982	-0.02519	-0.12912	-0.27282	-0.29412	-0.28156	0.112098	-0.2125
8.11786	-0.799244	1.04439	-0.730709	-0.101419	0.532315	0.279045	0.319355	-0.345181	0.616679	-0.217667	-0.209158	-0.322881		0.668795	-0.66402	-0.093494	-0.322737	0.497716	-0.37917	0.710079	1.07572	-0.37227	0.325123	-0.480829	0.365069		-0.39751	-0.52337	0.594991	-0.46574	-0.08422	-0.42391	-0.22428	-0.08472	0.15989	0.055108	0.414803	-0.06916		0.330858	-0.70579	0.455466	-0.00691	-0.29946	-0.1601	-0.24715	-0.30148	0.157334	-0.3012
8.1691	-0.638662	0.660461	-0.215148	-0.023408	0.849735	-0.126352	0.287214	-0.367023	0.625318	-0.777328	-0.210134	-0.473124		0.487557	-0.482311	-0.013863	-0.259817	1.13156	-0.355534	0.551601	1.04234	-0.068833	-0.006121	-0.211779	0.377383		-0.40951	-0.31395	0.456352	-0.45344	-0.03825	-0.20993	-0.30583	-0.16159	-0.23869	-0.21624	0.137146	-0.17489		0.2824	-0.64409	0.442368	0.067977	-0.27216	-0.18683	-0.24106	-0.00408	0.052012	0.03944
8.22034	-0.618022	0.714392	-0.626542	0.18408	1.01385	-0.47827	0.208816	-0.342957	0.445394	-1.00567	-0.289293	-0.580684		0.370465	-0.889217	-0.099502	-0.398572	0.673631	-0.227737	0.37923	0.618008	-0.257445	-0.446899	0.0083883	-0.145276		-0.47583	-0.7237	0.648401	-0.49332	0.162648	-0.14339	-0.20331	-0.2117	0.142256	0.027287	0.230917	-0.11869		0.372541	-0.61254	0.184874	0.03021	-0.23956	-0.04899	-0.30948	0.064478	0.157417	-0.08835
8.27158	-0.862882	0.537118	-0.051007	-0.008092	0.825104	-0.360676	0.0098483	-0.309508	0.403031	-0.79737	-0.611603	-0.341789		0.42077	-0.411092	-0.023703	-0.257727	0.669949	-0.151846	0.322478	0.566742	-0.627853	-0.071648	-0.104592	0.0420918		-0.36152	-0.37473	0.654937	-0.43739	0.025521	0.284681	-0.26527	-0.31443	0.003616	0.004094	0.302543	-0.19094		0.383816	-0.66412	0.244635	0.113308	-0.3381	-0.34696	-0.22142	-0.24133	-0.07029	-0.22504
8.32282	-0.741504	0.520995	-0.529368	-0.193434	0.549975	0.0286363	-0.060335	-0.257494	0.617455	-0.624385	-0.427994	0.0297836		0.489766	-0.853186	0.304745	-0.235983	0.865796	-0.231641	0.439245	0.651674	-0.501174	-0.153548	-0.785903	0.0038768		-0.46938	-0.37741	0.451708	-0.41441	-0.03179	0.036098	-0.22348	-0.35109	-0.27071	0.126918	0.620947	-0.01735		0.401699	-0.54295	0.321386	0.036807	-0.29353	-0.22285	-0.31901	-0.25615	0.090047	-0.29591
8.37406	-0.611055	0.415485	0.0948064	-0.15774	0.612051	-0.11927	-0.090772	-0.237802	0.200726	-0.674726	-0.226418	-0.562861		0.314623	-0.511397	0.233951	-0.482167	0.783455	-0.293797	0.39935	0.753359	-0.357526	0.120271	-0.79494	-0.197302		-0.36416	-0.27788	0.579084	-0.47661	0.020925	0.237847	-0.23418	-0.38188	0.061166	0.150565	0.418619	-0.23241		0.441728	-0.57129	0.066784	0.021031	-0.21169	-0.14741	-0.22256	-0.0193	-0.21002	-0.42599
8.4253	-0.603558	0.135027	0.49028	-0.300551	0.196993	-0.061185	-0.214711	-0.169829	0.281319	-0.515653	-0.189585	-0.121201		0.354324	-0.851474	0.0120142	-0.345705	0.4814	-0.338655	0.285964	0.717091	-0.418049	-0.061187	-0.836522	0.0853056		-0.25769	-0.36791	0.663173	-0.60569	-0.08416	0.274379	-0.23491	-0.11923	0.017921	-0.11578	0.356725	-0.23579		0.504711	-0.46073	0.034151	0.099361	-0.1627	-0.11529	-0.19147	-0.18176	-0.04121	-0.34423
8.47655	-0.551007	0.158428	0.43209	-0.135139	0.582989	-0.324526	-0.088877	-0.202804	0.310616	-0.478478	-0.249539	-0.038854		0.198061	-0.765708	0.182863	-0.816071	0.791852	-0.308503	0.0084211	0.519154	-0.65184	-0.033424	-1.13851	0.0647977		-0.31408	-0.32207	0.369563	-0.41892	-0.08069	0.187706	-0.20135	-0.12263	0.059081	0.047727	0.51126	-0.04181		0.508659	-0.56373	0.059509	-0.04765	-0.08856	-0.10748	-0.1865	-0.15244	0.085422	-0.29728
8.52779	-0.715753	-0.026459	0.559187	-0.062566	0.493596	-0.181327	-0.244315	-0.386019	0.187372	-0.573664	0.375258	-0.468451		0.131836	-0.794488	-0.178071	-0.585422	0.760491	0.031087	0.148399	0.441714	-0.228198	0.0157013	-0.743381	-0.198843		-0.39466	-0.51432	0.611812	-0.27545	-0.19821	0.233469	-0.15309	-0.07606	-0.07924	-0.19872	0.383656	0.014124		0.378524	-0.51166	0.10564	-0.08859	-0.01233	-0.23374	-0.25359	-0.10829	0.195547	-0.30699
8.57903	-0.684541	-0.078928	0.310123	-0.171776	0.404769	-0.323462	-0.18073	-0.271936	0.190886	-0.635717	0.0389873	-0.431561		0.238523	-0.724634	-0.10652	-0.270697	0.837667	-0.377482	0.414686	0.560412	-0.139127	-0.051233	-0.739095	0.231506		-0.24437	-0.60419	0.350404	-0.57747	-0.11643	0.397523	-0.22842	0.044742	-0.13604	-0.2038	0.513897	0.370804		0.305527	-0.56358	0.386495	-0.00411	-0.00653	0.039134	-0.26969	0.069439	0.520511	-0.58302
8.63027	-0.74183	-0.264836	0.26706	-0.250255	0.412392	-0.131124	-0.326823	-0.000142	-0.056166	-0.484413	-0.007339	-0.311212		0.201857	-1.0459	0.010817	-0.604995	0.725939	-0.475531	0.371989	0.87677	0.0774527	0.330343	-0.611006	-0.090562		-0.24028	-0.59714	0.694711	-0.44819	-0.22378	0.106523	-0.11984	0.046091	-0.21373	-0.17718	0.584951	0.230722		0.13525	-0.3679	0.144583	0.0591	-0.0567	-0.04723	-0.29458	-0.17063	0.359525	-0.46172
8.68151	-0.618951	-0.120092	-0.180132	-0.232099	0.665622	0.0139956	-0.304933	0.375784	-0.050211	-0.69491	-0.36329	-0.207895		0.40706	-1.05689	0.0874555	-0.613364	0.838389	-0.587833	0.294519	1.20298	0.0483685	0.282699	-0.363215	-0.197844		-0.26007	-0.27966	0.589861	-0.3814	0.037776	0.244921	-0.12312	0.011673	-0.18882	-0.149	0.645822	0.202124		0.17081	-0.4771	0.06723	0.096094	-0.15272	0.199921	-0.13981	-0.0969	0.543069	-0.46298
8.73275	-0.691849	-0.22908	-0.093358	-0.250868	0.536849	-0.384629	-0.24	0.303787	-0.072494	-0.465173	-0.121424	-0.538494		0.360891	-1.30678	0.273246	-0.61307	0.870896	-0.696087	0.216526	0.990844	0.144401	-0.003014	-0.71903	0.381879		-0.14921	-0.45242	0.778711	-0.35475	-0.11108	0.212696	-0.10804	-0.14417	-0.32864	-0.17063	0.508629	0.075174		0.171788	-0.49167	0.103753	0.055464	-0.1942	0.280608	-0.25901	-0.15798	0.50459	-0.41969
8.784	-0.755827	-0.266033	-0.008807	0.131541	0.621983	-0.164013	-0.348921	0.243798	0.396152	-0.823123	-0.506587	-0.097975		0.331281	-1.28552	-0.095705	-0.310213	0.81125	-0.029853	0.176726	0.866096	-0.034018	0.0522258	-0.329569	0.267412		-0.1173	-0.0955	0.770246	-0.30279	-0.04401	0.026579	-0.00694	0.034838	-0.30601	0.067303	0.45932	0.484742		0.152377	-0.33159	0.106446	-0.13389	-0.11697	-0.03102	-0.26498	-0.03319	0.397385	-0.33653
8.83524	-0.682791	0.0729531	-0.228312	0.0383275	0.688259	-0.321591	-0.314227	0.589697	0.129464	-0.871669	-0.245925	0.100547		0.298175	-0.942907	-0.124222	-0.724543	0.472331	-0.570086	0.467191	0.918521	0.100297	0.124572	-0.203831	-0.059016		-0.04786	-0.08846	0.714185	-0.32727	0.008358	-0.11888	0.009469	-0.02785	-0.02569	-0.1929	0.639645	0.593255		0.128839	-0.1617	-0.31413	0.053386	-0.21281	0.104571	-0.33371	-0.12108	0.477471	-0.29289
8.88648	-0.799515	0.0361753	-0.576236	0.0142487	0.959907	-0.424038	-0.170339	0.617797	0.164011	-0.900499	-0.441469	0.113195		0.0525881	-1.5889	0.152108	-0.430528	0.425934	-0.576423	0.497183	0.916957	0.0145684	0.0975399	-0.257747	-0.153728		-0.15512	-0.28286	0.642692	-0.17099	0.062447	-0.00123	-0.08559	-0.19644	-0.11706	-0.24333	0.542743	0.321788		0.11232	-0.19407	0.221509	0.073268	-0.33929	0.001588	-0.33822	-0.24633	0.029593	-0.48407
8.93772	-0.715341	0.0337969	-0.392765	-0.13513	0.635991	-0.317168	-0.133072	0.35139	0.179334	-0.614854	-0.267034	-0.231346		0.210442	-0.987721	0.037268	-0.526789	0.804857	0.0421556	0.438946	0.55675	0.139593	0.132015	-0.80164	-0.421331		-0.16669	-0.38315	0.898847	-0.14007	-0.02371	0.17901	-0.25138	-0.17711	-0.05939	-0.13265	0.659911	0.268949		0.060802	-0.20241	0.036294	0.049908	-0.1382	0.157677	-0.34583	-0.15765	-0.09774	-0.40703
8.98896	-0.701776	-0.028783	-0.522071	-0.411501	0.947939	-0.50249	-0.078325	-0.069063	0.623096	-0.476462	-0.258062	-0.250607		0.228312	-1.1176	0.357277	-0.604519	0.756707	0.409439	0.308739	0.477096	0.0353336	0.132934	-0.786455	0.137437		-0.18351	-0.19761	0.840222	-0.29205	0.040488	0.253092	-0.26626	-0.32312	-0.08085	-0.27767	0.585401	0.056638		0.182265	-0.33503	-0.00011	0.159381	-0.10489	-0.04567	-0.32052	-0.0376	0.254385	-0.43709
9.04021	-0.574448	-0.062076	-0.385437	-0.477573	0.796166	-0.322928	-0.053694	0.238212	0.431235	-0.552573	-0.124306	-0.291619		0.167964	-1.0065	0.202338	-0.520919	0.947542	0.174341	0.258057	0.248772	0.232571	0.269187	-0.587295	-0.181941		-0.21926	-0.30212	0.86761	-0.35143	-0.14076	0.20124	-0.26303	-0.26377	-0.10448	0.08092	0.637679	0.048869		0.292608	-0.01348	0.008911	-0.00556	-0.0201	-0.13368	-0.39079	0.021152	0.00717	-0.40294
9.09145	-0.5263	-0.250908	-0.1828	-0.056344	0.685564	-0.591646	-0.147879	-0.050109	0.325404	-0.399878	-0.010898	-0.077427		0.186717	-1.16287	0.38722	-0.543954	0.242918	0.0568074	0.193795	-0.221973	-0.10644	-0.048373	-0.209213	-0.106039		-0.13095	-0.30497	0.788355	-0.27343	-0.12897	0.599133	-0.25876	-0.18339	0.052981	-0.19982	0.395558	0.557741		0.131818	-0.2052	0.337371	-0.05688	-0.25844	-0.11725	-0.32153	-0.04478	0.104211	-0.43844
9.14269	-0.642195	-0.210031	-0.226777	-0.043743	0.871602	-0.490922	-0.271449	-0.281049	0.266308	-0.332066	-0.010296	-0.390968		0.381816	-1.08329	0.642684	-0.651756	1.01725	-0.15574	0.0524989	0.019607	-0.024306	0.281032	-0.704005	-0.028902		-0.17006	-0.11359	0.602235	-0.21697	-0.01716	0.283521	-0.19165	0.104249	0.102457	0.050927	0.530281	0.179209		0.259372	-0.28843	0.014346	0.015551	-0.08261	-0.37488	-0.35681	-0.13525	0.117041	-0.28819
9.19393	-0.547202	-0.324455	-0.364276	-0.097994	1.00579	-0.324498	-0.205969	-0.446263	0.211989	-0.430517	-0.051169	-0.151939		0.384578	-0.962137	0.771877	-0.373876	0.898443	-0.11118	0.0729681	-0.004815	-0.34782	0.261525	-0.541067	-0.221586		-0.14843	-0.38182	0.600964	-0.51742	0.111091	0.444475	-0.13571	0.061101	0.009085	-0.10755	0.652873	0.116502		0.097124	-0.38506	0.089125	0.229149	-0.26199	-0.03314	-0.34858	0.035497	-0.45425	-0.31496
9.24517	-0.816538	-0.404529	-0.507575	-0.029849	1.0141	-0.670337	-0.317492	-0.071978	0.0075227	-0.204807	-0.137446	-0.368017		0.309843	-1.00326	1.06477	-0.705654	0.824561	-0.145607	-0.056146	-0.04936	-0.562345	0.347867	-0.680989	-0.230838		-0.24779	0.067046	0.704214	-0.51773	-0.0674	0.130912	-0.22006	0.239145	0.164542	-0.25706	0.383428	0.274647		0.016701	-0.34734	0.249766	0.10195	-0.22466	-0.1787	-0.26818	-0.19821	-0.26276	-0.2098
9.29641	-0.676421	-0.070852	0.180601	-0.12973	0.821036	-0.68179	-0.454369	-0.123044	0.313237	-0.408576	-0.056223	0.0205809		0.271545	-1.11302	1.04541	-0.659559	0.718216	-0.288484	-0.401179	0.230221	-0.379418	0.278583	-0.768871	0.0174774		-0.27207	-0.08054	0.476991	-0.43334	0.012734	0.354217	-0.20371	0.269077	0.302407	-0.08368	0.491618	0.274343		0.130922	-0.43791	0.11874	0.178253	-0.24677	-0.0569	-0.40558	-0.29253	-0.27963	-0.25633
9.34765	-0.592121	-0.15979	0.0274724	-0.197852	0.701474	-0.536333	-0.294049	-0.247409	0.319693	-0.173788	0.202768	-0.153087		0.307474	-0.999883	0.54143	-0.899521	0.685804	-0.221004	-0.090015	0.130017	-0.260492	0.371169	-0.648463	-0.231543		-0.2926	-0.03605	0.536919	-0.64725	-0.05346	0.442336	-0.14526	0.325756	0.181257	-0.25555	0.457087	0.14791		0.200337	-0.50608	-0.01689	0.207444	-0.14812	-0.08947	-0.42757	-0.37059	-0.03138	-0.27376
9.3989	-0.707618	-0.209232	-0.283267	-0.113624	0.977115	-0.480727	-0.439899	-0.440524	0.485028	-0.325284	-0.050981	-0.363464		0.354642	-0.786962	0.39784	-0.92284	0.678431	-0.519107	-0.231464	0.503032	-0.642285	0.452758	-0.646431	-0.250619		-0.22627	-0.11584	0.397121	-0.41643	-0.22331	-0.10813	0.010386	0.315618	0.020975	-0.45243	0.484172	-0.00527		0.220867	-0.42477	0.205338	0.303402	-0.15517	0.202171	-0.35096	-0.21239	0.067579	-0.14689
9.45014	-0.604646	-0.105695	-0.374523	-0.353874	0.864234	-0.740822	-0.248868	-0.46632	0.354391	0.0623679	-0.126233	0.153079		0.291703	-0.939918	0.243425	-0.811209	0.177659	-0.616769	-0.205653	0.506616	-0.663644	0.0239748	-0.585053	0.287899		-0.35654	-0.1176	0.247574	-0.42554	-0.03499	0.150062	0.234422	0.469033	0.130031	-0.24036	0.542645	0.029146		0.219378	-0.58302	-0.11027	0.263866	-0.06663	-0.16082	-0.33615	-0.18873	0.140853	0.132325
9.50138	-0.747344	0.0363204	-0.867579	0.0548658	0.649205	-0.474084	-0.247509	-0.594523	0.22255	0.0970458	0.0201067	0.0012676		0.30821	-1.03893	0.202021	-1.02633	0.419646	-0.201311	-0.150889	0.223436	-0.549939	0.0971413	-0.693135	-0.169598		-0.30299	-0.24794	0.381933	-0.39128	-0.26997	0.110286	0.24493	0.288445	0.314273	-0.05215	0.609525	-0.07371		0.232514	-0.64787	-0.1294	0.423388	-0.08968	0.096855	-0.35779	-0.24214	-0.2434	-0.03863
9.55262	-0.670925	0.10799	-0.402917	-0.216048	0.846908	-0.414746	-0.312392	-0.710232	-0.157066	-0.214571	0.103872	0.146395		0.302684	-1.11273	0.182505	-0.907795	0.520618	-0.257454	-0.295327	0.0165998	-0.827779	0.173547	-0.555548	0.107709		-0.29971	-0.20989	0.392941	-0.35968	-0.19352	0.418633	0.218446	0.409507	0.113076	-0.1361	0.748467	-0.21942		0.253266	-0.697	-0.12581	0.401423	-0.16406	-0.19327	-0.36229	-0.12885	-0.19638	-0.12147
9.60386	-0.545504	-0.025045	-0.389284	0.0038412	1.44109	-0.204368	-0.259834	-0.67841	0.209778	-0.249224	0.0094878	0.0241121		0.577383	-1.04282	0.0756333	-0.585822	0.558946	-0.634612	-0.084046	0.11879	-0.334085	-0.029607	-0.477624	0.342051		-0.16955	-0.35557	0.371481	-0.48581	-0.39148	0.50105	0.17851	0.477711	0.036608	-0.16998	0.643019	0.076807		0.145272	-0.56571	0.37465	0.345316	-0.00182	-0.01861	-0.42993	-0.24436	-0.23243	0.049586
9.6551	-0.65592	0.150577	-0.463326	-0.163585	1.47331	0.0306736	-0.162107	-0.59307	0.0264016	-0.032984	0.12246	-0.226849		0.500635	-1.13462	0.2019	-0.857464	0.167547	-0.431698	-0.168574	0.186074	-0.576272	0.444086	-0.166113	-0.017218		0.027561	-0.39396	0.581978	-0.51664	-0.26696	0.461572	0.220295	0.574944	0.048944	0.027272	0.584509	-0.11021		0.154641	-0.54422	0.023859	0.507663	0.389748	-0.04611	-0.35766	-0.20895	-0.18306	0.053966
9.70635	-0.558159	-0.208631	-0.48942	-0.199754	1.61148	-0.478262	-0.237071	-0.580887	-0.043518	-0.117861	0.12114	-0.273722		0.383125	-0.88655	0.0719326	-0.534575	0.546778	-0.518314	-0.17624	0.516131	-0.465544	0.282803	-0.270616	0.421397		-0.08096	-0.28815	0.656642	-0.4851	-0.13451	0.46823	0.101823	0.458502	0.002632	0.110635	0.622849	0.109477		0.258314	-0.48275	0.243068	0.48031	0.470765	-0.02904	-0.33735	-0.34454	-0.3077	-0.01192
9.75759	-0.529031	-0.215012	-0.404533	-0.246648	1.14561	-0.143178	-0.073207	-0.680533	-0.075867	0.210845	0.0262118	-0.226291		0.241387	-1.11666	0.279857	-0.534671	0.595425	-0.350806	-0.210447	0.489105	-0.732941	0.299095	-0.403371	0.031641		-0.02171	-0.40232	0.68312	-0.59312	-0.0637	0.099949	0.172445	0.49796	0.130226	0.190475	0.68207	-0.09711		0.210716	-0.27325	0.293328	0.281002	0.745053	-0.24186	-0.14246	-0.31717	-0.39194	0.030592
9.80883	-0.612789	-0.400676	-0.219142	-0.324908	1.03412	0.288245	-0.254655	-0.472558	-0.200104	-0.090431	0.0896657	-0.203231		0.185662	-0.792747	0.270129	-0.674231	0.490968	-0.571464	-0.386613	0.102418	-0.424308	0.769733	-0.488249	0.147943		-0.10884	-0.40308	0.49673	-0.47226	-0.23414	-0.00364	0.116969	0.347658	0.248127	0.086669	0.51965	-0.21698		0.178027	-0.41274	0.143702	0.440804	0.920211	-0.00178	-0.05564	-0.35825	-0.27551	0.186055
9.86007	-0.582423	-0.156734	-0.207609	-0.547421	0.823828	0.586233	-0.107609	-0.716129	0.131013	0.010337	-0.163142	-0.106685		0.115526	-0.742511	-0.099154	-0.546778	0.460369	-0.024631	-0.315643	0.247446	-0.726815	0.37587	-0.458098	0.363955		-0.16487	-0.28415	0.808831	-0.53762	0.010867	0.190763	0.019154	0.326309	0.216581	0.281323	0.459417	-0.03038		0.232141	-0.41443	0.137221	0.616967	0.847857	0.020995	0.075729	-0.17985	-0.01122	0.187239
9.91131	-0.572809	-0.229382	-0.557211	-0.347567	0.734791	0.295619	-0.080744	-0.90966	-0.246364	0.137777	-0.012054	-0.215775		0.278894	-0.754122	0.26475	-0.496189	0.25534	-0.133638	-0.318588	0.485823	-0.729558	0.385337	-0.407256	0.0869127		-0.03252	-0.05148	0.908234	-0.50985	0.066609	0.348968	0.030969	0.309831	0.105952	0.381102	0.503536	0.104783		0.171192	-0.47216	-0.08578	0.543477	0.924305	-0.25588	0.256776	-0.17409	-0.20437	0.316931
9.96255	-0.621769	-0.431104	-0.159056	-0.484686	0.725391	0.312548	-0.262782	-0.779936	-0.368048	0.494851	-0.108715	0.233234		0.0908665	-0.414248	-0.216401	-0.552026	0.146638	-0.063636	-0.262484	0.0402289	-0.441511	0.489146	-0.049316	0.400181		-0.09613	-0.06435	1.26519	-0.39512	-0.06753	0.379745	0.058449	0.004235	0.170929	0.374234	0.360284	-0.01549		0.166696	-0.5528	-0.02002	0.633464	1.05651	0.144047	0.219015	-0.00746	-0.25858	0.531918
10.0138	-0.73311	-0.842969	-0.399028	-0.38323	0.591465	0.127274	-0.325425	-0.639784	0.0715949	0.129582	0.196573	0.4063		0.0804256	-0.491863	0.11009	-0.281504	0.625208	-0.327886	-0.053271	0.360825	-0.672333	0.603909	-0.039211	-0.40036		-0.16116	0.041667	0.938719	-0.60205	-0.01337	0.094381	0.03292	0.01109	0.152789	0.666523	0.282409	-0.23144		0.143079	-0.42184	-0.1177	0.609817	0.832495	0.33887	0.126129	-0.12433	-0.15323	0.580892
	-0.396295	-0.042699	0.304068	-0.208098	0.18755	-0.689925	-0.282381	0.764586	0.128727	-0.358321	-0.147712	-0.164954		-0.00861	-0.392221	0.100077	0.236652	0.430368	-0.632501	0.580278	-0.096091	-0.15704	1.50823	-0.474381	0.913116		-0.80815	-0.2716	-0.17538	-0.69735	-0.08668	-0.0008	0.079033	-0.20906	-0.6203	0.264821	0.06108	-0.4817		-0.11408	-0.12017	-0.09082	-0.42364	-0.40962	0.021116	-0.30082	-0.21161	-0.1724	-0.4053
	-0.411781	-0.283923	0.145377	-0.381861	0.232034	-1.06152	-0.350525	0.514731	-0.291742	-0.239185	-0.22627	0.465203		0.191812	-0.38839	-0.190935	-0.075407	0.823507	-0.323717	0.626989	-0.366343	-0.357365	1.05258	-1.18988	0.459678		-0.80632	-0.24663	-0.06408	-0.74539	0.061988	-0.11429	0.051481	-0.0887	-0.48834	0.522988	0.159793	0.014041		-0.1333	-0.1835	-0.03957	-0.53514	-0.33575	0.12857	-0.38998	-0.1848	-0.0307	-0.34342
	-0.316952	0.0003462	-0.476829	-0.833991	0.223892	-0.787688	-0.335585	0.701113	-0.266902	-0.212341	-0.163584	0.823249		-0.038784	-0.281994	-0.147463	-0.157988	0.794059	-0.374903	0.261969	-0.402142	-0.296926	0.946016	-0.706661	0.533016		-0.77671	-0.4285	-0.11668	-0.66535	0.108372	-0.19476	-0.0064	-0.18273	-0.5273	0.400276	0.067214	-0.10621		-0.03782	-0.05785	-0.05233	-0.51035	-0.23006	0.009231	-0.30805	-0.30167	-0.04218	-0.37206
	-0.184324	-0.250401	-0.14256	-0.398011	0.380517	-0.811027	-0.398024	0.423847	-0.39672	-0.442782	-0.22954	0.442506		0.038943	-0.011253	-0.147593	0.0359696	0.339925	-0.01692	0.435035	-0.477849	-0.33622	0.938794	-0.975736	0.245199		-0.845	-0.34432	-0.10566	-0.69128	0.343269	-0.50038	-0.1296	-0.15599	-0.60105	0.435329	0.112652	-0.27559		0.038307	-0.0905	-0.32308	-0.52135	-0.21352	-0.20653	-0.34781	-0.30739	-0.08306	-0.1236
	-0.180368	-0.104428	0.150606	-0.932037	0.583145	-0.732642	-0.285712	0.401628	-0.272038	-0.268519	0.0807028	0.254491		0.100072	-0.211785	-0.048735	-0.06085	0.456077	-0.24093	0.0088922	-1.09553	-0.170285	0.643184	-0.322046	0.236474		-0.83419	-0.25866	-0.30736	-0.73846	0.342972	-0.12305	-0.16521	0.135653	-0.44368	0.431919	-0.10261	0.146119		0.055205	0.020613	-0.02623	-0.42103	-0.31529	-0.15681	-0.31107	-0.39232	-0.205	-0.12441
	-0.232311	-0.222188	0.282535	-0.874262	0.770994	-0.7693	-0.172684	0.44259	-0.13529	-0.437384	-0.000526	0.884081		0.0381407	-0.21952	-0.22931	-0.100596	0.512803	-0.371449	0.239529	-0.969409	-0.312535	0.881601	-0.537262	0.215813		-0.87141	-0.47152	-0.29061	-0.61998	0.363373	-0.36244	-0.08848	0.189937	-0.42991	0.422222	-0.15437	0.183459		0.037597	0.143456	-0.02266	-0.4522	-0.26091	-0.00481	-0.31535	-0.40034	-0.21882	-0.17512
	-0.244814	-0.548132	0.111872	-0.773307	0.45733	-0.460109	-0.131825	0.503465	-0.281531	0.0558381	0.0567328	0.65769		-0.033491	0.0676077	-0.228719	-0.237806	0.437955	-0.160092	0.118623	-0.864615	-0.506343	1.03804	-0.97347	0.0018386		-0.8591	-0.39435	-0.03984	-0.63699	0.259771	-0.25999	-0.18055	0.131844	-0.2189	0.253758	0.002684	-0.0068		0.15549	0.283451	0.045695	-0.54253	-0.39874	0.053326	-0.28758	-0.48458	-0.35904	-0.14797
	-0.221362	-0.547555	0.514123	-0.865862	0.298638	-0.358831	0.0134577	0.399639	-0.591364	-0.135661	-0.025274	0.714631		-0.135317	-0.242619	-0.345568	-0.413386	0.725929	-0.514372	-0.068949	-0.754668	0.205609	1.22049	-0.882088	0.226514		-0.75594	-0.2667	-0.35601	-0.56569	0.007386	-0.47844	-0.06086	0.075682	-0.43834	0.01288	-0.10903	0.013124		0.048505	0.320247	0.014706	-0.56378	-0.3296	-0.17904	-0.30214	-0.48774	-0.22893	-0.12383
	-0.218952	-0.71317	0.45424	-0.891007	-0.24089	-0.406616	-0.101098	0.280195	-0.90864	-0.080493	-0.187969	0.667776		-0.135918	-0.161746	-0.156252	0.0616659	0.510866	-0.551096	0.0794425	-0.404692	-0.138452	0.943207	-0.677771	0.335758		-0.74035	-0.40956	-0.25178	-0.63811	0.011405	-0.06339	0.042012	0.226764	-0.72328	-0.01175	-0.05332	0.043229		-0.02681	0.293576	-0.11361	-0.43287	-0.44585	-0.21456	-0.26815	-0.23804	-0.41209	-0.13004
	-0.202604	-0.542596	0.120819	-1.1495	-0.069869	-0.651078	-0.096587	0.131958	-0.366114	-0.270533	-0.124596	0.203517		-0.143418	0.119363	-0.170713	-0.422897	0.589056	-0.331468	0.177811	-0.381658	-0.025854	0.61994	-1.10775	0.0455903		-0.67122	-0.31263	-0.36852	-0.70798	-0.07416	0.389615	0.274957	0.178895	-0.56789	0.006466	-0.09561	0.107833		-3.9e-05	0.455095	-0.04836	-0.48591	-0.38048	-0.12584	-0.22606	-0.25613	-0.06002	-0.18498
	-0.337216	-0.706862	0.612219	-0.908246	-0.045261	-0.598257	-0.052727	0.164204	-0.350759	-0.285263	-0.14759	0.674225		-0.181534	0.481657	-0.200044	-0.450488	0.539554	-0.493233	0.239496	-0.107561	-0.135974	0.726159	-0.888057	0.0520002		-0.82723	-0.33873	-0.41341	-0.63222	-0.09728	-0.03117	0.290451	0.195608	-0.29791	-0.18162	-0.10806	-0.28345		0.02464	0.473068	-0.12397	-0.39791	-0.43273	-0.07322	-0.1726	-0.29343	-0.46602	-0.08599
	-0.396655	-0.81072	-0.010031	-0.904966	-0.240607	-0.934874	-0.242916	0.138591	-0.449235	0.0473111	-0.18663	0.238148		-0.234944	0.424469	-0.420436	-0.351402	1.14422	-0.840383	0.277214	-0.327473	-0.289539	0.482733	-0.94284	0.0872849		-0.81309	-0.21367	-0.67867	-0.66228	-0.09008	0.095753	0.401088	0.31737	-0.42128	-0.25744	-0.26196	0.297279		-0.07941	0.405129	0.124923	-0.54736	-0.38747	-0.21841	-0.10598	-0.15915	-0.36609	-0.06469
	-0.343923	-0.781398	0.533887	-0.606416	0.0339925	-0.701246	-0.312185	0.0433554	-0.094796	-0.040171	-0.260702	0.40539		-0.051434	0.161505	-0.394073	-0.766027	0.831834	-0.855231	0.210827	0.180576	-0.053343	0.756725	-0.759909	0.209776		-0.81998	-0.40079	-0.28305	-0.77636	-0.09458	-0.17042	0.308716	0.278989	-0.68867	-0.38725	-0.09916	-0.05062		-0.14137	0.274866	0.081443	-0.41154	-0.25506	-0.16354	-0.07312	-0.47194	-0.1289	-0.11987
	-0.330285	-0.357163	0.240773	-0.684261	0.0457051	-0.589104	-0.178626	0.059098	-0.229426	0.0890836	-0.244491	0.137873		-0.192742	0.0856277	-0.17957	-0.296784	0.524347	-0.771859	0.130132	-0.036547	0.24856	0.522267	-0.749448	0.129244		-0.72401	-0.50145	-0.51381	-0.5467	-0.12977	0.396806	0.251935	0.130492	-0.58578	-0.54796	-0.32022	0.265273		-0.10306	0.326253	0.138432	-0.51366	-0.2057	-0.19529	0.046499	-0.40752	-0.15698	-0.09472
	-0.374763	-0.422639	0.190372	-0.666473	0.0985642	-0.564825	-0.338469	0.229531	-0.406498	0.0027001	-0.521867	0.379515		-0.01202	0.556195	0.0365416	-0.053093	0.344047	-0.709697	0.0507536	0.076402	0.258031	0.347298	-0.696263	0.0095428		-0.83073	-0.38397	-0.44284	-0.70471	-0.12087	0.062171	0.200791	0.074636	-0.68391	-0.35068	-0.29371	0.047703		-0.22055	0.293979	-0.19098	-0.36704	-0.27606	-0.22469	-0.016	-0.46605	-0.36745	-0.11383
	-0.433626	-0.15597	0.314271	-0.756642	-0.072969	-0.688696	-0.335684	0.446364	-0.341657	0.0130282	-0.437491	-0.055729		-0.023931	0.341396	-0.367715	-0.387194	0.717257	-0.731762	0.199427	0.292455	0.226352	0.385127	-0.808343	-0.346548		-0.76111	-0.39301	-0.24622	-0.58503	-0.06123	-0.04243	0.170402	0.081334	-0.86807	-0.27355	-0.12172	-0.02123		-0.10854	0.228946	0.04875	-0.46616	-0.32042	-0.03546	-0.11644	-0.47861	-0.25443	-0.04698
	-0.463349	-0.205202	-0.054283	-0.780052	0.352136	-0.810518	-0.395255	0.561727	-0.2851	-0.022815	0.124894	0.0382273		-0.00992	-0.043681	-0.278607	-0.304736	0.488917	-0.363665	0.339428	0.114293	-0.25001	0.0021228	-0.797629	-0.082206		-0.62663	-0.46867	-0.24925	-0.4711	-0.21373	0.314414	0.105101	-0.09168	-0.74033	-0.41257	-0.13741	-0.39728		-0.07396	0.38202	0.044068	-0.49427	-0.23101	-0.07876	0.081799	-0.32846	-0.07506	-0.21905
	-0.655446	0.0352591	-0.000742	-0.721967	0.0279257	-0.634475	-0.329134	0.178054	-0.299821	0.149833	0.0822778	0.400441		0.236807	0.0446542	-0.336821	-0.263082	0.621043	-0.754873	0.247298	0.249805	0.334207	0.179143	-0.541904	0.315207		-0.65535	-0.35249	-0.48494	-0.60396	-0.20265	-0.02859	0.149281	-0.21964	-0.55872	-0.41868	-0.01143	-0.22827		0.203563	0.345862	0.062973	-0.6129	-0.34142	-0.29865	-0.14316	-0.40584	-0.1443	-0.16127
	-0.492866	-0.079688	0.115927	-0.699121	0.0763118	-0.635867	-0.410081	0.319	-0.48998	0.24906	0.0322648	0.409402		0.293684	0.277057	-0.240598	-0.215048	0.710172	-0.479653	0.245479	-0.217043	0.0087957	-0.12594	-0.887013	0.324649		-0.58907	-0.08916	-0.44712	-0.61566	-0.41735	-0.34226	-0.03723	0.008101	-0.44932	-0.47215	-0.02044	-0.26583		0.209333	0.284638	0.069514	-0.48603	-0.5345	-0.06204	-0.19591	-0.49492	-0.43538	-0.26101
	-0.555203	-0.21272	0.417681	-0.439505	0.0249533	-0.642024	-0.26557	0.389592	-0.116373	0.510097	-0.289412	-0.022789		0.178096	0.299795	-0.231244	-0.687387	0.401198	0.0712877	0.21594	0.202905	0.348773	0.117752	-0.476887	0.170726		-0.3679	-0.28822	-0.13114	-0.5294	-0.43486	-0.1939	-0.03837	0.015271	-0.44499	-0.4424	0.144047	-0.10521		0.050149	0.177227	-0.15334	-0.57485	-0.3298	0.006015	-0.17744	-0.30645	-0.25422	-0.12886
	-0.369818	-0.381839	-0.065758	-0.862249	-0.017482	-0.691225	-0.441269	0.433887	0.0530137	0.131583	0.091084	-0.058634		0.142868	0.140612	-0.365347	-0.872464	0.768843	-0.57338	0.189919	-0.066217	0.116679	0.126971	-0.665537	0.0433622		-0.40427	-0.18997	-0.02215	-0.58289	-0.55069	-0.15342	0.022722	0.070666	-0.51742	-0.16029	-0.04441	-0.37875		0.106097	0.076623	-0.06008	-0.59261	-0.31753	0.085576	-0.08768	-0.35526	-0.24478	-0.11955
	-0.464135	-0.380109	0.0526895	-0.83588	0.0652759	-0.854491	-0.200607	0.446997	0.0621336	0.0778367	-0.217681	0.229451		0.0800515	0.361266	-0.366551	-0.808065	0.838038	-0.636054	0.154352	-0.279014	0.170693	0.172251	-0.546293	0.0282735		-0.38904	-0.25677	-0.21007	-0.5125	-0.46777	-0.08538	-0.01491	-0.10026	-0.33899	-0.30244	-0.05086	-0.06567		0.110012	0.158287	-0.01546	-0.56803	-0.25705	0.303499	-0.18717	-0.26439	0.138468	-0.23777
	-0.446399	-0.565626	0.266878	-0.731079	0.853334	-0.963653	-0.192934	0.219915	0.596467	-0.144512	-0.194937	0.311563		-0.05775	0.521574	-0.295848	-0.54607	0.813918	-0.699548	0.107174	-0.539308	0.292588	0.0289382	-0.673391	-0.071445		-0.56717	-0.25727	-0.16402	-0.6532	-0.26905	-0.08131	-0.00313	-0.10042	-0.65962	-0.2394	-0.03981	-0.02897		0.122115	0.114217	-0.29267	-0.49701	-0.24699	0.33468	0.053325	-0.33419	-0.04725	-0.30541
	-0.446296	-0.514482	0.16023	-0.67417	0.51061	-0.902956	-0.284904	0.138543	0.506603	0.0932884	-0.135038	-0.213126		-0.083781	0.629598	-0.874745	-0.592824	0.370107	-0.511452	0.046816	-0.727341	0.215059	0.049613	-0.57897	-0.467016		-0.52109	-0.224	-0.12743	-0.63816	-0.04234	-0.19789	-0.0406	0.046506	-0.47487	-0.41349	-0.06437	-0.202		-0.04995	0.205371	-0.20859	-0.53457	-0.22763	0.202771	-0.00052	-0.16709	-0.17868	-0.51205
	-0.467733	-0.521751	0.429763	-0.738815	0.422537	-0.847429	-0.380345	0.0455029	0.354148	0.111888	-0.386582	-0.09788		0.0331459	0.431325	-0.263088	-0.406822	0.843665	-0.961216	0.0640454	-0.767802	0.0507773	-0.314279	-0.654985	0.269361		-0.57153	-0.11586	-0.02063	-0.60818	-0.05092	-0.39771	-0.08799	-0.01516	-0.73261	-0.25266	-0.03634	-0.16685		0.078497	0.217462	-0.43271	-0.41766	-0.29087	0.416157	0.065143	-0.41383	-0.23221	-0.41001
	-0.630203	-0.635004	0.590232	-0.658346	0.491069	-0.541459	-0.26501	0.206219	0.631676	0.171719	-0.050803	-0.246876		-0.147005	0.602671	-0.089036	-0.688426	0.836353	-0.943948	-0.069862	-1.0803	0.115749	-0.333347	-0.738322	-0.008033		-0.60632	-0.10111	-0.12612	-0.73312	-0.09166	-0.3413	-0.02911	0.017347	-0.53023	-0.40601	-0.00371	-0.0229		-0.0923	0.262892	-0.30542	-0.5625	-0.31497	0.284298	0.214908	-0.29853	-0.24096	-0.45608
	-0.620042	-0.313156	0.380997	-1.03342	0.950802	-0.747801	-0.221324	0.531548	0.30079	0.40653	-0.147826	0.0520155		-0.079631	0.841768	-0.416862	-1.0151	0.604103	-1.03225	0.0320346	-1.00205	-0.020628	-0.247842	-0.548644	0.755919		-0.58204	-0.36916	0.078201	-0.50048	0.016323	0.204067	0.033342	0.166862	-0.44798	-0.4578	-0.11016	0.104286		-0.01409	0.34549	0.016412	-0.5172	-0.30103	0.22693	0.195262	-0.36575	-0.30746	-0.38154
	-0.569313	-0.322994	0.373232	-0.992252	0.545705	-0.664817	-0.211811	0.72491	0.207235	0.731729	-0.173272	0.637722		-0.15182	0.973536	-0.412137	-0.468806	0.522312	-0.398825	-0.109613	-1.03326	-0.206513	0.0196446	-0.890415	0.885196		-0.65373	-0.44873	0.062809	-0.66402	0.086149	0.320758	-0.07706	0.346512	-0.42623	-0.26163	-0.04135	0.094654		0.011417	0.469148	0.249836	-0.5641	-0.25035	0.228652	0.145308	-0.35358	-0.23305	-0.50388
	-0.544853	-0.295744	0.599737	-1.03198	0.439336	-0.53375	-0.118646	0.526248	0.734105	0.526485	-0.440597	-0.005519		-0.079235	0.806375	-0.301544	-0.470453	0.67952	-0.425673	-0.043091	-0.934407	0.0060202	-0.147085	-0.32266	0.556407		-0.53962	-0.44427	0.557633	-0.83211	-0.13851	-0.09283	-0.09029	0.244039	-0.46685	-0.22227	-0.07722	-0.00319		0.09687	0.486525	-0.04983	-0.70423	-0.21915	0.334462	0.176249	-0.47719	-0.47338	-0.6241
	-0.654243	-0.149772	0.371881	-0.862625	0.538193	-0.581207	-0.239874	0.254494	0.479662	0.409793	-0.200206	-0.05993		-0.106847	0.842191	-0.024574	-0.275721	1.1645	-0.654875	-0.052621	-0.933538	-0.205431	0.107845	-0.850488	0.252904		-0.61156	-0.38955	0.392474	-0.79471	-0.13331	0.013772	0.062309	0.180803	-0.5212	-0.21722	0.042905	-0.50125		0.069636	0.353699	0.163163	-0.59817	-0.29704	0.254096	0.093098	-0.523	-0.27459	-0.51717
	-0.633241	-0.391689	0.532193	-0.912161	0.478798	-0.404771	0.0510981	0.0496133	0.623737	0.598791	-0.330822	0.0974173		-0.239934	0.650529	-0.241137	-0.363136	0.663478	-0.656428	0.0497757	-0.79674	-0.125248	-0.275429	-0.659461	-0.058085		-0.55913	-0.29206	0.543548	-0.67066	-0.28671	-0.20182	-0.02988	0.202033	-0.45954	-0.09763	-0.01546	0.070013		0.057339	0.366363	0.043225	-0.49328	-0.31661	0.07946	0.138001	-0.51446	-0.48058	-0.46504
	-0.655283	-0.421822	0.629423	-0.69548	0.164394	-0.242115	0.0434268	0.119071	0.473311	0.479777	-0.243117	-0.035697		-0.200574	0.596803	0.0280555	-0.324028	0.253072	-0.451778	-0.133405	-0.932438	-0.347703	-0.361472	-0.499737	0.0608483		-0.63897	-0.32227	0.273847	-0.72738	-0.27583	0.019528	0.061574	0.244498	-0.5495	-0.15743	0.028492	0.05342		0.130803	0.55154	0.253116	-0.38571	-0.40533	0.168322	-0.07146	-0.54052	-0.08582	-0.63149
	-0.727599	-0.150825	-0.135741	-0.693771	-0.018202	-0.349616	0.0207539	0.240937	0.396382	0.38951	-0.385555	0.110974		-0.312764	0.674946	-0.28683	-0.264527	0.493116	-0.673852	-0.137363	-0.807775	0.178395	-0.041719	-0.663228	-0.016106		-0.60953	-0.13093	0.339217	-0.69263	-0.12937	-0.02071	0.058628	0.110634	-0.46829	-0.16551	0.055468	-0.31238		0.162366	0.575096	0.114842	-0.42555	-0.3644	0.098998	-0.12935	-0.62007	-0.06358	-0.65223
	-0.596882	-0.360929	0.386562	-0.634898	-0.041958	-0.785907	-0.028438	0.141714	0.565771	0.658706	-0.246545	-0.300588		-0.349979	0.973604	-0.220675	-0.336125	0.646016	-0.334217	-0.18868	-1.0416	-0.14177	-0.470431	-1.00927	0.108277		-0.48517	-0.21563	0.149549	-0.60709	-0.27522	0.128632	-0.05809	0.122879	-0.3725	-0.31366	0.017116	-0.09517		0.145865	0.46489	-0.3308	-0.51913	-0.33546	-0.16794	-0.14291	-0.4929	0.137396	-0.51588
	-0.695705	-0.20429	-0.303837	-0.830951	-0.002466	-0.776724	-0.217312	0.0782973	0.253555	0.498495	-0.329671	0.335815		-0.177673	0.336324	0.363062	-0.145308	0.691366	-0.422067	-0.111063	-1.11858	0.398884	-0.39649	-0.344212	-0.152941		-0.50203	-0.09187	-0.14668	-0.55035	-0.37967	-0.05023	-0.08523	0.072363	-0.57858	-0.05015	0.055511	-0.16889		0.092024	0.347244	-0.05636	-0.4828	-0.18556	-0.08282	-0.14263	-0.29562	0.021345	-0.61033
	-0.510252	-0.317533	-0.170892	-0.619058	-0.000199	-0.659347	-0.13792	0.090006	0.346391	0.339068	-0.286623	-0.086469		-0.041847	0.367586	0.0630508	-0.411032	0.198979	-0.384911	-0.154275	-1.34062	-0.009826	-0.11273	-0.755652	-0.289505		-0.38426	-0.05454	0.0588	-0.61215	-0.24242	0.275683	-0.02135	-0.07522	-0.5927	-0.1448	-0.07046	-0.22755		0.177821	0.310991	-0.15814	-0.5437	-0.23385	-0.13457	-0.00225	-0.23264	-0.25421	-0.61277
	-0.52201	-0.241809	-0.124088	-0.734411	0.0015956	-0.467122	-0.153864	0.461441	0.785252	0.269177	-0.08201	0.28068		-0.21773	-0.243808	0.309152	-0.273557	0.685203	-0.34158	0.0482216	-0.854388	-0.149952	-0.235744	-0.859952	-0.408311		-0.51293	-0.04586	-0.08573	-0.63075	-0.1706	-0.00929	0.017362	0.134009	-0.68018	-0.07644	-0.046	-0.62163		0.190983	0.106981	-0.04908	-0.57581	-0.19832	-0.25331	0.159367	-0.1984	-0.06146	-0.46016
	-0.670966	-0.020966	-0.308831	-0.649153	0.147392	-0.920548	-0.254788	0.219034	0.47567	0.553412	0.168371	0.274081		-0.215404	0.0258752	0.409068	-0.357122	0.454099	-0.163577	0.052044	-0.634446	-0.151308	-0.235657	-0.824313	-0.439756		-0.5475	0.163171	-0.30461	-0.62438	-0.39083	-0.02549	-0.09031	0.228368	-0.31045	0.111598	-0.15498	-0.16051		0.079993	0.112918	0.057395	-0.52455	-0.23093	-0.05063	-0.01621	-0.22022	-0.17198	-0.32929
	-0.598857	-0.142084	0.151685	-0.854038	-0.136248	-0.467732	-0.270423	0.264392	0.350274	0.322916	0.687642	0.299634		-0.148176	-0.098755	0.215402	-0.410349	0.583176	-0.325861	0.0084091	-0.544201	0.419893	-0.234626	-0.853457	-0.130258		-0.67692	0.003031	-0.21576	-0.57389	-0.34082	-0.35427	-0.13206	0.05917	-0.59627	0.170191	-0.2384	-0.07362		0.077356	0.226895	0.109651	-0.55519	-0.32731	-0.15554	0.089749	-0.3174	-0.07216	-0.51622
	-0.558787	-0.43583	-0.065966	-0.909579	-0.411074	-0.878764	-0.203414	0.449192	0.707341	0.320809	0.623892	0.543244		-0.044675	-0.430263	0.305532	-0.168135	0.792756	-0.368482	-0.124923	-1.14843	0.149057	0.0199507	-0.976303	-0.423141		-0.83796	-0.18189	-0.21749	-0.74465	-0.0983	-0.32652	-0.16083	0.116829	-0.39418	0.1077	-0.19026	-0.37234		0.142218	0.178938	0.000292	-0.64126	-0.23816	-0.15589	0.055956	-0.19843	-0.06116	-0.26156
	-0.649852	-0.294206	-0.141537	-0.978925	-0.361789	-0.997894	-0.315008	0.150742	0.0468176	0.0451076	0.547181	0.684374		-0.026399	-0.808678	0.0812897	-0.451628	0.672922	-0.514606	-0.175619	-0.958776	0.26632	-0.061489	-0.589511	-0.080303		-0.79712	0.140808	-0.28776	-0.92149	-0.07252	-0.1349	-0.24429	0.140589	-0.46808	0.055926	-0.24328	-0.60796		-0.03503	0.099401	0.146338	-0.42642	-0.17027	-0.12253	0.047379	-0.11776	-0.05184	-0.44456
	-0.43767	-0.303523	0.0934476	-0.787159	-0.212755	-0.97877	-0.126675	0.126186	0.317518	0.26778	0.570462	0.426841		0.178073	-0.40626	0.304197	-0.493875	0.887929	-0.376099	-0.150591	-0.668477	0.248265	-0.064355	-0.857265	-0.338705		-0.72808	-0.21499	-0.62068	-0.76906	-0.14663	-0.32564	-0.24626	0.107969	-0.48532	0.090164	-0.14297	-0.42879		0.042286	-0.01016	0.237299	-0.54797	-0.25687	-0.32035	0.062126	0.044962	-0.34801	-0.43426
	-0.692783	-0.286569	0.149869	-1.00865	-0.399977	-1.06592	-0.113819	0.180332	0.300325	0.0155274	0.915542	0.763679		0.144038	-0.066415	0.274823	-0.392113	0.42662	-0.540015	-0.109695	-0.99532	0.103704	0.126963	-0.443984	-0.163145		-0.72364	-0.26303	-0.45298	-0.86254	-0.15425	-0.21914	-0.19299	-0.15014	-0.52542	0.081859	-0.10964	-0.42162		0.046149	0.074185	-0.03595	-0.50637	-0.20231	-0.21167	0.023034	-0.10346	-0.01642	-0.21232
	-0.733972	-0.449	0.110847	-0.891748	-0.528807	-1.15152	-0.244028	-0.014548	0.519713	0.0083002	1.27015	0.459863		0.0268727	-0.103755	-0.029963	-0.638513	0.625364	-0.515335	-0.251691	-1.31894	-0.037263	-0.142754	-0.506183	0.0718986		-0.70848	-0.40097	-0.41496	-0.73657	-0.22309	-0.0319	-0.29145	0.001639	-0.25288	0.001749	-0.04741	-0.20972		0.183933	-0.02507	-0.01143	-0.60808	-0.11929	-0.12175	-0.00503	-0.02345	-0.5381	-0.24015
	-0.632625	-0.430817	-0.315083	-0.80367	-0.50309	-0.933003	-0.357241	-0.149126	0.132788	-0.206782	1.04601	0.516435		-0.023666	-0.104669	0.40416	-0.42418	0.681576	-0.5623	-0.132883	-1.2579	-0.370925	-0.244026	-0.127567	-0.143737		-0.7	-0.3709	-0.44492	-0.57117	-0.08541	-0.09172	-0.31035	-0.1055	0.178055	0.088482	-0.21033	0.209549		0.359507	0.111899	-0.07606	-0.53153	-0.11594	-0.21927	0.028978	-0.12883	-0.1104	-0.17799
	-0.708988	-0.513667	-0.1882	-1.05994	-0.507155	-1.10783	-0.187068	-0.416076	0.549366	0.0853468	1.21963	0.805595		-0.231625	-0.119355	0.167671	-0.620699	0.433948	-0.51907	-0.08873	-1.33309	-0.278175	0.0247567	-0.287436	-0.09879		-0.66801	-0.55429	-0.39575	-0.55108	-0.08679	-0.29148	-0.26218	-0.2402	-0.25375	0.259516	-0.00147	0.022768		0.477847	0.129503	-0.08736	-0.37978	-0.17855	0.034956	-0.01186	-0.06872	-0.05867	0.107244
	-0.804852	-0.30564	-0.096407	-0.775947	-0.094128	-0.914142	-0.070105	-0.409159	0.0125951	0.279521	0.625918	0.468872		-0.288997	0.118183	0.120069	-0.914612	0.67329	-0.67927	-0.17423	-1.38057	-0.302767	-0.052896	-0.441974	-0.434285		-0.70108	-0.43596	-0.34518	-0.45708	-0.25774	-0.35361	-0.17799	-0.25401	-0.10361	0.181688	-0.0754	-0.37596		0.674421	0.344835	-0.08158	-0.32136	-0.3191	-0.21381	-0.22827	-0.15088	-0.21813	-0.09927
	-0.736846	-0.58606	-0.016049	-0.520366	-0.475772	-1.236	0.136633	-0.583269	0.260316	0.157118	0.541121	0.937798		-0.198256	0.586452	-0.076333	-0.548971	0.633557	-0.721172	-0.210512	-1.20199	-0.45612	-0.391687	-0.414862	-0.31962		-0.63339	-0.6606	-0.50552	-0.5351	-0.27593	-0.45581	-0.12334	-0.27961	-0.34056	0.298833	-0.1948	0.088384		0.834431	0.444787	-0.12123	-0.47686	-0.346	-0.12615	-0.28824	-0.08531	-0.29749	0.081327
	-0.737135	-0.576643	-0.06354	-0.818145	-0.487524	-1.17914	0.0129971	-0.605974	0.21634	0.195974	0.0426957	0.816621		-0.130855	0.422957	0.445507	-1.03845	0.821032	-1.04828	-0.167647	-1.02991	-0.075965	-0.106803	-0.684838	-0.25651		-0.65015	-0.5395	-0.43304	-0.53914	-0.35645	-0.44909	-0.20655	-0.2785	-0.34712	0.357166	0.026374	-0.06627		0.76244	0.290353	-0.05707	-0.35031	-0.34044	-0.14436	-0.17704	-0.24908	0.127907	-0.02803
	-0.653793	-0.692501	-0.238276	-0.934204	-0.418327	-0.998509	-0.142005	-0.377097	0.116789	0.405409	0.0471687	0.594966		-0.245004	0.248395	0.412319	-0.883852	0.765662	-0.571699	-0.101854	-0.581208	-0.79508	-0.237229	-0.756509	-0.065983		-0.58836	-0.48585	-0.71472	-0.52209	-0.28857	-0.32739	-0.13034	-0.30372	-0.4817	0.379333	-0.11195	0.170547		0.699277	0.440344	-0.14915	-0.49639	-0.46344	0.12351	-0.31591	-0.04967	0.007607	-0.0178
	-0.614552	-0.532894	0.0701158	-0.901555	-0.257836	-0.895061	-0.163381	-0.406539	-0.297095	0.376936	-0.13774	0.955617		-0.267956	0.526531	0.566698	-0.367894	0.934383	-0.525961	-0.169923	-0.854136	-0.65028	-0.238094	-0.770408	-0.485497		-0.639	-0.64509	-0.4932	-0.5679	-0.24898	-0.31959	-0.18812	-0.277	-0.34928	0.276147	-0.11652	0.174974		0.549576	0.621592	-0.02638	-0.44472	-0.37113	0.15513	-0.26032	-0.02311	-0.01573	-0.01538
	-0.775859	-0.382239	-0.045535	-0.827891	-0.21736	-1.38858	-0.208544	-0.246325	0.0937153	0.41275	-0.323811	0.829611		-0.295188	0.0547759	0.0260793	-0.10427	0.796504	-0.106901	-0.088965	-1.13046	-0.686769	-0.012333	-0.786888	-0.073975		-0.51731	-0.45026	-0.42353	-0.56285	-0.28036	-0.30699	-0.17146	-0.3793	-0.44699	0.026068	-0.18881	-0.13369		0.555425	0.513766	0.196071	-0.5211	-0.35908	-0.11341	-0.39081	0.064521	-0.52373	-0.05651
	-0.700921	-0.703844	-0.123751	-1.10288	-0.407386	-1.01034	-0.223887	-0.129873	-0.235671	0.505053	-0.012993	0.731309		-0.328314	-0.111852	0.056459	-0.637067	0.707637	-0.267024	0.412873	-0.989184	-0.407641	-0.438708	-0.647434	0.0300385		-0.50743	-0.40282	-0.45153	-0.6466	-0.20372	-0.27962	-0.08505	-0.30455	-0.58438	0.085411	-0.21612	-0.20755		0.294915	0.433622	-0.01835	-0.48217	-0.38188	0.032779	-0.2982	0.041434	-0.20879	0.073769
	-0.68404	-0.518887	-0.165652	-1.13231	-0.020791	-1.03632	-0.171248	-0.307311	-0.464288	0.272708	-0.092023	0.809712		-0.248986	0.0354721	0.0646065	-0.374002	0.300702	-0.118458	0.395955	-1.12515	-0.213115	-0.257543	-0.824633	-0.345834		-0.48283	-0.64301	-0.4464	-0.74575	-0.23339	-0.40516	-0.0454	-0.3632	-0.64579	0.018564	-0.19147	0.049007		0.521798	0.568847	0.045345	-0.64451	-0.34591	0.007866	-0.37256	0.205535	-0.62291	-0.23785
	-0.563532	-0.452841	-0.454972	-1.01413	-0.436625	-1.20887	-0.327085	-0.493015	-0.234272	0.0019124	-0.274384	1.35863		-0.255512	0.403217	0.112386	-0.183276	0.0702108	-0.185664	0.375533	-1.00943	-0.025231	-0.276398	-0.54853	0.251872		-0.40816	-0.66709	-0.62369	-0.78252	-0.24056	-0.2553	0.2049	-0.15167	-0.3838	0.083535	-0.16684	0.045681		0.591707	0.449605	-0.08349	-0.54341	-0.19304	-0.00019	-0.44499	0.304301	-0.45669	-0.1642
	-0.695638	-0.266654	-0.385399	-1.25547	-0.515097	-1.10665	-0.121416	-0.298852	-0.349693	0.118689	-0.006965	0.768734		-0.041394	0.408697	-0.048128	-0.544768	0.572943	-0.213475	0.477546	-1.07625	0.271003	-0.572147	-0.594515	0.41465		-0.39517	-0.54382	-0.31331	-0.48421	-0.10516	-0.53335	0.217443	-0.17478	-0.39462	0.057912	-0.22244	-0.20866		0.636499	0.377494	0.038685	-0.54694	-0.05861	0.032632	-0.33812	0.433764	-0.01009	-0.0631
	-0.734305	-0.377556	-0.282111	-1.1457	-0.330284	-0.913233	-0.220506	-0.511041	-0.242353	0.346365	-0.125638	0.63276		-0.246178	0.34847	0.242687	-0.669808	0.290422	-0.34153	0.28549	-1.02962	-0.123187	-0.34626	-0.711902	0.356637		-0.43341	-0.45285	-0.21979	-0.47543	-0.13202	-0.21033	0.138949	-0.19356	-0.23594	0.105307	-0.35047	-0.04417		0.633766	0.453337	-0.02903	-0.46737	-0.00649	-0.0586	-0.47379	0.538764	-0.18901	-0.19143
	-0.756319	-0.255087	0.128118	-0.753719	-0.416025	-0.993597	-0.073725	-0.398475	-0.133254	-0.04118	-0.099051	0.866171		-0.220157	-0.006193	0.189307	-0.497079	0.276668	-0.18204	0.631278	-0.870198	-0.34103	-0.358661	-0.307009	-0.211669		-0.27735	-0.62435	-0.48509	-0.52677	-0.22896	-0.36564	0.090318	-0.0419	-0.14163	-0.0169	-0.0054	-0.39544		0.539857	0.321291	-0.1026	-0.45838	-0.03592	-0.01364	-0.45429	0.170035	-0.20432	-0.02026
	-0.63063	-0.344423	0.0449692	-0.841472	-0.294675	-1.01371	-0.05412	-0.438346	-0.306607	-0.011275	-0.276269	0.492078		-0.022452	-0.172281	0.533157	-0.369937	0.461888	-0.178254	0.618276	-0.560225	-0.472701	-0.480098	-0.587293	0.183587		-0.36852	-0.65629	-0.12705	-0.59652	-0.3141	-0.23428	-0.08208	-0.1306	-0.11283	-0.15086	-0.11356	0.08336		0.699558	0.259708	0.057731	-0.33186	-0.15633	0.24142	-0.33347	0.183336	-0.37398	-0.08817
	-0.638705	-0.446845	0.0898026	-0.997387	-0.259926	-0.843476	-0.092808	-0.458068	-0.347188	-0.045178	-0.407296	0.491313		-0.016281	-0.153105	0.402319	-0.262946	0.940964	-0.576077	0.540376	-0.933801	-0.433327	-0.02157	-0.511419	0.60943		-0.41231	-0.48969	-0.16007	-0.56786	-0.21217	-0.17091	-0.00112	-0.07975	-0.16096	-0.15337	-0.09837	-0.44997		0.564337	0.290463	0.17433	-0.63579	-0.14894	0.370905	-0.36951	-0.09274	-0.38239	0.038825
	-0.706438	-0.744588	0.226301	-0.853314	-0.17759	-1.00522	-0.063773	-0.339288	-0.411441	-0.175613	-0.401321	0.686203		-0.031612	0.318085	0.394961	-0.221398	1.24207	-0.458359	0.501807	-0.765013	-0.33378	-0.242946	-1.15637	0.620294		-0.48602	-0.48733	-0.37731	-0.56933	-0.29786	-0.19406	-0.07672	-0.15749	-0.19379	-0.07565	-0.06466	-0.25501		0.577317	0.268451	-0.1451	-0.41206	-0.08492	0.398459	-0.40645	-0.09746	-0.10904	-0.18085
	-0.608736	-0.783476	-0.220083	-0.528736	0.0152551	-1.08664	-0.136128	-0.181391	-0.364584	0.256485	-0.214672	0.579345		0.0708798	-0.141704	-0.109162	-0.06077	1.19435	-0.386106	0.519669	-0.668384	-0.348556	-0.189745	-0.626234	-0.084496		-0.43817	-0.46674	-0.58745	-0.5511	-0.19355	-0.30529	-0.09553	-0.01465	-0.2592	-0.06501	0.007116	-0.17095		0.504792	0.241872	-0.10526	-0.305	-0.3004	0.35081	-0.36876	-0.26617	-0.32489	-0.21895
	-0.527498	-0.515884	-0.027805	-0.491403	-0.115687	-0.932521	-0.187362	-0.295049	-0.212547	0.106811	-0.233421	0.546868		-0.295455	-0.090253	0.107083	-0.304205	0.781584	-0.246405	0.599851	-0.706527	-0.447068	0.131477	-0.8534	0.000449		-0.48106	-0.16582	-0.60814	-0.5569	-0.28428	-0.19778	-0.12615	-0.06865	-0.45106	-0.15384	0.05322	-0.14376		0.423773	0.213935	0.172364	-0.46709	-0.33802	0.152507	-0.29999	-0.33895	-0.08368	-0.22745
	-0.454493	-0.906245	-0.040545	-0.813436	-0.062033	-1.35275	-0.102588	-0.186411	-0.162068	-0.231009	-0.300425	0.821484		0.0352179	-0.051196	0.0617741	-0.455556	0.919293	-0.395822	0.573638	-0.62548	0.083723	0.0789569	-0.697246	-0.032839		-0.5408	-0.2482	-0.43353	-0.63224	-0.25161	0.102502	-0.12568	-0.31701	-0.24837	-0.09676	-0.133	0.011091		0.444856	0.213495	-0.1347	-0.39427	-0.27774	-0.02168	-0.14152	-0.18293	-0.28467	-0.16901
	-0.588956	-0.837269	0.0763289	-0.720852	-0.494937	-1.09948	0.023241	-0.035538	-0.184894	-0.233007	-0.205667	0.409206		-0.1862	-0.023193	0.367877	-0.357246	0.903365	-0.193867	0.561422	-0.858195	-0.057496	-0.021731	-0.675378	-0.361548		-0.42091	-0.01753	-0.49536	-0.48336	-0.20882	0.125574	-0.14044	-0.35251	-0.41108	0.030129	-0.26204	0.228656		0.382701	0.180607	-0.1731	-0.30375	-0.44852	0.070451	-0.18344	-0.33088	-0.07319	-0.09218
	-0.61729	-0.835642	-0.003338	-0.44039	-0.467847	-0.792075	-0.206851	-0.020077	-0.595301	-0.141919	-0.189744	0.660525		-0.143742	0.188168	0.005598	-0.365303	0.66087	-0.699609	0.420878	-0.754486	-0.096365	0.0537848	-0.636839	-0.146346		-0.60396	-0.09348	-0.2989	-0.60909	-0.29079	0.054176	0.062655	-0.32277	-0.48954	-0.10016	0.075184	0.199031		0.257301	0.473123	0.084999	-0.49635	-0.27443	-0.08563	-0.21338	-0.21795	-0.18755	-0.07051
	-0.707053	-0.690035	0.0135342	-0.798709	-0.394534	-0.459546	-0.185027	0.0245397	0.0105947	0.15182	-0.343303	1.21287		-0.077714	0.389937	0.152974	-0.828897	0.858555	-0.475943	0.280649	-0.738549	-0.238845	-0.094078	-0.621148	0.0914794		-0.36581	-0.30147	-0.15628	-0.7846	-0.33976	-0.07251	-0.09447	-0.451	-0.2671	-0.08704	-0.03236	-0.04369		0.160684	0.398147	-0.35652	-0.33708	-0.4263	-0.15995	-0.19355	-0.18065	-0.01094	0.096893
	-0.575055	-0.527571	0.159131	-0.767808	-0.27097	-0.959226	-0.206755	0.178444	-0.172365	-0.188211	-0.396744	1.05647		-0.236681	0.677151	0.394403	-0.882292	0.556414	-0.603597	0.183236	-0.953482	0.201998	0.143674	-0.914821	0.228689		-0.42221	-0.37597	-0.234	-0.77218	-0.19194	0.01909	-0.09589	-0.39619	-0.32644	-0.01478	-0.03519	-0.15213		0.127377	0.366096	-0.17079	-0.43265	-0.49489	-0.01096	-0.24632	-0.38282	0.063452	0.024815
	-0.61848	-0.427833	-0.02384	-0.759257	-0.287451	-0.708989	-0.053608	0.102434	-0.125555	0.117872	-0.283285	1.27227		-0.300398	0.711154	0.27862	-0.646542	1.07887	-0.523541	0.216258	-0.765706	-0.473991	-0.002684	-0.404731	-0.249551		-0.54948	-0.17627	-0.46603	-0.79946	-0.22835	0.313287	-0.19523	-0.38457	-0.51946	-0.0732	-0.13015	0.159573		0.108312	0.260715	-0.25785	-0.43541	-0.36714	-0.01331	-0.14941	-0.40188	0.111533	-0.02675
	-0.688064	-0.574734	-0.040673	-0.530631	-0.209175	-1.09489	-0.146512	0.268026	-0.199079	0.0916364	-0.51823	0.768461		-0.309885	0.850082	-0.164536	-0.590098	0.665494	-0.665346	0.361312	-0.598301	-0.246118	0.165362	-0.672916	-0.169668		-0.59316	-0.25444	-0.30432	-0.77716	-0.25474	0.104124	-0.09444	-0.39448	-0.4387	0.070843	-0.15135	0.248088		0.023738	0.25724	0.056915	-0.55558	-0.49514	-0.12401	-0.07135	-0.38364	0.091305	0.049255
	-0.420003	-0.415842	-0.310072	-0.654006	-0.198227	-0.873048	-0.002298	0.127373	0.280219	0.173459	-0.508548	1.43553		-0.291407	0.726434	0.20557	-1.06987	0.741695	-0.635961	0.176386	-0.461354	-0.435326	-0.059959	-1.06913	-0.054861		-0.64449	-0.10304	-0.1382	-0.748	-0.36312	-0.00987	-0.21782	-0.37893	-0.39253	0.096512	-0.08	0.415502		0.005888	0.14385	-0.31689	-0.23267	-0.30146	-0.05476	-0.04375	-0.38581	0.113977	-0.13404
	-0.31942	-0.246276	-0.319596	-0.346778	-0.103139	-1.35319	0.0812965	-0.065531	-0.141432	0.18233	-0.312865	1.64027		-0.365127	0.662941	0.143079	-0.472009	0.799582	-0.956896	0.219465	-0.689712	-0.396648	0.170135	-1.21292	-0.178174		-0.61143	-0.0766	-0.38166	-0.75982	-0.32054	0.023443	-0.16436	-0.46191	-0.54399	0.059105	0.031745	0.242904		0.134799	0.066129	-0.19271	-0.25104	-0.28156	-0.06906	0.00312	-0.34561	-0.09637	-0.00807
	-0.273894	-0.629104	0.127314	-0.52174	0.312824	-0.750714	0.0446513	-0.06825	0.369203	0.184996	-0.17047	1.39933		-0.240714	0.46767	0.291071	-0.745227	0.487231	-0.64603	0.159543	-0.390596	-0.512081	0.16951	-1.01803	-0.458589		-0.71674	0.242057	-0.10659	-0.68446	-0.41644	0.315672	-0.24016	-0.15723	-0.42792	0.205677	0.032053	-0.07215		-0.00194	0.233064	0.060943	-0.43229	-0.3502	0.124513	-0.03808	-0.36281	0.338546	0.04765
	-0.140019	-0.293896	-0.393756	-0.433104	-0.123952	-1.16722	0.0480891	-0.022913	0.30879	0.158435	-0.225487	1.14611		-0.236271	0.373305	0.349984	-0.679277	0.223788	-0.617113	0.0308727	-0.365891	-0.390839	0.402309	-0.868435	-0.448308		-0.56513	-0.01763	-0.521	-0.81274	-0.10471	0.202644	-0.27329	-0.08194	-0.457	0.014386	0.281672	-0.1846		0.093023	-0.02784	-0.2012	-0.52541	-0.28999	-0.19491	0.022893	-0.22547	0.220104	0.017682
	-0.125061	-0.258253	-0.088087	-0.489709	-0.041139	-1.07841	-0.054037	0.0927214	0.0313614	-0.13447	-0.311174	0.814611		-0.279634	0.213762	0.809954	-0.892135	0.61469	-0.514593	0.176246	-0.573925	0.14323	0.385698	-0.788531	-0.368446		-0.47715	-0.1331	-0.2113	-0.93205	0.102298	0.355161	-0.32915	-0.21893	-0.58273	0.046077	-0.02633	-0.31641		0.003751	-0.14067	-0.04848	-0.34019	-0.43509	-0.13946	0.006571	-0.44195	-0.18029	0.056716
	-0.198171	-0.418259	-0.111498	-0.286713	-0.048187	-1.18718	0.028799	0.217186	-0.125894	-0.088974	-0.414938	1.04947		-0.22498	0.513305	0.856747	-0.707542	0.472467	-0.638584	0.0548354	0.122079	0.270882	0.424534	-0.731646	-0.142166		-0.44767	-0.03574	-0.14853	-0.80539	0.070029	0.289316	-0.20608	-0.07014	-0.23804	0.212419	0.103986	-0.23476		-0.00897	0.066457	-0.17303	-0.54913	-0.47834	0.030035	-0.0102	-0.23832	0.128338	0.23802
	-0.020725	-0.566215	-0.096354	-0.409494	0.115384	-0.766844	-0.070532	0.321223	-0.214468	-0.049507	-0.353087	0.58803		-0.060553	0.256833	0.831097	-0.7823	0.490249	-0.519925	0.232073	-0.220861	0.449702	0.128942	-0.403868	-0.112799		-0.50903	-0.18353	-0.07963	-0.96119	0.064146	0.358977	-0.27985	-0.17138	-0.15754	0.115687	0.084993	-0.38662		0.011574	0.080247	0.24575	-0.53827	-0.57988	-0.19217	-0.16932	-0.11275	0.05531	0.093529
	0.0243442	-0.551311	-0.155269	-0.523192	0.0697451	-0.915518	0.172254	0.141554	-0.484261	0.0208054	-0.475386	0.641421		0.0584347	-0.017394	0.526182	-0.574688	0.54047	-0.85181	0.60591	-0.659081	0.348291	-0.052712	-1.04004	-0.719148		-0.46345	-0.3668	-0.06317	-0.79244	0.040153	0.127719	-0.32995	-0.09852	-0.44241	-0.0429	0.05876	-0.12898		0.04097	0.228473	-0.04992	-0.30352	-0.54072	-0.02486	-0.10583	-0.07634	0.129231	-0.0814
	-0.038406	-0.581156	0.0810612	-0.556032	-0.000716	-0.765616	0.0454935	-0.013112	-0.610427	0.0514446	-0.350957	0.253293		0.0175474	0.101064	0.941472	-0.603423	0.512596	-0.590206	0.555481	-0.523343	0.187001	0.0574062	-0.76	-0.016738		-0.42983	-0.24194	0.006719	-0.87289	-0.03637	0.049975	-0.27679	-0.00968	-0.31969	0.163059	0.372284	0.21158		0.044993	0.049617	0.12892	-0.50664	-0.57436	-0.07573	-0.05797	-0.06657	-0.08496	-0.13653
	-0.081427	-0.495653	-0.424516	-0.671201	-0.178014	-0.424268	-0.010267	0.222513	-0.409786	-0.175269	-0.221824	0.458643		-0.040126	-0.168385	0.853482	-1.00534	0.828611	-0.903999	0.358437	-0.749036	-0.021149	0.179291	-0.806458	-0.1432		-0.49945	-0.03506	-0.35515	-0.96832	-0.07776	0.461538	-0.30141	-0.11808	-0.26407	0.284533	0.383923	-0.35733		0.074855	-0.05008	-0.21638	-0.50673	-0.49725	-0.29629	0.002643	-0.13251	0.400196	-0.30987
	-0.133096	-0.645929	-0.484868	-0.598716	-0.346347	-0.585976	-0.1168	0.149851	-0.19111	-0.028365	-0.105445	0.701106		-0.100842	-0.251307	0.78004	-0.86999	0.758702	-0.123009	0.233301	-0.285895	0.150407	0.117064	-0.93879	-0.323933		-0.51037	-0.11718	-0.2906	-0.77075	-0.17051	0.303264	-0.25635	-0.28164	-0.27087	0.236358	0.384756	-0.25002		-0.06937	-0.01538	-0.11508	-0.54487	-0.37116	-0.25969	-0.10558	-0.17157	0.323857	-0.35993
	-0.363925	-0.512368	-0.333683	-0.827893	-0.045602	-0.636669	0.059568	0.330097	-0.808973	-0.07412	-0.506709	0.164677		-0.103732	-0.291845	0.277911	-0.959058	0.902721	-0.674257	0.279932	-0.421096	-0.087205	0.290723	-1.06317	-0.051162		-0.5793	0.070434	-0.36727	-0.8916	-0.03641	0.087156	-0.24566	-0.38499	-0.41975	0.280633	0.361782	0.053242		-0.10004	-0.00581	-0.11984	-0.68622	-0.35699	-0.21546	-0.2033	-0.08146	-0.1132	-0.21179
	-0.357724	-0.285749	-0.440093	-0.320246	0.381413	-0.777423	-0.055949	0.299465	-0.378045	0.0755577	-0.63758	0.40323		-0.100827	-0.323338	0.152357	-0.705621	0.353315	-0.52714	0.251629	-0.70624	0.167062	0.355717	-0.946648	0.0467978		-0.57614	-0.01969	-0.3593	-0.73362	-0.11184	-0.05816	-0.30586	-0.34884	-0.34248	0.236185	0.419203	-0.41125		-0.12231	0.306501	0.02877	-0.62371	-0.19394	-0.24105	-0.09882	-0.17917	0.194976	-0.25362
	-0.404728	-0.451426	-0.100618	-0.351024	0.735846	-1.15629	-0.155166	0.107987	-0.000896	-0.043129	-0.42728	-0.044096		-0.152684	-0.277525	0.472051	-1.01677	0.0769348	-0.729851	0.162615	-0.919783	0.108158	0.184448	-0.654412	-0.084378		-0.64023	0.099273	-0.65467	-0.72146	-0.27183	0.54638	-0.38246	-0.14704	-0.28784	0.173569	0.314786	-0.22326		-0.02949	0.253167	-0.06852	-0.62815	-0.02946	-0.2977	-0.01548	-0.26051	0.240068	-0.13003
	-0.494798	-0.425268	0.105824	-0.767582	1.71824	-1.29996	-0.08542	0.179482	-0.11595	-0.115357	-0.603104	-0.037797		-0.136369	-0.617255	0.354872	-1.05419	0.431156	-0.26764	0.151604	-0.494571	0.174703	0.382009	-1.06086	-0.167502		-0.68292	0.135683	-0.44616	-0.83653	-0.22829	0.045779	-0.30276	-0.27699	-0.15561	0.03781	0.371143	-0.18987		0.05176	0.362816	-0.32249	-0.53673	-0.11533	-0.27795	0.081982	-0.15071	0.202735	-0.01975
	-0.557574	-0.674429	0.0206123	-0.609959	1.6226	-0.670429	0.0068711	0.326979	-0.143264	-0.143186	-0.430999	0.295602		-0.150485	-0.572392	0.460074	-0.828848	0.48193	0.284683	0.446629	-0.842652	0.326238	0.216055	-0.829327	0.005719		-0.72856	0.034865	-0.28714	-0.7968	-0.35	0.30657	-0.32786	-0.05059	-0.49391	0.088258	0.104545	-0.17296		-0.01224	0.353259	-0.34887	-0.35044	-0.26208	-0.2601	0.206894	-0.0761	0.312858	-0.04607
	-0.702881	-0.784246	-0.204045	-0.637875	1.20281	-0.301612	-0.082814	0.493331	-0.260666	-0.304403	-0.376123	0.354985		-0.140616	-0.137883	0.447917	-0.92307	1.0175	-0.160513	0.407436	-0.301764	0.0603956	0.195156	-0.965715	0.0242146		-0.72819	-0.11242	-0.20836	-0.91054	-0.52492	-0.16657	-0.32491	-0.13142	-0.40737	0.081797	0.115889	0.195995		0.003615	0.464731	-0.17351	-0.46397	-0.13466	0.07609	0.225259	-0.06888	0.229029	0.082541
	-0.568746	-0.758538	-0.356873	-0.787229	0.758369	-0.723545	-0.011004	0.193361	-0.374211	-0.148803	-0.195328	0.432489		-0.048367	-0.161237	0.490715	-0.729265	0.720019	-0.265964	0.498293	-0.736191	0.0618563	0.34384	-1.30988	-0.049672		-0.70094	-0.05985	-0.13699	-0.89016	-0.63957	-0.13362	-0.13606	-0.04744	-0.44474	0.163075	-0.03595	0.391741		0.037687	0.494152	-0.15402	-0.75719	-0.26544	-0.0598	0.257624	-0.04718	0.220166	0.112413
	-0.533028	-0.416374	0.0432986	-0.517083	0.451097	-0.6303	-0.10242	0.356985	-0.044892	-0.207627	-0.421908	0.860126		-0.178314	-0.10654	0.432105	-0.611775	0.825324	-0.327546	0.475189	-1.05054	-0.24481	0.0009519	-1.0243	-0.010917		-0.81351	-0.11162	-0.73399	-0.77097	-0.64516	-0.11363	-0.2836	-0.09989	-0.40996	0.00278	-0.16282	-0.17992		-0.08788	0.552649	-0.34524	-0.47377	-0.19538	-0.04979	0.253229	-0.22573	0.170079	0.210011
	-0.470784	-0.459591	-0.271843	-0.733862	0.376304	-1.21845	-0.026391	0.396148	-0.273103	-0.101703	-0.26531	0.566171		-0.213979	-0.210772	-0.167809	-0.834604	0.581636	-0.890909	0.439324	-0.438106	-0.483296	-0.032544	-0.852904	0.0135102		-0.86249	-0.12089	-0.48303	-0.76248	-0.56063	-0.3024	-0.30282	0.041802	-0.63427	0.204427	-0.16425	-0.16041		-0.07503	0.516369	-0.26625	-0.65334	-0.2186	0.008741	0.119466	-0.21821	0.235163	0.392731
	-0.316406	-0.508527	0.0526842	-0.534264	0.0590096	-0.998317	-0.147299	0.445506	0.0207198	-0.242874	-0.159605	0.764571		-0.346528	-0.275797	-0.225356	-0.935083	0.561196	-0.597207	0.336502	-0.755058	-0.101184	0.240633	-0.740417	0.0128002		-0.83804	-0.08626	-0.55101	-0.63437	-0.57182	-0.00482	-0.09586	-0.03495	-0.49395	0.131286	0.019827	-0.11865		0.04718	0.376289	-0.22632	-0.64098	-0.36515	-0.17681	0.147027	-0.2332	0.236814	0.15691
	-0.296233	-0.38092	-0.328783	-0.588365	0.240762	-0.980935	-0.070437	0.359304	0.0334834	0.110865	0.0056552	0.566526		-0.233259	-0.288216	0.364729	-0.847149	0.731906	-0.830803	0.26919	-0.843477	-0.207483	0.226392	-1.20522	0.2084		-0.90826	0.034346	-0.52833	-0.67012	-0.55706	0.45869	0.00188	-0.12259	-0.22933	0.018054	0.120018	-0.26284		0.035941	0.344791	-0.35295	-0.54027	-0.22632	-0.42441	0.136198	-0.24295	0.045161	0.302047
	-0.444117	-0.319832	-0.204922	-0.946954	0.165938	-0.928372	-0.147446	0.121734	-0.043353	0.0190464	-0.033266	0.760823		-0.179116	-0.442572	0.11564	-1.04553	0.677281	-0.664794	0.187703	-0.656282	-0.469203	-0.012856	-1.08348	-0.389455		-0.82597	-0.03231	-0.38991	-0.6977	-0.56012	0.333302	-0.01364	-0.11309	0.101982	0.08102	-0.05762	0.00608		-0.01047	0.411744	-0.06604	-0.68392	-0.27103	-0.33343	0.300865	-0.1192	0.307339	0.231885
	-0.497269	-0.478875	0.176558	-0.796302	0.258202	-0.587098	-0.064296	0.23303	-0.177486	0.161491	-0.048493	0.941433		-0.214224	0.112442	0.0296731	-1.27827	0.756185	-0.363911	0.138708	-0.852309	-0.209416	0.10631	-0.99649	0.037494		-0.7623	0.019251	-0.36084	-0.6662	-0.39415	0.307874	-0.06306	-0.08566	0.078993	0.233557	0.04825	0.138139		0.015624	0.390013	-0.24152	-0.76683	-0.28301	0.0087	0.379254	-0.31433	0.412704	0.374329
	-0.433702	-0.355418	-0.143929	-0.742502	-0.116617	-0.30961	-0.159828	0.340132	-0.053231	0.209124	-0.358198	0.0996265		-0.132152	-0.148479	-0.036351	-1.13486	0.502095	-0.693127	0.194021	-0.743148	-0.522043	0.309045	-1.01796	-0.047185		-0.84699	-0.25926	-0.3205	-0.61523	-0.39938	-0.25345	0.052118	0.029915	0.00879	0.206182	0.188065	-0.09038		0.05141	0.329542	-0.34216	-0.46696	-0.36754	-0.27118	0.282778	-0.23045	-0.07265	0.340001
	-0.536597	-0.241308	-0.302566	-0.934208	0.0288714	-1.01805	0.029368	0.747678	-0.263871	0.105734	-0.030112	0.937399		-0.103314	-0.292655	0.474637	-0.91364	0.428903	-0.772349	0.234123	-0.778605	-0.55451	0.299984	-0.851448	0.5336		-0.77844	-0.45112	-0.42651	-0.56081	-0.35716	-0.14699	-0.15513	-0.0522	-0.28018	0.095715	0.173621	0.004738		-0.02849	0.371373	0.003478	-0.39756	-0.44149	-0.03104	0.254372	-0.17189	-0.06095	0.052671
	-0.619198	0.189735	0.307	-1.02646	0.182027	-1.01341	-0.073262	0.517953	-0.618446	0.141881	-0.368887	1.05974		-0.048332	-0.082963	0.527847	-1.02767	0.651995	-0.781033	0.151407	-0.55606	-0.275841	0.0186153	-1.41313	1.13083		-0.79511	-0.53866	-0.25112	-0.48602	-0.40116	0.034155	-0.18629	-0.12671	-0.32415	-0.08996	0.201706	-0.16747		0.009856	0.366855	0.104415	-0.12667	-0.36341	-0.07227	0.28002	-0.25337	-0.14008	-0.16541
	-0.625468	-0.063557	-0.123026	-0.917707	0.239643	-0.777285	0.0119586	0.818401	0.254158	0.218658	-0.390298	1.03576		-0.196197	-0.047115	1.08367	-0.966632	0.481183	-0.421157	0.13473	-0.745761	-0.480636	0.0322872	-0.882932	0.377038		-0.88154	-0.33606	-0.37668	-0.45671	-0.46382	0.131102	-0.02613	-0.03164	-0.36907	-0.05012	0.234415	-0.24307		0.337741	0.593925	0.394425	-0.03937	-0.46533	-0.0255	0.259621	-0.27494	-0.00167	-0.22219
	-0.706589	-0.112761	0.168695	-0.830877	0.316897	-0.685227	-0.011347	0.538372	-0.427414	-0.134638	-0.273664	0.857308		-0.237711	-0.265176	0.568879	-1.19548	0.410148	-0.382429	0.0963644	-0.641394	-0.426924	0.193028	-1.06949	0.276429		-0.72297	-0.3204	-0.47586	-0.49135	-0.51508	0.019704	-0.08457	-0.02059	-0.3063	-0.06665	0.268796	-0.05908		0.405378	0.443146	0.241227	-0.08597	-0.52623	-0.2424	0.151818	-0.11428	-0.14188	-0.20477
	-0.713848	-0.11599	0.295787	-1.01682	0.517933	-1.26627	-0.009695	0.767353	-0.47881	0.0382963	-0.386272	0.841334		-0.25457	-0.36108	0.760588	-1.08041	0.459226	-0.697175	0.0763013	-0.810041	-0.547976	0.475651	-0.912219	0.409193		-0.76969	-0.17556	-0.49653	-0.46034	-0.43027	-0.0949	-0.16813	-0.3589	-0.61374	0.007449	0.224657	-0.11318		0.440821	0.539602	-0.07988	-0.25676	-0.35292	-0.26534	0.131253	-0.3389	0.235209	-0.26065
	-0.64611	-0.446033	0.198577	-0.986105	0.514801	-0.971521	0.224906	0.441767	-0.106835	0.0688784	-0.260956	0.688533		-0.123586	-0.268592	0.41018	-0.701027	0.263839	-0.529319	0.0898936	-0.78229	-0.280857	-0.108956	-0.907568	0.108683		-0.8606	-0.0236	-0.4013	-0.62178	-0.41636	0.083662	-0.29389	-0.17729	-0.63634	-0.04231	0.06808	-0.10592		0.341828	0.49853	0.036542	-0.25044	-0.38136	-0.36581	0.120982	-0.1362	0.039275	-0.0376
	-0.463031	-0.556455	-0.111733	-0.923123	0.235654	-0.916665	0.353501	0.502718	-0.405332	0.368843	-0.479572	0.827612		-0.221517	-0.229884	0.320398	-0.572813	0.646613	-0.448512	0.107137	-0.401722	-0.33348	0.217956	-0.929615	0.0097825		-0.8097	0.063674	-0.44006	-0.46316	-0.30223	0.223207	-0.17206	-0.17046	-0.56279	-0.09098	0.231128	-0.18134		0.364673	0.605199	0.508839	-0.24911	-0.39308	-0.25252	0.100252	-0.14988	0.000819	-0.07654
	-0.523543	-0.513514	0.0936373	-1.01402	0.0578637	-0.789605	0.560616	0.78753	-0.391143	-0.156693	0.073337	0.726976		-0.16053	-0.426821	0.396124	-1.14641	0.556607	-0.685965	0.0667144	-0.741791	-0.685564	0.122363	-1.00013	0.0241683		-0.89913	0.349697	-0.615	-0.4993	-0.30111	0.451529	-0.08407	-0.16165	-0.3857	0.043785	0.105284	-0.20924		0.37343	0.609959	0.643037	-0.14072	-0.3111	-0.03618	0.061907	-0.11711	-0.07712	-0.06629
	-0.499414	-0.660685	0.0629932	-0.860974	-0.143597	-0.85687	0.513312	0.471684	-0.060285	-0.057817	0.147254	1.1471		-0.127066	-0.180859	0.350308	-1.10589	0.589455	-0.266228	0.302614	-0.659927	-0.281261	0.417429	-0.968346	0.201166		-0.97842	0.086775	-0.34486	-0.59758	-0.29792	0.240805	-0.31093	-0.14942	-0.46382	0.052463	0.407395	-0.42889		0.447827	0.558781	0.60144	-0.11884	-0.39033	-0.39395	0.034906	-0.10699	-0.04234	-0.01164
	-0.408207	-0.608364	0.0367052	-1.14295	0.078776	-0.985741	0.454895	0.124412	-0.341182	-0.302814	0.0365356	0.762126		-0.234327	-0.409579	0.228863	-1.00479	0.469448	-0.453051	0.415995	-0.74875	-0.423338	0.388551	-0.611915	0.0974538		-0.93963	-0.12067	-0.62065	-0.69125	-0.2468	-0.03456	-0.11057	0.106421	-0.24623	0.17625	0.317845	0.000972		0.482303	0.610181	0.424308	-0.07146	-0.37179	-0.23393	-0.01679	-0.11897	-0.18733	0.009193
	-0.495546	-0.412237	0.564754	-0.993933	0.154401	-1.0369	0.248117	0.344191	-0.320925	0.0039344	-0.129146	0.729602		-0.238451	-0.307664	0.0639212	-1.29057	0.894335	-0.400359	0.287898	-0.747943	-0.690133	0.227372	-1.07101	0.102295		-0.88489	-0.14243	-0.41812	-0.59491	-0.3958	-0.21237	0.039495	-0.08637	-0.32664	0.040594	0.133429	0.279703		0.445657	0.502517	0.151905	0.08545	-0.46784	-0.14529	-0.05045	-0.12521	-0.04227	0.104779
	-0.29389	-0.678852	0.265302	-0.763729	0.505366	-0.940076	0.120537	0.348248	-0.120527	0.0742384	-0.019316	0.329045		-0.102413	-0.422789	0.212757	-0.722457	0.334076	-0.399929	0.351792	-0.736418	-0.529542	0.406354	-0.657236	0.164443		-0.74566	-0.3006	-0.37364	-0.76663	-0.27127	-0.06619	0.162186	-0.18802	-0.52859	0.093304	0.354701	0.547726		0.431409	0.491582	0.352966	-0.13618	-0.47047	-0.17338	-0.0565	-0.10391	0.01411	0.139648
	-0.331502	-0.602196	0.0462553	-1.06346	0.762719	-1.38991	0.0943781	0.185334	-0.318639	-0.180542	-0.137512	0.765359		-0.213943	-0.533577	0.195163	-1.0106	0.524915	-0.453593	0.196143	-0.759417	-0.628153	0.752402	-0.981721	0.146714		-0.8202	-0.24135	-0.18006	-0.64734	-0.19597	-0.02717	0.221279	-0.03948	-0.31733	0.173647	0.425262	0.309436		0.732046	0.467789	0.139992	0.000409	-0.44485	0.004206	-0.06612	0.079906	-0.12105	0.05759
	-0.340949	-0.509624	0.544404	-1.04268	1.06887	-1.15295	0.0649611	-0.173216	-0.133446	-0.285817	-0.218197	0.197838		-0.177611	-0.150748	0.263089	-0.790023	0.357127	-0.91957	0.229583	-0.988536	-0.786547	0.710361	-0.617907	-0.059187		-0.73296	-0.48939	0.032729	-0.67978	-0.18026	0.103964	0.041443	-0.10228	-0.52768	0.150616	0.381124	0.507999		0.69917	0.598932	0.080401	-0.106	-0.5812	-0.15305	-0.13476	-0.01789	-0.03303	0.049737
	-0.488189	-0.175096	0.501944	-1.26476	0.804364	-1.0377	0.0119032	-0.127555	-0.000117	-0.243482	-0.154954	0.357757		-0.233489	-0.459376	0.180306	-0.983019	0.408116	-0.628274	0.277054	-0.823388	-0.612737	0.717842	-0.674706	0.185178		-0.74435	-0.44985	-0.45492	-0.91813	-0.29036	0.015791	-0.02184	-0.17814	-0.54623	0.157608	0.352241	0.01968		0.722809	0.503995	0.195777	-0.02804	-0.56545	-0.37852	-0.08676	-0.10847	0.0501	0.158143
	-0.312752	-0.224121	1.1777	-0.705925	0.3565	-1.03201	0.0572345	-0.284991	0.0629927	-0.004102	-0.19777	0.732854		-0.16992	-0.34767	0.191873	-0.547263	0.246903	-0.71417	-0.000125	-0.880459	-0.66835	0.683367	-1.27422	-0.037515		-0.71873	-0.41005	-0.03608	-0.78139	-0.24179	0.10759	-0.00981	-0.29763	-0.66954	0.358027	0.43345	-0.1578		0.74957	0.38311	0.49701	-0.23512	-0.67191	0.100792	-0.13081	-0.27689	-0.18292	0.138786
	-0.459083	-0.497466	1.01914	-0.67654	0.218316	-0.952213	0.0412896	-0.25575	-0.391747	0.442161	-0.314	0.888464		0.271334	-0.291777	0.307522	-0.479519	0.359351	-0.481196	0.0777789	-0.796119	-0.295146	0.433122	-1.08316	-0.05507		-0.8477	-0.46274	-0.21159	-0.86255	-0.06317	0.381038	-0.05388	-0.32014	-0.38172	0.096405	0.436403	-0.03619		0.717145	0.545111	0.328057	-0.0933	-0.40976	-0.16794	-0.0544	-0.3982	-0.28407	0.040774
	-0.377774	-0.570662	0.491038	-0.783367	0.190624	-0.588789	0.0228053	0.0612989	-0.19007	0.266928	-0.310008	0.954137		0.954791	-0.219582	-0.060112	-0.813997	0.100785	-0.983231	0.16869	-0.411248	-0.311333	0.434005	-0.47659	0.392186		-0.88641	-0.39314	-0.03973	-0.9803	-0.44805	0.1089	-0.14095	-0.08733	-0.21087	-0.12158	0.430887	0.095191		0.859465	0.393003	0.430428	-0.09226	-0.36608	0.060701	0.16792	-0.26062	-0.24405	0.194507
	-0.487721	-0.566916	0.960571	-0.691944	-0.175515	-0.776407	0.148324	-0.147161	-0.422621	0.535832	-0.424239	1.00214		1.14597	-0.667176	0.308703	-0.817354	0.418102	-0.270814	0.250713	-0.474644	-0.258502	0.199096	-0.554941	0.696891		-0.9149	-0.39366	-0.50567	-0.87158	-0.47338	0.290027	-0.15771	-0.16527	-0.56723	0.135715	0.257136	0.352457		0.735282	0.455121	0.492388	-0.08567	-0.3903	0.15247	0.144128	-0.25412	-0.18653	0.156585
	-0.547393	-0.556284	0.484834	-0.264257	-0.063674	-0.163739	0.142839	0.0176974	-0.373663	0.308452	-0.291703	1.28574		1.27659	-0.397047	0.0633797	-0.653865	0.0786984	-0.649386	0.0620531	-0.607373	-0.643686	0.206574	-0.339712	0.51021		-0.72778	-0.39486	-0.25623	-0.90458	-0.38858	-0.02879	-0.03767	-0.34417	-0.47587	0.091868	0.162424	0.108638		0.72738	0.535411	0.512858	0.078854	-0.4336	0.078233	0.267096	-0.39113	-0.12147	0.100373
	-0.628035	-0.640243	0.45288	-0.675794	-0.207728	-0.373609	0.199597	-0.191965	-0.162146	0.430673	-0.404693	0.744622		1.004	-0.263338	0.153004	-0.706579	-0.125754	-0.351538	-0.035584	-0.121091	-0.738755	0.39414	0.0429806	0.393081		-0.79349	-0.15881	-0.49087	-0.83301	-0.42739	0.091056	-0.05709	-0.33879	-0.4833	0.256095	0.158449	0.350191		0.798735	0.423432	0.611009	0.279078	-0.31549	0.062306	0.243023	-0.3726	-0.27185	0.061562
	-0.69493	-0.674007	0.176209	-0.825365	-0.227835	-0.895725	0.176406	-0.194092	-0.547945	0.156804	-0.637948	0.841007		0.859889	-0.156788	-0.097261	-1.01046	0.146174	-0.439259	-0.065854	-0.384597	-0.712269	0.222717	-0.707216	0.294165		-0.76395	-0.41011	-0.37817	-0.79461	-0.46214	-0.07479	-0.17209	-0.44059	-0.47803	0.08486	0.194117	0.260832		0.579923	0.373565	0.766554	0.194958	-0.31113	0.032546	0.253836	-0.20428	-0.18997	0.063881
	-0.523748	-0.655199	-0.085624	-1.02889	0.211145	-1.17961	0.221431	-0.117707	-0.146402	0.06236	-0.599482	0.601605		0.626333	-0.611008	0.163539	-0.784751	0.28315	-0.559143	-0.035677	-0.456191	-0.197215	0.172936	-0.757736	0.575018		-0.77643	-0.27163	-0.37435	-0.85754	-0.38334	0.009461	-0.04255	-0.44183	-0.23687	0.012406	0.244595	-0.05506		0.522966	0.485863	0.71618	0.230558	-0.34963	-0.06496	0.213741	-0.18651	-0.0997	0.10351
	-0.690157	-0.53821	-0.076364	-0.808873	0.0443972	-0.678743	0.288138	0.0482051	-0.142748	-0.167234	-0.287678	0.594823		0.401336	-0.706777	0.571388	-0.991659	0.0639475	-0.577068	-0.018316	-0.267667	-0.796399	0.0898991	-0.346578	0.52273		-0.68188	-0.42759	-0.0567	-0.69255	-0.25104	-0.0494	-0.21413	-0.46768	-0.41785	-0.09414	0.32363	-0.22114		0.45754	0.513114	0.68959	-0.13179	-0.29739	0.172192	0.207674	-0.36088	0.086289	-0.06237
	-0.787067	-0.35243	-0.27864	-0.822255	0.0137975	-0.764775	0.310464	0.169414	-0.205593	-0.252557	-0.121578	0.606624		0.252937	-0.510059	0.573833	-1.0344	0.0178761	-0.683396	-0.059117	-0.590651	-0.582138	0.348414	-0.406354	0.878397		-0.69493	-0.4637	-0.0516	-0.78292	-0.29878	0.10725	-0.13084	-0.23457	-0.29254	-0.30891	0.295762	-0.35585		0.441683	0.690256	0.761354	-0.09525	-0.10403	0.206994	0.249637	-0.30786	-0.12965	-0.1801
	-0.852355	-0.27099	-0.055318	-0.68777	-0.03524	-1.1589	0.219226	0.103905	0.0021022	-0.058913	0.0736934	0.808214		0.315539	-0.471641	1.02224	-0.760134	0.0460017	-0.80417	0.100432	-0.378677	-0.626919	0.0130585	-0.43536	0.598669		-0.69156	-0.44517	-0.34457	-0.65298	-0.39428	0.21896	-0.25781	-0.31187	-0.19945	-0.22629	0.202292	-0.39953		0.321946	0.776211	0.326025	0.193193	-0.1518	0.163942	0.200595	-0.2044	-0.1394	-0.30921
	-0.834722	-0.448509	0.197404	-0.374006	-0.051745	-0.734734	0.20083	0.290632	-0.046814	-0.522938	-0.157309	0.601623		0.112682	-0.331136	0.631401	-0.226756	0.198823	-0.357412	-0.154481	-0.375511	-0.740318	0.183688	-0.801882	0.101987		-0.80417	-0.53605	-0.54176	-0.60317	-0.55944	0.329817	-0.34982	-0.47431	-0.32826	-0.27599	0.21702	-0.23457		0.38354	0.647243	0.326297	-0.06191	-0.19535	-0.03853	0.202176	-0.19047	0.251541	-0.32508
	-0.702385	-0.642974	-0.021008	-0.705215	0.0105645	-0.960398	0.0876542	0.138228	0.342493	-0.403719	0.201982	0.619637		0.0377724	-0.567505	0.836904	-0.479176	0.277793	-0.169864	-0.083702	-0.418419	-0.309683	-0.121762	-0.475274	0.762634		-0.8341	-0.62847	-0.6007	-0.87797	-0.57098	-0.12352	-0.15411	-0.50407	0.093331	-0.28689	0.163511	-0.31775		0.503245	0.672193	0.467651	0.133806	-0.24245	-0.0309	0.304026	-0.01708	0.070797	-0.14155
	-0.75024	-0.584209	-0.099591	-0.549345	-0.356172	-0.875093	-0.0328	0.0366808	0.339347	-0.434501	-0.353485	0.467286		0.0477994	-0.349061	0.714134	-0.516042	0.20932	-0.188177	0.0133281	-0.635044	-0.213666	-0.16243	-0.666062	0.636343		-0.83121	-0.16051	-0.31383	-0.88016	-0.71966	0.133338	-0.3183	-0.45302	-0.17111	-0.12433	0.023431	0.15267		0.521012	0.782425	0.67462	0.01326	-0.10764	-0.08748	0.256827	-0.07921	-0.006	-0.34332
	-0.668522	-0.644486	0.0203704	-0.65144	-0.333356	-0.804031	-0.053419	0.410741	-0.244442	-0.111134	-0.287226	0.705689		-0.010185	-0.631109	0.47345	-0.820468	0.38975	-0.181191	-0.10076	-0.465534	-0.005778	-0.044428	-0.602264	0.542663		-0.85426	-0.31597	-0.48238	-0.85036	-0.82252	-0.17956	-0.28995	-0.38484	0.110639	-0.20773	0.009621	0.068826		0.602993	0.463346	0.41116	-0.13415	-0.19232	0.161645	0.358186	-0.14582	-0.0446	-0.19001
	-0.655273	-0.097427	0.181736	-0.66903	-0.277304	-1.13098	-0.170144	0.217836	-0.024272	0.0077572	-0.194056	0.632207		-0.087036	-0.495403	0.684332	-0.654494	0.409059	-0.059163	-0.192799	-0.605458	-0.533084	0.0400331	-0.427727	0.449799		-0.90604	-0.43821	-0.34692	-0.79305	-0.67562	0.208537	-0.42461	-0.53975	-0.04509	-0.18245	0.040181	0.387042		0.46367	0.501374	0.468286	-0.30626	-0.1558	-0.12683	0.309417	-0.12329	0.069762	-0.0899
	-0.481604	-0.374856	0.344267	-0.565599	-0.234395	-0.971031	-0.143966	0.0894712	-0.008093	0.0188907	-0.048585	0.665782		0.0411859	-0.215566	0.29209	-0.754171	0.660333	-0.216404	-0.041569	-0.543077	-0.288523	0.173577	-0.827998	0.424845		-0.79964	-0.51651	-0.72996	-0.96132	-0.64709	0.2867	-0.32216	-0.3845	0.009151	-0.45835	0.042995	-0.28298		0.441948	0.539384	0.517558	-0.18073	-0.17079	0.134713	0.334239	-0.2311	0.136501	-0.02387
	-0.552258	-0.283385	0.518535	-0.759468	-0.614632	-1.08966	-0.129704	0.0012673	-0.294852	0.0301331	-0.087283	0.594767		-0.126368	-0.327495	0.139707	-0.679182	0.274498	-0.77219	-0.207124	-0.515295	-0.445055	-0.011453	-0.699178	0.487385		-0.76129	-0.26768	-0.50309	-0.79777	-0.56648	-0.29204	-0.20463	-0.27863	-0.19181	-0.3995	0.312549	0.003656		0.404138	0.388251	0.45201	-0.36041	-0.17547	-0.1398	0.227782	-0.25169	-0.05327	-0.02908
	-0.461277	-0.254024	0.705809	-0.755898	-0.317551	-1.07399	-0.121075	-0.008857	-0.385446	0.156581	0.0513954	0.384289		0.0238412	-0.412784	0.187787	-0.405688	0.597962	-0.315213	-0.006655	-0.869982	-0.624924	-0.352683	-0.996245	0.575631		-0.75862	-0.38009	-0.58657	-0.89606	-0.59341	0.042538	-0.3512	-0.41337	-0.24432	-0.30248	0.500037	-0.04244		0.189874	0.40048	0.573724	-0.30841	-0.11301	-0.02418	0.249198	-0.33507	0.135324	-0.22543
	-0.350297	-0.445776	0.444976	-0.560847	-0.274271	-0.54667	-0.119775	-0.065196	-0.422557	0.435812	0.154868	0.795937		-0.112516	-0.703586	0.1814	-0.400876	0.385009	-0.469004	-0.118747	-0.558556	-0.717305	-0.143756	-0.576417	0.700714		-0.78391	-0.4165	-0.48799	-1.10846	-0.44381	0.229485	-0.26081	-0.30535	-0.16421	-0.29904	0.447345	-0.23473		0.285313	0.484664	0.192613	-0.49129	-0.2824	-0.18743	0.136797	-0.27322	-0.08194	-0.10135
	-0.436702	-0.238292	0.607881	-0.696241	-0.406882	-0.797201	-0.08675	-0.26004	-0.523474	0.275641	-0.015712	0.510564		-0.052877	-0.297125	-0.053322	-0.732055	0.677754	-0.512946	-0.397731	-0.818973	-0.228746	-0.168788	-0.881865	0.241593		-0.61129	-0.36982	-0.46869	-0.96674	-0.44125	0.202347	-0.16897	-0.35508	-0.38264	-0.30283	0.318554	0.047231		0.315431	0.427702	0.640306	-0.4993	-0.43478	-0.16834	0.211117	-0.22591	-0.11346	-0.19428
	-0.53485	-0.031748	0.53342	-0.757177	-0.575659	-1.05783	0.095313	-0.168642	-0.486701	0.166539	-0.150469	0.663042		-0.10852	-0.57507	0.250541	-0.757102	0.365694	-0.827589	-0.284317	-0.73158	-0.264967	-0.454652	-0.894752	0.0753576		-0.64271	-0.60318	-0.35599	-1.00192	-0.73101	0.05793	-0.35981	-0.48644	-0.21404	-0.22782	0.469937	0.182568		0.229173	0.211889	0.94289	-0.40835	-0.31706	-0.21785	0.083212	-0.2702	-0.0536	-0.11651
	-0.300711	-0.215159	0.110338	-0.960487	-0.339031	-1.06613	0.46786	-0.159702	-0.478422	0.221826	-0.109384	0.758264		0.089061	-0.683963	-0.079901	-0.439189	0.518985	-0.565839	-0.406471	-0.582853	-0.449766	0.102459	-0.980107	-0.04395		-0.65442	-0.31877	-0.55859	-1.00418	-0.73231	-0.13539	-0.37793	-0.65387	-0.12286	-0.37936	0.359448	0.15129		0.17044	0.476043	0.760446	-0.25402	-0.26822	0.041561	0.120023	-0.26435	-0.03611	-0.07396
	-0.05889	-0.284767	-0.176526	-0.731923	-0.572915	-0.999276	0.561191	0.0272016	-0.186579	0.385889	-0.143384	0.620092		-0.030417	-0.361912	0.473295	-0.312926	0.544758	-1.03831	-0.354497	-0.529455	-0.81221	0.0351164	-0.798565	0.0995944		-0.68639	-0.25705	-0.50675	-0.91495	-0.67614	-0.10386	-0.26048	-0.40824	-0.48501	-0.1816	0.302233	-0.06881		0.325527	0.368139	1.04048	-0.49213	-0.28627	-0.1144	0.085881	-0.36072	0.172856	-0.09859
	-0.279798	-0.520453	0.517442	-1.11468	-0.380856	-0.74414	0.540395	0.0800499	-0.423165	0.303346	-0.081023	1.16143		0.0594143	0.166327	0.0642415	-0.175236	0.279963	-0.405096	-0.311847	-0.147848	-0.341052	-0.304978	-1.11705	0.188236		-0.71454	-0.23936	-0.5174	-0.93229	-0.82825	-0.31936	-0.3836	-0.41637	-0.18835	0.119279	0.317949	-0.41292		0.288213	0.441203	0.606513	-0.56809	-0.41867	-0.15295	0.171277	-0.30095	-0.01497	0.067721
	-0.340694	-0.474501	-0.007408	-0.791093	-0.265072	-0.713723	0.482355	0.189652	-0.70755	0.345266	-0.386497	0.938942		0.119311	-0.092596	0.495266	-0.472322	0.348491	-0.518362	-0.147365	-0.403587	-0.596257	-0.000518	-0.777239	0.35531		-0.82806	-0.16739	-0.41744	-0.68832	-0.65056	0.032103	-0.25455	-0.54084	-0.49468	-0.1185	0.196118	-0.56675		0.215528	0.29352	0.844649	-0.46019	-0.37435	-0.07829	0.131453	-0.35756	-0.10346	-0.15826
	-0.504316	-0.624267	-0.222563	-0.801866	-0.319123	-0.725125	0.559949	0.33414	-0.4548	0.289178	-0.098183	1.08346		0.19178	-0.475569	0.230156	-0.546109	0.522674	-0.466542	-0.147542	-0.251862	-0.380512	0.325483	-1.13157	0.468071		-0.73855	0.011404	-0.23464	-0.82144	-0.7023	-0.11029	-0.21591	-0.48958	-0.53769	0.172893	0.218407	-0.25916		0.251789	0.239965	0.834874	-0.25914	-0.22011	-0.11997	0.089449	-0.43276	-0.03288	-0.12335
	-0.566091	-0.635131	0.159959	-1.00456	0.16358	-1.56389	0.566805	0.210601	-0.43749	0.353802	-0.176568	1.01411		0.0282012	-0.460374	0.482137	-0.354	0.1407	-0.286711	-0.298469	-0.665262	-0.794158	-0.199004	-1.17584	0.0935346		-0.74356	-0.02408	-0.08833	-0.74972	-0.59086	-0.20006	-0.25693	-0.42642	-0.56527	0.001701	0.280038	0.019175		0.318759	0.271966	0.857201	-0.31842	-0.32538	-0.17143	0.343976	-0.47287	-0.0791	-0.04872
	-0.616946	-0.699463	-0.490966	-0.972922	0.251353	-0.767913	0.426605	0.188617	-0.424357	0.502586	0.152189	1.41062		0.0366236	-0.698644	0.419456	-0.626051	0.571655	-0.525321	-0.111932	-0.352881	-0.625136	-0.109039	-0.818987	0.548684		-0.74953	-0.23954	-0.37229	-0.76389	-0.68965	-0.34608	-0.32171	-0.5469	-0.33267	0.094527	0.517455	-0.30119		0.344609	0.121436	1.17604	-0.20542	-0.20369	-0.0555	0.267461	-0.16581	-0.24128	-0.28305
	-0.69246	-0.566907	0.134505	-0.860454	0.23587	-0.770882	0.446839	0.158016	-0.191048	0.413158	0.174502	1.19326		0.175	-0.600073	0.0965181	-0.115431	0.635296	-0.499875	-0.105887	-0.541199	-0.184825	-0.4561	-1.00517	0.442412		-0.76258	-0.18784	-0.07939	-0.76448	-0.5685	-0.19276	-0.21993	-0.34581	-0.28006	-0.01287	0.39459	-0.29541		0.418947	0.215703	0.833664	-0.31657	-0.01186	-0.16916	0.355808	-0.42521	-0.062	0.00392
	-0.78917	-0.643852	0.445356	-1.21731	-0.15306	-1.05079	0.337672	0.234177	0.257181	0.245956	0.0943433	0.995368		0.0938877	-0.315452	0.13023	-0.301877	0.502094	-0.606788	-0.122706	-0.8625	-0.715962	-0.261076	-0.643803	0.701143		-0.71358	-0.14417	-0.41096	-0.89422	-0.39662	-0.02217	-0.17306	-0.37852	-0.3397	-0.07036	0.26448	-0.01794		0.354108	0.179267	0.888881	-0.0931	-0.13044	-0.23817	0.399639	-0.42976	-0.38871	0.042174
	-0.693114	-0.484657	0.231317	-0.82727	-0.21578	-1.5082	0.313006	0.127022	-0.514604	0.192191	0.793529	0.54711		0.0845377	-0.81384	-0.044567	-0.152231	0.472177	-0.448565	-0.073478	-0.965177	-0.440402	-0.430762	-0.881779	0.546165		-0.75751	-0.04048	-0.54259	-0.7055	-0.52221	-0.30049	-0.18362	-0.18003	-0.13885	0.214963	0.242859	-0.05277		0.206261	0.102652	0.578381	-0.16986	-0.11311	-0.40705	0.458652	-0.44559	0.048597	0.311235
	-0.785499	-0.476963	0.31064	-1.12785	-0.226723	-0.99984	0.17035	0.171158	-0.392931	0.141848	1.07217	0.3538		0.168547	-0.707951	0.254331	-0.066461	-0.160113	-0.743227	-0.024338	-0.603871	-0.411891	-0.40098	-1.22051	0.0743735		-0.71704	0.016836	-0.38295	-0.90812	-0.44168	-0.38553	-0.23518	-0.25285	-0.20592	0.155396	0.17625	-0.35957		0.341349	0.154691	0.719062	-0.02292	-0.29866	-0.25995	0.253573	-0.32243	0.018073	0.219712
	-0.814878	-0.272421	0.560494	-0.882105	-0.080056	-1.28695	0.236604	0.281038	-0.458136	0.389253	1.18453	0.475933		0.135114	-0.63874	-0.14649	0.206796	0.485335	-0.581973	-0.1438	-1.11953	-0.217955	-0.143594	-0.92483	0.559354		-0.57329	-0.16877	-0.39715	-0.61245	-0.5984	-0.31184	-0.16923	-0.22334	-0.15924	0.066213	0.145147	-0.50547		0.187905	0.036089	0.682838	-0.09488	-0.42927	-0.28982	0.214092	-0.40121	-0.08811	0.070041
	-0.916265	-0.437958	0.604164	-0.711266	-0.513848	-0.699885	0.236172	0.0028488	-0.557486	0.25887	0.942735	0.451417		0.0405437	-0.362063	0.270178	-0.162465	-0.097061	-0.594778	-0.090822	-1.20369	-0.344996	-0.366067	-1.26463	0.765501		-0.65931	-0.28497	-0.32831	-0.66797	-0.56089	-0.47722	-0.18155	-0.15504	-0.21011	0.153119	0.144384	-0.03084		0.222542	0.113072	0.592312	-0.12053	-0.39462	-0.22227	0.190891	-0.46404	-0.27342	0.022774
	-0.721465	-0.181713	0.313142	-0.966818	-0.461829	-1.01479	0.713378	-0.031186	-0.427611	0.190402	0.451249	0.387122		0.188256	-0.384613	-0.026735	-0.340741	-0.022858	-0.576681	-0.193563	-1.44575	-0.000926	-0.365616	-0.862759	0.332398		-0.59823	-0.25411	-0.26691	-0.61612	-0.70205	-0.24752	-0.30011	-0.31355	-0.39564	0.156279	0.177444	0.546362		0.118554	0.198495	0.62699	0.012484	-0.42047	-0.1031	0.213155	-0.37709	-0.15015	-0.16566
	-0.61523	-0.228944	-0.009737	-0.930593	-0.46345	-1.00386	0.84122	0.231687	-0.426958	0.300482	0.492877	0.451129		0.0139452	-0.204935	0.244108	-0.109325	0.175413	-0.211019	-0.214405	-0.938374	-0.430935	-0.28907	-0.811026	0.0445731		-0.68806	-0.21233	-0.42703	-0.718	-0.58311	0.02983	-0.2952	-0.22286	-0.21186	0.070012	0.203776	0.955186		0.222672	0.274714	1.05813	0.03094	-0.41118	0.137965	0.147247	-0.39732	-0.4283	-0.21452
	-0.737802	0.0622613	0.230994	-0.861771	-0.576272	-1.16444	0.714805	0.0435475	-0.16178	0.0647234	0.0065386	0.0573281		0.0773987	-0.317805	0.218952	-0.022412	0.0998394	-0.377651	-0.299481	-0.969939	-0.268066	-0.265494	-0.53108	0.0912189		-0.70085	-0.0157	-0.15315	-0.67914	-0.61788	-0.09117	-0.32694	-0.24729	-0.35886	0.010135	0.134868	0.83248		0.237517	0.39959	1.28951	-0.00716	-0.4953	-0.00875	0.17661	-0.28236	-0.44143	-0.11104
	-0.77358	-0.050343	0.0417308	-1.15349	-0.65844	-1.22982	0.682758	0.306413	-0.04713	0.295862	0.230796	0.376231		0.0433632	-0.180852	0.609188	-0.288339	0.239331	-0.45028	-0.285559	-1.18224	-0.740522	-0.014683	-0.585483	0.007844		-0.52653	-0.27496	-0.29268	-0.54261	-0.58377	-0.34354	-0.27736	-0.3091	-0.09658	0.183104	0.174228	0.886475		0.354348	0.305957	0.770168	-0.14018	-0.39734	-0.19455	0.176992	-0.24724	-0.11186	-0.19771
	-0.682582	-0.001388	-0.034624	-0.98005	-0.522814	-0.954387	0.719392	0.439016	-0.051528	0.374445	0.234243	0.191839		0.168438	-0.119913	0.431292	-0.491774	-0.002525	-0.431411	-0.184869	-0.782545	-0.462596	-0.048424	-0.812995	0.0483193		-0.58956	-0.39633	-0.08762	-0.66657	-0.49982	-0.47849	-0.18501	-0.40757	-0.31945	0.170536	0.125385	0.509802		0.391059	0.242179	0.744594	-0.15579	-0.2836	-0.11482	0.278762	-0.23259	-0.33903	-0.23195
	-0.709564	-0.166875	-0.04716	-1.05379	-0.728259	-0.646215	0.710566	0.422451	-0.009904	0.281214	-0.00331	0.621544		0.131613	-0.182141	0.673956	-0.096307	0.195186	-0.367308	-0.32026	-1.31567	-0.256775	-0.268552	-0.62063	-0.050706		-0.58626	-0.34023	-0.22146	-0.55836	-0.44603	-0.33408	-0.23015	-0.44113	-0.18706	-0.09557	0.119528	0.574825		0.355461	0.121753	0.556409	-0.35555	-0.46098	-0.41701	0.158164	-0.24723	-0.16996	-0.1781
	-0.759777	-0.251951	0.254939	-0.910569	-0.586326	-0.846358	0.660176	0.369895	-0.508269	0.464567	0.342002	0.510442		0.0444894	0.209863	0.509653	-0.281774	-0.020785	-0.29055	-0.420779	-0.615234	-0.450497	-0.266587	-0.640442	-0.35553		-0.62229	-0.31937	-0.02001	-0.58826	-0.50659	-0.16779	-0.1785	-0.45157	-0.40499	0.125462	0.233693	0.44178		0.360855	0.091283	0.448563	-0.4187	-0.43959	-0.26642	0.136463	-0.24574	-0.06663	-0.39584
	-0.736926	-0.380375	-0.004017	-0.964813	-0.548265	-0.825137	0.560204	0.643886	-0.618682	0.198291	0.406716	0.569772		-0.00879	0.312765	0.613286	-0.474667	0.0078654	-0.397269	-0.387614	-0.639162	0.151618	-0.281746	-0.588097	-0.060284		-0.56812	-0.17232	0.022748	-0.62609	-0.7884	-0.1707	-0.11571	-0.33274	-0.20078	-0.16278	0.194543	0.090946		0.216797	0.325742	0.283466	-0.4132	-0.29855	-0.06022	0.118899	-0.15615	-0.31985	-0.34218
	-0.824387	-0.391664	0.0988243	-1.04499	-0.619805	-1.09978	0.705904	0.418389	-0.897288	0.371739	0.547899	0.435227		-0.032969	0.0484056	0.5548	-0.150717	-0.075676	-0.504547	-0.333705	-0.946158	-0.022281	-0.171176	-0.844009	0.194004		-0.74913	0.01721	-0.3476	-0.52464	-0.57922	-0.24356	-0.07207	-0.48029	-0.25962	-0.07385	0.148577	0.301979		0.312382	0.280086	0.40952	-0.37248	-0.26785	-0.08333	0.171772	0.025562	-0.27678	-0.31571
	-0.758758	-0.515449	0.262795	-0.93142	-0.423064	-0.922051	0.617451	0.495861	-0.438574	0.65225	0.228154	0.381022		0.0104022	0.180778	0.443373	-0.353388	0.0138192	-0.337643	-0.334368	-0.547278	0.0165075	-0.115099	-0.881768	-0.222427		-0.7852	-0.02804	-0.16637	-0.66582	-0.72583	-0.09504	-0.16157	-0.46306	-0.38324	0.025244	0.239995	0.198248		0.289831	0.324003	0.395609	0.058172	-0.236	0.123175	-0.00639	0.029587	-0.30021	-0.34632
	-0.660198	-0.842929	0.170498	-0.935598	-0.591191	-0.628039	0.601151	0.504719	-0.393735	0.243773	0.146132	0.546464		0.0784659	0.109698	0.0582846	-0.345999	-0.078939	-0.255904	-0.443365	-0.988336	-0.319311	-0.135728	-1.03704	0.366822		-0.87917	-0.06562	-0.23145	-0.63914	-0.69567	-0.10349	-0.21525	-0.17662	-0.34374	-0.06495	0.05341	0.253284		0.283171	0.190766	0.366283	-0.3828	-0.12278	-0.04691	0.034176	0.001723	-0.33358	-0.56046
	-0.797721	-0.563161	0.0642397	-0.9479	-0.260115	-0.766305	0.919664	0.448501	-0.383478	0.0898502	0.169781	0.725573		0.0399758	-0.328622	0.109437	-0.484669	0.0046238	-0.306147	-0.42964	-0.730179	0.248455	-0.001777	-0.714512	-0.04778		-0.89877	-0.02627	-0.38462	-0.6545	-0.82996	-0.07582	-0.21506	-0.23954	-0.40125	-0.13964	0.200371	0.263044		0.230008	0.175848	0.289074	-0.13594	-0.20361	-0.31696	-0.03479	0.095752	-0.40226	-0.53409
	-0.771917	-0.329814	0.388078	-0.962129	0.528377	-0.828261	1.22134	0.219646	-0.184912	-0.198087	0.07596	0.636934		0.0423937	-0.501155	-0.10661	0.064289	-0.047557	-0.629818	-0.502819	-1.3742	-0.139169	-0.090078	-0.633476	0.0753335		-0.89362	-0.04614	-0.22811	-0.45655	-0.69105	0.137698	-0.10559	-0.58307	-0.24077	-0.05996	0.111106	0.367889		0.29834	0.021196	0.199525	-0.23416	-0.38514	-0.21237	0.09481	-0.0902	-0.15632	-0.36101
	-0.755959	-0.466061	-0.105824	-0.879439	0.406017	-0.411001	1.47084	0.44628	-0.019872	-0.197871	0.408819	0.985893		-0.001093	-0.568352	-0.247181	-0.472424	-0.089966	-0.720599	-0.377203	-0.945317	-0.157613	-0.041859	-0.830909	-0.378649		-0.89097	-0.1888	0.019551	-0.72121	-0.7298	-0.07836	-0.18602	-0.4592	-0.20017	-0.09542	0.18178	-0.02369		0.295195	0.0736	0.512376	-0.14954	-0.39414	-0.10815	0.065031	0.04032	-0.3654	-0.32119
	-0.751633	-0.532747	0.163146	-0.984492	0.187467	-0.640748	1.55349	0.392171	-0.209661	-0.243912	0.180852	1.32339		0.0072592	-0.359666	0.400925	-0.362039	0.206026	-0.477115	-0.572203	-1.50447	-0.227105	-0.003281	-0.874893	0.200609		-0.67425	-0.12969	0.026892	-0.76628	-0.64227	0.176584	-0.20547	-0.49366	-0.13686	-0.04114	0.334792	0.357059		0.184198	0.313995	0.242454	-0.08769	-0.33082	-0.11739	0.046377	0.083164	-0.2898	-0.20953
	-0.742062	-0.525942	0.560087	-0.911414	-0.072186	-0.977271	1.57748	0.712501	-0.235808	-0.47852	0.203598	1.10757		-0.118386	0.0148736	0.138857	-0.393359	0.35277	-0.723155	-0.409869	-1.11583	-0.013039	-0.596104	-0.897179	0.198722		-0.82148	-0.05609	-0.03903	-0.70743	-0.50496	0.035098	-0.12993	-0.49205	-0.41669	-0.24933	0.490111	0.28561		0.165456	0.405173	0.284999	-0.07728	-0.10779	-0.0441	0.028471	0.114011	-0.09457	-0.24239
	-0.618973	-0.602732	0.250214	-0.805195	0.0095974	-0.999687	1.54907	0.370217	-0.314752	-0.071609	0.0338371	0.884228		-0.169826	-0.07383	0.282401	-0.249705	0.117376	-0.777665	-0.438106	-0.906431	0.26426	-0.321367	-1.02964	-0.085743		-0.82212	-0.09263	-0.11864	-0.64666	-0.48194	0.157474	-0.18952	-0.54128	-0.38892	-0.17774	0.228294	0.251985		0.130785	0.393511	0.449209	-0.01836	0.022794	0.065736	0.245601	0.012817	-0.00809	-0.24297
	-0.63506	0.0813167	0.0507855	-0.763407	-0.180798	-0.9593	1.35443	0.477824	-0.449551	-0.310117	-0.194012	0.998261		0.0562772	-0.014026	0.70393	-0.333784	0.155638	-0.707286	-0.230055	-1.00869	0.189014	-0.104732	-0.95361	0.586005		-0.77155	-0.16372	0.019044	-0.66184	-0.40265	-0.14933	-0.09689	-0.55024	-0.42931	-0.13855	0.343455	0.480073		0.210824	0.509927	0.655071	0.104386	0.193365	-0.18971	0.174228	-0.1479	0.002449	0.01864
	-0.784603	0.506711	0.0560802	-0.46038	-0.210911	-0.802901	1.24889	0.134489	0.0634304	-0.294391	-0.175634	0.772517		0.0669592	-0.440125	0.904727	0.370225	0.101886	-0.899118	-0.297638	-1.06872	-0.004777	-0.287447	-0.955359	0.303759		-0.72228	-0.33212	-0.28432	-0.69346	-0.64332	0.367737	-0.14822	-0.65	-0.35251	0.105775	0.287454	0.145888		0.150091	0.545316	0.550449	0.17904	0.134265	-0.29086	0.156795	-0.22566	-0.31429	0.220791
	-0.765957	-0.026061	0.0345902	-0.605098	-0.232446	-0.794036	0.76921	0.0048051	-0.013795	-0.103015	-0.364383	0.330298		0.345853	0.0294617	0.542767	0.544946	0.211232	-0.602524	-0.343809	-1.42868	0.0446698	-0.059039	-1.26547	-0.113411		-0.29654	-0.06712	-0.4842	-0.88924	-0.56016	0.181706	-0.15311	-0.57184	-0.48519	0.336869	0.2692	0.648486		0.07672	0.557003	0.640761	0.075112	0.093067	-0.27632	0.124787	-0.28383	0.115516	0.218468
	-0.659857	-0.179696	0.0947156	-0.865035	-0.437527	-0.602153	0.629047	0.0787333	-0.157361	-0.337886	-0.685343	0.466742		0.223838	-0.387389	0.989919	0.578963	0.628618	-0.669529	-0.425284	-1.14921	-0.192761	0.110824	-1.02604	0.494883		-0.19733	-0.26701	-0.32067	-0.8574	-0.43636	-0.24149	-0.09335	-0.63283	-0.5867	0.172203	0.273774	0.222084		0.108766	0.514385	0.369898	-0.09831	-0.15146	-0.31892	0.161421	-0.43195	0.156769	0.270083
	-0.731588	-0.327386	0.155109	-1.01934	-0.010733	-0.341283	0.637268	0.0302855	0.514113	0.273603	-0.478123	0.511452		0.323183	0.0758839	0.490098	0.426519	0.557835	-0.739913	-0.480919	-0.955704	-0.135011	-0.053606	-0.827459	0.51756		-0.29091	-0.20636	-0.33186	-1.02155	-0.39363	-0.12493	-0.0718	-0.44926	-0.53258	0.213849	0.121774	0.142358		0.063231	0.586907	0.129255	-0.20087	-0.27805	-0.11669	0.173456	-0.34974	-0.03742	0.108012
	-0.670679	-0.239037	0.228603	-0.780051	0.0892353	-0.470927	0.546634	0.04544	0.271995	0.21249	-0.347463	0.513172		0.251505	-0.090003	0.483868	0.280527	0.275324	-1.02609	-0.436067	-0.670306	-0.040393	0.152009	-0.98879	0.710632		-0.41726	-0.1734	-0.45503	-0.7596	-0.59392	-0.16324	-0.06789	-0.48367	-0.68048	0.20045	0.170409	0.345838		0.157668	0.74037	0.197527	-0.24135	-0.23863	-0.05318	0.076511	-0.43873	-0.08305	0.02171
	-0.555362	-0.317676	0.117225	-0.905929	0.517451	-0.711331	0.316858	0.372713	0.0774832	-0.138665	-0.423425	0.34603		0.169208	-0.273285	0.385308	-0.067959	0.215311	-0.833375	-0.471857	-1.26554	-0.315475	0.0158656	-1.05652	0.245514		-0.48272	-0.32462	-0.42112	-0.77326	-0.63234	0.00417	-0.21286	-0.56116	-0.54993	0.15879	0.275698	0.587415		0.1382	0.686392	0.443517	-0.12194	-0.27421	-0.12315	0.050019	-0.41066	-0.1045	-0.06609
	-0.527268	-0.661568	0.19497	-0.730538	-0.164346	-0.825044	0.227816	0.264065	-0.004951	0.0293062	-0.337561	0.179899		0.154475	-0.362888	0.387357	-0.110251	0.107133	-0.526735	-0.455729	-1.08832	-0.303239	0.261586	-0.714348	0.479389		-0.33104	0.001308	-0.27156	-0.77709	-0.59396	-0.04742	-0.08583	-0.55356	-0.66801	0.060188	-0.0113	0.417215		0.13167	0.671288	0.179493	-0.08354	-0.41951	-0.4485	0.065103	-0.51934	-0.29038	-0.07434
	-0.454584	-0.687513	-0.008944	-0.938978	-0.315794	-0.898759	0.255389	0.245958	0.39332	-0.134537	-0.41779	0.575447		0.163519	-0.638122	0.300328	-0.012221	0.158947	-0.721087	-0.349935	-0.889353	-0.322236	-0.311181	-0.459343	0.114331		-0.35248	0.084594	-0.35818	-0.6428	-0.47671	-0.276	0.044105	-0.69219	-0.61192	0.25495	0.074058	0.896245		0.216686	0.616292	0.306735	-0.31803	-0.27466	-0.22494	0.071146	-0.45752	-0.12736	-0.14801
	-0.329123	-0.551748	-0.085079	-0.654624	-0.210966	-0.789836	0.301696	0.410596	0.145934	-0.106146	-0.284922	0.500143		0.112793	-0.654307	0.293925	-0.046636	0.286597	-0.577163	-0.214022	-0.913997	-0.196041	0.0385893	-0.730532	0.27002		-0.43037	0.08059	-0.58905	-0.66344	-0.48648	-0.38004	-0.09643	-0.69547	-0.44457	0.108135	0.245358	0.747835		0.188803	0.516156	0.397733	-0.23762	-0.06907	-0.03378	0.013636	-0.54963	-0.02293	0.016102
	-0.328068	-0.453832	-0.221089	-0.934455	-0.210059	-1.05371	0.323684	0.52611	-0.052235	-0.348409	-0.019056	0.716334		0.298758	-0.450886	0.110131	-0.003912	-0.010414	-0.579087	0.0204957	-0.858562	-0.117884	-0.206286	-0.762795	0.107192		-0.36449	0.098114	-0.44778	-0.71143	-0.48449	-0.10583	-0.14789	-0.69138	-0.4004	0.21655	0.105479	0.593871		0.193529	0.456973	0.488018	-0.2581	-0.18695	-0.20897	-0.09138	-0.53163	-0.05939	0.099893
	-0.116554	-0.302343	0.26359	-0.302879	0.224928	-0.868616	0.208457	0.264693	-0.079987	-0.289271	0.0162311	0.49014		0.114186	-0.18235	0.0848753	-0.083642	0.253781	-0.513944	0.0992435	-0.531712	-0.315612	0.0794456	-0.890727	0.327763		-0.35621	0.311953	-0.27065	-0.6608	-0.5898	-0.22724	-0.14781	-0.71781	-0.64005	0.091428	0.268997	0.176544		0.188842	0.439529	0.611373	-0.35865	-0.2596	-0.32595	-0.01511	-0.51692	-0.04613	-0.06901
	-0.035919	-0.44639	0.0563288	-0.673224	0.329374	-0.601648	0.409673	0.216161	-0.356853	-0.159153	0.0221997	0.370038		0.0487363	-0.434533	0.484661	-0.024009	0.675273	-0.865357	0.161543	-0.609452	-0.245898	-0.595644	-0.598543	-0.081238		-0.4587	0.090303	0.061281	-0.72582	-0.46177	-0.41678	-0.22512	-0.55637	-0.41008	0.119284	0.111104	0.130578		0.124412	0.524758	0.389756	-0.37595	-0.21033	-0.03438	-0.00434	-0.49079	-0.07213	0.046958
	-0.112415	-0.542672	-0.31062	-0.71035	0.382819	-1.16556	0.438181	0.14949	0.0287847	-0.194631	-0.212931	0.0978661		0.132835	-0.438052	0.368309	-0.113981	0.798191	-0.397385	0.159594	-0.736445	-0.35985	-0.291868	-0.717165	0.220326		-0.56244	0.086242	-0.20096	-0.81541	-0.56906	-0.50873	-0.33067	-0.49622	-0.50806	0.148786	0.07272	0.152449		0.159271	0.335422	0.383937	-0.17502	-0.191	-0.28999	-0.02903	-0.53141	0.0493	-0.03779
	-0.257591	-0.496019	0.107419	-1.03543	0.10546	-1.16604	0.439871	0.373918	-0.101576	-0.009798	-0.216215	0.30939		0.236812	-0.448392	0.586619	-0.118958	0.771036	-0.639999	0.147323	-0.197451	-0.462736	-0.281278	-0.495981	0.379334		-0.47465	0.088174	-0.03265	-0.76216	-0.678	-0.29124	-0.29313	-0.55364	-0.42835	0.056585	0.098469	0.427817		0.330976	0.184471	0.337752	-0.37878	-0.43614	-0.44183	0.128583	-0.31014	-0.17098	-0.11618
	-0.150773	-0.505769	0.2235	-0.582227	-0.186232	-1.19094	0.382125	0.700453	0.195219	-0.291143	0.134336	0.1912		0.349101	-0.216027	0.644437	-0.339297	0.628924	-0.815211	0.0341741	-0.757764	-0.391927	0.0021449	-0.491889	-0.080693		-0.5325	-0.04891	-0.11021	-0.80915	-0.59894	-0.19942	-0.29295	-0.54439	-0.31756	0.256928	-0.0395	0.210107		0.375473	0.182098	0.653413	-0.45273	-0.3346	-0.32588	0.126613	-0.35575	-0.03298	-0.10792
	-0.175866	-0.419387	-0.090069	-1.05956	0.0809752	-0.968018	0.341523	0.702836	-0.097968	0.0065823	0.103297	0.560364		0.254613	-0.352855	0.342598	-0.403128	0.259828	-0.494763	0.0584571	-0.988272	0.0176481	-0.391569	-0.789446	0.136241		-0.52314	0.010322	-0.57112	-0.81537	-0.56264	-0.00308	-0.28427	-0.47386	-0.37036	0.477549	-0.08827	0.24537		0.451872	0.093644	0.463154	-0.15898	-0.2548	-0.07393	-0.02337	-0.45814	-0.06253	-0.27251
	0.0139332	-0.415888	0.465656	-0.94318	-0.203416	-1.09597	0.307451	0.692787	0.380707	-0.163196	-0.00124	0.475098		0.0671282	-0.280838	0.437327	-0.206577	0.896033	-0.679169	0.217887	-1.20922	-0.091538	0.202947	-0.349012	0.374796		-0.62063	-0.07325	-0.39738	-0.75806	-0.55338	0.084919	-0.23568	-0.51889	-0.21707	0.212603	0.345142	0.262345		0.417466	0.142748	0.285928	-0.33196	-0.36882	-0.11897	-0.04401	-0.42359	-0.04692	-0.1988
	0.16397	-0.512342	0.106145	-0.980537	-0.236988	-1.0499	0.344944	1.09929	0.0778979	0.127647	-0.246812	0.369184		0.298114	0.0364525	0.497356	-0.371465	0.238943	-0.487708	0.373585	-0.697293	0.43502	0.152621	-0.90409	-0.187463		-0.62139	-0.23007	-0.16463	-0.73897	-0.46859	0.066459	-0.18569	-0.56845	-0.24515	0.538033	0.106107	0.252788		0.652147	0.332339	0.433514	-0.28624	-0.35149	-0.10602	0.012171	-0.2918	-0.21574	-0.33469
	0.151231	-0.376091	-0.375941	-1.13357	-0.192011	-0.879594	0.35245	0.960651	0.464474	0.0429122	-0.516179	0.57376		0.154737	-0.03352	0.355286	0.255043	0.563312	-0.388654	0.507083	-0.689979	-0.323082	0.205221	-0.740166	0.18815		-0.4637	-0.17178	-0.1444	-0.75965	-0.60881	-0.06099	-0.11707	-0.48454	-0.19656	0.552661	0.121262	0.403689		0.427048	0.460916	0.469449	-0.22455	-0.35753	-0.05167	-0.02456	-0.34951	-0.09291	-0.35495
	0.0160022	-0.248711	0.0247553	-0.992393	-0.081743	-0.85785	0.320714	0.976828	0.601343	-0.021	-0.492828	0.637883		0.313601	-0.164747	0.182079	-0.047035	0.172697	-0.429374	0.499307	-1.07308	-0.238546	-0.134457	-0.757739	0.204141		-0.49552	-0.29339	-0.19366	-0.72509	-0.58344	-0.29528	-0.10782	-0.41125	0.044465	0.556895	0.294843	0.437197		0.542692	0.412865	0.177617	-0.53606	-0.50115	-0.17259	-0.04865	-0.44001	-0.02352	-0.19686
	-0.051794	-0.258325	-0.228096	-0.634704	-0.365459	-1.17332	0.444983	0.985329	0.123326	-0.288043	-0.58802	0.825267		0.119103	0.656908	0.788158	0.0960558	-0.011764	-0.621492	0.320023	-0.668857	-0.012372	-0.150876	-0.751025	0.603813		-0.49066	-0.17092	-0.00353	-0.81324	-0.58002	0.23912	-0.08635	-0.55801	-0.35816	0.586292	0.372171	0.488817		0.525201	0.418649	0.521964	-0.49184	-0.43817	-0.17448	-0.00764	-0.56073	-0.16112	-0.22074
	-0.24781	-0.144745	-0.102248	-0.860516	-0.035086	-1.34763	0.532518	0.990843	0.19216	0.146857	-0.474289	0.571286		0.20386	0.444405	0.414388	-0.095596	-0.289735	-0.731331	0.262082	-0.7046	-0.250354	-0.211168	-1.10751	0.797934		-0.5804	-0.15947	-0.15946	-0.6508	-0.34154	0.314623	-0.03339	-0.39664	-0.3715	0.680843	0.233228	0.149405		0.551211	0.425775	0.520364	-0.48147	-0.42773	-0.24434	0.002186	-0.57034	-0.1671	-0.06395
	-0.290521	-0.091657	-0.383677	-0.745617	-0.155895	-1.13759	1.0059	0.49495	0.25681	-0.228539	-0.3145	0.717877		0.413754	0.0924344	0.358834	-0.460971	0.053889	-1.18371	0.126812	-0.924954	-0.099353	-0.275475	-1.06589	0.618839		-0.57911	-0.24414	-0.35784	-0.55631	-0.58491	-0.04918	0.025567	-0.3299	-0.26126	0.901242	0.265898	-0.11424		0.487956	0.411822	0.178822	-0.49454	-0.56819	-0.28507	-0.04389	-0.54531	-0.20757	-0.02635
	-0.224387	-0.168312	0.204736	-1.072	-0.446812	-0.571671	1.19373	0.493287	-0.200061	0.0011772	-0.459477	0.691412		0.348173	-0.116124	0.518947	0.019736	0.0221578	-0.651259	0.20704	-1.212	-0.254328	-0.01087	-1.23002	0.103838		-0.51018	-0.01791	-0.27982	-0.51943	-0.60839	-0.22455	-0.00397	-0.48348	-0.39461	0.908975	0.217402	-0.23487		0.515809	0.433317	0.225413	-0.46216	-0.5566	-0.26732	-0.03982	-0.57384	0.171888	0.281667
	-0.165865	-0.219295	0.0172095	-1.04946	-0.271733	-0.389453	1.188	0.27549	0.142609	-0.120429	-0.385339	0.189408		0.324425	-0.131115	0.338384	0.435582	0.0561803	-0.897391	0.102774	-1.11787	-0.159926	0.438472	-1.15487	0.595167		-0.48736	-0.06987	-0.22913	-0.5987	-0.49125	-0.00959	-0.05475	-0.51802	-0.18169	0.961359	0.04762	-0.15298		0.396288	0.318072	0.258377	-0.43712	-0.48355	-0.22958	-0.22207	-0.66135	0.096129	0.093289
	-0.301723	-0.44243	-0.085191	-0.86027	-0.518598	-0.712172	1.05016	0.450771	-0.001744	0.0095753	0.0617828	0.589791		0.250906	-0.299578	0.553457	0.0469256	0.171014	-0.973864	0.0757968	-1.14223	-0.304972	0.0098721	-0.981681	0.481473		-0.54325	0.188828	0.08433	-0.42295	-0.42138	-0.3438	-0.19344	-0.4208	-0.37204	0.862393	0.171189	-0.08745		0.401263	0.488868	0.455223	-0.50202	-0.37932	-0.30973	-0.10827	-0.7321	-0.11985	0.010722
	-0.290782	-0.663597	-0.085807	-0.721448	-0.563188	-0.476174	0.892674	0.397855	0.392059	-0.024822	0.0564134	1.25649		0.159153	-0.270077	0.343776	0.150003	0.441535	-0.882689	-0.016393	-1.06489	-0.286701	0.227807	-1.03286	0.364419		-0.5197	-0.01299	0.390381	-0.4217	-0.09773	-0.21314	-0.25904	-0.55337	-0.45666	0.800382	0.209665	-0.05468		0.324998	0.432539	0.266645	-0.48737	-0.37628	-0.26094	-0.07253	-0.63014	-0.03448	-0.02541
	-0.22298	-0.703951	0.16105	-0.950791	-0.64058	-0.726856	0.628458	0.522084	0.447229	0.180413	0.0604044	0.896953		0.166723	-0.329227	0.163076	-0.389036	0.334885	-0.898855	0.138727	-1.03537	-0.532297	0.0063909	-0.852997	0.642452		-0.41526	-0.20553	0.106472	-0.50132	-0.32367	-0.21183	-0.21176	-0.54323	-0.2915	0.544109	0.134884	-0.14364		0.241326	0.52701	0.102866	-0.38866	-0.45028	-0.24841	-0.06634	-0.56968	-0.26858	0.14565
	-0.414119	-0.45388	-0.454819	-0.676847	-0.547103	-0.843985	0.73951	0.536666	0.515036	0.259507	0.503233	0.982867		0.0497946	-0.297261	0.0861051	-0.49746	0.262856	-0.501526	0.233072	-0.854877	-0.499938	0.624363	-0.906931	0.519851		-0.34049	-0.10665	-0.16818	-0.3017	-0.14349	-0.46713	-0.15604	-0.47534	-0.49323	0.342699	0.178871	-0.28062		0.263993	0.376575	0.303701	-0.46987	-0.52146	-0.18509	-0.02334	-0.41159	0.013338	-0.03788
	-0.518048	-0.671589	-0.424285	-0.921058	-0.345111	-0.859539	0.599733	0.576612	0.245006	0.275974	0.397432	0.483291		0.168294	-0.13737	0.179098	-0.167307	0.4955	-0.976738	0.194421	-0.949681	-0.278698	0.624968	-0.819096	0.485305		-0.41025	-0.40375	0.124699	-0.50153	-0.23735	-0.28074	0.011304	-0.48561	-0.28977	0.386017	0.157793	-0.02102		0.133668	0.481355	0.387903	-0.56199	-0.50883	0.049236	0.01578	-0.36469	-0.12099	-0.19589
	-0.450279	-0.488525	-0.464728	-0.744477	-0.373169	-1.10292	0.733371	0.424304	0.168787	0.596889	0.368729	0.314871		0.0261855	0.037157	-0.036823	-0.58303	0.57327	-0.832242	0.078803	-0.999498	-0.162264	0.31192	-0.911242	0.588067		-0.30086	-0.36327	0.037012	-0.51646	-0.38024	-0.37833	-0.06443	-0.24636	-0.32135	0.32553	0.060279	0.101145		0.119152	0.514829	0.346146	-0.40039	-0.5415	-0.32552	0.0606	-0.41824	-0.20295	-0.17843
	-0.308229	-0.339173	-0.085076	-0.454094	-0.406684	-1.17	0.960187	0.359854	0.160039	0.793751	0.315838	0.462428		0.0901589	0.0208727	-0.005858	-0.669724	0.413983	-0.55715	0.32067	-0.544725	-0.342108	0.217544	-0.128254	0.377633		-0.28658	-0.38864	-0.15838	-0.4717	-0.40695	-0.25981	-0.05252	-0.1125	-0.12008	0.47498	0.175891	0.419734		0.232768	0.416846	0.399789	-0.53236	-0.52766	-0.07753	0.000635	-0.49424	0.120386	0.051265
	-0.429647	-0.322791	-0.316762	-0.738557	-0.469937	-1.05395	1.19495	0.827881	-0.062759	1.25181	0.662673	0.924103		0.0288079	-0.295579	0.397234	-0.477536	0.3092	-0.571655	0.47967	-0.598269	-0.169154	0.505942	0.782637	0.52746		-0.17874	-0.36299	0.204342	-0.48496	-0.2872	-0.23022	-0.10172	-0.08744	-0.06138	0.402135	0.409649	0.46176		-0.0174	0.416068	0.247735	-0.47944	-0.43198	-0.04539	-0.0317	-0.39801	-0.262	-0.21206
	-0.505773	-0.07208	-0.392974	-0.360492	-0.494385	-0.871079	0.948711	0.864136	0.344727	1.29063	1.70052	0.373856		0.313972	-0.439581	0.269227	-0.563087	0.29983	-0.679065	0.682157	-0.554201	-0.069687	-0.013562	1.90377	0.626667		-0.15928	-0.27573	-0.01749	-0.55978	-0.29294	0.116568	0.019613	-0.18801	0.196846	0.371722	0.338194	0.178667		0.098516	0.488833	0.015409	-0.30798	-0.39573	-0.16814	0.051826	-0.32268	-0.34996	-0.03858
	-0.294981	-0.388477	-0.103942	-0.537886	-0.278554	-0.709606	0.786403	0.893616	0.301529	1.49104	2.67123	0.558834		0.295479	-0.522996	0.185688	-0.313981	-0.065982	-0.685503	0.930461	-0.404647	0.1152	-0.24866	2.35327	0.0053503		-0.24821	-0.38509	-0.04729	-0.429	-0.40615	-0.11764	0.00801	-0.35479	0.159509	0.516411	0.499454	0.21688		0.075279	0.636384	0.171667	-0.48484	-0.47452	-0.13545	0.056801	-0.27199	0.243509	-0.15099
	-0.004845	-0.411689	-0.092292	-0.744164	-0.253741	-0.862186	0.614587	0.630122	0.0843295	1.72529	3.32201	0.652089		0.114008	-0.217131	0.262267	-0.329928	0.351262	-0.895929	0.656842	-0.387311	-0.380034	0.0396205	2.26233	0.481247		-0.28084	0.045089	-0.09672	-0.50091	-0.30561	-0.46809	-0.02157	-0.19816	0.411474	0.816998	0.43379	-0.02146		0.11199	0.600296	0.277853	-0.2246	-0.36699	-0.07265	-0.11283	-0.3065	0.073833	-0.23886
	-0.052333	-0.310647	-0.037991	-0.820712	-0.040531	-0.781718	0.52454	0.503165	0.379645	2.06136	3.7444	1.19901		0.114674	-0.353623	0.295266	-0.163864	0.307051	-0.252601	0.668431	-0.679725	0.122178	0.372611	2.14529	0.0293928		-0.07895	0.047182	-0.00341	-0.75413	-0.45417	-0.07644	0.02653	-0.2318	0.639138	0.51904	0.674445	-0.06363		0.02467	0.542815	0.217981	-0.28495	-0.15258	-0.16634	-0.04444	-0.26168	0.352978	-0.22336
	-0.024433	-0.74353	-0.143535	-0.796486	0.0183207	-0.638408	0.580345	-0.034904	0.683086	1.41484	3.62805	1.33159		0.0991227	-0.350784	0.0288792	-0.507428	0.676654	-0.212709	0.490003	-0.401021	-0.130544	0.37573	1.48552	-0.049602		-0.07619	-0.01281	0.291361	-0.52139	-0.31188	-0.20071	-0.03104	-0.40912	0.731367	0.53584	0.40812	0.049695		0.107213	0.443698	0.117571	-0.52754	-0.30198	0.144477	-0.10141	-0.37858	0.049912	-0.1448
	0.0314194	-0.484438	-0.264803	-0.44531	0.128407	-1.16904	0.49125	-0.035758	0.671962	1.18296	3.12916	1.44134		0.122066	-0.592151	0.503379	-0.821977	0.75043	0.0398281	0.643751	-0.406029	0.218212	0.237476	1.57649	0.177022		-0.12013	0.046658	0.377134	-0.57388	-0.53152	-0.12588	-0.14715	-0.24889	0.237041	0.518063	0.514337	-0.27299		0.563949	0.379257	0.607569	-0.33944	-0.31256	0.319385	0.023429	-0.51227	-0.12877	-0.1258
	0.334258	-0.614748	-0.272615	-0.394712	-0.106251	-1.17541	0.483832	0.153814	0.211399	0.927532	2.66755	1.63089		0.129401	-0.413045	0.324684	-0.437119	0.615439	0.168552	0.524977	-0.261596	0.27307	0.921033	1.5669	-0.176109		-0.06074	0.00905	0.811666	-0.70321	-0.57267	-0.15567	-0.12534	-0.24612	0.574636	0.725692	0.501634	-0.17625		0.533353	0.427362	0.762207	-0.14667	0.172092	0.304254	0.124904	-0.428	-0.04571	-0.24725
	0.375303	-0.45466	-0.160721	-0.323148	-0.410167	-0.989231	0.257882	-0.019793	0.470684	0.780789	2.49041	1.72678		0.242285	-0.245127	0.0588038	-0.67771	0.714762	0.380892	0.43962	-0.702951	0.262729	0.771229	1.17503	0.208993		-0.10859	-0.17885	0.387863	-0.52406	-0.35367	-0.06266	-0.27588	-0.18511	0.274408	0.87326	0.513767	0.040047		0.501619	0.188558	0.788573	-0.16326	0.161973	0.518292	0.136281	-0.35636	-0.24364	-0.14902
	0.50681	-0.567688	0.0688244	-0.589931	-0.378037	-0.984728	0.34408	0.007042	0.242592	1.16035	2.05829	1.41358		0.424254	-0.442318	0.232743	-0.550598	0.667331	0.304538	0.56551	-0.659441	-0.157958	0.465408	0.749737	0.0637855		-0.01849	-0.20761	0.327656	-0.47179	-0.40595	0.086996	-0.27726	-0.17856	0.681421	0.822509	0.59525	0.005379		0.466499	0.233672	0.810559	-0.18777	-0.00154	0.260769	0.115386	-0.35345	-0.14903	-0.11641
	0.104739	-0.323322	-0.071151	-0.429785	-0.285902	-0.654391	0.309976	0.0947446	0.393333	0.966507	1.84829	0.921038		0.617812	-0.185723	-0.196943	-0.243248	0.847455	0.101837	0.677613	-0.339525	-0.006788	0.694438	0.410487	-0.01197		0.004154	-0.15435	0.128373	-0.57495	-0.37832	0.040648	-0.38043	-0.36023	0.566812	0.617112	0.407407	0.164274		0.437511	0.097963	0.6721	0.044066	-0.17984	0.068718	0.058252	-0.33474	-0.34348	-0.17471
	0.0536766	-0.435861	-0.106021	-0.567638	-0.233686	-0.806317	0.169999	0.126334	0.153972	0.623972	1.67504	1.03744		0.498545	0.0582039	0.256472	-0.270457	0.470538	0.0070774	0.582249	-0.383753	-0.111232	0.205791	0.550468	0.261961		0.114519	-0.22012	-0.05634	-0.86574	-0.34527	0.037943	-0.40506	-0.07776	0.520396	0.48685	0.587372	0.093318		0.39556	0.229567	0.353173	0.100657	-0.03635	0.206905	0.065414	-0.42346	-0.04006	-0.00515
	-0.035404	-0.334572	-0.196522	-0.127314	-0.599922	-0.919958	0.388006	0.320228	0.394931	0.460127	1.77611	1.2834		0.416753	-0.053427	-0.236515	-0.403439	0.453144	0.439414	0.590887	-0.302229	-0.504646	0.41097	0.514744	0.172362		0.127253	-0.2019	0.156884	-0.90229	-0.11333	0.052374	-0.36894	-0.16165	0.608106	0.458092	0.553307	-0.03862		0.400635	0.336322	0.619988	0.174984	-0.21424	0.11061	0.039822	-0.13118	-0.11796	-0.09513
	0.448826	-0.279145	0.0992676	-0.236988	-0.559362	-0.842188	0.362167	0.298054	0.181414	0.537657	1.87386	0.690223		0.538521	-0.064853	0.0538148	-0.281925	0.588519	0.187328	0.622934	-0.986181	-0.211975	0.396334	0.324321	0.427202		0.077051	-0.38256	0.008949	-0.86006	0.073563	-0.06974	-0.33766	-0.11806	0.318091	0.146552	0.098081	0.102581		0.425481	0.353411	0.584036	-0.02122	-0.27585	-0.09116	0.046132	-0.09188	-0.16806	-0.11849
	0.89599	-0.521866	-0.331421	-0.394818	-0.528838	-0.821984	0.472199	0.172975	0.268282	0.329761	2.25399	0.536631		0.415521	0.147462	0.0136619	-0.391599	0.80253	-0.203987	0.453445	-0.834095	-0.612097	0.398252	0.476425	0.764518		0.082667	-0.43111	-0.2771	-0.728	0.048442	0.308447	-0.43275	-0.09646	0.172347	0.251261	0.274187	0.1635		0.334431	0.358602	0.722112	0.209239	-0.08086	0.222335	0.133001	-0.14801	-0.48585	-0.16289
	0.976753	-0.517519	-0.420965	-0.805607	-0.693187	-1.01928	0.505244	0.0869059	-0.002743	0.0899768	1.7301	0.0007137		0.233868	-0.248658	0.287857	-0.598405	0.902288	0.0441662	0.560043	-0.611846	-0.437948	0.395256	0.348293	0.7378		0.061423	-0.45643	-0.23349	-0.64568	0.081527	0.107369	-0.41143	0.106529	0.213033	0.329078	0.212418	-0.09191		0.390958	0.469236	0.854551	0.17876	-0.26164	0.198397	0.048438	-0.20336	-0.44532	-0.34795
	0.848133	-0.748207	0.251768	-0.470609	-0.61821	-0.661154	0.417522	0.284899	0.101122	0.263858	1.77888	0.654992		0.148989	0.0135835	0.354342	-0.741735	0.849153	-0.235997	0.732002	-0.761664	-0.303762	0.656224	-0.097858	0.574902		0.121079	-0.45064	-0.44796	-0.61377	-0.00933	0.064893	-0.37579	0.117107	0.571957	0.523303	0.169401	-0.06806		0.408409	0.473872	0.948293	0.29463	-0.131	0.200283	-0.01947	0.086508	-0.22567	-0.13178
	0.904551	-0.787992	-0.049316	-0.794819	-0.418358	-0.73654	0.606025	-0.040147	-0.045791	0.160654	1.55397	0.864173		0.27383	0.118575	0.17664	-0.763674	0.718731	-0.158107	0.569717	-0.240021	-0.560706	0.678259	-0.039729	0.519381		0.099355	-0.34828	-0.18208	-0.69473	0.078148	-0.20063	-0.31179	-0.01811	0.458718	0.712299	0.237278	0.012902		0.378722	0.482577	0.620063	0.305861	-0.06723	0.251379	0.038855	0.175854	-0.08646	-0.32514
	1.15805	-0.639568	0.0429627	-0.642547	-0.661705	-0.708303	0.560789	0.232717	-0.146024	0.0857585	1.24243	0.369797		0.0768969	-0.201034	0.452553	-0.584522	0.578637	-0.545154	0.392821	-0.408119	-0.412123	0.590739	0.157895	0.111336		0.17893	-0.43397	-0.17076	-0.58481	0.052628	-0.19362	-0.2942	0.088925	0.161899	0.82273	0.320885	0.06286		0.437482	0.415401	0.82141	0.281777	-0.19091	0.097122	0.130718	0.233286	-0.46285	-0.35753
	1.13967	-0.758862	0.0433777	-0.723697	-0.307824	-0.802427	0.512522	-0.13859	-0.418778	-0.178684	1.11035	0.420271		0.128109	-0.322358	0.370127	-0.843937	0.333132	-0.127528	0.651579	-0.529936	-0.112915	0.458039	0.010335	0.416697		0.137808	-0.48407	-0.08613	-0.71608	-0.05136	-0.35563	-0.38724	-0.10405	0.12526	0.756733	0.146746	-0.29262		0.409831	0.423123	0.653739	0.174784	-0.33149	0.154924	0.091276	0.145678	-0.37054	-0.45274
	1.04289	-0.860217	0.825049	-0.660738	-0.583598	-0.93008	0.695647	-0.036115	-0.375827	0.0328979	1.05588	0.165775		0.248325	-0.36079	0.140631	-0.734149	0.320895	-0.254718	0.379917	-0.244501	-0.14176	0.63771	0.0537309	-0.032944		0.116864	-0.19183	-0.0028	-0.36731	-0.1231	-0.20558	-0.47957	-0.15111	0.063371	0.640038	0.161014	-0.30142		0.462806	0.359238	0.548564	0.115076	-0.14569	0.454826	0.181127	-0.0325	-0.44682	-0.41943
	1.22438	-0.699545	0.391326	-0.755308	-0.335023	-0.486721	0.833495	-0.449065	-0.384988	0.137752	1.26971	0.145847		0.278015	-0.322269	0.687572	-0.425252	0.525369	-0.111623	0.303577	-0.525383	-0.471831	0.32935	-0.064938	-0.045485		0.12474	-0.36145	0.204859	-0.36415	-0.28905	0.063253	-0.52059	-0.09939	-0.13388	0.713855	0.439849	-0.1959		0.528684	0.391567	0.493046	-0.02078	-0.21815	0.33906	0.24824	-0.1805	-0.56812	-0.41668
	1.26218	-0.622063	0.615408	-0.61992	-0.193839	0.140953	0.769479	-0.155674	-0.260243	-0.241662	1.14911	0.674301		0.320398	-0.39594	0.472484	-0.568096	0.524422	-0.073086	0.343319	-0.083749	-0.002283	0.445333	-0.03736	-0.174963		-0.01068	-0.29648	0.0785	-0.65539	-0.36692	0.051511	-0.49022	-0.28802	-0.19439	0.773837	0.610339	-0.36004		0.498037	0.313831	0.379729	-0.14906	-0.19723	0.325141	0.255852	-0.38716	-0.44488	-0.36226
	1.36105	-0.286549	0.307548	-0.633712	-0.340459	-0.236045	0.75821	-0.147379	-0.451662	-0.207301	1.37937	0.404864		0.394221	-0.334404	0.495299	-0.496495	0.82691	0.23091	0.234416	-0.375868	-0.197072	0.532953	0.255057	0.191796		-0.0244	-0.3678	-0.10885	-0.43279	-0.18983	-0.12244	-0.61303	-0.24327	-0.1463	0.394133	0.535988	-0.33524		0.626692	0.257376	0.431592	-0.04548	-0.1843	0.426745	0.129874	-0.41659	-0.40492	-0.45922
	1.00639	-0.327382	0.500501	-0.962443	-0.389334	-0.304397	0.667694	-0.186682	-0.104671	-0.299332	1.39252	0.745255		0.562117	-0.469583	1.00277	-0.186824	0.300304	0.311311	0.286843	-0.307577	0.076099	0.529956	-0.101785	0.316313		-0.1276	-0.34239	0.236374	-0.40037	-0.20678	-0.01893	-0.48023	-0.29806	0.173256	0.646854	0.333674	-0.43544		0.519325	0.200646	0.664349	-0.26819	-0.15366	0.362655	0.184531	-0.46013	-0.301	-0.37761
	1.04753	-0.323589	0.421119	-0.850427	-0.368949	-0.638799	0.733787	-0.171685	-0.363325	0.101122	1.15918	-0.065369		0.527082	-0.380668	0.6344	-0.655743	0.45252	-0.090611	0.0554533	-0.702431	0.194067	0.298217	-0.166141	0.95193		-0.14549	-0.30902	0.516457	-0.34199	-0.2064	0.130743	-0.52316	-0.34966	0.0473	0.769949	0.216753	-0.61913		0.498085	0.242469	0.466913	-0.19237	-0.20454	0.223343	0.212493	-0.42788	-0.50599	-0.35716
	1.11904	-0.094352	1.06666	-0.839779	-0.261184	-0.538415	0.634062	-0.401307	-0.564933	-0.259781	1.2448	0.167486		0.359522	-0.317534	0.953093	-0.595541	0.160094	-0.081965	0.137091	-0.323704	0.209409	0.400769	-0.257019	0.729643		-0.25058	-0.08587	0.581754	-0.26119	-0.37684	0.397285	-0.54939	-0.30827	-0.13361	0.434466	0.323902	-0.44681		0.560857	0.295299	0.407076	-0.32702	-0.20335	0.05273	0.176905	-0.33329	-0.39981	-0.28317
	1.2898	-0.336423	0.675935	-0.692981	0.0217769	-0.86157	0.815311	-0.112814	-0.426649	-0.138703	1.24046	0.287213		0.358462	-0.582127	0.810234	-0.401201	0.653019	-0.004531	0.162974	-0.358943	0.273939	0.240647	-0.085457	0.467988		-0.24147	-0.13915	0.657527	-0.10193	-0.15938	0.081913	-0.53147	-0.22708	-0.03604	0.600391	0.14279	-0.31282		0.596523	0.504877	0.333102	-0.09811	-0.21612	0.167506	0.0406	-0.17673	-0.35203	-0.20567
	1.54285	-0.287099	0.612693	-1.01489	0.0155043	-0.762452	0.561729	-0.089294	-0.515435	-0.03291	0.950049	0.253251		0.363025	-0.277401	0.113711	-0.369207	0.313635	-0.167479	0.25077	-0.653026	0.467293	0.591874	-0.399346	0.359169		-0.15345	-0.01282	0.350252	-0.27625	-0.35108	0.324121	-0.54405	-0.14216	-0.24623	0.365793	0.362295	-0.09582		0.695711	0.387352	0.303612	0.033716	-0.11656	0.128553	0.284055	-0.23446	-0.28268	-0.31953
	1.38967	-0.270392	0.445946	-0.609048	0.0933562	-0.983703	0.532554	-0.131888	-0.633894	0.0198577	0.675822	0.340144		0.3371	-0.203352	0.429855	-0.073986	0.898734	-0.1206	0.281556	-0.350872	-0.202006	0.589345	-0.469801	0.374548		-0.15178	-0.09042	0.786517	-0.33328	-0.24664	0.218413	-0.54519	-0.00683	-0.08604	0.528807	0.193208	-0.27274		0.856724	0.325038	0.558267	-0.05223	-0.1368	0.072827	0.337825	-0.21118	-0.47903	-0.33044
	0.923569	-0.297389	1.01947	-0.772149	-0.149591	-0.874402	0.582515	-0.300961	-0.342048	-0.051714	0.981223	0.127825		0.397969	-0.400093	0.425351	0.0448991	0.347922	-0.192543	0.270775	-0.557382	-0.214407	0.677495	-0.032495	0.0062691		-0.25089	-0.00302	0.805872	-0.18033	-0.58641	0.178067	-0.53064	-0.12461	-0.14073	0.490681	0.333633	-0.05809		0.842573	0.290857	0.441297	-0.07588	-0.25472	-0.03613	0.297397	-0.15835	-0.51017	-0.381
	0.95839	-0.460391	0.535778	-0.849968	-0.344505	-0.583567	0.70663	-0.444728	-0.680696	-0.383907	0.987317	0.217755		0.29034	-0.451942	0.409438	-0.156731	0.437497	-0.712984	0.0063795	-0.527452	-0.316206	0.898705	-0.295215	0.279725		-0.14534	-0.1006	0.404157	-0.18344	-0.4348	0.402092	-0.3582	-0.11644	-0.12066	0.736025	0.097914	0.079535		0.903018	0.446472	0.838788	-0.20796	-0.18087	0.233994	0.404059	-0.16585	-0.37125	-0.27037
	0.836463	-0.286629	0.56943	-0.606985	-0.271896	-0.548374	0.874348	-0.132019	-0.285137	-0.124049	0.49069	0.170973		0.248512	-0.259099	0.2522	-0.62709	0.723561	-0.612698	0.0006892	-0.666558	0.0606408	0.721013	-0.278379	-0.114796		-0.11949	-0.11419	0.468818	-0.36477	-0.51674	0.220445	-0.34926	-0.38731	-0.10623	0.671972	0.345203	0.37214		0.834371	0.131015	0.447292	-0.16204	-0.20203	0.220299	0.357028	-0.33259	-0.37368	-0.08315
	0.550932	-0.283796	0.374574	-0.727913	-0.624682	-0.755859	0.652519	0.0401925	-0.277529	-0.263633	0.860278	0.467001		0.466041	-0.487867	0.4516	-0.583364	0.272422	-0.438257	-0.052101	-0.731843	0.0577286	0.715874	-0.48739	0.128905		-0.1883	-0.16091	0.382593	-0.47569	-0.32284	0.405491	-0.45526	-0.26596	-0.21689	0.671881	0.31797	0.424102		0.858999	0.18563	0.444169	-0.2821	-0.42671	0.205522	0.294355	-0.19517	-0.19788	-0.2786
	0.512374	-0.029951	0.662484	-1.11373	-0.215425	-1.06902	0.618528	-0.17951	-0.540205	0.107714	0.846181	-0.293387		0.406263	-0.347128	0.516541	-0.220479	0.364546	-0.482302	-0.004952	-0.786313	0.327156	0.515873	-0.122541	-0.027529		-0.1238	-0.14311	0.299655	-0.37626	-0.50633	0.022708	-0.47081	-0.36787	-0.52176	0.600219	0.274722	0.604889		0.764399	0.158279	0.315637	-0.13641	-0.23785	0.394998	0.257351	-0.57309	-0.31804	0.040255
	0.257531	-0.240376	0.430839	-0.769606	0.0378073	-0.779005	0.329608	-0.280755	-0.584852	-0.092473	0.710288	0.0279281		0.399294	-0.310339	0.735643	-0.426917	0.235115	-0.763155	0.115573	-0.604328	-0.016633	0.653092	-0.390112	0.335855		-0.1646	-0.18201	0.304278	-0.41478	-0.5198	0.310163	-0.47059	-0.16932	-0.15336	0.566978	0.475682	0.081928		0.694691	0.178132	-0.0345	-0.13369	-0.18934	0.406309	0.145459	-0.31251	-0.49812	-0.06792
	0.317142	-0.251458	0.860686	-0.926041	-0.428641	-0.525486	0.262418	-0.167858	-0.371145	-0.017912	0.744765	-0.214321		0.398239	-0.276555	0.528262	-0.556877	0.206357	-0.979339	0.0622201	-0.719226	0.70912	0.783452	-0.229976	0.338863		-0.12123	-0.13598	0.012199	-0.45039	-0.59286	0.125603	-0.41578	-0.17345	-0.12537	0.687608	0.395612	0.05405		0.700902	0.172465	0.049757	-0.25493	-0.36393	0.202277	0.115452	-0.30129	-0.37792	0.091362
	0.261689	-0.328633	1.26719	-1.04569	-0.490169	-0.784613	0.266077	-0.343874	-0.409965	0.0727344	0.783437	-0.095315		0.23483	-0.438769	0.531289	-0.239978	0.0373515	-0.641232	0.104419	-0.362074	0.387365	0.88549	-0.212781	0.205721		-0.04378	-0.0157	-0.10817	-0.61945	-0.68264	0.008974	-0.37154	-0.22397	-0.32584	0.441171	0.414387	0.002898		0.701627	0.141539	0.100713	-0.12902	-0.16632	0.347279	0.062925	-0.38495	-0.37944	0.318865
	0.31775	-0.643814	1.22543	-0.803278	-0.682911	-0.948409	0.0678709	-0.301741	-0.097593	-0.126889	0.552311	0.189396		0.211622	-0.146319	0.703928	-0.755135	-0.215343	-0.719921	0.120548	-0.309244	-0.380372	0.662115	0.384428	0.0291085		-0.17104	-0.01413	0.031125	-0.52784	-0.61894	0.198269	-0.14244	-0.40961	-0.16723	0.557769	0.42938	-0.25366		0.510061	0.218101	0.216532	-0.08414	-0.05247	-0.05272	0.178273	-0.37781	-0.10539	0.223764
	0.298505	-0.530607	1.07548	-1.21124	-0.525967	-1.20602	0.281734	-0.231081	-0.262082	0.003878	0.65013	-0.132723		0.170965	-0.545396	0.458398	-0.548454	0.0600269	-0.915904	0.115463	-0.12516	0.0954372	0.923049	-0.446977	0.229903		-0.14657	0.001198	0.223155	-0.39976	-0.77043	-0.0894	-0.36742	-0.20791	-0.26526	0.527164	0.361354	-0.29318		0.46211	0.451295	-0.06333	-0.20251	-0.1777	0.133634	0.210227	-0.42968	-0.36397	0.085816
	0.338476	-0.653652	0.769381	-1.05778	-0.676849	-1.2307	0.275043	0.245788	-0.325249	-0.159423	0.418653	0.322038		0.208975	-0.623762	0.537289	-0.503625	0.140656	-0.977772	0.0715538	-0.068305	-0.242354	1.00471	0.167475	-0.037793		-0.19985	0.056255	0.187256	-0.49158	-0.80296	0.210076	-0.44721	-0.17685	-0.34286	0.265224	0.414977	-0.26755		0.441122	0.371341	-0.27236	-0.07526	-0.08861	0.130212	0.145252	-0.33441	-0.04404	0.119508
	0.396444	-0.559608	0.694759	-0.68826	-0.539338	-1.07578	0.210371	0.254955	-0.414024	-0.112994	0.20545	-0.142977		0.0848531	-0.333451	0.494044	-0.298661	0.042678	-0.576264	0.0926649	-0.261699	-0.517949	1.08243	1.02267	0.0896468		-0.3209	-0.21447	0.083292	-0.17838	-0.70187	0.245041	-0.38786	-0.11342	-0.23601	0.439814	0.426934	-0.18798		0.417807	0.512041	0.119474	0.013492	-0.1926	0.056026	0.162485	-0.40193	0.080365	0.156127
	0.734227	-0.742547	0.871042	-0.570114	-0.698296	-0.773967	0.343694	0.455153	-0.434797	0.0115294	0.557475	0.407703		0.195886	-0.328252	0.381426	-0.573174	0.0172162	-0.704209	0.117098	-0.372036	-0.164345	1.28136	0.673731	0.169456		-0.29307	-0.2228	0.346311	-0.33964	-0.69872	0.356408	-0.39208	-0.00214	-0.28656	0.279368	0.506744	-0.06971		0.357994	0.282195	-0.1648	0.151795	-0.08434	0.28161	0.212407	-0.51828	-0.02004	-0.11112
	0.57962	-0.458653	0.463051	-0.877244	-0.336913	-1.06389	0.450108	0.217848	-0.718032	0.0550472	0.412892	0.191136		0.137988	-0.182291	0.23083	-0.607763	0.0571774	-0.551591	0.0010096	0.208977	-0.143338	0.755706	0.815704	0.131194		-0.24486	-0.28144	0.415005	-0.55719	-0.65747	0.725046	-0.53201	0.001845	-0.16061	0.367849	0.48252	0.020519		0.571118	0.483378	-0.08687	-0.17114	-0.13148	0.112383	0.158804	-0.40005	0.014476	-0.12792
	0.340058	-0.236083	0.589123	-0.731935	-0.66127	-0.995776	0.51168	0.099834	-0.324948	-0.09526	0.730486	-0.296684		0.129732	-0.377497	0.23698	-0.709366	0.150581	-0.498898	-0.114949	0.290967	-0.021965	0.481973	0.804728	0.227484		-0.24062	-0.45035	0.384522	-0.52431	-0.76991	0.792542	-0.55929	0.046729	-0.61437	0.583891	0.308982	-0.15269		0.651296	0.263133	-0.02385	-0.14424	0.080787	0.143172	0.106993	-0.42552	-0.14556	-0.38042
	0.0031645	-0.283181	0.751135	-0.837209	-0.464228	-0.86835	0.560112	0.185907	-0.159648	-0.154814	0.594258	0.230411		0.206723	-0.813226	0.238366	-0.797733	-0.098392	-1.23122	0.0506613	0.0812396	0.0842089	0.737636	0.436096	0.153682		-0.06749	-0.52019	0.215641	-0.6171	-0.5579	0.452882	-0.53048	0.063906	-0.36733	0.282836	0.311161	0.316721		0.625364	0.273457	-0.14511	0.094226	-0.10092	0.109825	0.087372	-0.32362	-0.11187	-0.32434
	-0.03494	-0.203823	1.12402	-0.803245	-0.11709	-1.05086	0.413846	-0.02842	-0.204245	-0.13161	0.774319	0.289817		0.397517	-0.556573	0.193709	-0.79173	-0.255694	-0.732539	-0.11633	-0.106211	-0.095142	0.489383	0.806396	-0.058178		-0.20384	-0.52504	0.120041	-0.56938	-0.40032	0.162929	-0.57535	-0.00739	-0.22853	0.320196	0.122332	0.539008		0.622715	0.197022	-0.08862	0.108884	0.082967	0.098005	0.169975	-0.30205	-0.20756	-0.37239
	-0.028554	-0.017238	0.879056	-0.866989	-0.432307	-0.778283	0.318832	-0.117872	-0.6749	-0.043655	0.644161	-0.244872		0.376026	-0.648489	-0.156043	-0.489907	-0.005679	-0.712032	0.0532244	0.377044	0.0661993	0.680958	0.0218972	0.102622		-0.26241	-0.54507	0.187227	-0.76313	-0.48962	0.207782	-0.35316	0.077716	-0.44679	0.474214	0.19432	0.292363		0.53032	0.177124	-0.00841	0.012174	-0.12468	0.19916	0.08599	-0.255	-0.09054	-0.19266
	-0.162371	-0.255081	0.588656	-0.618132	-0.421159	-1.0736	0.393277	-0.007378	-0.629775	-0.145435	0.541774	0.488364		0.359202	-0.592699	0.596649	-0.676427	0.117183	-0.50133	-0.038141	0.0471918	-0.00949	0.37065	-0.092663	-0.310043		-0.33116	-0.41418	0.278553	-0.63667	-0.60158	0.252936	-0.38277	-0.1337	-0.31018	0.384373	0.237873	0.047703		0.463034	0.191842	-0.10804	0.087432	-0.08536	0.334254	-0.02304	-0.18897	0.130497	-0.49175
	-0.104646	-0.072158	0.595046	-0.82358	-0.290863	-0.785138	0.367342	-0.061945	-0.272996	-0.024186	0.647855	0.0832315		0.191738	-0.540602	0.714423	-0.588651	0.26772	-0.558466	-0.140196	0.137995	-0.293397	0.197674	0.0101932	0.233336		-0.21487	-0.62851	0.188897	-0.47069	-0.62861	0.368547	-0.36213	-0.15637	-0.45927	0.306353	0.17823	0.047672		0.343827	0.12585	-0.01804	0.028651	-0.16794	0.391773	-0.13114	-0.2294	0.15508	-0.27441
	-0.156016	-0.462642	0.45744	-0.790619	-0.519202	-0.990727	0.371198	-0.076137	-0.667583	-0.263713	0.76934	0.67053		0.319683	-0.457405	0.769488	-0.420713	-0.073299	-0.628621	-0.251677	-0.00608	-0.450138	0.682002	0.0604337	-0.235049		-0.16137	-0.18904	0.189023	-0.63045	-0.47554	0.482575	-0.30163	-0.2296	-0.08945	0.302821	0.133128	-0.28572		0.324198	0.163501	0.156747	0.036442	-0.17756	0.349342	-0.13931	-0.13967	-0.09586	-0.29842
	-0.16221	-0.319504	0.58216	-1.07923	-0.661929	-0.891169	0.525732	0.0892207	-0.181591	-0.197735	0.577462	0.517671		0.365742	-0.707823	0.546102	-0.143171	-0.286768	-0.751104	-0.250807	0.0174686	-0.488958	0.0261803	-0.255385	-0.041746		-0.15683	-0.56324	0.293874	-0.47426	-0.59903	0.298445	-0.37195	-0.4926	-0.20366	0.044291	0.192644	-0.06388		0.32035	0.241403	0.105779	-0.06537	-0.23684	0.071679	-0.10093	-0.10419	0.160316	-0.04221
	0.174638	-0.254328	0.465231	-1.06554	-0.195852	-0.492206	0.509191	0.153274	-0.689354	0.0918124	0.708276	0.595748		0.495274	-0.298751	0.401036	-0.035971	0.18543	-0.417135	-0.130912	0.138406	-0.241688	0.439562	-0.435225	-0.148485		-0.1394	-0.52326	0.155618	-0.59837	-0.46738	0.109026	-0.36441	-0.29036	-0.41418	0.268035	0.007963	0.361974		0.450922	0.282437	-0.25762	-0.0433	-0.17905	0.235042	-0.17298	-0.11879	0.167173	-0.10753
	0.396298	-0.422307	0.138039	-0.889864	-0.385876	-0.735215	0.480336	-0.040251	-0.592589	-0.281678	0.324223	0.306835		0.267965	-0.58947	0.277124	-0.508871	0.133445	-0.838845	0.0580693	0.169732	0.210427	-0.048417	-0.248049	0.139876		-0.29049	-0.44058	-0.01532	-0.72696	-0.39221	0.472923	-0.39573	-0.31926	-0.42463	0.256261	0.24097	-0.02578		0.356244	0.151564	0.028811	0.11811	-0.1566	0.10041	-0.23659	-0.17417	0.067645	-0.02366
	0.194253	-0.35181	-0.040143	-0.67477	-0.442808	-1.08903	0.31908	0.0207323	-0.450182	-0.195069	0.227842	0.536634		0.0917003	-0.335337	0.439059	-0.507468	0.0721595	-0.584955	0.151382	-0.130798	-0.406015	0.139727	-0.2302	0.450361		-0.37553	-0.5128	-0.00491	-0.65356	-0.38426	0.651624	-0.40646	-0.25259	-0.40715	0.004193	0.2607	0.219168		0.406909	0.39322	0.018928	0.256879	-0.25742	0.199551	-0.22699	-0.2116	0.311566	0.026481
	0.0667605	-0.531994	0.0786864	-0.887449	-0.14687	-0.695293	0.424459	-0.199101	-0.954071	-0.303408	0.437999	0.929044		0.101897	-0.413328	0.332143	-0.5131	0.01387	-0.763858	0.217891	0.083242	-0.457406	0.19704	0.0672806	0.229995		-0.46136	-0.48625	0.138641	-0.72767	-0.61218	0.505487	-0.41577	-0.33755	-0.39572	-0.06151	0.376221	0.041738		0.331653	0.445128	-0.0496	0.004505	-0.21155	0.185473	-0.25601	-0.12571	0.017193	0.12376
	-0.184939	-0.24465	-0.478615	-1.09463	-0.329303	-0.676377	0.200222	-0.183568	-0.35328	-0.254198	0.211534	0.54782		0.0898373	-0.463272	0.424134	-0.265986	-0.207598	-0.737961	0.347224	-0.173393	-0.392434	0.23049	0.614345	-0.066592		-0.37252	-0.47129	0.115529	-0.70501	-0.60037	0.903219	-0.45935	-0.19673	-0.36426	-0.04255	0.276818	0.242424		0.361508	0.291359	-0.09097	0.174387	-0.09662	-0.06008	-0.09177	-0.16923	0.159567	0.074515
	-0.2486	-0.411475	0.310697	-0.776622	-0.453422	-0.55485	0.136882	-0.230514	-0.459274	-0.278798	0.107619	1.08515		-0.049625	-0.686824	0.346768	-0.095617	0.020758	-0.317927	0.655571	0.150815	-0.164883	0.152758	0.891448	-0.231692		-0.27608	-0.44405	0.11384	-0.69357	-0.6886	0.451865	-0.44832	0.071919	-0.27722	-0.10119	0.18737	0.205386		0.280356	0.242527	-0.13234	0.032387	-0.08428	-0.02047	-0.08562	-0.04326	0.087352	-0.1226
	-0.230099	-0.370837	-0.194668	-0.921866	-0.673033	-0.491724	0.0614049	-0.42179	-0.645933	-0.428596	-0.112073	0.457859		-0.044046	-0.510036	-0.013759	-0.590056	0.0356311	-0.521506	0.585834	-0.561764	-0.15787	0.438567	0.882963	0.0017428		-0.46386	-0.12269	0.102064	-0.72198	-0.61311	0.140314	-0.46685	0.0494	-0.48126	0.020461	0.413754	-0.01788		0.227022	0.197067	0.056428	0.20412	-0.20574	0.16552	-0.28783	-0.16056	-0.18946	0.064175
	-0.215102	-0.360374	-0.047249	-1.04057	-0.316735	-0.003335	0.0830248	-0.141512	-0.655088	-0.030996	0.0652731	0.566488		-0.114052	-0.630332	0.46232	-0.300925	-0.016706	-0.789601	0.446025	-0.748663	-0.503188	0.238975	0.783164	-0.184274		-0.45857	-0.02582	0.232639	-0.72778	-0.55124	0.189659	-0.56127	0.142712	-0.46779	-0.20383	0.136488	0.046159		0.317921	0.227936	-0.05716	0.352967	-0.32309	0.26274	-0.32477	-0.2961	0.058227	-0.11932
	-0.276931	-0.151859	-0.064399	-0.787306	-0.396314	-0.70939	0.114829	-0.027226	-0.30844	-0.034611	0.212406	0.286944		-0.187456	-0.685008	-0.04954	-0.60757	-0.03082	-0.998083	0.272685	-0.636413	-0.444363	0.391087	0.399757	-0.230176		-0.58361	-0.36149	-0.00383	-0.65183	-0.40907	0.174136	-0.54699	0.052499	-0.51635	-0.16214	0.235934	0.131098		0.197496	0.336675	-0.10107	0.184239	-0.46227	0.157594	-0.32349	-0.13703	0.060534	0.187127
	-0.346354	-0.107427	0.111457	-1.00458	-0.542061	-0.260087	0.275365	-0.256167	-0.060893	-0.007441	-0.010483	0.188594		-0.157933	-0.266099	0.0023629	-0.819349	-0.226162	-0.814224	0.249673	-0.946561	-0.584278	0.369295	0.395385	0.143527		-0.59059	-0.41128	-0.03055	-0.76961	-0.43893	0.117709	-0.63422	-0.16841	-0.53849	-0.04354	0.270083	-0.3293		0.217894	0.269732	-0.18014	0.165004	-0.54255	0.053988	-0.36311	-0.08294	-0.11699	0.13947
	-0.275416	-0.137472	-0.515311	-0.924111	-0.057033	-0.414712	0.327743	-0.209279	-0.413322	-0.184665	0.0437165	0.209461		-0.081668	-0.442782	0.151155	-1.1105	-0.195933	-0.951733	0.290541	-0.512848	-0.596554	0.449761	0.432152	-0.08396		-0.56597	-0.56174	0.323368	-0.58256	-0.56912	0.323666	-0.72136	0.048526	-0.6032	-0.00072	0.090417	-0.25236		0.145895	0.072947	0.045476	-0.05364	-0.44207	0.229089	-0.33358	-0.10169	-0.1406	0.133691
	-0.348568	-0.10765	0.0149302	-0.594074	-0.33459	-0.464109	0.698253	-0.023106	-0.474231	-0.27769	0.159817	-0.00226		-0.086122	-0.364558	0.231589	-0.749345	-0.038402	-0.466007	0.249105	-1.11936	-0.5235	0.600901	0.226265	-0.314535		-0.54066	-0.53979	0.461479	-0.72876	-0.77848	0.183709	-0.60186	-0.16742	-0.59799	0.049074	0.219995	-0.22897		0.249039	-0.02193	0.085867	-0.0365	-0.29831	0.087334	-0.39547	-0.19418	-0.29879	0.375721
	-0.089568	-0.135987	-0.164806	-0.553748	-0.33887	-0.580651	0.73602	-0.280243	-0.314734	-0.239826	0.222408	-0.009671		0.0869756	-0.174203	-0.327781	-0.848306	0.104304	-1.0249	0.2038	-0.95678	-0.617746	0.541431	-0.015318	0.0724903		-0.51778	-0.55436	0.330231	-0.76722	-0.49975	0.309916	-0.76305	0.047583	-0.55663	0.18872	0.082389	-0.29966		0.282904	-0.11067	-0.00241	-0.08818	-0.47582	0.092866	-0.27509	-0.30228	-0.3014	0.276804
	-0.018681	-0.394563	-0.104473	-0.664886	-0.31099	-0.660657	0.873223	-0.192196	-0.514025	-0.278637	0.357193	0.336199		0.0123601	0.176834	0.406165	-0.791487	-0.049939	-0.705314	0.0863095	-0.774832	-0.551656	0.663911	0.0237911	0.21345		-0.41155	-0.73386	0.36054	-0.58055	-0.48245	0.083254	-0.71608	-0.07091	-0.33844	0.228318	0.068344	-0.06538		0.213577	-0.13832	-0.02379	0.059287	-0.37144	0.176742	-0.31116	-0.13505	-0.0602	0.287415
	-0.16995	-0.322285	0.523427	-0.642793	-0.290103	-0.470462	1.06552	-0.308292	-0.502945	-0.030351	0.163618	0.439068		-0.127154	-0.380962	0.217159	-0.575068	-0.089331	-0.667298	0.0617327	-0.673303	-0.704853	0.443346	-0.143459	-0.207912		-0.51048	-0.69667	0.372016	-0.77632	-0.67604	0.105052	-0.68047	0.025025	-0.51929	0.065696	0.046364	-0.21736		0.19615	-0.14804	-0.03797	-0.09542	-0.38611	0.015346	-0.41733	-0.25625	-0.40548	0.19526
	-0.280211	-0.31304	0.540835	-0.397362	-0.361328	-0.392305	0.99244	-0.318012	-0.338772	-0.414817	0.537139	0.140997		-0.244127	-0.346604	-0.103311	-0.651308	0.257576	-0.742541	0.0240234	-0.870114	-0.423623	0.474109	-0.204583	0.406874		-0.46197	-0.8243	0.141526	-0.8162	-0.41658	-0.22094	-0.68881	0.151658	-0.55724	0.212106	0.018712	0.009745		0.195077	-0.00364	0.491893	-0.10028	-0.25507	0.167148	-0.37505	-0.20746	-0.08105	0.00172
	-0.305761	-0.349625	0.852648	-0.530096	-0.203411	-0.309992	0.886154	-0.177512	-0.55195	-0.236135	0.278327	0.0503529		-0.100745	-0.492025	0.0237448	-0.939553	-0.034816	-0.672462	0.0454131	-0.671235	-0.341323	0.595418	0.219694	0.410276		-0.38031	-0.59786	-0.08429	-0.80786	-0.46496	-0.16609	-0.74152	-0.14359	-0.17741	-0.02054	-0.09352	-0.17633		0.058651	-0.06046	0.204278	-0.0027	-0.42027	-0.107	-0.33136	-0.08886	-0.35613	0.191411
	-0.208233	-0.382834	0.68834	-0.570572	-0.109281	-0.527718	0.737051	-0.29398	0.144832	-0.369165	0.505226	0.252064		-0.059597	-0.392215	0.208778	-0.636138	0.210958	-0.824419	0.0317892	-0.506005	-0.292876	0.384081	-0.181633	0.633552		-0.33258	-0.65142	0.023563	-0.86237	-0.4308	-0.39483	-0.70904	0.142758	0.079979	0.147128	0.108745	-0.0955		0.060602	-0.00859	0.278607	-0.05913	-0.48799	0.06459	-0.44719	-0.18181	-0.33723	0.100471
	-0.280846	-0.47705	0.175559	-0.758161	-0.245235	-1.04111	0.637743	-0.091858	-0.670874	-0.462646	0.137436	0.228195		0.04882	-0.306978	0.19603	-0.446675	0.191964	-1.17165	-0.12043	-0.537414	-0.194537	0.750134	-0.077896	0.840475		-0.42877	-0.76434	-0.13315	-0.79466	-0.78435	-0.08662	-0.77509	0.049526	-0.41365	0.072489	0.070748	-0.58285		0.242565	0.094589	0.105901	0.065767	-0.46546	-0.09984	-0.25668	-0.1532	-0.15627	0.037761
	-0.17496	-0.254126	0.465775	-0.773473	-0.436926	-0.73521	0.673094	0.0764053	-0.283538	-0.18748	0.28059	0.097666		-0.019413	-0.391424	0.073786	-0.691874	0.333832	-0.772996	-0.104992	-0.810384	-0.034888	0.582247	0.0206692	0.555075		-0.37621	-0.66925	-0.01938	-0.75421	-0.60139	-0.39618	-0.75764	0.043023	-0.18587	0.291378	0.052157	-0.21834		0.350019	0.093377	0.295288	-0.0951	-0.61149	0.153299	-0.38955	-0.23614	-0.10261	0.007932
	-0.271783	-0.386961	-0.002911	-0.664029	-0.335112	-0.715509	0.498786	-0.223314	-0.264998	-0.072784	0.204604	0.507121		0.0995011	-0.423237	0.24726	-0.494952	-0.037386	-0.90781	-0.084747	-0.447802	-0.370765	1.02376	0.141331	0.338245		-0.41036	-0.76869	0.161047	-0.88575	-0.70673	-0.47576	-0.67448	0.078435	-0.09371	0.032071	0.06259	-0.26817		0.230753	0.050809	0.333205	-0.08265	-0.46733	0.292838	-0.27649	-0.11722	0.118527	-0.07798
	-0.164576	-0.293835	0.0063028	-0.757969	-0.137739	-0.654515	0.326922	0.186463	-0.30744	0.0252874	0.270749	0.161172		-0.006501	-0.539924	0.365753	-0.44457	0.47674	-0.807853	-0.241328	-0.700186	-0.393754	0.647408	-0.235742	0.256724		-0.46576	-0.78275	0.029398	-0.72968	-0.67257	-0.22512	-0.65493	0.136273	-0.36333	-0.03679	-0.08658	-0.11144		0.368158	0.217706	0.10341	-0.01434	-0.44643	0.154089	-0.17526	-0.1118	-0.17252	-0.11813
	0.0908699	-0.471084	0.228239	-0.762665	-0.157596	-0.603478	0.232685	0.169226	-0.348377	0.190049	0.094	0.464909		-0.038798	-0.403962	-0.199098	-0.529555	0.177334	-0.793774	-0.193361	-0.93262	-0.489884	0.855609	-0.217764	0.379248		-0.36634	-0.61776	-0.13656	-0.63219	-0.8004	-0.35843	-0.74555	0.054729	-0.31273	-0.0361	0.034127	-0.37545		0.397293	0.329885	0.127875	-0.14317	-0.35636	0.108123	-0.11028	-0.14881	-0.17357	-0.00324
	0.139671	-0.386741	0.428943	-0.685144	-0.146503	-0.843256	0.0987462	0.746618	-0.729912	0.0633079	0.296858	-0.0043		-0.061853	-0.510165	0.441344	-0.267383	0.152997	-0.694277	-0.189235	-1.05185	-0.516167	0.652279	-0.447746	0.401384		-0.28774	-0.46937	-0.1426	-0.74637	-0.73192	-0.39387	-0.60152	-0.01348	-0.04455	-0.04306	0.082124	0.161766		0.348472	0.494159	0.219486	-0.16888	-0.43355	0.247809	-0.03009	0.064895	-0.23981	0.074929
	0.228076	-0.384169	0.165828	-0.634237	-0.34281	-1.02873	0.169674	0.357978	-0.455173	0.0118597	0.156551	0.352293		-0.081425	-0.523862	0.210453	-0.817156	0.13352	-0.449559	-0.295288	-1.1903	-0.574608	0.5316	0.0213979	-0.005597		-0.55818	-0.59207	-0.29766	-0.5986	-0.55019	-0.31931	-0.72578	0.079302	-0.38427	0.187223	-0.27441	-0.03679		0.446576	0.332692	0.360806	-0.25007	-0.36522	0.161106	0.129381	0.129833	-0.11941	0.042508
	0.260234	-0.183092	0.155375	-0.884988	-0.53108	-0.898774	0.16821	0.368103	-0.138095	0.0864438	0.281336	0.37727		-0.062818	-0.800537	-0.054021	-0.491706	0.0006006	-0.653648	0.0085648	-1.19056	0.0510024	0.353584	-0.10212	0.170245		-0.60399	-0.47489	0.039558	-0.67058	-0.73705	-0.15368	-0.78142	0.111549	-0.35732	0.099276	-0.10643	-0.15073		0.431354	0.414668	0.426748	-0.12921	-0.36346	0.281772	0.127733	0.207962	-0.18191	-0.24737
	0.0518792	-0.1272	0.694761	-0.755	-0.572666	-0.594105	0.159116	0.280378	-0.322359	0.0645172	-0.030144	0.0257981		-0.0842	-0.838157	0.376621	-0.817296	-0.129696	-0.356123	-0.177649	-1.51964	-0.033865	0.246419	-0.55549	-0.225815		-0.47399	-0.36856	-0.15982	-0.84109	-0.47406	-0.37212	-0.91301	0.151003	-0.46213	0.046488	-0.16207	-0.13482		0.426594	0.191716	0.399761	-0.30703	-0.35955	0.179887	-0.00384	0.144219	-0.22239	-0.0239
	-0.136242	-0.382924	0.895389	-0.604544	-0.407956	-0.864434	0.148227	0.45856	-0.300405	0.0189677	0.210859	0.136441		-0.055559	-0.619094	0.425847	-0.598557	0.02351	-0.384188	-0.123344	-1.24924	-0.346651	0.305847	-0.628167	0.50757		-0.48534	-0.39386	0.02965	-0.88088	-0.71721	-0.14343	-0.72484	0.293677	-0.18953	0.229386	-0.26151	0.224346		0.49517	0.382225	0.46803	-0.39518	-0.42218	0.216026	-0.10026	0.183144	-0.12774	0.011318
	-0.067717	-0.291309	0.538952	-0.631003	-0.403786	-0.680929	0.139212	0.412209	-0.153745	0.0315958	0.156233	0.0659444		-0.012487	-0.856642	0.0893087	-0.664897	0.118914	0.39789	-0.149931	-0.841479	0.0705694	0.266758	-0.448955	-0.110443		-0.58393	-0.2526	-0.1222	-0.70224	-0.55599	-0.14221	-0.82706	0.167679	-0.27516	0.200606	-0.06921	-0.10575		0.354114	0.321873	0.412073	-0.32244	-0.35712	0.050339	-0.07564	0.148597	-0.21588	-0.11626
	0.249335	-0.225314	0.754389	-0.597784	-0.156168	-0.57922	-0.065657	0.539803	-0.444178	0.0185061	0.0036154	0.178382		0.0152902	-0.660142	-0.021216	-0.770977	-0.048552	0.291361	-0.08832	-1.27085	-0.06863	0.507904	-0.351566	-0.227006		-0.65273	-0.14763	0.042166	-0.75808	-0.50928	-0.10879	-0.70295	0.050215	-0.29148	0.226737	0.156347	0.016559		0.356998	0.405659	0.33852	-0.30352	-0.44607	0.191423	-0.08534	-0.06447	-0.30234	-0.12787
	0.489862	-0.12632	0.327507	-0.869249	-0.361348	-1.02875	0.045742	0.621206	-0.064991	0.0938126	-0.201592	0.189096		-0.05541	-0.411049	0.324903	-0.961174	-0.103624	0.287614	0.138385	-1.43019	-0.073419	0.166669	-0.175902	0.0098975		-0.66728	-0.261	-0.07404	-0.7818	-0.52605	0.026718	-0.87246	0.106255	-0.37195	0.189036	0.107219	0.027786		0.389268	0.470401	0.349738	-0.28803	-0.38547	0.165718	-0.04614	-0.05326	-0.22819	-0.13846
	0.509063	-0.485553	0.549456	-0.770613	-0.073469	-0.837186	-0.008862	0.13838	0.438166	0.0949047	-0.24961	0.0234583		-0.002521	-0.436897	0.265586	-0.85637	-0.185248	0.0530128	0.10271	-1.21658	0.143322	0.255317	-0.381556	0.279657		-0.57656	-0.19986	-0.52826	-1.0227	-0.51804	0.004398	-0.83699	0.055817	-0.34388	0.195438	0.233697	0.208507		0.450862	0.617464	0.665357	-0.30534	-0.38561	0.252755	-0.00372	-0.05567	-0.39633	-0.1005
	0.398871	-0.280104	0.502169	-0.903848	-0.402775	-0.43416	-0.056616	0.166469	0.148213	-0.171874	-0.197934	-0.179388		0.0769724	-0.408359	0.187035	-0.78033	0.146511	-0.027311	0.0158796	-1.22117	0.395591	0.57903	0.0332021	0.0290354		-0.66151	-0.2635	-0.01236	-1.01597	-0.50245	-0.21117	-0.89341	-0.10758	-0.50867	0.196693	0.060009	0.344529		0.271499	0.726701	0.564652	-0.28408	-0.43294	-0.01159	0.016882	-0.02899	-0.15217	-0.06097
	0.174132	-0.353097	0.0908678	-1.03022	-0.411222	-0.358545	0.0497839	0.253013	-0.176351	0.0132679	-0.08652	0.598863		-0.028944	-0.691714	0.156169	-0.676004	0.091859	-0.05068	-0.203057	-1.14807	0.19462	0.710404	-0.688403	0.483371		-0.60546	-0.23957	-0.05724	-0.94042	-0.56923	-0.06305	-0.87317	-0.12962	-0.43824	0.241926	0.353505	0.050588		0.338938	0.535994	0.303723	-0.22685	-0.22311	0.083029	-0.1259	-0.07963	-0.37348	0.027058
	0.0069734	-0.393873	0.071948	-0.662796	-0.313705	-0.78461	0.110566	0.501893	0.0910138	-0.016307	-0.007954	0.487596		0.0443944	-0.788699	0.172098	-1.02209	0.159929	0.0393914	-0.178872	-1.01332	-0.031692	0.415648	-0.138867	0.781492		-0.47969	-0.37998	-0.19216	-0.85071	-0.62054	-0.17714	-0.78876	0.11241	-0.3844	0.092084	0.492936	0.101263		0.367327	0.737324	0.490659	-0.41364	-0.24093	0.238668	-0.12445	-0.03167	-0.23031	0.172745
	0.0138938	-0.4594	0.0985646	-0.783325	-0.434599	-0.604638	0.235148	0.709262	0.0748073	-0.073484	-0.016631	0.015994		-0.100137	-0.833943	0.0074041	-1.10931	0.25868	-0.336756	-0.296681	-1.12324	0.40411	0.393092	-0.486349	0.52543		-0.49746	-0.40039	-0.3588	-0.82448	-0.39229	0.020161	-0.82909	-0.12902	-0.5431	0.200414	0.5165	0.186382		0.405942	0.755452	0.566446	-0.42073	-0.20045	0.221988	-0.09077	0.159746	-0.16064	0.027725
	-0.134513	-0.43889	0.290731	-0.898924	-0.688236	-0.871167	0.178518	0.504427	0.236974	0.23168	-0.059169	0.214188		-0.010994	-0.399565	0.0449272	-0.962887	-0.308566	-0.142462	-0.340465	-1.01971	-0.046263	0.317459	-0.294478	0.223416		-0.45676	-0.36829	-0.00829	-0.80973	-0.43062	0.22437	-0.72077	-0.35083	-0.31996	0.075023	0.325873	0.18138		0.578352	0.674998	0.397175	-0.26822	-0.09732	0.09715	-0.14053	0.000752	-0.21549	0.222145
	-0.08739	-0.510223	0.0479246	-0.865302	-0.452192	-0.723278	0.188543	0.935622	-0.138183	0.0748874	0.17504	0.213484		0.0004391	-0.255741	0.0250221	-0.651971	0.0901967	-0.121189	-0.217724	-0.801243	0.268402	0.34529	-0.45059	-0.210129		-0.57601	-0.29582	-0.36693	-0.83083	-0.44795	0.212739	-0.70427	-0.38607	-0.32584	0.048046	0.512714	0.052176		0.455505	0.568454	0.577627	-0.31969	-0.00699	-0.76958	-0.14691	-0.04388	-0.17043	0.462012
	-0.056058	-0.448797	-0.180442	-0.944093	-0.717189	-0.953087	0.144062	0.433207	0.202188	0.186763	0.0085646	0.195258		0.158762	-0.216453	-0.184793	-0.878205	-0.206597	-0.373426	-0.194009	-0.688839	0.56898	0.0203966	-0.337881	-0.122443		-0.53652	-0.22855	-0.22406	-0.75243	-0.56709	0.163024	-0.61854	-0.23044	-0.31127	-0.13153	0.144427	-0.15472		0.415869	0.733306	0.431006	-0.19646	0.127408	0.139055	-0.05887	0.011272	-0.29875	0.268479
	-0.171368	-0.634713	-0.063654	-0.820723	-0.422552	-0.946727	0.0585333	0.183858	-0.211336	0.164403	0.218663	0.174942		0.139133	-0.405422	-0.164955	-1.02536	0.0488766	-0.737543	-0.195291	-1.25299	0.330643	0.0820867	-0.137087	-0.088658		-0.57812	-0.22221	-0.1436	-0.74734	-0.71354	0.098686	-0.61078	-0.09972	-0.6075	-0.08337	0.178862	-0.02227		0.358911	0.589859	0.280204	-0.30363	0.333965	0.204085	-0.08638	-0.03212	-0.28786	0.257608
	-0.161446	-0.231466	-0.07827	-1.14599	-0.144393	-0.582986	-0.080086	0.159289	-0.350803	0.14895	-0.155249	0.0475514		0.149632	-0.421522	-0.074334	-1.26349	0.0455413	-0.338427	-0.404737	-0.979106	0.218119	0.0650112	-0.669154	0.188073		-0.54025	-0.12699	-0.11091	-0.79532	-0.48711	-0.20309	-0.66799	-0.30673	-0.49882	0.01881	0.204501	-0.04489		0.433146	0.842635	0.263039	-0.33872	0.449744	0.070609	-0.14258	-0.17174	-0.16949	0.249415
	0.157189	-0.34507	-0.184864	-0.963948	0.39448	-0.669423	0.0601806	-0.014292	0.0392677	0.0572042	-0.081661	0.195859		0.0898293	-0.45919	0.23416	-0.692474	0.314741	-0.369008	-0.361632	-1.62595	0.546898	-0.252754	-0.406065	0.331189		-0.73316	-0.09721	-0.11661	-0.66017	-0.5631	-0.25357	-0.64372	-0.1957	-0.58676	-0.17439	-0.01278	0.03601		0.457934	0.805456	0.26328	-0.31732	0.490742	0.307134	-0.17807	-0.178	-0.31267	0.233146
	0.195436	-0.581278	-0.164069	-0.872954	0.348813	-0.827981	0.197758	-0.190759	0.154016	0.153675	-0.083805	0.0222257		0.174538	-0.538298	-0.183638	-0.708442	-0.082449	-0.446563	-0.154389	-1.49128	0.299198	-0.447916	-0.639341	0.48142		-0.4966	-0.2694	-0.25052	-0.73113	-0.53946	-0.31441	-0.76201	0.011306	-0.44744	-0.26426	0.090908	-0.1097		0.488595	0.782399	0.080426	-0.1617	0.483938	0.211561	-0.07347	-0.28095	-0.0735	0.074718
	0.243982	-0.517104	-0.132097	-0.914785	0.119265	-1.04242	0.0446392	-0.175813	-0.361485	0.167576	0.0096933	0.049225		0.304038	-0.649047	-0.071034	-0.498208	-0.107489	-0.492383	-0.176047	-1.35347	0.136527	-0.089129	-0.936638	0.669542		-0.50956		-0.53434	-0.7048	-0.32543	-0.22608	-0.91282		-0.6811	-0.05207	-0.02116	0.055193		0.418938	0.801063	0.605646	-0.26275	0.24861	0.41097	-0.17953	-0.1177	-0.35464	0.150276
	0.300322	-0.296101	-0.099359	-0.922631	0.0951722	-0.82146	0.0277171	-0.1166	-0.546223	0.303983	0.0479473	0.0039321		0.27903	-0.405172	0.200554	-0.714553	0.0358059	-0.813124	0.0187791	-1.54588	-0.236913	-0.126633	-0.279155	1.20556															0.592859	0.735519	0.08756	-0.49431	0.365886	0.593101	-0.17837	-0.25434	0.123654	0.163797
[truncated: 14 more columns]

## Sheet: 2e
	preNoise						Noise						preTone						Tone
	2R	3L	4L	5L	6L	7L	2R	3L	4L	5L	6L	7L	2R	3L	4L	5L	6L	7L	2R	3L	4L	5L	6L	7L
1	0.840517	1.4079	1.76716	2.12532	1.16941	1.87865	1.32306	1.55943	3.4764	4.62142	6.58693	3.09203	0.523119	1.01074	0.802829	1.53398	1.08941	2.36416	0.643582	1.22058	1.75541	3.56195	5.44271	2.61664
2	0.872706	1.04438	1.50611	1.47178	0.988485	1.86831	1.3187	1.104	2.12258	3.52362	5.05225	2.24056	1.16829	1.30002	0.709098	2.11004	1.63246	1.96382	0.248389	1.65078	1.06625	3.02755	3.76251	1.27625
3/4	1.2556	0.608341	2.24549	1.25314	1.76361	2.06284	0.786162	1.24119	2.90326	1.7708	3.51049	4.24211	1.35136	1.3668	1.80989	0.592927	2.07032	2.27181	1.3549	1.17923	1.88035	2.12848	3.1102	1.95081
5/6	1.43641	1.41027	1.71533	1.2706	1.22237	1.09	1.39015	1.0254	2.05148	2.28532	2.75156	1.68942	1.05398	1.30052	0.964871	0.988022	1.50217	1.27178	0.887949	1.05446	1.11965	1.74271	1.60404	1.63045
7/8	1.13515	1.53494	0.637852	0.495087	1.83617	0.837959	1.16788	1.40361	1.53194	1.66678	2.61882	1.37468	1.49294	1.19111	0.920196	0.886734	0.943323	1.31251	1.11723	1.54345	1.28239	1.23506	1.65476	1.71099

## Sheet: 2f
	preNoise						Noise						preTone						Tone
	2R	3L	4L	5L	6L	7L	2R	3L	4L	5L	6L	7L	2R	3L	4L	5L	6L	7L	2R	3L	4L	5L	6L	7L
1	-0.958974	0.232731	0.77115	1.21098	-1.2053	-0.671427	-0.42515	0.718808	2.36873	4.29034	8.29679	3.15949	-0.956802	-0.218055	-0.994575	-0.428479	-1.11238	1.41023	-0.789731	0.104389	0.0896576	2.25808	5.99121	1.50368
2	0.190566	-0.625153	0.327041	0.246434	-1.15278	0.238574	1.59742	-0.194074	2.24449	2.42893	7.18246	1.82324	-0.503942	0.204637	-1.85555	1.47087	-1.47829	0.754168	-1.35762	-0.003363	-1.40497	2.58231	2.30632	0.501229
3/4	0.677181	-1.19659	1.54985	0.044739	-0.20056	1.10493	0.120532	-0.56216	3.11694	0.85426	3.55219	3.40071	0.916741	0.332115	0.956043	-0.92769	1.14343	0.160646	0.940695	-0.07508	0.847842	1.05683	2.7952	0.412234
5/6	1.03397	0.123551	0.566105	0.307964	0.444233	-0.26898	0.818366	-0.03658	1.92008	2.21901	2.40744	0.84587	-0.73521	0.180676	-0.2344	-0.35928	-0.26153	1.22867	-0.48407	-0.3013	-0.24263	0.82736	0.287716	1.3381
7/8	-0.10227	0.291267	-0.8197	-1.27091	-0.00084	-0.84326	0.161512	0.130898	1.08637	1.07608	2.24888	0.420882	0.306692	0.313187	-0.18004	-0.46666	-0.8809	0.704916	0.319191	0.415597	0.190547	0.378153	-0.04299	0.874743

## Sheet: 2-1a
Time	2R	3L	4L	5L	6L	7L
-5	-0.061029	0.118991	0.373086	-0.114288	0.172465	0.116091
-4.94876	-0.149269	0.0288416	0.3852	-0.162365	0.20568	0.117802
-4.89751	-0.188955	0.194231	0.241015	-0.11038	0.168706	0.198902
-4.84627	-0.248824	-0.005907	0.374816	-0.137151	0.332338	-0.026705
-4.79502	-0.191181	-0.026511	0.247139	-0.199354	0.30295	-0.014776
-4.74378	-0.283274	-0.109688	0.339932	-0.184788	0.361747	-0.078711
-4.69253	-0.154823	-0.083973	0.32991	-0.198177	0.357857	0.0916289
-4.64129	-0.117079	-0.238096	0.298506	-0.269094	0.284863	0.257619
-4.59004	-0.094777	-0.165021	0.244122	-0.177617	0.16309	-0.128415
-4.5388	-0.055888	-0.281287	0.267613	-0.163684	0.248563	0.111416
-4.48755	-0.086856	-0.267318	0.241884	-0.099383	0.271891	0.106528
-4.43631	-0.078087	-0.250495	0.358794	-0.095297	0.264979	-0.112972
-4.38507	-0.044563	-0.209035	0.237491	-0.09572	0.262727	0.0180957
-4.33382	-0.042713	-0.207336	0.304169	-0.098197	0.284227	0.221574
-4.28258	0.0211574	-0.246843	0.131871	-0.203315	0.321575	-0.065099
-4.23133	0.106871	-0.169753	-0.00756	-0.172572	0.261351	0.152693
-4.18009	0.234058	-0.204469	0.125825	-0.159519	0.184731	0.115652
-4.12884	0.209477	-0.015618	0.139732	-0.158233	0.166717	-0.080076
-4.0776	0.196213	0.0246271	0.0719735	-0.163343	0.178089	0.222342
-4.02635	0.239271	-0.022209	0.0172467	-0.087973	0.156157	0.0828533
-3.97511	0.211947	0.0804362	-0.09201	-0.122277	0.23652	-0.022567
-3.92387	0.185622	-0.068199	0.0299809	-0.207644	0.252167	0.0560163
-3.87262	0.284712	-0.042153	0.0828732	-0.17167	0.18205	0.0084767
-3.82138	0.173208	0.0026099	-0.067593	-0.178378	0.128955	-0.009201
-3.77013	0.222062	0.08879	0.0084722	-0.200907	0.140945	-0.057449
-3.71889	0.335608	0.0046113	0.0842489	-0.157988	0.119773	-0.144341
-3.66764	0.292642	-0.102959	-0.014468	-0.106421	0.276921	-0.252131
-3.6164	0.210343	0.0429492	-0.030112	-0.186896	0.398587	-0.093586
-3.56515	0.149824	-0.16164	0.0180053	-0.159067	0.466616	-0.029994
-3.51391	0.0777448	0.0492538	0.0197743	-0.180143	0.351373	0.0804311
-3.46266	0.0746818	0.0117686	0.0710443	-0.17984	0.32792	0.0726788
-3.41142	0.0722645	0.0819647	-0.045162	-0.213395	0.301998	0.0660252
-3.36018	0.0539004	0.171415	0.0734528	-0.190194	0.248644	0.242019
-3.30893	0.029914	0.109936	-0.015063	-0.196151	0.324704	0.166105
-3.25769	0.0459244	0.303378	0.0404919	-0.217335	0.379915	0.0853004
-3.20644	0.0625622	0.256308	0.0489743	-0.242055	0.417042	-0.100576
-3.1552	0.131401	0.245818	0.0091492	-0.298977	0.346737	-0.149824
-3.10395	0.0354997	0.190016	0.146672	-0.363579	0.337598	-0.054946
-3.05271	0.0483639	0.0732508	0.012486	-0.322004	0.323017	0.0592274
-3.00146	0.106187	0.168683	0.0298165	-0.286572	0.284207	-0.003921
-2.95022	0.0593015	0.0958136	0.0946453	-0.288611	0.284321	0.233992
-2.89898	0.0042011	0.222037	0.0565157	-0.259598	0.349428	0.15884
-2.84773	0.0649897	0.0622826	0.0747497	-0.325416	0.298105	0.0565685
-2.79649	0.0380877	0.0714693	0.0286554	-0.321224	0.326145	0.182997
-2.74524	0.0771076	0.204164	0.0494274	-0.29407	0.416453	0.105016
-2.694	0.151268	0.0842418	0.0372157	-0.23949	0.371151	0.155254
-2.64275	0.255275	0.112897	0.0234328	-0.189798	0.292391	0.126271
-2.59151	0.0676408	0.0074528	-0.050797	-0.188693	0.273886	-0.080124
-2.54026	0.0157745	0.015795	0.055312	-0.158153	0.481046	-0.05784
-2.48902	0.0001309	-0.111786	0.0227781	-0.119373	0.569559	-0.026935
-2.43777	0.0028536	-0.137603	0.156934	-0.105795	0.656152	-0.193367
-2.38653	-0.051066	-0.141746	0.264501	-0.108249	0.620159	-0.124797
-2.33529	-0.053463	-0.341072	0.135791	-0.158114	0.56684	0.0260831
-2.28404	-0.07766	-0.196399	0.258983	-0.140356	0.616849	0.0322395
-2.2328	-0.053742	-0.260995	0.262998	-0.11982	0.440873	-0.020231
-2.18155	-0.025709	-0.371476	0.110041	-0.193882	0.451241	-0.112703
-2.13031	-0.016816	-0.397773	0.25698	-0.178619	0.463527	-0.087926
-2.07906	-0.036616	-0.412743	0.235213	-0.038607	0.376155	-0.020516
-2.02782	-0.160817	-0.283863	0.212391	-0.043528	0.360335	-0.096228
-1.97657	-0.100454	-0.25823	0.325925	-0.039024	0.484548	-0.11254
-1.92533	-0.208124	-0.317592	0.265617	-0.087645	0.587317	0.015209
-1.87408	-0.20553	-0.211469	0.312419	-0.087781	0.588772	-0.097252
-1.82284	-0.150266	-0.313198	0.252163	-0.063793	0.58571	-0.172448
-1.7716	-0.072164	-0.333879	0.292122	-0.108932	0.62581	-0.113437
-1.72035	-0.119144	-0.235249	0.190904	-0.077001	0.707316	0.0109366
-1.66911	-0.138123	-0.154075	0.243247	-0.053727	0.810125	-0.073343
-1.61786	-0.201178	-0.15086	0.274712	-0.0713	0.742213	0.119805
-1.56662	-0.26158	-0.174556	0.267699	-0.044226	0.692521	0.161671
-1.51537	-0.167601	-0.189471	0.0877804	-0.109749	0.647736	0.241309
-1.46413	-0.044788	-0.233888	0.204367	-0.104499	0.567769	0.187843
-1.41288	0.0037868	-0.109495	0.200324	-0.080338	0.553809	0.196937
-1.36164	-0.142843	-0.034621	0.0583313	-0.1854	0.568372	0.196527
-1.3104	-0.221134	-0.044619	0.0635282	-0.069572	0.52046	0.0995863
-1.25915	-0.215813	-0.073018	0.0547387	-0.15523	0.530013	0.0690784
-1.20791	-0.226634	-0.078247	0.0883294	-0.098913	0.565633	0.111146
-1.15666	-0.129659	-0.12301	0.209093	-0.203597	0.459271	0.19851
-1.10542	-0.019513	-0.179592	0.0918244	-0.208495	0.367535	0.381086
-1.05417	0.114326	-0.227555	-0.001461	-0.331514	0.335028	0.578553
-1.00293	0.112097	-0.231027	0.139	-0.303557	0.361036	0.608754
-0.951684	0.146366	-0.181209	0.0473061	-0.176605	0.354715	0.378743
-0.900439	0.159016	-0.031015	0.0979432	-0.117821	0.334608	0.408504
-0.849195	0.185929	-0.057205	0.0482697	-0.043288	0.392624	0.161388
-0.79795	0.156626	-0.091148	0.175509	0.102716	0.22854	0.285579
-0.746706	0.119732	-0.024411	0.212323	0.266012	0.18341	0.266219
-0.695461	0.114143	0.0554932	-0.055545	0.429622	0.198412	0.249162
-0.644217	0.0772666	0.145045	0.0059953	0.405788	0.212153	0.165395
-0.592972	0.185108	0.0041753	0.110965	0.474146	0.408399	0.0094582
-0.541728	0.32834	0.0028191	0.0238857	0.521991	0.62207	0.0108065
-0.490483	0.373076	-0.17766	0.08712	0.396	0.828814	-0.031071
-0.439239	0.349965	0.0465481	0.0936736	0.514462	1.08739	0.125517
-0.387994	0.365606	0.0717656	0.15567	0.483488	1.14033	0.201432
-0.33675	0.508897	0.194987	0.159403	0.613149	1.2027	0.547162
-0.285505	0.757232	0.11747	0.193313	0.603869	1.18778	1.0057
-0.234261	0.723892	0.172891	0.25451	0.588889	1.22444	0.859449
-0.183016	0.705845	0.312165	0.398288	0.529549	1.14305	0.948374
-0.131772	0.795819	0.415556	0.561916	0.474249	1.14756	0.634581
-0.0805271	0.907991	0.439397	0.847689	0.606699	1.11129	0.700578
-0.0292826	0.966779	0.351182	1.08792	0.778376	1.04901	0.676617
0.0219619	1.11167	0.421976	1.38159	0.793017	1.12847	0.679818
0.0732064	1.09099	0.67431	1.60456	0.780104	1.23301	0.690976
0.124451	1.16253	0.715311	1.88623	0.990789	1.46384	0.866461
0.175695	1.20272	1.04603	2.13741	1.08354	1.53972	1.11752
0.22694	1.3443	1.25441	2.31497	1.17749	1.60347	1.02131
0.278184	1.52596	1.53138	2.59742	1.24326	1.83883	1.01441
0.329429	1.68782	1.54008	2.67552	1.2883	1.93847	0.918828
0.380673	1.70256	2.01203	2.6947	1.22829	1.9294	0.787545
0.431918	1.79289	2.20715	2.80502	1.23603	1.81516	0.587778
0.483163	1.87663	2.48319	2.99056	1.21888	1.78594	0.577653
0.534407	1.79174	2.57005	3.07602	1.16297	1.83313	0.761244
0.585652	1.8241	2.48178	3.01428	1.11307	1.90604	0.837944
0.636896	1.69045	2.4663	3.00465	1.13097	1.95459	0.81019
0.688141	1.79282	2.50165	2.80315	1.20493	1.9399	0.777975
0.739385	1.67557	2.44261	2.93456	1.14754	1.99262	0.774895
0.79063	1.57377	2.34659	2.91388	1.17517	2.03467	0.524492
0.841874	1.59413	2.14611	3.11764	1.06162	2.0244	0.535355
0.893119	1.56858	1.98767	3.03223	1.16914	1.88162	0.695611
0.944363	1.51627	1.8222	3.07183	1.15086	1.73864	0.427938
0.995608	1.60758	1.73528	2.97044	1.05373	1.8401	0.267818
1.04685	1.47567	1.7297	2.80907	1.10436	1.86206	0.268747
1.0981	1.45102	1.50416	2.72921	1.06128	1.80141	0.17422
1.14934	1.49002	1.35128	2.67651	0.994033	1.72528	0.035488
1.20059	1.53849	1.33692	2.51737	0.899127	1.69098	0.0704087
1.25183	1.54103	1.2941	2.32488	0.954522	1.60548	0.0157922
1.30307	1.50414	1.30449	2.21151	0.914827	1.59635	-0.02714
1.35432	1.52989	1.41832	2.24713	0.926643	1.5404	0.12589
1.40556	1.54583	1.40951	2.14551	0.866996	1.46196	-0.0948
1.45681	1.62907	1.4236	1.89156	0.817562	1.53956	-0.106835
1.50805	1.61589	1.23473	1.79491	0.80528	1.37112	0.105223
1.5593	1.81863	1.11916	1.80383	0.791122	1.2576	0.0614607
1.61054	2.00225	1.09139	1.789	0.806017	1.20084	0.0825903
1.66179	2.01698	1.01922	1.84819	0.736453	1.13436	0.128346
1.71303	1.99608	0.778494	1.79545	0.711622	1.1089	0.197344
1.76428	2.02698	0.818811	1.58593	0.686593	1.0502	0.0517884
1.81552	2.01158	0.573797	1.55478	0.762853	0.968729	0.0498207
1.86676	1.93278	0.712382	1.56917	0.708756	0.910295	-0.005867
1.91801	1.9114	0.811491	1.51731	0.709402	0.944564	-0.036447
1.96925	1.77952	0.759722	1.60089	0.66866	0.960375	0.0469549
2.0205	1.76345	0.913891	1.62658	0.77491	0.840051	-0.141737
2.07174	1.83742	0.734216	1.53781	0.737182	0.860946	-0.069763
2.12299	1.85043	0.772542	1.44131	0.601883	0.782323	-0.047537
2.17423	1.74911	0.804159	1.38924	0.616933	0.902987	0.0384228
2.22548	1.78643	0.593163	1.41912	0.650625	0.954524	-0.038431
2.27672	1.66981	0.479965	1.58037	0.533835	0.984574	0.0475157
2.32796	1.64289	0.461245	1.36902	0.449587	1.02472	-0.087716
2.37921	1.65755	0.45088	1.49202	0.545254	0.970507	-0.067972
2.43045	1.71111	0.401093	1.33191	0.501842	0.922046	0.0476024
2.4817	1.52465	0.325193	1.29625	0.446172	0.912137	-0.153538
2.53294	1.5537	0.193283	1.11664	0.408383	0.738843	-0.22229
2.58419	1.51382	0.367132	1.15272	0.446781	0.657242	-0.158263
2.63543	1.41849	0.380887	1.07054	0.393884	0.574536	-0.242972
2.68668	1.52702	0.43019	0.886721	0.401432	0.436578	-0.059863
2.73792	1.4833	0.533976	0.992418	0.471716	0.513354	-0.051663
2.78917	1.46494	0.672393	1.02267	0.408368	0.584513	-0.056646
2.84041	1.38864	0.694735	1.00482	0.362738	0.684455	-0.072589
2.89165	1.2691	0.707414	0.978535	0.371282	0.658024	-0.070068
2.9429	1.07016	0.724917	0.999224	0.400987	0.552991	0.276585
2.99414	1.11934	0.673863	0.940161	0.37407	0.531921	0.317701
3.04539	1.0509	0.56711	0.977169	0.365165	0.508345	0.307579
3.09663	0.982023	0.399361	1.03805	0.361943	0.410174	0.343224
3.14788	0.935372	0.271334	0.864545	0.368226	0.338444	0.261535
3.19912	0.959256	0.159341	0.889457	0.392327	0.316673	0.186412
3.25037	0.773397	0.261446	0.89409	0.280321	0.422463	0.089182
3.30161	0.845705	0.102725	0.873549	0.241453	0.427872	0.11946
3.35286	0.936472	-0.02577	0.962632	0.218484	0.52386	0.004662
3.4041	0.96028	-0.180536	0.888104	0.272215	0.495212	0.0680615
3.45534	1.01381	-0.200275	0.82019	0.226014	0.441718	-0.00206
3.50659	0.943967	-0.272877	0.850097	0.270099	0.48021	-0.049804
3.55783	0.931968	-0.310831	0.744468	0.356723	0.519388	-0.088434
3.60908	0.780856	-0.273051	0.774485	0.347931	0.484944	-0.210851
3.66032	0.750943	-0.304606	0.680527	0.321026	0.56048	-0.068708
3.71157	0.78416	-0.413952	0.660635	0.3301	0.569877	-0.06377
3.76281	0.721247	-0.292647	0.695034	0.238955	0.537388	-0.18373
3.81406	0.803548	-0.257134	0.729863	0.248216	0.574902	-0.257348
3.8653	0.831117	-0.067763	0.703603	0.315233	0.600258	-0.332528
3.91654	0.882068	-0.144658	0.696149	0.234237	0.602203	-0.195025
3.96779	0.897911	-0.324837	0.665808	0.274979	0.63123	-0.021278
4.01903	0.839627	-0.322719	0.781025	0.257501	0.665961	-0.197669
4.07028	0.825611	-0.150061	0.72494	0.233932	0.641175	-0.03386
4.12152	0.760447	-0.009698	0.844345	0.154801	0.705914	0.033992
4.17277	0.733544	-0.134251	0.75135	0.12289	0.578084	0.270835
4.22401	0.743095	-0.210613	0.793843	0.179836	0.609863	0.239355
4.27526	0.663225	-0.293649	0.807967	0.138119	0.56541	0.284284
4.3265	0.703078	-0.293411	0.893012	0.112913	0.510925	0.178059
4.37775	0.677983	-0.377226	0.772179	0.203061	0.605337	0.4708
4.42899	0.66137	-0.316247	0.785246	0.15182	0.612346	0.463903
4.48023	0.652919	-0.386759	0.760561	0.224019	0.660345	0.30254
4.53148	0.593783	-0.421846	0.730861	0.181675	0.677332	0.242358
4.58272	0.582699	-0.556909	0.748056	0.181837	0.580217	0.0991687
4.63397	0.547633	-0.450364	0.720813	0.10705	0.528755	-0.081845
4.68521	0.515524	-0.485295	0.63175	0.0611023	0.462957	-0.17848
4.73646	0.443891	-0.492325	0.667977	0.0623537	0.385289	-0.14356
4.7877	0.551249	-0.496215	0.733061	0.083713	0.434221	-0.140855
4.83895	0.533783	-0.429108	0.731451	0.0705718	0.473559	0.0053913
4.89019	0.469673	-0.391511	0.773521	0.0883575	0.558597	-0.109645
4.94143	0.461042	-0.412161	0.790861	0.0234193	0.575391	0.020448
4.99268	0.45776	-0.322135	0.714653	0.0263273	0.588698	0.0045155
5.04392	0.482093	-0.382726	0.811673	-0.000583	0.447187	-0.061143
5.09517	0.285864	-0.449938	0.565555	-0.036954	0.469746	0.106595
5.14641	0.349691	-0.601317	0.686824	-0.018	0.401819	0.0879444
5.19766	0.433368	-0.506968	0.661975	-0.106354	0.428396	0.028183
5.2489	0.440042	-0.443277	0.694385	-0.083624	0.428982	-0.061637
5.30015	0.361404	-0.47442	0.785661	-0.1643	0.385367	-0.039888
5.35139	0.381342	-0.514944	0.849611	-0.039996	0.513041	-0.137877
5.40264	0.388851	-0.405888	0.636123	-0.066025	0.704946	0.0455836
5.45388	0.314524	-0.440586	0.669628	0.0096019	0.6607	0.0469207
5.50512	0.441683	-0.478825	0.687053	-0.010059	0.685946	0.0151651
5.55637	0.423799	-0.445052	0.575623	0.0065866	0.627707	-0.035678
5.60761	0.42957	-0.549294	0.629462	-0.09534	0.500933	-0.004091
5.65886	0.470769	-0.594739	0.570241	-0.026868	0.426481	-0.31
5.7101	0.607535	-0.473707	0.728982	-0.042358	0.356336	-0.280316
5.76135	0.545346	-0.472174	0.733792	-0.052863	0.38337	-0.394249
5.81259	0.560313	-0.541277	0.637633	-0.081512	0.303009	-0.292329
5.86384	0.486566	-0.673868	0.690827	-0.071517	0.333034	-0.289941
5.91508	0.380391	-0.577151	0.53567	-0.101623	0.322104	-0.156578
5.96633	0.322485	-0.63278	0.433286	-0.055682	0.430287	-0.097458
6.01757	0.353748	-0.69016	0.471854	-0.005358	0.455898	0.0381597
6.06881	0.472318	-0.854129	0.453915	-0.01921	0.554011	-0.045635
6.12006	0.470021	-0.721572	0.348136	-0.019726	0.554814	0.242972
6.1713	0.496896	-0.603742	0.246589	0.0466634	0.40799	0.143902
6.22255	0.608347	-0.5747	0.352209	0.113056	0.415312	0.0053956
6.27379	0.692476	-0.491546	0.33306	0.129888	0.442458	0.0373893
6.32504	0.545233	-0.556546	0.301746	0.0998498	0.317553	-0.121304
6.37628	0.583502	-0.585022	0.399431	0.203032	0.481104	-0.126308
6.42753	0.718734	-0.45594	0.279782	0.177012	0.425418	-0.013988
6.47877	0.714862	-0.438101	0.259405	0.171633	0.421356	-0.067158
6.53001	0.586582	-0.47377	0.310716	0.253426	0.414139	-0.274767
6.58126	0.574243	-0.546197	0.239646	0.135056	0.421488	-0.245015
6.6325	0.632534	-0.557213	0.149709	0.107827	0.451981	-0.293757
6.68375	0.657847	-0.445222	0.193235	0.139199	0.429	-0.299677
6.73499	0.652102	-0.370762	0.173212	0.123277	0.510086	-0.236589
6.78624	0.688823	-0.534796	0.232412	0.190369	0.444052	-0.360471
6.83748	0.671348	-0.520056	0.336278	0.126907	0.485706	-0.115894
6.88873	0.551407	-0.496814	0.269716	0.0987166	0.416601	-0.348165
6.93997	0.564365	-0.464904	0.446855	0.190072	0.497255	-0.247731
6.99122	0.533851	-0.354042	0.51306	0.0485776	0.426516	-0.354586
7.04246	0.465512	-0.361702	0.345961	0.126899	0.415728	-0.284286
7.0937	0.652263	-0.382642	0.379484	0.172699	0.393209	-0.11553
7.14495	0.675328	-0.362804	0.38168	0.195726	0.556419	-0.141872
7.19619	0.633786	-0.344373	0.378505	0.129761	0.587522	-0.099488
7.24744	0.711488	-0.248681	0.33551	0.170968	0.683139	0.0490721
7.29868	0.652978	-0.258833	0.406182	0.187524	0.677427	0.131888
7.34993	0.598085	-0.170397	0.424246	0.236404	0.701447	0.168476
7.40117	0.587276	-0.234407	0.445636	0.20945	0.729799	0.205154
7.45242	0.514774	-0.184607	0.541271	0.276195	0.831411	0.0783073
7.50366	0.491579	-0.328013	0.564105	0.108676	0.821679	0.0901517
7.5549	0.465964	-0.420561	0.452677	0.18342	0.768613	0.153103
7.60615	0.448754	-0.439412	0.395371	0.285526	0.693661	0.0587444
7.65739	0.411153	-0.420157	0.554417	0.241974	0.634148	-0.017218
7.70864	0.410156	-0.424981	0.496478	0.258103	0.516832	-0.151352
7.75988	0.409005	-0.388228	0.361351	0.263584	0.637195	-0.218899
7.81113	0.355395	-0.505957	0.506179	0.295549	0.525175	-0.117907
7.86237	0.337689	-0.438097	0.383002	0.352332	0.52559	-0.20226
7.91362	0.349353	-0.588258	0.42671	0.239125	0.356444	0.0731493
7.96486	0.357275	-0.40932	0.404628	0.276886	0.396486	-0.115395
8.01611	0.41165	-0.372741	0.488704	0.233351	0.378925	0.146094
8.06735	0.449603	-0.442445	0.439698	0.2838	0.459151	0.166989
8.11859	0.495717	-0.426086	0.461098	0.285311	0.403809	0.210379
8.16984	0.574193	-0.480657	0.470717	0.216236	0.431598	0.166021
8.22108	0.581073	-0.370673	0.539644	0.193424	0.517383	0.253918
8.27233	0.596905	-0.43013	0.518409	0.149674	0.569087	0.297735
8.32357	0.558793	-0.467074	0.407602	0.178003	0.496473	0.230862
8.37482	0.482116	-0.587607	0.487749	0.139832	0.47429	0.181949
8.42606	0.467506	-0.495729	0.411308	0.133432	0.357179	0.131587
8.47731	0.605969	-0.409824	0.506678	0.133258	0.38878	0.0456444
8.52855	0.526606	-0.517397	0.458723	0.177899	0.371633	-0.21982
8.5798	0.462121	-0.427227	0.317799	0.210503	0.308004	-0.193783
8.63104	0.507546	-0.453617	0.413403	0.177502	0.317221	-0.227052
8.68228	0.492591	-0.362605	0.438702	0.147488	0.337836	-0.375112
8.73353	0.468811	-0.405268	0.304544	0.228923	0.359113	-0.196405
8.78477	0.516583	-0.304068	0.238852	0.130928	0.325269	-0.111524
8.83602	0.481044	-0.378845	0.28942	0.109736	0.209496	-0.095383
8.88726	0.33606	-0.474883	0.110802	0.108986	0.163273	-0.110781
8.93851	0.354488	-0.39407	0.173962	0.013651	0.176384	-0.088593
8.98975	0.417949	-0.422631	0.110348	-0.010149	0.218288	-0.153627
9.041	0.43001	-0.463344	0.20003	0.026125	0.209833	-0.099285
9.09224	0.452064	-0.352171	0.244068	-0.005905	0.193408	-0.144499
9.14348	0.478836	-0.418802	0.152477	-0.010842	0.128664	-0.112474
9.19473	0.388253	-0.481768	0.161716	0.0351559	0.171245	0.0203809
9.24597	0.430293	-0.464188	0.0900687	0.0004901	0.137758	0.116192
9.29722	0.51647	-0.336362	0.178239	0.0303168	0.220172	0.0948939
9.34846	0.421205	-0.377038	0.136123	-0.010125	0.185707	0.0394758
9.39971	0.425291	-0.446111	0.0849104	-0.013038	0.150504	-0.069434
9.45095	0.508845	-0.388013	0.0561697	-0.019411	0.243741	-0.131876
9.5022	0.517862	-0.478287	0.0891451	-0.015256	0.20068	-0.274696
9.55344	0.402232	-0.614404	0.139066	0.0641364	0.168204	-0.14496
9.60469	0.455787	-0.467352	0.151467	-0.053027	0.0021689	-0.085558
9.65593	0.387866	-0.608749	0.106819	-0.033021	0.0477665	0.282937
9.70717	0.40004	-0.672395	0.0651854	0.0196641	0.0126171	0.0465697
9.75842	0.427832	-0.573077	0.158855	-0.03489	0.0711236	0.0326854
9.80966	0.534468	-0.59108	0.154667	0.0328731	0.153733	0.134354
9.86091	0.52694	-0.610028	0.329579	0.0472228	0.0865807	-0.022298
9.91215	0.488542	-0.647953	0.235096	0.0269906	0.137278	-0.07458
9.9634	0.486495	-0.705121	0.327513	2.235e-06	0.125126	0.0812539
10.0146	0.446243	-0.525157	0.378032	0.0673979	0.0502823	0.0893957

## Sheet: 2-1b
Baseline	Reward
1.65167	3.82891
1.53533	3.54013
2.15885	4.51992
1.40028	2.31934
2.71626	3.2042
2.37501	2.08965

## Sheet: 2-1c
Baseline	Reward
0.31808	4.86043
-0.183494	3.54063
0.558279	5.93232
0.0787847	2.47769
1.72514	3.91117
0.526585	0.769059
