# Supplementary material for: A bidirectional corticoamygdala circuit for the encoding and retrieval of detailed reward memories
Source: eLife journal article supplement (doi:10.7554/elife.68617), 2021-06-17
Supplement: supp [file elife-68617-supp-v1.zip › elife_poa_e68617_Figure_3_source_data_1.xlsx]

## Sheet: 3e
Training session	eYFP											ArchT
1	0.493032	0.486719	0.49142	0.440672	0.500221	0.561491	0.534118	0.423458	0.455477	0.591121		0.623873	0.54331	0.529423	0.675138	0.432712	0.525693	0.47195	0.41932
2	0.588946	0.522755	0.593973	0.643918	0.543843	0.662383	0.570617	0.663735	0.431837	0.628485		0.551268	0.60795	0.550687	0.728148	0.465913	0.593624	0.63112	0.57777
3	0.668182	0.573718	0.598183	0.615839	0.638975	0.810428	0.78718	0.75998	0.576579	0.718839		0.605516	0.648976	0.641693	0.791789	0.528442	0.502142	0.809672	0.581623
4	0.819766	0.456923	0.645053	0.64724	0.694174	0.882115	0.651048	0.627423	0.564006	0.63758		0.658658	0.676283	0.614821	0.711538	0.581395	0.624425	0.820531	0.70985
5	0.841822	0.25993	0.648845	0.68146	0.570616	0.812755	0.681486	0.635569	0.708111	0.777351		0.642167	0.697013	0.708949	0.743257	0.683009	0.674861	0.754967	0.756067
6	0.760677	0.286304	0.724728	0.732757	0.658718	0.7888	0.660889	0.611456	0.436404	0.750987		0.695483	0.720259	0.736099	0.792397	0.681202	0.648799	0.680188	0.76071
7	0.747477	0.339901	0.64075	0.738245	0.715598	0.806093	0.722975	0.692937	0.668493	0.826112		0.685026	0.715975	0.688758	0.882802	0.668834	0.665741	0.621832	0.741935
8	0.698991	0.393534	0.638071	0.749655	0.758587	0.797276	0.693958	0.62718	0.752374	0.720866		0.721493	0.682649	0.726059	0.896483	0.668834	0.720224	0.794949	0.731854

## Sheet: 3f
	Same											Different
eYFP	0.504587	0.443548	0.54185	0.916667	0.609023	0.819672	0.883333	0.811111	0.414634	0.544		0.552083	0.408451	0.535714	0.32948	0.416667	0.175258	0.521739	0.5	0.230263	0.645161
ArchT	0.543478	0.390244	0.833333	0.65	0.296296	0.277778	0.339286	0.457143	0.351852			0.411765	0.352941	0.652778	0.580645	0.299145	0.215447	0.707865	0.45614	0.601504

## Sheet: 3g
eYFP	ArchT
0.783251	0.794872
0.516483	0.609137
0.634078	0.709091
0.794224	0.786325
0.70202	0.682081
0.887029	0.659899
0.918182	0.751445
0.752475	0.658863
0.676301	0.517787
0.652733

## Sheet: 3-1
Off	On
9.7	0
12.7	0
10.7	10.3
11	0
11	4.7
11	0
12.5	5
11	0.3
10	0
10	0
11	4
12.5	0

## Sheet: 3-2a
Training session	eYFP pre-CS											eYFP CS											ArchT pre-CS										ArchT CS
1	9.095	3.285	9.78	7.66	11.31	11.41	2.97	3.785	6.91	1.75		8.845	3.115	9.45	6.035	11.32	14.61	3.405	2.78	5.78	2.53		11.47	12.97	12.595	2.94	8.22	11.03	7.53	5.38	2.505		19.025	15.43	14.17	6.11	6.27	12.225	6.73	3.885	1.97
2	9.185	1.94	7.41	8.035	14.41	11.69	8.315	4.78	10.44	5.53		13.16	2.125	10.84	14.53	17.18	22.935	11.05	9.435	7.935	9.355		12.56	15.535	15.38	3.53	8.5	5.545	2.75	5.755	4.72		15.43	24.09	18.85	9.455	7.415	8.1	4.705	7.875	7.36
3	6.935	2.66	8.625	8.125	11.69	5.69	3.785	4.69	8.75	3.97		13.965	3.58	12.84	13.025	20.69	24.325	14	14.85	11.915	10.15		9.44	13.625	10.88	1.065	5.72	5.81	1.22	4.28	5.875		14.49	25.19	19.485	4.05	6.41	5.86	5.19	5.95	5.81
4	3	3.53	7.91	8.595	11.47	2.91	9.16	3.94	8.685	9.345		13.645	2.97	14.375	15.77	26.035	21.775	17.09	6.635	11.235	16.44		10.94	13.185	12.345	0.75	9	5.72	1.25	4.065	4.44		21.11	27.545	19.705	1.85	12.5	9.51	5.715	9.945	6.195
5	2.5	5.31	7.75	9.69	9.06	4.125	7.845	2.5	6.28	3.185		13.305	1.865	14.32	20.73	12.04	17.905	16.785	4.36	15.235	11.12		18.16	8.47	11.22	1.285	6.595	3.505	2.035	4.875	4.035		32.59	19.485	27.33	3.72	14.21	7.275	6.27	15.11	7.06
6	4.875	5.185	6.44	8.505	6.44	5.94	6.75	2.815	1.285	3.155		15.495	2.08	16.955	23.32	12.43	22.185	13.155	4.43	0.995	9.515		9.405	5.185	10.845	2.785	7.53	8.19	2.72	4.72	6.94		21.48	13.35	30.25	10.63	16.09	15.13	5.785	15.005	11.5
7	4.88	4.69	5.845	5.845	6.655	8.625	5.625	3.565	1.815	2.97		14.445	2.415	10.425	16.485	16.745	35.855	14.68	8.045	3.66	14.11		10.78	6.125	11.06	1.69	8.405	9.03	4.625	5.16	9.41		23.445	15.44	24.475	12.73	16.975	17.985	7.605	14.835	11.4
8	6.565	5.44	5.78	7.25	6.255	8.185	7.345	2.565	5.345	5.03		15.245	3.53	10.19	21.71	19.655	32.19	16.655	4.315	16.24	12.99		8.28	6.685	14.16	0.78	8.405	7	2.72	4.47	8.69		21.45	14.38	37.53	6.755	16.975	18.02	10.545	12.2	15.8

## Sheet: 3-2b
eYFP	ArchT
38.38	34.93
28.71	38.99
36.6	39.29
42.285	21.975
37.145	36.7
40.31	39.46
43.43	23.44
22.37	22.11
27.125	17.02
42.135

## Sheet: 3-2c
	preSame											Same											preDifferent											different
eYFP	3.375	4.3125	6.5	0.25	3.25	0.6875	0.4375	1.0625	1.5	7.125		3.4375	3.4375	7.6875	2.75	5.0625	3.125	3.3125	4.5625	1.0625	8.5		2.6875	2.625	2.4375	7.25	2.625	5	0.6875	1.3125	7.3125	3.4375		3.3125	1.8125	2.8125	3.5625	1.875	1.0625	0.75	1.3125	2.1875	6.25
ArchT	1.3125	3.125	0.125	1.3125	4.75	3.25	2.3125	7.125	4.375			1.5625	2	0.625	2.4375	2	1.25	1.1875	6	2.375			0.625	1.375	1.5625	0.8125	5.125	12.0625	1.625	5.8125	3.3125			0.4375	0.75	2.9375	1.125	2.1875	3.3125	3.9375	4.875	5

## Sheet: 3-2d
	pre CS											CS
eYFP	2.75	2.75	8.1875	3.5625	3.6875	1.6875	0.5625	1.5625	3.5	6.75		9.9375	2.9375	14.1875	13.75	8.6875	13.25	6.3125	4.75	7.3125	12.6875
ArchT	1.5	4.8125	1	1.5625	3.4375	4.1875	2.6875	6.375	7.625			5.8125	7.5	2.4375	5.75	7.375	8.125	8.125	12.3125	8.1875

## Sheet: 3-3e
Training session	ArchT yoked control
1	0.492599	0.474547	0.552573	0.466012	0.55604	0.483022	0.561032
2	0.601266	0.585766	0.562402	0.467659	0.620398	0.596539	0.580552
3	0.673937	0.581496	0.638889	0.549249	0.565895	0.604581	0.735694
4	0.636265	0.666379	0.591646	0.656094	0.575099	0.723138	0.696586
5	0.702905	0.661909	0.610496	0.613698	0.681858	0.77756	0.703853
6	0.639632	0.65256	0.647205	0.714593	0.669422	0.717253	0.714352
7	0.650036	0.626455	0.715104	0.744463	0.71662	0.756697	0.815183
8	0.741821	0.664883	0.703443	0.716834	0.706745	0.665531	0.775864

## Sheet: 3-3f
Same	Different
0.681159	0.397436
0.844156	0.5
0.703704	0.209302
0.693694	0.556818
0.473684	0.403061
0.4	0.515625
0.695035	0.267442

[truncated: 1 more sheets: 3-3g]
