# Supplementary material for: A bidirectional corticoamygdala circuit for the encoding and retrieval of detailed reward memories
Source: eLife journal article supplement (doi:10.7554/elife.68617), 2021-06-17
Supplement: supp [file elife-68617-supp-v1.zip › elife_poa_e68617_Figure_4_source_data_1.xlsx]

## Sheet: 4e
Training session	eYFP									ArchT
1	0.621305	0.416667	0.468238	0.51246	0.507241	0.307393	0.532352	0.554913		0.66323	0.556106	0.446459	0.479549	0.534143	0.560782	0.532556	0.449265
2	0.658568	0.539206	0.409351	0.555689	0.625835	0.474474	0.647611	0.628677		0.67362	0.504566	0.574708	0.571914	0.557117	0.675837	0.570405	0.555291
3	0.672988	0.675987	0.531532	0.58957	0.659181	0.765038	0.694312	0.790785		0.597335	0.509599	0.693401	0.580966	0.765069	0.722016	0.748127	0.601222
4	0.708427	0.649739	0.556297	0.449378	0.684153	0.793761	0.589445	0.773367		0.67725	0.673988	0.639225	0.712317	0.821705	0.665586	0.771852	0.628469
5	0.639324	0.676211	0.545087	0.506349	0.719314	0.759357	0.519438	0.68018		0.59648	0.593195	0.565784	0.612406	0.690371	0.731288	0.654852	0.813897
6	0.601978	0.524613	0.645283	0.755295	0.664744	0.811512	0.70117	0.614638		0.505288	0.545996	0.416786	0.581447	0.772444	0.622349	0.748285	0.80054
7	0.58978	0.678801	0.454367	0.712488	0.790871	0.79226	0.678239	0.892816		0.558459	0.716034	0.675012	0.561692	0.872493	0.807099	0.798582	0.782021
8	0.415107	0.662983	0.579832	0.801617	0.748544	0.662445	0.69488	0.66558		0.379679	0.63053	0.7398	0.673893	0.813068	0.782186	0.693095	0.629615

## Sheet: 4f
	Same									Different
eYFP	0.790123	0.523364	0.661417	0.839286	0.774648	0.625	0.487923	0.717391		0.714286	0.2	0.168317	0.342105	0.5	0.453333	0.510204	0.597222
ArchT	0.369565	0.291228	0.833333	0.392857	0.796875	0.683761	0.629412	0.608696		0.530612	0.145833	0.914894	0.409091	0.576923	0.470588	0.91411	0.6

## Sheet: 4g
eYFP	ArchT
0.57485	0.556452
0.573333	0.702128
0.650888	0.775362
0.744186	0.757576
0.730769	0.858974
0.689024	0.666667
0.630137	0.517857
0.762295	0.708738

## Sheet: 4-1
Off	On
1.33	0.67
7.6	3.27
6.6	5
4.67	1.73
6	5
1.07	0.8
1.27	1.2
7.73	6.6

## Sheet: 4-2a
Training session	eYFP pre-CS									eYFP CS									ArchT pre-CS									ArchT CS
1	4.035	0.595	7.785	3.815	6.125	3.56	6.035	7.315		6.62	0.425	6.855	4.01	6.305	1.58	6.87	9.12		1.47	1.345	6.41	1.845	7.095	3.595	13.03	8.06		2.895	1.685	5.17	1.7	8.135	4.59	14.845	6.575
2	4.005	2.38	6.19	5.565	8.125	7	6.565	7.005		7.725	2.785	4.29	6.96	13.59	6.32	12.065	11.86		3.755	7.595	4.91	3.78	10.875	4.065	5.095	8.405		7.75	7.735	6.635	5.05	13.68	8.475	6.765	10.495
3	3.19	3.94	4.16	8.5	9.03	4.16	2.875	4.155		6.565	8.22	4.72	12.21	17.465	13.545	6.53	15.705		5.44	7.28	3.345	7.155	6.47	3.75	4.035	8.155		8.07	7.565	7.565	9.92	21.07	9.74	11.985	12.295
4	2.595	2.345	2.66	7.75	5.75	5.19	6.69	2.255		6.305	4.35	3.335	6.325	12.455	19.975	9.605	7.695		5.845	3.785	4.47	6.47	5.75	3.095	2.845	10.91		12.265	7.825	7.92	16.02	26.5	6.16	9.625	18.455
5	4.375	2.94	1.69	7.97	6.22	5.69	5.13	2.13		7.755	6.14	2.025	8.175	15.94	17.955	5.545	4.53		6.19	4.125	5	5.655	5.595	2.19	5.94	6.16		9.15	6.015	6.515	8.935	12.475	5.96	11.27	26.94
6	3.22	1.69	1.41	6.47	4.94	4.47	5.875	2.185		4.87	1.865	2.565	19.97	9.795	19.245	13.785	3.485		6.315	7.625	4.065	6.565	6.755	2.315	2.935	4.435		6.45	9.17	2.905	9.12	22.93	3.815	8.725	17.8
7	4.375	3	2.78	4.685	3.78	5.905	5.19	0.94		6.29	6.34	2.315	11.61	14.295	22.52	10.94	7.83		4.815	5.685	3.375	4.405	5.53	2.065	3.125	4.595		6.09	14.335	7.01	5.645	37.84	8.64	12.39	16.485
8	4.53	2.44	2.75	3.19	4.75	6.53	5.065	2.565		3.215	4.8	3.795	12.89	14.14	12.815	11.535	5.105		5.22	8.435	1.69	3.535	6.065	4.035	3	9.63		3.195	14.395	4.805	7.305	26.38	14.49	6.775	16.37

## Sheet: 4-2b
eYFP	ArchT
20.035	9.93
35.51	43.35
37.015	7.1
35.275	29.445
41.76	43.665
41.08	27.58
45.62	21.02
14.395	25.21

## Sheet: 4-2c
	preSame									same									preDifferent									different
eYFP	1.0625	3.1875	2.6875	1.125	2	1.5	6.625	0.8125		4	3.5	5.25	5.875	6.875	2.5	6.3125	2.0625		1.875	17.75	5.25	1.5625	3.25	2.5625	3	1.8125		4.6875	4.4375	1.0625	0.8125	3.25	2.125	3.125	2.6875
ArchT	1.8125	12.625	0.1875	1.0625	0.8125	2.3125	3.9375	1.125		1.0625	5.1875	0.9375	0.6875	3.1875	5	6.6875	1.75		2.875	10.25	0.25	1.625	0.6875	3.375	0.875	1.625		3.25	1.75	2.6875	1.125	0.9375	3	9.3125	2.4375

## Sheet: 4-2d
	pre CS									CS
eYFP	4.4375	2	3.6875	0.6875	1.75	3.1875	5.0625	1.8125		6	2.6875	6.875	2	4.75	7.0625	8.625	5.8125
ArchT	3.4375	1.75	1.9375	0.5	0.6875	1.9375	5.0625	1.875		4.3125	4.125	6.6875	1.5625	4.1875	3.875	5.4375	4.5625
