# Supplementary material for: A bidirectional corticoamygdala circuit for the encoding and retrieval of detailed reward memories
Source: eLife journal article supplement (doi:10.7554/elife.68617), 2021-06-17
Supplement: supp [file elife-68617-supp-v1.zip › elife_poa_e68617_Figure_5_source_data_1.xlsx]

## Sheet: 5e
Training session	Control (contralateral eYFP/mCherry & Ipsilateral ArchT/hM4Di)																	Contralateral ArchT/hM4Di
1	0.427676	0.554506	0	0.569339	0.607763	0.583758	0.433502	0.485297	0.511757	0.488335	0.531349	0.440034	0.535442	0.627164	0.621835	0.576375		0.528934	0.607906	0.450235	0.669936	0.491668	0.492174	0.516534	0.462967	0.413381	0.468674
2	0.63776	0.677559	0.152497	0.676809	0.625558	0.6654	0.594837	0.719603	0.591743	0.659895	0.716176	0.530023	0.59102	0.60624	0.589135	0.643898		0.586394	0.66158	0.498304	0.51527	0.631193	0.686827	0.614457	0.588061	0.648981	0.512477
3	0.751008	0.767326	0.373569	0.686723	0.73787	0.657997	0.619295	0.696421	0.671189	0.636099	0.576775	0.618474	0.687525	0.777058	0.666168	0.690672		0.686666	0.58808	0.71548	0.705609	0.668025	0.732517	0.649424	0.680784	0.676633	0.67659
4	0.739785	0.671751	0.548489	0.723535	0.739048	0.66474	0.656579	0.622653	0.534507	0.743911	0.784791	0.704594	0.563579	0.77382	0.667206	0.724556		0.654338	0.588516	0.600132	0.722262	0.738544	0.644971	0.607399	0.735423	0.720158	0.759826
5	0.736459	0.752572	0.631964	0.723075	0.809957	0.627852	0.746582	0.655273	0.555885	0.724992	0.721689	0.767462	0.372094	0.8323	0.809496	0.768958		0.702989	0.582058	0.675285	0.74331	0.715295	0.631394	0.740474	0.817056	0.761649	0.82716
6	0.754149	0.772088	0.665699	0.739846	0.815901	0.648217	0.73852	0.602949	0.616206	0.593683	0.830931	0.834537	0.368137	0.85307	0.785893	0.824127		0.676605	0.752095	0.692205	0.781449	0.759694	0.761816	0.673594	0.821011	0.778841	0.79345
7	0.771345	0.764464	0.669087	0.691295	0.839681	0.715605	0.739991	0.647646	0.577416	0.524582	0.786486	0.753886	0.575018	0.742817	0.816265	0.744216		0.744435	0.837647	0.667739	0.649107	0.761146	0.826345	0.699923	0.860361	0.78791	0.82944
8	0.746083	0.75539	0.757218	0.72984	0.828954	0.764315	0.780415	0.648478	0.697535	0.548783	0.742348	0.780936	0.720562	0.769369	0.734809	0.823452		0.67949	0.709906	0.693587	0.788461	0.827604	0.698672	0.765164	0.815916	0.776202	0.780093

## Sheet: 5f
	Same																	Different
Control (Contralateral eYFP/mCherry & Ipsilateral ArchT/hM4Di)	0.736667	0.732394	0.558824	0.73057	0.813333	0.795181	0.794118	0.54	0.614458	0.8125	0.482759	0.585185	0.804124	0.976744	0.974026	0.511905		0.450382	0.477273	0.333333	0.5	0.7625	0.510638	0.57971	0.463768	0.372881	0.419355	0.696429	0.396825	0.756757	0.69697	0.576923	0.696429
Contralateral ArchT/mCherry	0.391892	0.474359	0.459677	0.756303	0.915493	0.5	0.747967	0.75	0.805882	0.748344								0.833333	0.53125	0.568421	0.560606	0.84	0.804348	0.803922	0.5	0.652174	0.595668

## Sheet: 5g
Control (Contralateral eYFP/mCherry & Ipsilateral ArchT/hM4Di)	Contralateral ArchT/hM4Di
0.7	0.532258
0.727092	0.537634
0.630137	0.711765
0.657718	0.733813
0.768595	0.84375
0.848101	0.832117
0.595238	0.566337
0.603175	0.817259
0.663934	0.815789
0.663265	0.748175
0.745223
0.696429
0.932642
0.825
0.696429
0.59

## Sheet: 5-1a
Training session	Contralateral eYFP/mCherry baseline										Contralateral eYFP/mCherry CS									Ipsilateral ArchT/hM4Di baseline									Ipsilateral ArchT/hM4Di CS									Contralateral ArchT/hM4Di baseline											Contralateral ArchT/hM4Di CS
1	10.375	18.5625	1.375	14.7188	6.125	4.0625	9.53125	13.7188			7.75285	23.1047	0	19.4583	9.49055	5.69745	7.29361	12.935		14.6875	8.9375	9.84375	7.21875	14.375	8.15625	9.1875	13.1562		15.3948	8.53	11.1607	5.67266	16.5684	13.72	15.1074	17.9001		15.4688	2.40625	4.75	10	9.61458	13.25	14.25	10.0625	7.03125	8.96875		17.369
2	7.875	15.0312	1.78125	5.5625	9.0625	6.03125	6.3125	10.3438			13.8647	31.5858	0.320513	11.6487	15.1402	11.994	9.26763	26.5459		9.9375	9.4375	9.78125	9.3125	12.0938	9.09375	11.8438	12.3125		14.4038	18.3113	24.6812	10.5023	17.4768	14.0009	16.9826	22.2632		10.7812	4.78125	6.8125	13.375	15.375	10.375	13.9375	7.96875	7.6875	14.4375		15.2852
3	6.71875	9.65625	6.5	11.9062	8.0625	4.21875	5.46875	10.7812			20.265	31.845	3.87624	26.0993	22.6951	8.11667	8.89605	24.7325		8.09375	8.9375	7.375	9.71875	6.3125	4.5625	8.25	8.875		16.5215	15.6227	10.0507	15.7546	13.8891	15.9024	16.463	19.8162		14.0938	5.78125	6.5	8.4375	11.2812	6.09375	13.2812	6.09375	9.5	11.0625		30.8862
4	6.875	13.1562	7.5	9.09375	9.6875	6.40625	6.09375	9.4375			19.5455	26.9239	9.11089	23.7993	27.4362	12.7021	11.6505	15.5726		13.625	3.96875	5.34375	9.1875	4.875	4.75	8.375	5.65625		15.645	11.5288	19.4868	21.9138	6.2954	16.251	16.7908	14.8787		13.5625	9.46875	8	5.03125	13.1562	9.59375	19.625	6.71875	11.2812	11.9062		25.6738
5	8.0625	15.0312	6.96875	10.3125	8.59375	7.375	4.15625	10.125			22.5305	45.7188	11.9662	26.9269	36.6264	12.4424	12.2446	19.2461		7.875	2.4375	5.96875	7.6875	6.46875	4.90625	4.21875	4.1875		9.85691	6.42586	15.4776	25.3716	3.83335	24.3498	17.9265	13.9369		12.5	12.9062	4.46875	3.9375	11.0625	7.96875	9.84375	6.65625	8.21875	6.90625		29.586
6	7.21875	11.25	6	9	5.96875	8.46875	7.40625	11.3438			22.1436	38.111	11.9479	25.5949	26.4527	15.605	20.9181	17.2263		8.875	3.84375	3.09375	5.5	6.78125	4.3125	7.0625	3.59375		14.2494	5.61622	15.205	27.7401	3.9509	25.0381	25.9233	16.8401		16.875	7.9375	5.4375	3.46875	6.59375	6.5	12.9688	5.84375	5.90625	7.58364		35.3058
7	6	9.5625	4.9375	10.6875	4.75	5.6875	9.3125	8.34375			20.2404	31.0364	9.98335	23.9329	24.8785	14.3111	26.5036	15.3362		10.5625	5.3125	3.4375	8.625	10.625	8.25	5.625	5.46875		14.4325	5.86189	12.6622	26.4197	14.376	23.8283	24.9898	15.9116		10.4062	5.40625	5.75	6.375	7.46875	4.15625	10.7188	5.875	6.6875	9.25		30.3124
8	4.4375	11.0625	4.5625	9.53125	7.40625	4.03125	7	7.1875			13.0387	34.1626	14.2301	25.7487	35.8935	13.0732	24.8783	13.2593		8.9375	6.09375	3.375	7.78125	10.0156	9.1875	7.75	3		20.6114	7.4114	9.72408	27.7391	25.8264	30.6489	21.4743	13.9925		22.3125	8.03125	6.5	5.6875	6.90625	12.75	6.46181	5.375	10.2188	10.0625		47.303
[truncated: 9 more columns]

## Sheet: 5-1b
Control	Ipsilateral	Contralateral
31.8816	37.3959	27.2625
34.9587	33.7232	41.1982
31.9286	37.0554	39.8784
49.8417	16.7447	42.2498
38.1251	25.3227	29.9865
25.751	23.9646	30.4257
37.1639	57.1559	29.5869
28.48	25.3554	29.6688
		28.5649
		57.4588

## Sheet: 5-1c
	preCS- Same lever											CS- Same lever											preCS- Different lever											CS- Different lever
eYFP/mCherry	4.9375	1.1875	0.9375	3.25	0.875	1.0625	0.875	4.3125				13.8125	3.25	1.1875	8.8125	3.8125	4.125	3.375	5.0625				4.5	4.3125	2.375	3.25	2.375	1.4375	1.8125	2.3125				3.6875	3.9375	1.1875	3.25	7.625	1.5	2.5	2
Ipsilateral ArchT/hM4Di	4	0.5625	2.8125	3.5	1.1875	0.125	0.125	2.5625				6.375	2.4375	2.625	4.9375	4.875	5.25	4.6875	2.6875				4.625	1.125	1.0625	2.375	0.5625	0.625	1.375	1.0625				2.75	0.8125	2.4375	1.5625	1.75	1.4375	1.875	2.4375
Contralateral ArchT/hM4Di	2.81	5.13	4.1875	1.8125	0.375	1.5	1.9375	1.1875	2.0625	4.75		1.81	4.63	3.5625	5.625	4.0625	1.5	5.75	3.5625	8.5625	14.125		0.06	3.75	2.5625	3.625	0.25	0.5625	0.625	1.8125	1.5	7		0.31	4.25	3.375	4.625	1.3125	2.3125	2.5625	1.8125	2.8125	10.3125

## Sheet: 5-1d
	preCS												CS
eYFP/mCherry	4.3125	8.5625	1.6875	3.1875	3.5	0.75	3.1875	3.125					10.0625	22.8125	2.875	6.125	11.625	4.1875	4.6875	4.75
Ipsilateral ArchT/hM4Di	5.125	2.0625	2.5	2.125	0.8125	1.3125	2.125	2.5625					10.125	4.0625	7.3125	4.875	11.25	6.1875	4.875	3.6875
Contralateral ArchT/hM4Di	3.625	5.375	3.0625	2.3125	1.25	1.4375	13.6875	2.25	2.625	4.3125			4.125	6.25	7.5625	6.375	6.75	7.125	17.875	10.0625	11.625	12.8125	12.8125
